# Supplementary material for: First atroposelective Chan–Lam coupling for the synthesis of C–N linked biaryls
Source: Royal Society of Chemistry journal article supplement (doi:10.1039/d3cc05447k), 2023-12-19
Supplement: d3cc05447k1.pdf [file d3cc05447k1.pdf]

## Synthesis of C–N Axially Chiral Biaryls via Asymmetric Chan-Lam Coupling

Moeka Ishida, Rina Adachi, Kazuki Kobayashi, Yukiko Yamamoto,  
Chinatsu Kawahara, Tsuyoshi Yamada, Hiroshi Aoyama, Kyohei Kanomata,  
Shuji Akai, Patrick Y. S. Lam, Hironao Sajiki, Takashi Ikawa,\*

Laboratory of Organic Chemistry, Gifu Pharmaceutical University, Daigaku-Nishi, Gifu 501-1196,  
Japan

Graduate School of Pharmaceutical Sciences, Osaka University, 1-6 Yamadaoka, Suita, Osaka 565-  
0871, Japan.

Baruch S. Blumberg Institute, Doylestown, Pennsylvania, 18902, USA

E-mail: [ikawa-ta@gifu-pu.ac.jp](mailto:ikawa-ta@gifu-pu.ac.jp)

### Table of contents

|                                                                                           |     |
|-------------------------------------------------------------------------------------------|-----|
| 1. The ratio and amount optimizations of copper and ligand <b>4j</b> .....                | S2  |
| 2. General considerations.....                                                            | S3  |
| 3. Experimental procedure, spectroscopic and numerical data                               |     |
| 3-1. Synthesis of ligand <b>4j</b> .....                                                  | S5  |
| 3-2. Preparation of optically active catalyst Stock Solution (A).....                     | S7  |
| 3-3. Preparation of none-optically active catalyst Stock Solution (B).....                | S7  |
| 3-4. Asymmetric coupling between imidazole and boronic acid.....                          | S7  |
| 3-5. Synthesis of racemic coupling product between imidazole and aryl boronic acid.....   | S7  |
| 3-6. Spectroscopic and numerical data of the coupling product.....                        | S9  |
| 3-7. Large scale synthesis of <b>3b</b> .....                                             | S13 |
| 4. Transformation of coupling product <b>3b</b>                                           |     |
| 4-1. Recrystallization of <b>3b</b> .....                                                 | S55 |
| 4-2. Suzuki coupling.....                                                                 | S57 |
| 4-3. Sonogashira coupling.....                                                            | S59 |
| 4-4. Reductive dehalogenation.....                                                        | S62 |
| 4-5. Metallative methylation.....                                                         | S64 |
| 5. X-Ray Data of <b>3b</b> .....                                                          | S66 |
| 6. Rotational barrier of ( <i>S</i> )- <b>3w</b> .....                                    | S68 |
| 7. Experimental references.....                                                           | S69 |
| 8. <sup>1</sup> H, <sup>13</sup> C, and <sup>19</sup> F NMR spectra of new compounds..... | S70 |

# 1. The ratio and amount optimizations of copper and ligand 4j:

**Table S1**

| entry | Cu cat. : <b>4j</b> (mol%) | temp.  | MnO <sub>2</sub> | yield (%) of <b>3a</b> | ee (%) of <b>3a</b> |
|-------|----------------------------|--------|------------------|------------------------|---------------------|
| 1     | 25 : 0                     | 25 °C  | +                | 33                     | 0                   |
| 2     | 25 : 0                     | 25 °C  | -                | 9                      | 0                   |
| 3     | 25 : 12.5                  | 25 °C  | +                | 95                     | 48                  |
| 4     | 25 : 12.5                  | 25 °C  | -                | 16                     | 38                  |
| 5     | 25 : 25                    | 25 °C  | +                | 90                     | 66                  |
| 6     | 25 : 25                    | 25 °C  | -                | 22                     | 64                  |
| ----- |                            |        |                  |                        |                     |
| 7     | 25 : 50                    | 100 °C | +                | 89                     | 68                  |
| 8     | 25 : 50                    | 75 °C  | +                | 90                     | 72                  |
| 9     | 25 : 50                    | 50 °C  | +                | 90                     | 72                  |
| 10    | 25 : 50                    | 25 °C  | +                | 94                     | 72                  |
| 11    | 25 : 50                    | 25 °C  | -                | 37                     | 78                  |
| 12    | 25 : 50                    | -10 °C | +                | 12                     | 80                  |

**Table S2**

| entry | Cu cat. : <b>4j</b> (mol%) | time       | ratio (%)<br><b>1b</b> : <b>3b</b> | ee (%) of <b>3b</b> |
|-------|----------------------------|------------|------------------------------------|---------------------|
| 1     | 25 : 50                    | 1 h        | 95 : 5                             | -                   |
| 2     | 25 : 50                    | 3 h        | 69 : 31                            | 86                  |
| 3     | 25 : 50                    | 5 h        | 37 : 63                            | 86                  |
| 4     | 25 : 50                    | 7 h        | 2 : 98                             | 84                  |
| 5     | 25 : 50                    | <b>9 h</b> | 0 : 100                            | 84                  |
| 6     | 50 : 100                   | 22 h       | 0 : 100                            | 82                  |
| 7     | 25 : 50                    | 22 h       | 0 : 100                            | 86                  |
| 8     | 13 : 26                    | 22 h       | 0 : 100                            | 80                  |
| 9     | 8 : 16                     | 22 h       | 0 : 100                            | 80                  |
| 10    | <b>4 : 8</b>               | 22 h       | 0 : 100                            | 82                  |
| 11    | 2 : 4                      | 22 h       | 32 : 68                            | 84                  |
| 12    | 1 : 2                      | 22 h       | 95 : 5                             | 86                  |

## 2. General considerations:

**Reagents:** A test tube and a septum cap were used for the coupling reaction and the reaction temperature was controlled using Chemist Plaza CP-10 purchased from SIBATA SCIENTIFIC TECHNOLOGY. Anhydrous THF was purchased from Kanto Chemical and purified with a Glass Contour solvent dispensing system (Nikko Hansen) using two packed columns of activated molecular sieves. Wako 1st Grade MeOH was used for the coupling reactions.  $\text{Cu}(\text{NO}_3)_2 \cdot 3\text{H}_2\text{O}$ , 99.9% and  $\text{MnO}_2$ , 99.5% were purchased from FUJIFILM Wako Pure Chemical and used without further purification. (4*S*,4'*S*)-2,2'-(propane-2,2-diyl)bis(4-isopropyl-4,5-dihydrooxazole) **4a** was purchased from Tokyo Chemical Industry and used without further purification. Chiral bisoxazoline ligands ((4*S*,4'*S*)-2,2'-(pentane-3,3-diyl)bis(4-isopropyl-4,5-dihydrooxazole) (**4b**),<sup>[4,3]</sup> (4*S*,4'*S*)-2,2'-(1,3-diphenylpropane-2,2-diyl)bis(4-isopropyl-4,5-dihydrooxazole) (**4c**),<sup>[4,3]</sup> (4*S*,4'*S*)-2,2'-(2,6-dimethylheptane-4,4-diyl)bis(4-isopropyl-4,5-dihydrooxazole) (**4d**),<sup>[4,3]</sup> (4*S*,4'*S*)-2,2'-(cyclopentane-1,1-diyl)bis(4-isopropyl-4,5-dihydrooxazole) (**4e**),<sup>[4,6]</sup> (*S*)-4-((*R*)-sec-butyl)-2-(2-((*S*)-4-((*S*)-sec-butyl)-4,5-dihydrooxazol-2-yl)propan-2-yl)-4,5-dihydrooxazole (**4f**),<sup>[5,7]</sup> (4*S*,4'*S*)-2,2'-(propane-2,2-diyl)bis(4-ethyl-4,5-dihydrooxazole) (**4g**),<sup>[5,8]</sup> (4*S*,4'*S*)-2,2'-(propane-2,2-diyl)bis(4-cyclohexyl-4,5-dihydrooxazole) (**4h**),<sup>[5,9]</sup> (*S*)-4-((*R*)-sec-butyl)-2-(3-((*S*)-4-((*S*)-sec-butyl)-4,5-dihydrooxazol-2-yl)pentan-3-yl)-4,5-dihydrooxazole (**4i**),<sup>[5,10]</sup> 2-methoxy-1-naphthyl boronic acid<sup>[11]</sup> and 2-methoxymethyl-1-naphthyl boronic acid<sup>[12-14]</sup> were prepared according to the literature. All other reagents were purchased from FUJIFILM Wako Pure Chemical, Tokyo Chemical Industry, Sigma-Aldrich (Merck), NACALAI TESQUE, Kishida Chemical, Chem Impex International, Oakwood Products, and Combi-Blocks and used without further purification. Flash chromatography was performed with silica gel 60N, spherical neutral (40–50  $\mu\text{m}$ ), purchased from Kanto Chemical. All reactions were monitored by thin-layer chromatography (TLC) on glass-backed silica gel 60 F<sup>254</sup>, 0.2 mm plates (Merck), and compounds were visualized under UV light (254 nm) and dipped with TLC stain with ceric ammonium molybdate solution.

**Analytical methods:** IR spectra were recorded by a Bruker FT-IR ALPHA. High-resolution mass spectra (HRMS) were measured by Waters AQUITY H-class RDa. Melting points were measured by a SANSYO SMP-300 melting point apparatus. Optical rotations were measured by ATAGO AP-300 automatic polarimeter. <sup>1</sup>H NMR, <sup>13</sup>C NMR, and <sup>19</sup>F NMR spectra were recorded on a JEOL JMN-ECA-500 (<sup>1</sup>H: 500 MHz, <sup>13</sup>C: 125 MHz, <sup>19</sup>F: 470 MHz), a JEOL JMN-ECS-400 (<sup>1</sup>H: 400 MHz, <sup>13</sup>C: 100 MHz). Instrument with chemical shifts reported in ppm relative to the residual deuterated solvent. GC spectra were taken on SHIMADZU GC-2010. Chiral HPLC measurements

were performed on a Shimadzu system with a quaternary low-pressure LC-20AD pump, an automatic SIL-20A HT injector, a CTO-10AS oven and a SPD-M20 with diode array detector (DAD). The injection volume was 1.0–10  $\mu\text{L}$ , the temperature of the oven set to 30  $^{\circ}\text{C}$  and the concentration of the sample around 0.10–1.0 mg/L. Preparative recycling gel permeation chromatography (GPC) was performed with LaboACE LC-5060 Plus II equipped with JAIGEL-2HR Plus column (chloroform as an eluent). X-ray single crystal diffraction data were recorded on Rigaku XtaLAB mini II. The chromatogram of the racemic compound is on the left, the one of the enantiomerically enriched compound is on the right. “Yield” refers to the isolated yields of compounds showing at most only trace peaks in the  $^1\text{H}$  NMR spectra that are not attributable to the assigned structure.  $^1\text{H}$  NMR,  $^{13}\text{C}$  NMR and melting points (where applicable) of all known compounds were taken. All new products were further characterized by  $^{13}\text{C}$  NMR, IR, and high resolution mass spectrum (HRMS). The absolute stereochemistry of coupling product (*S*)-**3b** was confirmed by a single-crystal X-ray structure analysis.

### 3. Experimental procedure, spectroscopic and numerical data:

#### 3-1. Synthesis of ligand 4j

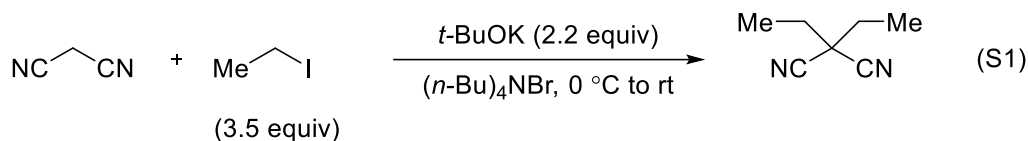

**Diethyl malononitrile:**<sup>[1]</sup> Malononitrile (20 g, 0.30 mol), tetra(*n*-butylammonium)bromide (3.9 g, 12 mmol) and iodoethane (142 mL, 1.3 mol) were charged in an oven-dried 1.0 L flask and mixed for 30 min at 0 °C by an overhead stirrer. Potassium *tert*-butoxide (74 g, 0.66 mol) was added in the flask and stirred for 2 days. To the obtained mixture was poured water (ca. 100 mL) and Et<sub>2</sub>O (ca. 300 mL), and then the aqueous phase was washed three times with Et<sub>2</sub>O. The ethereal solution was washed with brine, dried over anhydrous magnesium sulfate, and evaporated to afford the crude product. The crude product was purified by a silica-gel column (Et<sub>2</sub>O) to afford the titled compound (7.5 g, 20% yield) as a colorless solid. <sup>1</sup>H NMR (400 MHz, CDCl<sub>3</sub>) δ: 1.27 (6 H, t, *J* = 7.5 Hz), 2.07 (4 H, q, *J* = 7.5 Hz). <sup>13</sup>C NMR (100 MHz, CDCl<sub>3</sub>) δ: 9.8, 31.0, 39.6, 115.4.

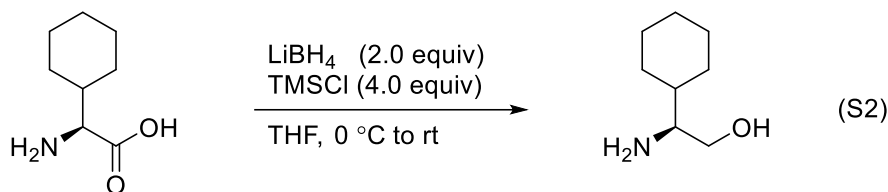

**(R)-2-Amino-2-cyclohexylethan-1-ol:**<sup>[2]</sup> Lithium borohydride (ca. 4 mol/L in THF) (25 mL) and anhydrous THF (25 mL) were charged in a 300 mL three-necked flask. After stirring for 15 min at 0 °C, chlorotrimethylsilane (26 mL, 0.2 mol) was added dropwise into the flask and stirred for 15 min at room temperature. The reaction mixture was cooled to 0 °C. A solution of 2-cyclohexylglycine (7.9 g, 50 mmol) in THF (25 mL) was added dropwisely to the mixture at 0 °C. The mixture was stirred overnight at room temperature, quenched with MeOH (80 mL). To the obtained mixture was poured 2.5 M of saturated sodium hydroxide (40 mL). After evaporation of the reaction mixture, the aqueous phase was washed three times with CH<sub>2</sub>Cl<sub>2</sub>. The combined organic phase was dried over MgSO<sub>4</sub>, evaporated to afford the titled compound (4.1 g, 58 % yield) as a colorless solid.  $[\alpha]_D^{20} = +6.4$  (c 0.5, MeOH). <sup>1</sup>H NMR (400 MHz, CDCl<sub>3</sub>) δ: 0.98–1.32 (6 H,

m), 1.66–1.77 (5 H, m), 2.67 (1 H, brs), 3.36–3.41 (1 H, m), 3.52 (2 H, brs), 3.67–3.70 (1 H, m).  
<sup>13</sup>C NMR (100 MHz, CDCl<sub>3</sub>) δ: 26.1, 26.3, 29.0, 29.3, 40.7, 57.7, 63.5.

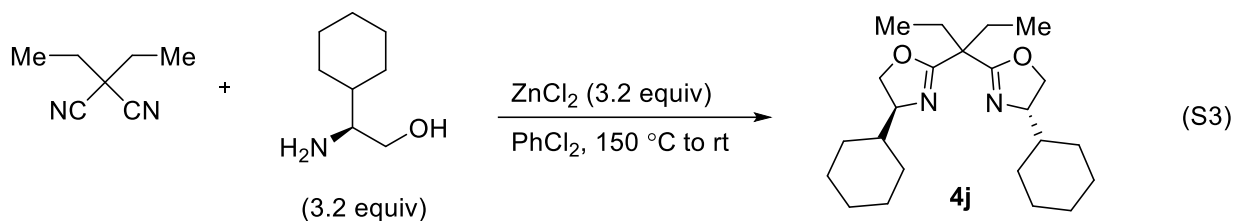

**(4*S*,4'*S*)-2,2'-(Pentane-3,3-diyl)bis(4-cyclohexyl-4,5-dihydrooxazole) (4j):**<sup>[3,15]</sup> Diethyl malononitrile (0.80 g, 6.5 mmol), zinc chloride (2.8 g, 21 mmol), (*R*)-2-amino-2-cyclohexylethan-1-ol (3.0 g, 21 mmol) and *o*-dichlorobenzene (20 mL) were added to a 300 mL two-necked flask. The reaction mixture was stirred at 150 °C for 7 h. The reaction mixture was cooled to room temperature. To the reaction mixture were added water (3.0 mL) and ethylenediamine (6.0 mL), and the reaction mixture was stirred at room temperature for 1 h. Water (30 mL) and Et<sub>2</sub>O (100 mL) were added to the reaction mixture and the aqueous phase was washed three times with Et<sub>2</sub>O. The combined organic phase was washed three times with saturated ammonium chloride, and dried over MgSO<sub>4</sub>. The mixture was evaporated to afford the titled compound (1.9 g, 80% yield) as a pale yellow oil.  $[\alpha]_D^{20} = +116.0$  (c 1.0, MeOH). IR: 1653, 2921 cm<sup>-1</sup>. <sup>1</sup>H NMR (400 MHz, CDCl<sub>3</sub>) δ: 0.81–0.84 (6 H, m), 1.00 (4 H, m), 1.12–1.24 (4 H, m), 1.45 (2 H, m), 1.57–1.82 (12 H, m), 1.94–2.02 (4 H, m), 3.94–3.99 (4 H, m), 4.14–4.19 (2 H, m). <sup>13</sup>C NMR (100 MHz, CDCl<sub>3</sub>) δ: 8.0, 24.9, 25.8, 25.9, 26.3, 28.2, 29.1, 42.2, 46.3, 69.5, 70.7, 166.7.

**3-2. Procedure for the preparation of optically active catalyst Stock Solution (A):** Cu(NO<sub>3</sub>)<sub>2</sub>·3H<sub>2</sub>O (64 mg, 0.25 mmol) and MeOH (10 mL, 0.025 M) were charged in a 10 mL vial. The mixture was added to **4j** (188 mg, 0.50 mmol) in a 20 mL vial. After the sonication for 15 min, the Stock Solution (A) (0.025 M) was capped with septum and evacuated and back-filled with Ar (This operation was repeated three times).

**3-3. Procedure for the preparation of none-optically active catalyst Stock Solution (B):** Cu(NO<sub>3</sub>)<sub>2</sub>·3H<sub>2</sub>O (64 mg, 0.25 mmol) and MeOH (10 mL, 0.025 M) were charged in a 10 mL vial. The mixture was added to TMEDA or (±)-**4j** (188 mg, 0.50 mmol) in a 20 mL vial. After the sonication for 15 min, the Stock Solution (B) (0.025 M) was capped with septum and evacuated and back-filled with Ar (This operation was repeated three times).

#### 3-4. Asymmetric coupling between imidazole **1** and aryl boronic acid **2**

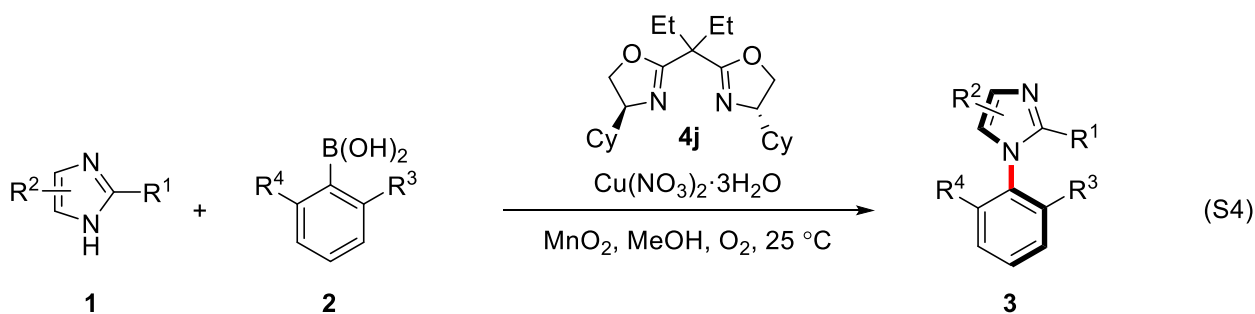

**General Procedure I:** To a test tube were added the imidazole **1** (0.20 mmol), the boronic acid **2** (0.40 mmol) and MnO<sub>2</sub> (2.0–20 mmol). After the Stock Solution (A) [2.0 mL, 0.050 mmol (Cu), 0.10 mmol (**4j**)] was added, the mixture was evacuated and backfilled with O<sub>2</sub> (This operation was repeated three times). The reaction mixture was stirred under an O<sub>2</sub> atmosphere (balloon) at 25 °C for 22 h and passed through Celite with EtOAc. The filtrate was concentrated in vacuo. The purification of the crude product with a silica-gel column chromatography using hexane/EtOAc gave the *N*-arylation product **3**. If required, the product was further purified by GPC. The enantiomeric excess was determined by HPLC (UV detection monitored at 254 nm).

#### 3-5. Synthesis of racemic coupling product between imidazole **1** and aryl boronic acid **2**

**General Procedure II:** To a test tube were added the imidazole **1** (0.20 mmol), the boronic acid **2**

(0.40 mmol) and MnO<sub>2</sub> (2.0–20 mmol). After the Stock Solution (B) [2.0 mL, 0.05 mmol (Cu), 0.1 mmol (TMEDA or (±)-**4j**)] was added, the mixture was evacuated and backfilled with O<sub>2</sub> (This operation was repeated three times). The reaction mixture was stirred under an O<sub>2</sub> atmosphere (balloon) at 25 °C for 22 h and passed through Celite with EtOAc. The filtrate was concentrated in vacuo. The purification of the crude product with a silica-gel column chromatography using hexane/EtOAc gave a mixture of the *N*-arylation product. If required, the product was further purified by GPC. The enantiomeric excess was determined by HPLC (UV detection monitored at 254 nm).



### 3-6. Spectroscopic and numerical data of the coupling product

#### 1-(2-Methoxynaphthalen-1-yl)-2-chloro-benzo[d]imidazole (**3a**) (Table 2)

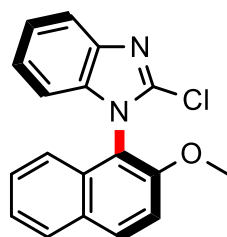

**3a**

**(S)-1-(2-Methoxynaphthalen-1-yl)-2-chloro-benzo[d]imidazole [(S)-3a]:** Following the General Procedure I, a mixture of 2-chloro-benzimidazole (**1a**) (31 mg, 0.20 mmol), 2-methoxynaphthalene boronic acid (**2a**) (81 mg, 0.40 mmol) and MnO<sub>2</sub> (174 mg, 2.0 mmol) in the Stock Solution (A) [2.0 mL, 0.050 mmol (Cu), 0.10 mmol (**4j**)] was stirred for 22 h at 25 °C. The crude material was purified by column chromatography on silica gel (hexane/EtOAc = 2:1) to afford the titled compound (*S*)-**3a** (65 mg, quant, 74% ee) as a colorless solid.  $[\alpha]_D^{20} = +61.3$  (c 1.0, MeOH). Mp: 139–140 °C. IR: 2838 cm<sup>-1</sup>. <sup>1</sup>H NMR (400 MHz, CDCl<sub>3</sub>) δ: 3.86 (3 H, s), 6.82 (1 H, d, *J* = 8.0 Hz), 7.13–7.20 (2 H, m), 7.32 (1 H, dd, *J* = 7.5, 7.5 Hz), 7.39–7.43 (2 H, m), 7.46 (1 H, d, *J* = 9.0 Hz), 7.82 (1 H, d, *J* = 8.0 Hz), 7.91–7.94 (1 H, m), 8.09 (1 H, d, *J* = 9.0 Hz). <sup>13</sup>C NMR (100 MHz, CDCl<sub>3</sub>) δ: 57.4, 111.4, 114.2, 116.6, 120.3, 122.2, 123.8, 124.4, 125.5, 129.3, 129.8, 132.4, 132.8, 137.7, 143.0, 143.3, 154.8. HRMS (ESI, TOF) Calcd for C<sub>18</sub>H<sub>14</sub>ClN<sub>2</sub>O [M+H]<sup>+</sup>: 309.0795. Found: 309.0784. Rt: (DAICEL CHIRALCEL<sup>®</sup> OJ-H, hexane/EtOH/Et<sub>2</sub>NH = 90/10/0.1, 1.0 mL/min, 30 °C, 254 nm): 14.20 min (87%), 15.99 min (13%).

**(rac)-1-(2-Methoxynaphthalen-1-yl)-2-chloro-benzo[d]imidazole [(rac)-3a]:** Following the General Procedure II, a mixture of 2-chloro-benzimidazole (**1a**) (0.61g, 4.0 mmol), 2-methoxynaphthalen boronic acid (**2a**) (1.6 g, 8.0 mmol) and MnO<sub>2</sub> (3.5 g, 40 mmol) in the Stock Solution (B) [40 mL, 1.0 mmol (Cu), 2.0 mmol (TMEDA)] was stirred for 22 h at 25 °C. The crude material was purified by column chromatography on silica gel (hexane/EtOAc = 2:1) to afford the titled compound (*rac*)-**3a** as a colorless solid (1.3 g, 99% isolated yield). <sup>1</sup>H NMR spectra was identical with chiral one shown above. Rt: (DAICEL CHIRALCEL<sup>®</sup> OJ-H, hexane/EtOH/Et<sub>2</sub>NH = 90/10/0.1, 1.0 mL/min, 30 °C, 254 nm): 14.48 min (50%), 16.37 min (50%).

## HPLC data of 1-(2-methoxynaphthalen-1-yl)-2-chloro-benzo[*d*]imidazole (3a)

### 【PDA chromatograms】

(*rac*)-3a

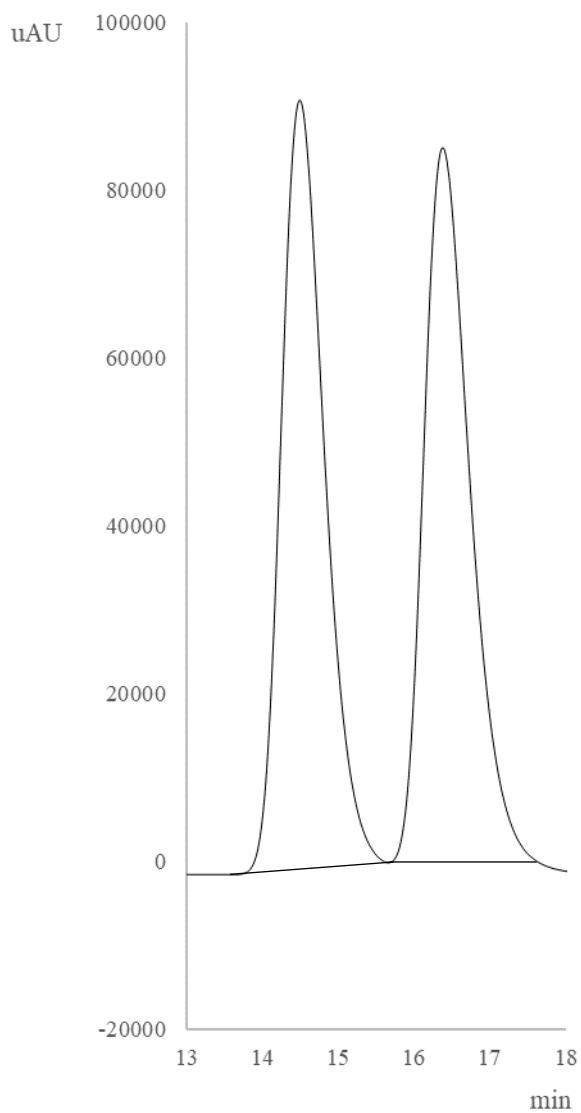

(*S*)-3a

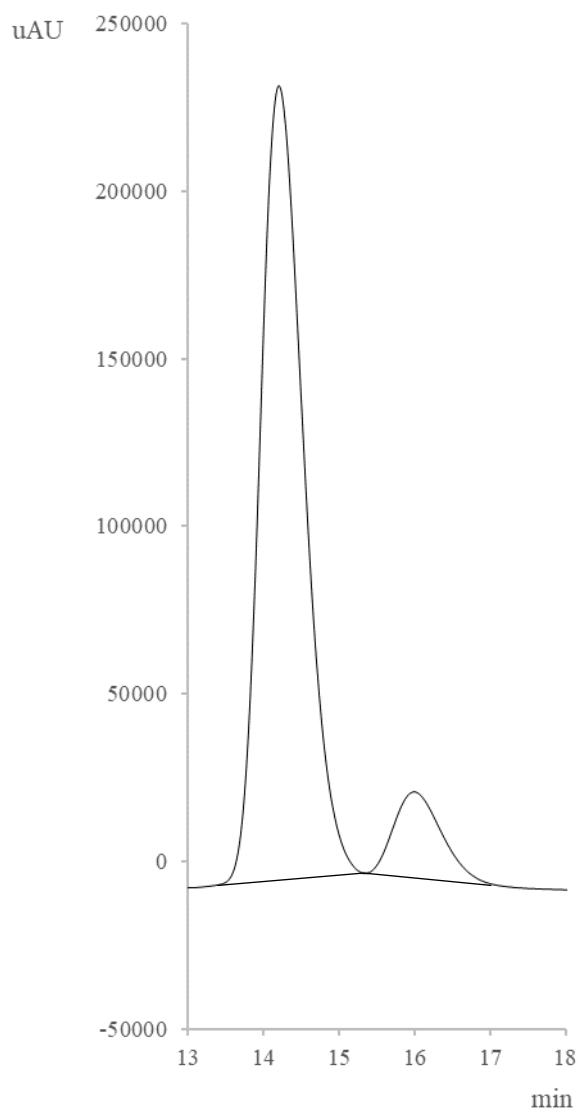

### 【PDA Table】 Monitored at 254 nm

| Peak# | Ret.time | Area    | Area% |
|-------|----------|---------|-------|
| 1     | 14.483   | 3756545 | 49.53 |
| 2     | 16.37    | 3828190 | 50.47 |
| Total |          | 7584735 | 100   |

| Peak# | Ret.time | Area     | Area% |
|-------|----------|----------|-------|
| 1     | 14.198   | 9821933  | 86.80 |
| 2     | 15.99    | 1493828  | 13.20 |
| Total |          | 11315761 | 100   |

### 1-(2-Methoxynaphthalen-1-yl)-2-bromo-benzo[*d*]imidazole (**3b**) (Table 3)

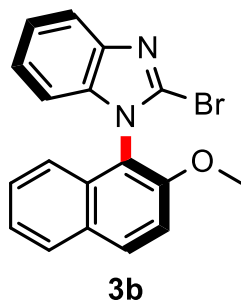

**(*S*)-1-(2-Methoxynaphthalen-1-yl)-2-bromo-benzo[*d*]imidazole [(*S*)-**3b**]:** Following the General Procedure I, a mixture of 2-bromo-benzimidazole (**1b**) (41 mg, 0.20 mmol), 2-methoxynaphthalene boronic acid (**2a**) (81 mg, 0.40 mmol) and MnO<sub>2</sub> (174 mg, 2.0 mmol) in the Stock Solution (A) [2.0 mL, 0.050 mmol (Cu), 0.10 mmol (**4j**)] was stirred for 22 h at 25 °C. The crude material was purified by column chromatography on silica gel (hexane/EtOAc = 2:1) to afford the titled compound (*S*)-**3b** (66 mg, 94% isolated yield, 85% ee) as a colorless solid.  $[\alpha]_{\text{D}}^{20} = +75.7$  (c 1.0, MeOH). Mp: 141–143 °C. IR: 2967 cm<sup>-1</sup>. <sup>1</sup>H NMR (400 MHz, CDCl<sub>3</sub>)  $\delta$ : 3.81 (3 H, s), 6.80 (1 H, d,  $J = 8.0$  Hz), 7.08 (1 H, d,  $J = 7.0$  Hz), 7.13 (1 H, dd,  $J = 8.0, 8.0$  Hz), 7.27 (1 H, dd,  $J = 8.0, 8.0$  Hz), 7.33–7.43 (3 H, m), 7.83 (1 H, d,  $J = 8.0$  Hz), 7.89 (1 H, d,  $J = 8.0$  Hz), 8.06 (1 H, d,  $J = 7.5$  Hz). <sup>13</sup>C NMR (100 MHz, CDCl<sub>3</sub>)  $\delta$ : 56.3, 110.4, 113.2, 116.3, 119.2, 121.1, 122.6, 123.4, 124.5, 128.2, 128.7, 131.4, 131.8, 137.2, 143.2, 153.7. HRMS (ESI, TOF) Calcd for C<sub>18</sub>H<sub>14</sub>BrN<sub>2</sub>O [M+H]<sup>+</sup>: 353.0290. Found: 353.0285. Rt: (DAICEL CHIRALCEL<sup>®</sup> OJ-H, hexane/*i*-PrOH = 5/1, 1.0 mL/min, 30 °C, 254 nm): 23.7 min (92%), 28.4 min (8%).

**(*rac*)-1-(2-Methoxynaphthalen-1-yl)-2-bromo-benzo[*d*]imidazole [(*rac*)-**3b**]:** Following the General Procedure II, a mixture of 2-bromo-benzimidazole (**1b**) (0.82 g, 4.0 mmol), 2-methoxynaphthalen boronic acid (**2**) (1.6 g, 8.0 mmol) and MnO<sub>2</sub> (3.5 g, 40 mmol) in the Stock Solution (B) [40 mL, 1.0 mmol (Cu), 2.0 mmol (TMEDA)] was stirred for 22 h at 25 °C. The crude material was purified by column chromatography on silica gel (hexane/EtOAc = 2:1) to afford the titled compound (*rac*)-**3b** as a colorless solid (1.0 g, 73% isolated yield). <sup>1</sup>H NMR spectra was identical with chiral one shown above. Rt: (DAICEL CHIRALCEL<sup>®</sup> OJ-H, hexane/*i*-PrOH = 5/1, 1.0 mL/min, 30 °C, 254 nm): 23.5 min (52%), 27.6 min (48%).

## HPLC data of 1-(2-methoxynaphthalen-1-yl)-2-bromo-benzo[*d*]imidazole (3b)

### 【PDA chromatograms】

(*rac*)-3b

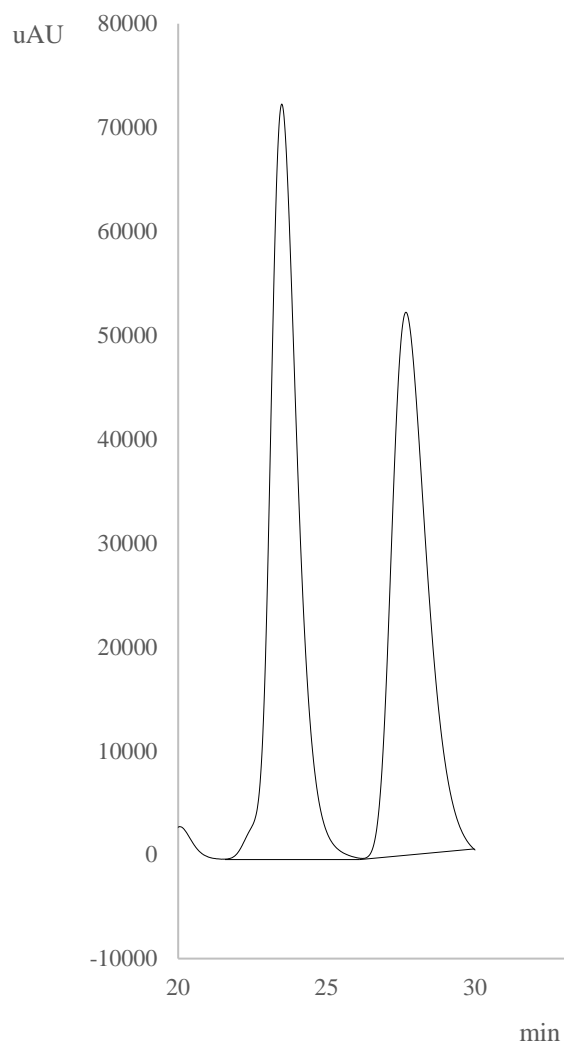

| Peak# | Ret. Time | Area    | Area% |
|-------|-----------|---------|-------|
| 1     | 23.49     | 4698333 | 52.12 |
| 2     | 27.63     | 4315837 | 47.88 |
| total |           | 9014204 | 100   |

(*S*)-3b

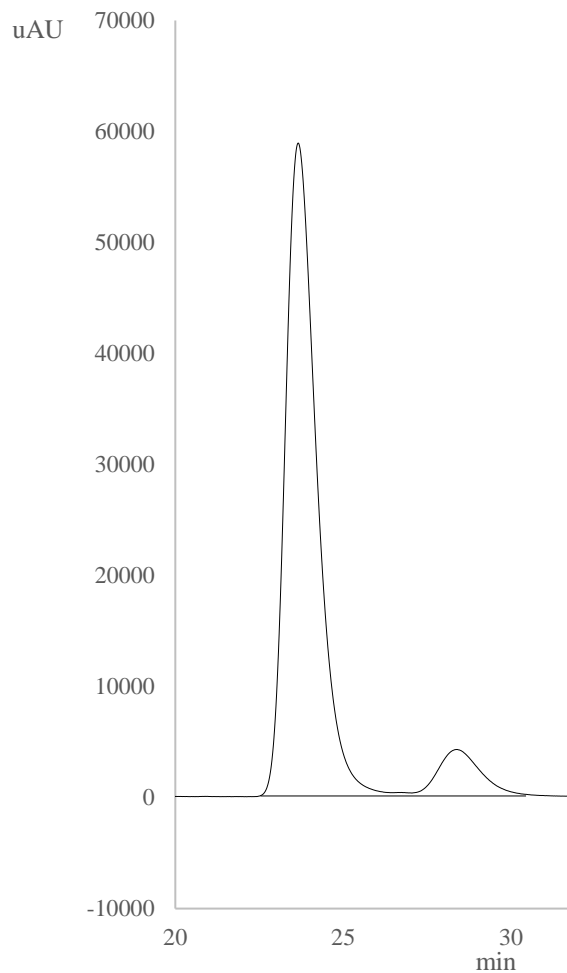

| Peak# | Ret. Time | Area    | Area% |
|-------|-----------|---------|-------|
| 1     | 23.66     | 3767734 | 92.05 |
| 2     | 28.38     | 325645  | 8     |
| total |           | 4093379 | 100   |

### 3-7. Large scale synthesis of 3b

#### 1-(2-Methoxynaphthalen-1-yl)-2-bromo-benzo[d]imidazole (3b)

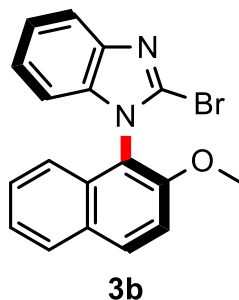

**(S)-1-(2-Methoxynaphthalen-1-yl)-2-bromo-benzo[d]imidazole [(S)-3b]:** Following the General Procedure I, a mixture of 2-bromo-benzimidazole (**1b**) (0.49 g, 2.5 mmol), 2-methoxynaphthalene boronic acid (**2a**) (1.0 g, 5.0 mmol) and MnO<sub>2</sub> (2.2 g, 25 mmol) in the chiral Stock Solution (A) [25 mL, 0.63 mmol (Cu), 1.25 mmol (**4j**)] was stirred for 22 h at 25 °C in 100 mL recovery flask. The crude material was purified by column chromatography on silica gel (hexane/EtOAc = 2:1) to afford the titled compound (S)-**3b** (0.77 g, 87% isolated yield, 86% ee) as a colorless solid. Rt: (DAICEL CHIRALCEL<sup>®</sup> OJ-H, hexane/EtOH/DEA = 90/10/0.1, 1.0 mL/min, 30 °C, 240 nm): 13.98 min (93%), 14.86 min (7%).

**HPLC data of 1-(2-Methoxynaphthalen-1-yl)-2-bromo-benzo[*d*]imidazole (3b) prepared in a large scale**

**【PDA chromatograms】**

*(rac)*-3b

*(S)*-3b

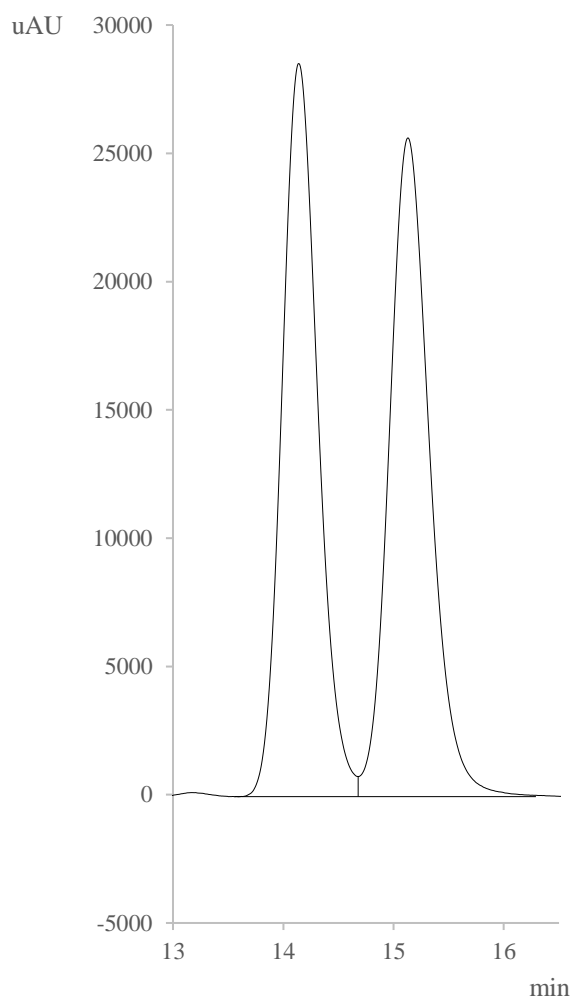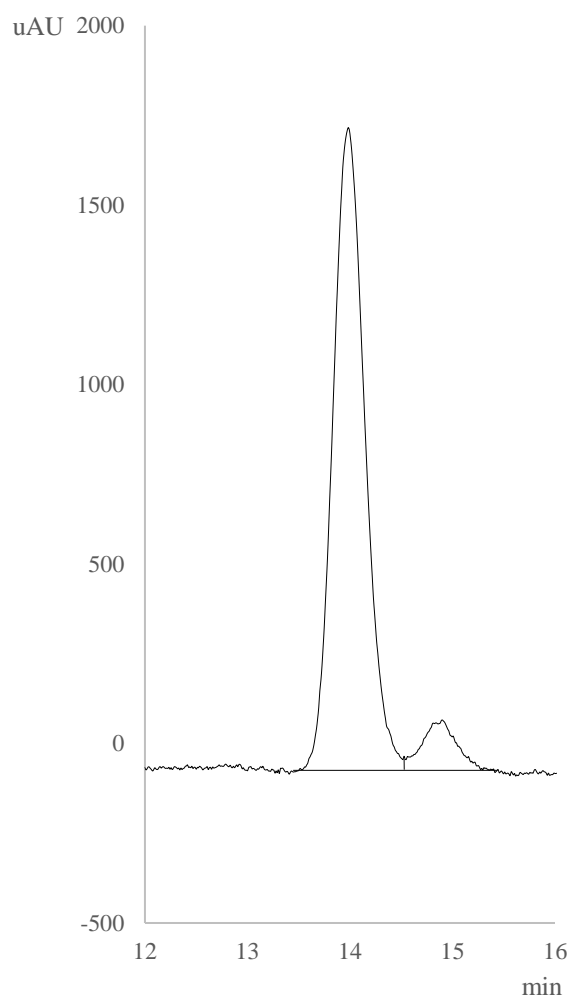

| Peak# | Ret. Time | Area    | Area% |
|-------|-----------|---------|-------|
| 1     | 14.134    | 646813  | 49.78 |
| 2     | 15.125    | 652606  | 50.22 |
| total |           | 1299419 | 100   |

| Peak# | Ret. Time | Area  | Area% |
|-------|-----------|-------|-------|
| 1     | 13.979    | 38821 | 92.63 |
| 2     | 14.895    | 3088  | 7.37  |
| total |           | 41909 | 100   |

### 1-(2-Methoxynaphthalen-1-yl)-2-methyl-benzo[*d*]imidazole (**3c**) (Table 3)

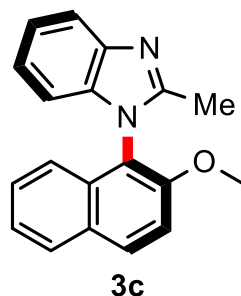

**(*R*)-1-(2-Methoxynaphthalen-1-yl)-2-methyl-benzo[*d*]imidazole [(*R*)-**3c**]:** Following the General Procedure I, a mixture of 2-methyl-benzimidazole (**1c**) (27 mg, 0.20 mmol), 2-methoxynaphthalene boronic acid (**2a**) (81 mg, 0.40 mmol) and MnO<sub>2</sub> (174 mg, 2.0 mmol) in the Stock Solution (A) [2.0 mL, 0.050 mmol (Cu), 0.10 mmol (**4j**)] was stirred for 22 h at 25 °C. The crude material was purified by column chromatography on silica gel (hexane/EtOAc = 2:1) to afford the titled compound (*R*)-**3c** (50 mg, 86% isolated yield, 48% ee) as a pale yellow solid.  $[\alpha]_{\text{D}}^{20} = -137.9$  (c 1.0, MeOH). Mp: 124–126 °C. IR: 2936 cm<sup>-1</sup>. <sup>1</sup>H NMR (400 MHz, CDCl<sub>3</sub>)  $\delta$ : 2.36 (3 H, s), 3.84 (3 H, s), 6.78 (1 H, d, *J* = 8.0 Hz), 7.07 (1 H, d, *J* = 8.0 Hz), 7.12 (1 H, dd, *J* = 7.5, 7.5 Hz), 7.28 (1 H, m), 7.35–7.43 (2 H, m), 7.45 (1 H, d, *J* = 9.0 Hz), 7.83 (1 H, d, *J* = 8.0 Hz), 7.92 (1 H, d, *J* = 8.0 Hz), 8.06 (1 H, d, *J* = 9.0 Hz). <sup>13</sup>C NMR (100 MHz, CDCl<sub>3</sub>)  $\delta$ : 13.7, 56.4, 110.2, 113.3, 116.8, 118.7, 121.4, 122.2, 122.5, 124.5, 128.23, 128.28, 129.0, 131.2, 131.4, 136.4, 142.3, 153.3, 153.4. HRMS (ESI, TOF) Calcd for C<sub>19</sub>H<sub>17</sub>N<sub>2</sub>O [M+H]<sup>+</sup>: 289.1341. Found: 289.1330. Rt: (DAICEL CHIRALCEL<sup>®</sup> OJ-H, hexane/*i*-PrOH = 90/10, 1.0 mL/min, 30 °C, 254 nm): 10.47 min (26%), 12.97 min (74%).

**(*rac*)-1-(2-Methoxynaphthalen-1-yl)-2-methyl-benzo[*d*]imidazole [(*rac*)-**3c**]:** Following the General Procedure II, a mixture of 2-methyl-benzimidazole (**1c**) (0.54 g, 4.0 mmol), 2-methoxynaphthalen boronic acid (**2a**) (1.6 g, 8.0 mmol) and MnO<sub>2</sub> (3.5 g, 40 mmol) in the Stock Solution (B) [40 mL, 1.0 mmol (Cu), 2.0 mmol (**4j**)] was stirred for 22 h at 25 °C. The crude material was purified by column chromatography on silica gel (hexane/EtOAc = 2:1) to afford the titled compound (*rac*)-**3c** as a pale yellow solid (0.72 g, 62% isolated yield). <sup>1</sup>H NMR spectra was identical with chiral one shown above. Rt: (DAICEL CHIRALCEL<sup>®</sup> OJ-H, hexane/*i*-PrOH = 90/10, 1.0 mL/min, 30 °C, 254 nm): 10.53 min (50%), 13.32 min (50%).

# HPLC data of 1-(2-methoxynaphthalen-1-yl)-2-methyl-benzo[d]imidazole (3c)

## 【PDA chromatograms】

(rac)-3c

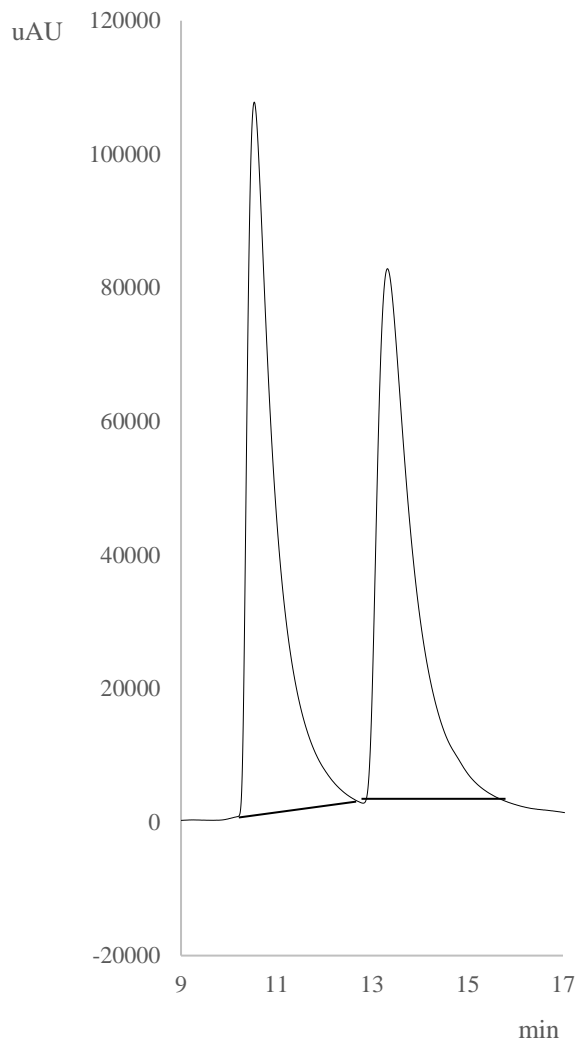

| Peak# | Ret. Time | Area    | Area%  |
|-------|-----------|---------|--------|
| 1     | 10.53     | 4591770 | 49.69  |
| 2     | 13.32     | 4651237 | 50.322 |
| total |           | 9243007 | 100    |

(R)-3c

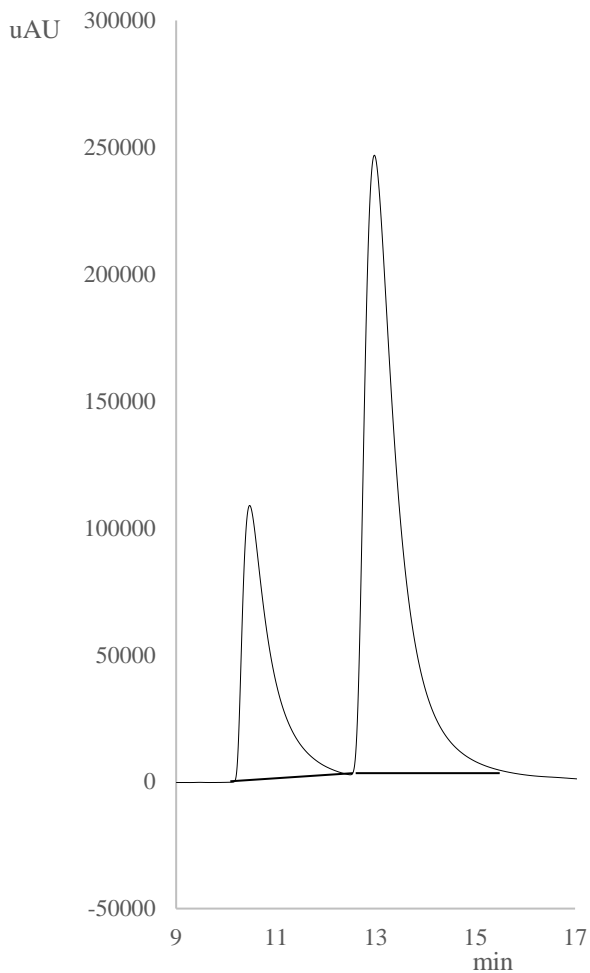

| Peak# | Ret. Time | Area     | Area% |
|-------|-----------|----------|-------|
| 1     | 10.47     | 4160106  | 26.15 |
| 2     | 12.97     | 11749153 | 73.85 |
| total |           | 15909259 | 100   |



### 1-(2-Methoxymethylnaphthalen-1-yl)-2-bromo-benzo[*d*]imidazole (**3d**) (Table 3)

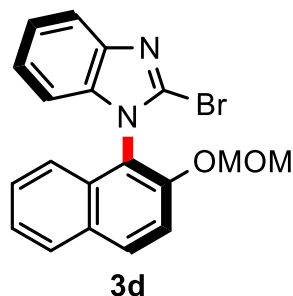

**(*S*)-1-(2-Methoxymethylnaphthalen-1-yl)-2-bromo-benzo[*d*]imidazole [(*S*)-**3d**]:** Following the General Procedure I, a mixture of 2-bromo-benzimidazole (**1b**) (41 mg, 0.20 mmol), 2-methoxymethylnaphthalene boronic acid (**2b**) (93 mg, 0.40 mmol) and MnO<sub>2</sub> (174 mg, 2.0 mmol) in the Stock Solution (A) [2.0 mL, 0.050 mmol (Cu), 0.10 mmol (**4j**)] was stirred for 22 h at 25 °C. The crude material was purified by column chromatography on silica gel (hexane/EtOAc = 2:1) to afford the titled compound (*S*)-**3d** (57 mg, 74% isolated yield, 90% ee) as a colorless solid.  $[\alpha]_{\text{D}}^{20} = +62.7$  (c 1.0, CHCl<sub>3</sub>). Mp: 144–145 °C. IR: 2941 cm<sup>-1</sup>. <sup>1</sup>H NMR (400 MHz, CDCl<sub>3</sub>)  $\delta$ : 3.30 (3 H, s), 5.18 (2 H, s), 6.85 (1 H, d,  $J = 8.0$  Hz), 7.12 (1 H, d,  $J = 8.0$  Hz), 7.17 (1 H, dd,  $J = 7.0, 7.0$  Hz), 7.30 (1 H, dd,  $J = 7.5, 7.5$  Hz), 7.40–7.48 (2 H, m), 7.63 (1 H, d,  $J = 9.0$  Hz), 7.84 (1 H, d,  $J = 8.0$  Hz), 7.93 (1 H, d,  $J = 7.5$  Hz), 8.07 (1 H, d,  $J = 9.0$  Hz). <sup>13</sup>C NMR (100 MHz, CDCl<sub>3</sub>)  $\delta$ : 56.4, 94.6, 110.5, 115.9, 117.6, 119.3, 121.5, 122.8, 123.5, 125.0, 128.2, 129.5, 131.4, 131.7, 135.4, 143.3, 151.7. HRMS (ESI, TOF) Calcd for C<sub>19</sub>H<sub>16</sub>BrN<sub>2</sub>O<sub>2</sub> [M+H]<sup>+</sup>: 383.0395. Found: 383.0385. Rt: (DAICEL CHIRALPAK<sup>®</sup> IB-N, hexane/*i*-PrOH = 98/2, 1.0 mL/min, 30 °C, 254 nm): 15.21 min (95%), 17.14 min (5%).

**(*rac*)-1-(2-Methoxymethylnaphthalen-1-yl)-2-bromo-benzo[*d*]imidazole [(*rac*)-**3d**]:** Following the General Procedure II, a mixture of 2-bromo-benzimidazole (**1b**) (49.3 mg, 0.25 mmol), 2-methoxymethylnaphthalen boronic acid (**2b**) (116 mg, 0.5 mmol) and MnO<sub>2</sub> (0.22 g, 2.5 mmol) in the Stock Solution (B) [2.0 mL, 0.063 mmol (Cu), 0.13 mmol (TMEDA)] was stirred for 22 h at 25 °C. The crude material was purified by column chromatography on silica gel (hexane/EtOAc = 2:1) to afford the titled compound (*rac*)-**3d** with impurity (59% GC yield). This mixture was triturated to afford the pure titled compound (*rac*)-**3d** as a colorless solid (11 mg, 12% isolated yield). <sup>1</sup>H NMR spectra was identical with chiral one shown above. Rt: (DAICEL CHIRALPAK<sup>®</sup>

IB-N, hexane/*i*-PrOH = 98/2, 1.0 mL/min, 30 °C, 254 nm): 13.7 min (51%), 15.37 min (49%).

### HPLC data of 1-(2-methoxymethylnaphthalen-1-yl)-2-bromo-benzo[*d*]imidazole (3d)

#### 【PDA chromatograms】

(*rac*)-3d

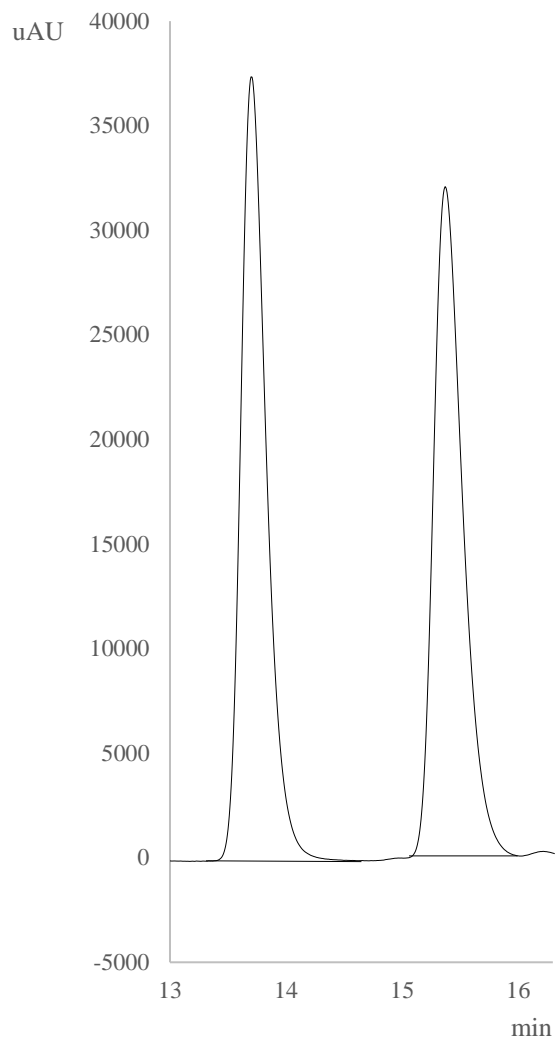

| Peak# | Ret. Time | Area    | Area% |
|-------|-----------|---------|-------|
| 1     | 13.7      | 577356  | 50.52 |
| 2     | 15.37     | 565517  | 49.48 |
| total |           | 1142873 | 100   |

(*S*)-3d

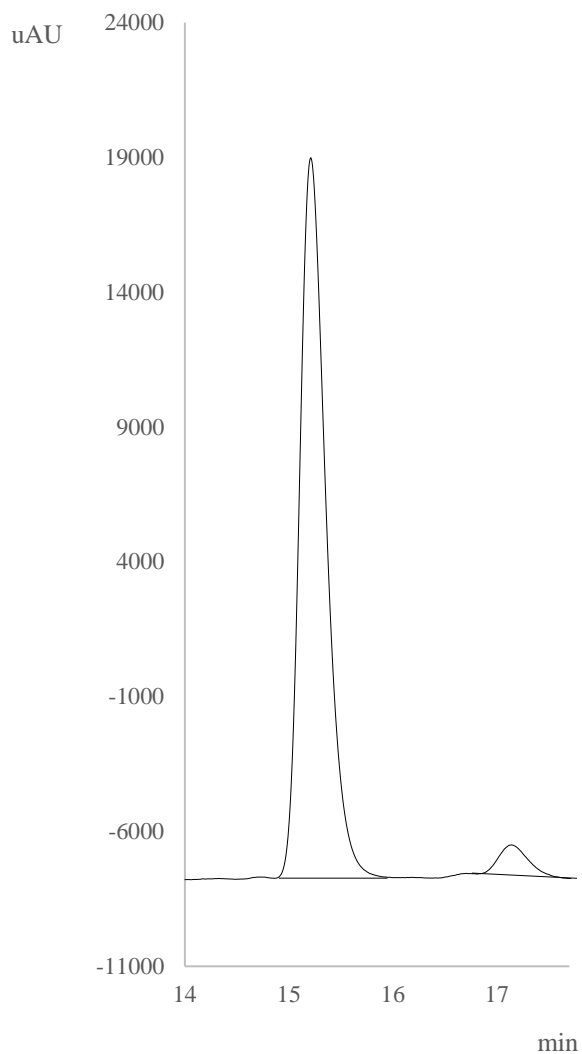

| Peak# | Ret. Time | Area   | Area% |
|-------|-----------|--------|-------|
| 1     | 15.21     | 469179 | 95.43 |
| 2     | 17.14     | 22457  | 4.57  |
| total |           | 491636 | 100   |

### 1-(2-Methoxymethylnaphthalen-1-yl)-2-chloro-benzo[*d*]imidazole (**3e**)

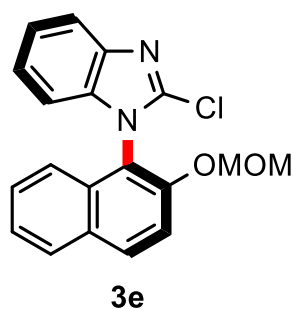

**(*S*)-1-(2-Methoxymethylnaphthalen-1-yl)-2-chloro-benzo[*d*]imidazole [(*S*)-**3e**]:** Following the General Procedure I, a mixture of 2-chloro-benzimidazole (**1a**) (31 mg, 0.20 mmol), 2-methoxymethylnaphthalene boronic acid (**2b**) (93 mg, 0.40 mmol) and MnO<sub>2</sub> (0.17 g, 20 mmol) in the Stock Solution (A) [2.0 mL, 0.050 mmol (Cu), 0.10 mmol (**4j**)] was stirred for 22 h at 25 °C. The crude material was purified by column chromatography on silica gel (hexane/EtOAc = 2:1) to afford the titled compound (*S*)-**3e** (47 mg, 80% isolated yield, 78% ee) as a colorless solid.  $[\alpha]_D^{20} = +94.8$  (c 1.0, CHCl<sub>3</sub>). Mp: 162–163 °C. IR: 2917 cm<sup>-1</sup>. <sup>1</sup>H NMR (400 MHz, CDCl<sub>3</sub>)  $\delta$ : 3.29 (3 H, s), 5.18 (2 H, s), 6.83 (1 H, d,  $J = 8.0$  Hz), 7.14–7.21 (2 H, m), 7.32 (1 H, dd,  $J = 7.5, 7.5$  Hz), 7.40–7.48 (2 H, m), 7.63 (1 H, d,  $J = 9.0$  Hz), 7.83 (1 H, d,  $J = 8.0$  Hz), 7.93 (1 H, d,  $J = 7.5$  Hz), 8.06 (1 H, d,  $J = 9.0$  Hz). <sup>13</sup>C NMR (100 MHz, CDCl<sub>3</sub>)  $\delta$ : 56.3, 94.7, 110.4, 115.9, 116.9, 119.4, 121.4, 122.9, 123.5, 125.0, 128.21, 128.27, 129.5, 131.4, 131.7, 136.8, 142.0, 142.2, 151.7. HRMS (ESI, TOF) Calcd for C<sub>19</sub>H<sub>16</sub>ClN<sub>2</sub>O<sub>2</sub> [M+H]<sup>+</sup>: 339.0900. Found: 399.0891. Rt: (DAICEL CHIRALCEL<sup>®</sup> OJ-H, hexane/*i*-PrOH = 90/10, 1.0 mL/min, 30 °C, 254 nm): 12.16 min (89%), 15.39 min (11%).

**(*rac*)-1-(2-Methoxymethylnaphthalen-1-yl)-2-chloro-benzo[*d*]imidazole [(*rac*)-**3e**]:** Following the General Procedure II, a mixture of 2-chloro-benzimidazole (**1a**) (38 mg, 0.25 mmol), 2-methoxymethylnaphthalen boronic acid (**2b**) (0.11 g, mmol) and MnO<sub>2</sub> (0.22 g, 25 mmol) in the Stock Solution (B) [2.5 mL, 0.063 mmol (Cu), 1.3 mmol (**4j**)] was stirred for 22 h at 25 °C. The crude material was purified by column chromatography on silica gel (hexane/EtOAc = 2:1) to afford the titled compound (*rac*)-**3e** with impurity (47% GC yield). This mixture was triturated to afford the pure titled compound (*rac*)-**3e** as a colorless solid (10 mg, 12% isolated yield). <sup>1</sup>H NMR spectra was identical with chiral one shown above. Rt: (DAICEL CHIRALCEL<sup>®</sup> OJ-H, hexane/*i*-

PrOH = 90/10, 1.0 mL/min, 30 °C, 254 nm): 12.08 min (50%), 15.26 min (50%).

### HPLC data of 1-(2-methoxymethylnaphthalen-1-yl)-2-chloro-benzo[*d*]imidazole (3e)

#### 【PDA chromatograms】

(*rac*)-3e

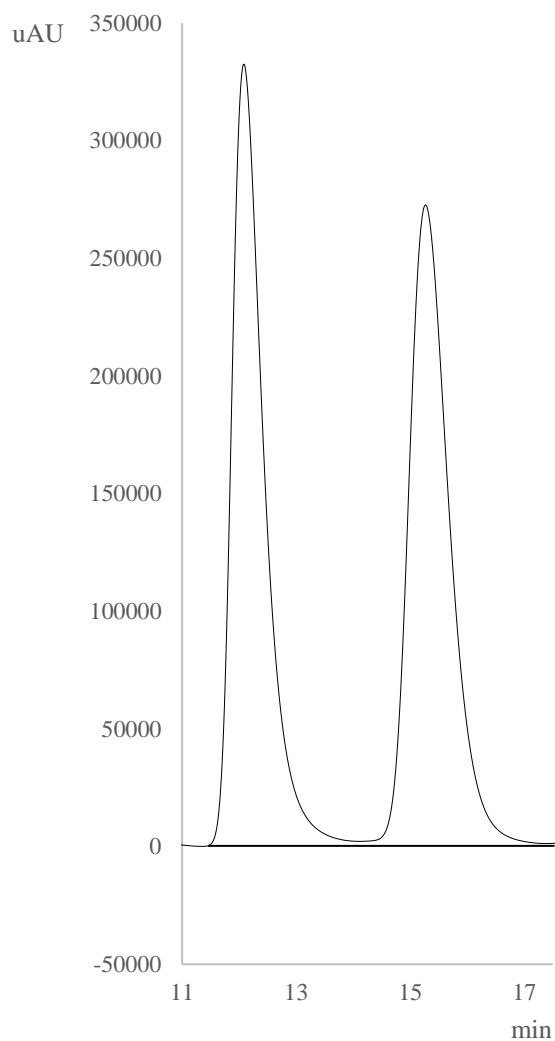

| Peak# | Ret. Time | Area     | Area% |
|-------|-----------|----------|-------|
| 1     | 12.08     | 13141571 | 49.62 |
| 2     | 15.26     | 13340674 | 50.38 |
| total |           | 26482245 | 100   |

(*S*)-3e

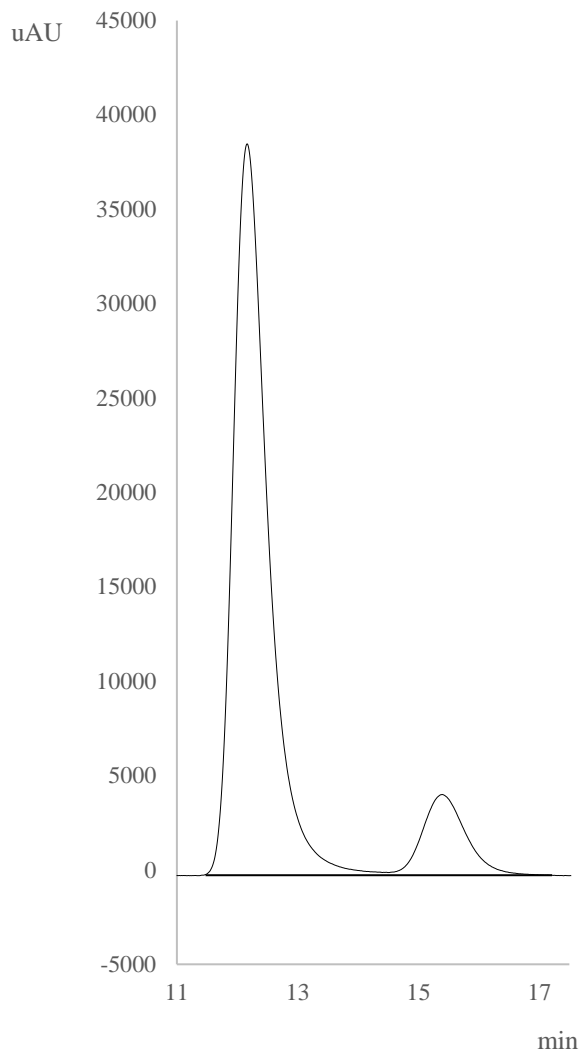

| Peak# | Ret. Time | Area    | Area% |
|-------|-----------|---------|-------|
| 1     | 12.16     | 1538944 | 88.7  |
| 2     | 15.39     | 196112  | 11.3  |
| total |           | 1735056 | 100   |

### Naphthalen-1-yl-2-bromo-benzo[*d*]imidazole (**3f**) (Table 3)

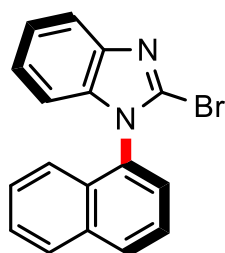

**3f**

**(*R*)-Naphthalen-1-yl-2-bromo-benzo[*d*]imidazole [(*S*)-**3f**]:** Following the General Procedure I, a mixture of 2-bromo-benzimidazole (**1b**) (41 mg, 0.20 mmol), 1-naphthalene boronic acid (**2c**) (69 mg, 0.40 mmol) and MnO<sub>2</sub> (174 mg, 2.0 mmol) in the Stock Solution (A) [2.0 mL, 0.050 mmol (Cu), 0.10 mmol (**4j**)] was stirred for 22 h at 25 °C. The crude material was purified by column chromatography on silica gel (hexane/EtOAc = 2:1) to afford the titled compound (*R*)-**3f** (65 mg, quant, 52% ee) as a colorless solid.  $[\alpha]_D^{20} = -52.9$  (c 1.0, MeOH). Mp: 124–125 °C. IR: 2931 cm<sup>-1</sup>. <sup>1</sup>H NMR (400 MHz, CDCl<sub>3</sub>)  $\delta$ : 6.86 (1 H, d,  $J = 8.0$  Hz), 7.15–7.20 (2 H, m), 7.31 (1 H, dd,  $J = 7.5, 7.5$  Hz), 7.43 (1 H, dd,  $J = 7.5, 7.5$  Hz), 7.52–7.59 (2 H, m), 7.64 (1 H, dd,  $J = 8.0, 8.0$  Hz), 7.86 (1 H, d,  $J = 8.0$  Hz), 8.00 (1 H, d,  $J = 8.0$  Hz), 8.09 (1 H, d,  $J = 8.0$  Hz). <sup>13</sup>C NMR (100 MHz, CDCl<sub>3</sub>)  $\delta$ : 110.5, 119.3, 122.3, 123.0, 123.7, 125.4, 126.9, 127.0, 127.7, 128.5, 130.1, 130.4, 130.9, 131.6, 134.3, 137.9, 143.0. HRMS (ESI, TOF) Calcd for C<sub>17</sub>H<sub>12</sub>BrN<sub>2</sub> [M+H]<sup>+</sup>: 323.0184. Found: 323.0175. Rt: (DAICEL CHIRALPAK<sup>®</sup> IC, hexane/*i*-PrOH = 98/2, 1.0 mL/min, 30 °C, 254 nm): 24.90 min (76%), 26.36 min (24%).

**(*rac*)-Naphthalen-1-yl-2-bromo-benzo[*d*]imidazole [(*rac*)-**3f**]:** Following the General Procedure II, a mixture of 2-bromo-benzimidazole (**1b**) (0.82 g, 4.0 mmol), 1-naphthalene boronic acid (**2c**) (1.4 g, 8.0 mmol) and MnO<sub>2</sub> (3.5 g, 40 mmol) in the Stock Solution (B) [40 mL, 1.0 mmol (Cu), 2.0 mmol (TMEDA)] was stirred for 22 h at 25 °C. The crude material was purified by column chromatography on silica gel (hexane/EtOAc = 2:1) to afford the titled compound (*rac*)-**3f** as a colorless solid (1.0 g, 76% isolated yield). <sup>1</sup>H NMR spectra was identical with chiral one shown above. Rt: (DAICEL CHIRALPAK<sup>®</sup> IC, hexane/*i*-PrOH = 98/2, 1.0 mL/min, 30 °C, 254 nm): 25.99 min (50%), 27.56 min (50%).

# HPLC data of naphthalen-1-yl-2-bromo-benzo[*d*]imidazole (3f)

## 【PDA chromatograms】

(*rac*)-3f

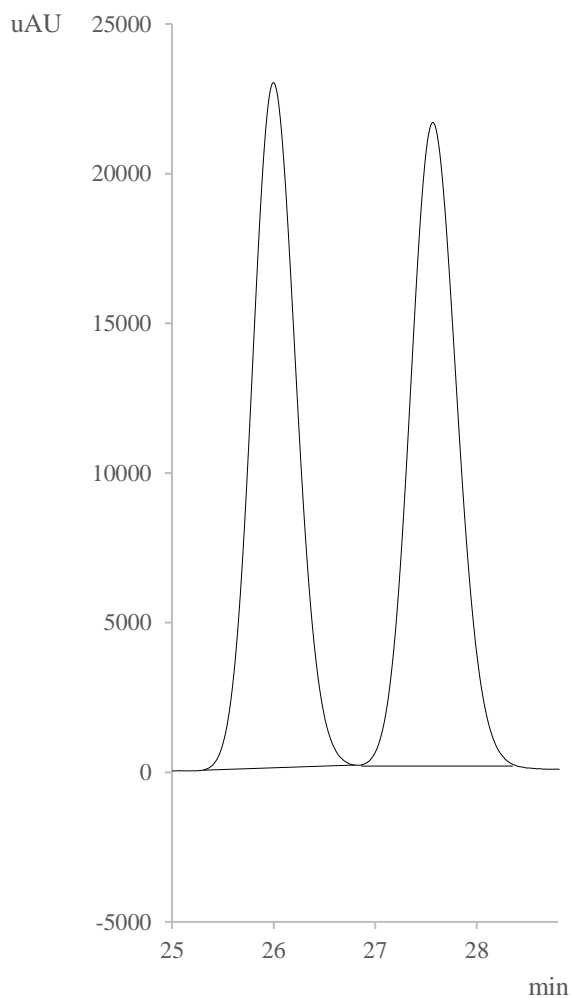

| Peak# | Ret. Time | Area    | Area% |
|-------|-----------|---------|-------|
| 1     | 25.993    | 716328  | 49.89 |
| 2     | 27.563    | 719410  | 50.11 |
| total |           | 1435738 | 100   |

(*R*)-3f

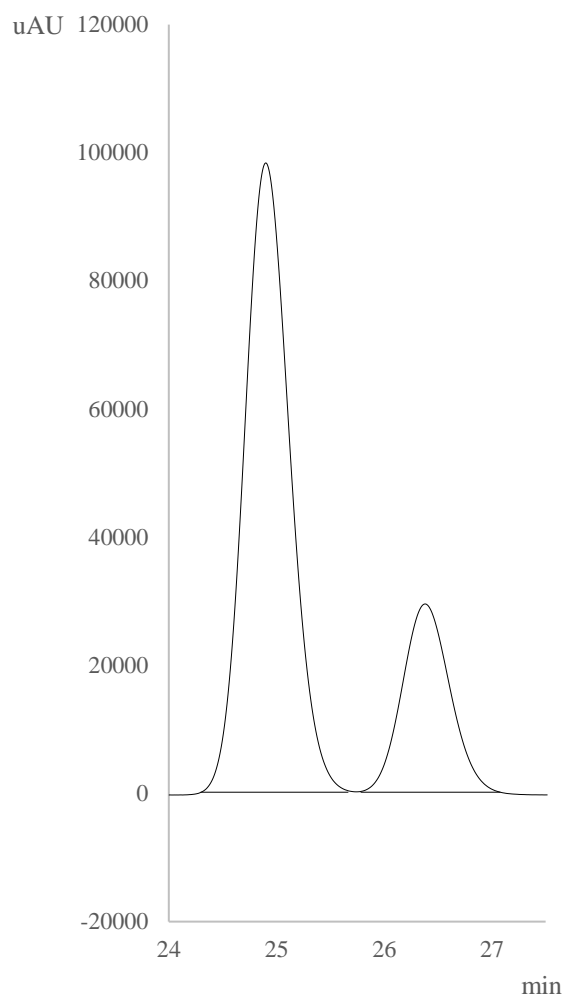

| Peak# | Ret. Time | Area    | Area% |
|-------|-----------|---------|-------|
| 1     | 24.895    | 2937619 | 75.77 |
| 2     | 26.375    | 940091  | 24.24 |
| total |           | 3877710 | 100   |

**Phenanthrene-1-yl-2-bromo-benzo[*d*]imidazole (3g) (Table 3)**

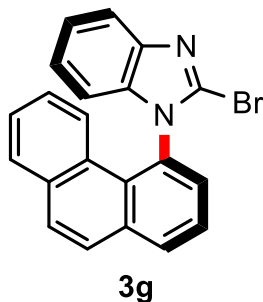

**(*R*)-Phenanthrene-1-yl-2-bromo-benzo[*d*]imidazole [(*R*)-3g]:** Following the General Procedure I, a mixture of 2-bromo-benzimidazole (**1b**) (41 mg, 0.20 mmol), phenanthrene boronic acid (**2d**) (89 mg, 0.40 mmol) and MnO<sub>2</sub> (0.17 g, 2.0 mmol) in the Stock Solution (A) [2.0 mL, 0.050 mmol (Cu), 0.10 mmol (**4j**)] was stirred for 22 h at 25 °C. The crude material was purified by column chromatography on silica gel (hexane/EtOAc = 2:1) to afford the titled compound (*R*)-**3g** (31 mg, 42% isolated yield, 60% ee) as a colorless solid.  $[\alpha]_D^{20} = -6.7$  (c 0.84, MeOH). Mp: 164–167 °C. IR: 3052 cm<sup>-1</sup>. <sup>1</sup>H NMR (400 MHz, CDCl<sub>3</sub>) δ: 6.77 (1 H, d, *J* = 11.0 Hz), 6.93 (1 H, d, *J* = 10.0 Hz), 7.14–7.20 (2 H, m), 7.35 (1 H, dd, *J* = 8.0, 8.0 Hz), 7.47–7.54 (2 H, m), 7.75 (1 H, dd, *J* = 8.0, 8.0 Hz), 7.83–7.92 (4 H, m), 8.16 (1 H, d, *J* = 10.0 Hz). <sup>13</sup>C NMR (100 MHz, CDCl<sub>3</sub>) δ: 110.9, 119.5, 123.3, 124.0, 124.3, 126.5, 126.9, 127.2, 127.5, 127.6, 128.1, 128.9, 129.1, 129.8, 130.3, 131.5, 131.8, 133.2, 134.7, 136.7, 143.6. HRMS (ESI, TOF) Calcd for C<sub>21</sub>H<sub>14</sub>BrN<sub>2</sub>O [M+H]<sup>+</sup>: 373.0340. Found: 373.0342. Rt: (DAICEL CHIRALCEL<sup>®</sup> OJ-H, hexane/EtOH/Et<sub>2</sub>NH = 90/10/0.1, 1.0 mL/min, 30 °C, 254 nm): 12.22 min (80%), 14.84 min (20%).

**(*rac*)-Phenanthrene-1-yl-2-bromo-benzo[*d*]imidazole [(*rac*)-3g]:** Following the General Procedure II, a mixture of 2-bromo-benzimidazole (**1b**) (82 mg, 0.4 mmol), phenanthrene boronic acid (**2d**) (0.18 g, 0.80 mmol) and MnO<sub>2</sub> (3.5 g, 40 mmol) in the Stock Solution (B) [4.0 mL, 0.10 mmol (Cu), 0.20 mmol ((±)-**4j**)] was stirred for 22 h at 25 °C. The crude material was purified by column chromatography on silica gel (hexane/EtOAc = 2:1) to afford the titled compound (*rac*)-**3g** as a colorless solid (55 mg, 37 % isolated yield). <sup>1</sup>H NMR spectra was identical with chiral one shown above. Rt: (DAICEL CHIRALCEL<sup>®</sup> OJ-H, hexane/EtOH/Et<sub>2</sub>NH = 90/10/0.1, 1.0 mL/min, 30 °C, 254 nm): 12.31 min (50%), 14.95 min (50%).

# HPLC data of phenanthrene -yl-2-bromo-benzo[*d*]imidazole (3g)

## 【PDA chromatograms】

(*rac*)-3g

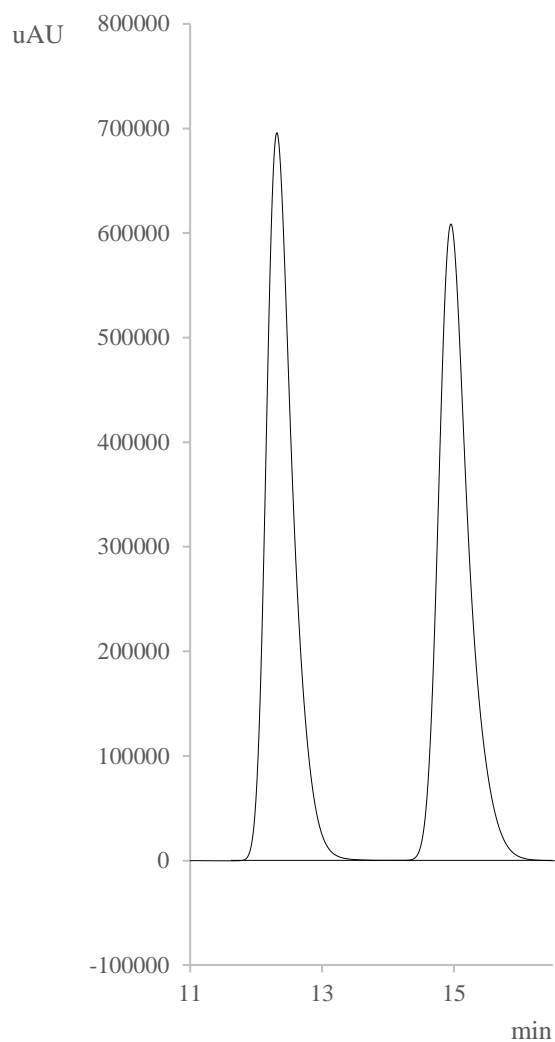

| Peak# | Ret. Time | Area     | Area% |
|-------|-----------|----------|-------|
| 1     | 12.31     | 19664757 | 50.12 |
| 2     | 14.95     | 19548723 | 49.85 |
| total |           | 39213480 | 100   |

(*R*)-3g

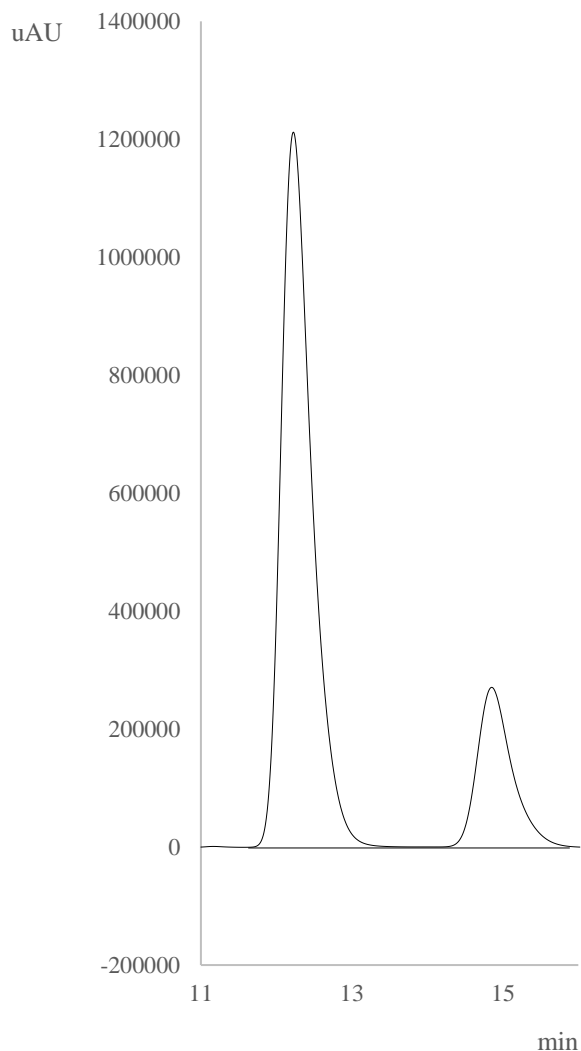

| Peak# | Ret. Time | Area     | Area% |
|-------|-----------|----------|-------|
| 1     | 12.22     | 34585404 | 79.94 |
| 2     | 14.84     | 8680964  | 20.06 |
| total |           | 43266368 | 100   |



**1-(2-Methoxynaphthalen-1-yl)-2-phenyl-benzo[*d*]imidazole (3h) (Table 3)**

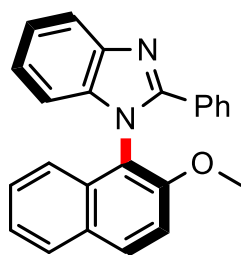

**3h**

**(*S*)-1-(2-Methoxynaphthalen-1-yl)-2-phenyl-benzo[*d*]imidazole [(*S*)-3h]:** Following the General Procedure I, a mixture of 2-phenyl-benzimidazole (**1d**) (39 mg, 0.20 mmol), 2-methoxynaphthalene boronic acid (**2a**) (81 mg, 0.40 mmol) and MnO<sub>2</sub> (174 mg, 2.0 mmol) in the Stock Solution (A) [2.0 mL, 0.050 mmol (Cu), 0.10 mmol (**4j**)] was stirred for 22 h at 25 °C. The crude material was purified by column chromatography on silica gel (hexane/EtOAc = 2:1) to afford the titled compound (*S*)-**3h** (31 mg, 44% isolated yield, 52% ee) as a pale yellow oil. [ $\alpha$ ]<sub>D</sub><sup>20</sup> = +47.8 (c 1.0, MeOH). IR: 2929 cm<sup>-1</sup>. <sup>1</sup>H NMR (400 MHz, CDCl<sub>3</sub>)  $\delta$ : 3.58 (3 H, s), 6.82 (1 H, d, *J* = 8.0 Hz), 7.15–7.19 (3 H, m), 7.24 (1 H, d, *J* = 7.0 Hz), 7.30–7.36 (3 H, m), 7.39–7.44 (2 H, m), 7.54 (2 H, d, *J* = 8.0 Hz), 7.90–7.93 (1 H, m), 7.96 (1 H, d, *J* = 8.0 Hz), 8.01 (1 H, d, *J* = 9.0 Hz). <sup>13</sup>C NMR (100 MHz, CDCl<sub>3</sub>)  $\delta$ : 110.8, 113.6, 118.7, 119.7, 121.8, 122.6, 123.0, 124.5, 128.0, 128.2, 128.3, 129.0, 129.3, 130.5, 131.0, 131.4, 137.4, 143.3, 153.0, 154.3. HRMS (ESI, TOF) Calcd for C<sub>24</sub>H<sub>19</sub>N<sub>2</sub>O [M+H]<sup>+</sup>: 351.1497. Found: 351.1498. Rt: (DAICEL CHIRALPAK<sup>®</sup> IK-3, hexane/*i*-PrOH = 95/5, 1.0 mL/min, 30 °C, 254 nm): 21.57 min (24%), 25.94 min (76%).

**(*rac*)-1-(2-Methoxynaphthalen-1-yl)-2-phenyl-benzo[*d*]imidazole [(*rac*)-3h]:** Following the General Procedure II, a mixture of 2-phenyl-benzimidazole (**1d**) (78 mg, 0.40 mmol), 2-methoxynaphthalen boronic acid (**2a**) (1.6 g, 8.0 mmol) and MnO<sub>2</sub> (0.35 g, 0.80 mmol) in the racemic Stock Solution (B) of [4.0 mL, 0.10 mmol (Cu), 0.20 mmol (( $\pm$ )-**4j**)] was stirred for 22 h at 25 °C. The crude material was purified by column chromatography on silica gel (hexane/EtOAc = 2:1) to afford the titled compound (*rac*)-**3h** as a colorless solid (56 mg, 40% isolated yield). <sup>1</sup>H NMR spectra was identical with chiral one shown above. Rt: (DAICEL CHIRALPAK<sup>®</sup> IK-3, hexane/*i*-PrOH = 95/5, 1.0 mL/min, 30 °C, 254 nm): 21.54 min (50%), 26 min (50%).

# HPLC data of 1-(2-methoxynaphthalen-1-yl)-2-phenyl-benzo[*d*]imidazole (3h)

## 【PDA chromatograms】

(*rac*)-3h

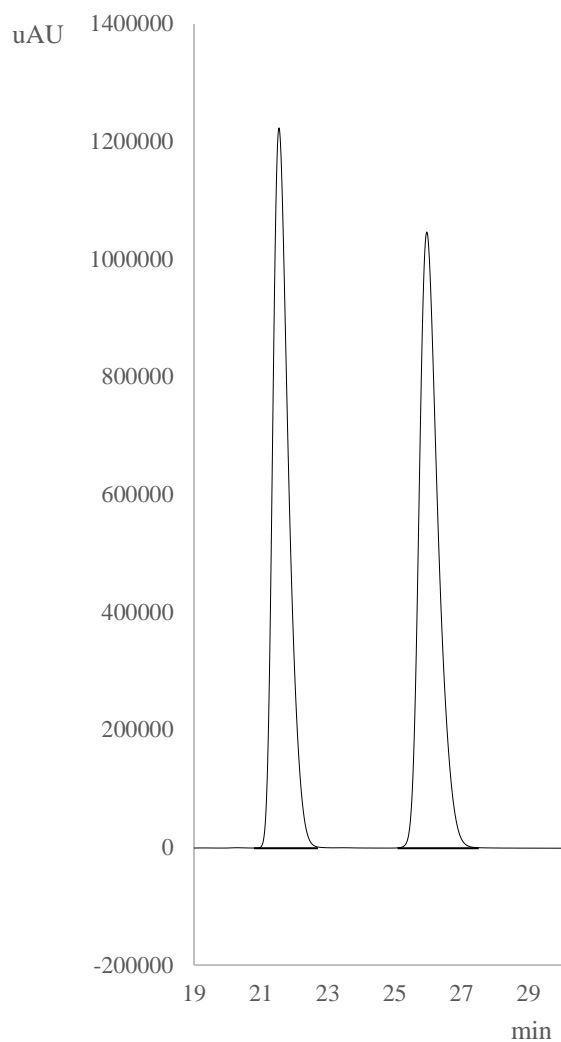

| Peak# | Ret. Time | Area     | Area% |
|-------|-----------|----------|-------|
| 1     | 21.54     | 40655573 | 49.6  |
| 2     | 26        | 41391469 | 50.4  |
| total |           | 82047042 | 100   |

(*S*)-3h

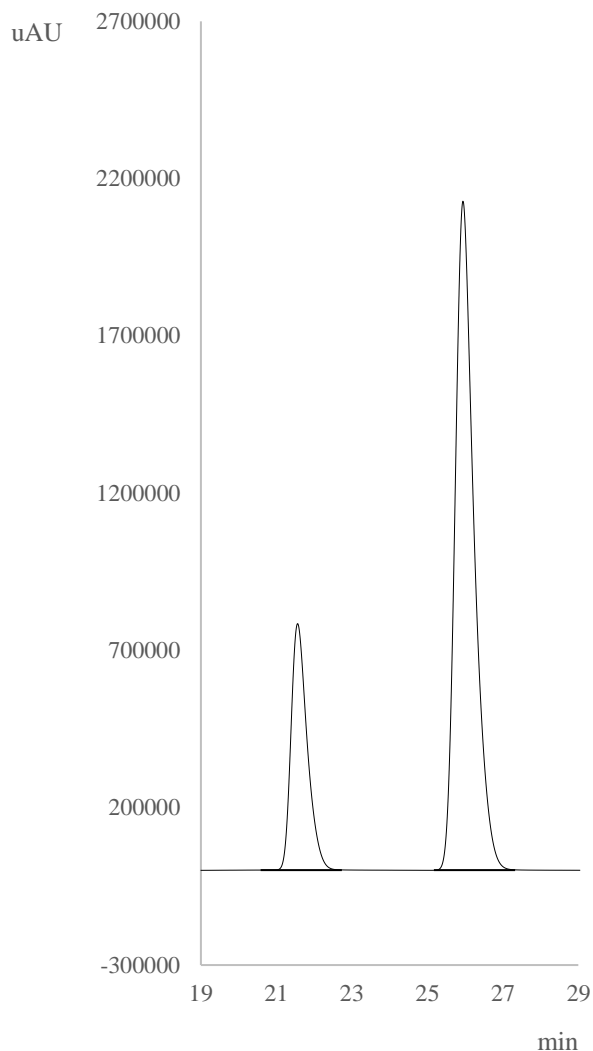

| Peak# | Ret. Time | Area     | Area% |
|-------|-----------|----------|-------|
| 1     | 21.57     | 23420609 | 24    |
| 2     | 25.94     | 74005726 | 76    |
| total |           | 97426335 | 100   |

### 1-(2-Methoxynaphthalen-1-yl)-2-thiomethyl-benzo[d]imidazole (**3i**) (Table 3)

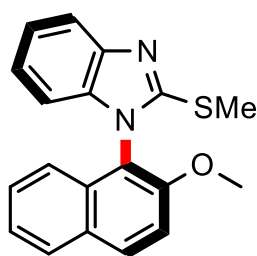

**3i**

**(S)-1-(2-Methoxynaphthalen-1-yl)-2-thiomethyl-benzo[d]imidazole [(S)-**3i**]:** Following the General Procedure I, a mixture of 2-thiomethyl-benzimidazole (**1e**) (34 mg, 0.20 mmol), 2-methoxynaphthalene boronic acid (**2a**) (81 mg, 0.40 mmol) and MnO<sub>2</sub> (174 mg, 2.0 mmol) in the Stock Solution (A) [2.0 mL, 0.050 mmol (Cu), 0.10 mmol (**4j**)] was stirred for 22 h at 25 °C. The crude material was purified by column chromatography on silica gel (hexane/EtOAc = 2:1) to afford the titled compound (*S*)-**3i** (51 mg, 80% isolated yield, 46% ee) as a colorless solid.  $[\alpha]_{\text{D}}^{20} = +30.1$  (c 0.92, MeOH). Mp: 139–142 °C. IR: 2930 cm<sup>-1</sup>. <sup>1</sup>H NMR (400 MHz, CDCl<sub>3</sub>)  $\delta$ : 2.73 (3 H, s), 3.86 (3 H, s), 6.77 (1 H, d,  $J = 8.0$  Hz), 7.07–7.14 (2 H, m), 7.26 (1 H, dd,  $J = 8.0, 8.0$  Hz), 7.37–7.43 (2 H, m), 7.45 (1 H, d,  $J = 9.0$  Hz), 7.82 (1 H, d,  $J = 8.0$  Hz), 7.89–7.92 (1 H, m), 8.06 (1 H, d,  $J = 9.0$  Hz). <sup>13</sup>C NMR (100 MHz, CDCl<sub>3</sub>)  $\delta$ : 14.4, 56.6, 109.4, 113.6, 116.0, 118.0, 121.6, 121.9, 122.0, 124.5, 128.0, 128.2, 129.0, 131.6, 131.6, 137.9, 143.8, 154.1, 155.0. HRMS (ESI, TOF) Calcd for C<sub>19</sub>H<sub>17</sub>N<sub>2</sub>OS [M+H]<sup>+</sup>: 321.1062. Found: 321.1046. Rt: (DAICEL CHIRALCEL<sup>®</sup> OJ-H, hexane/*i*-PrOH = 90/10, 1.0 mL/min, 30 °C, 254 nm): 16.11 min (27%), 19.66 min (73%).

**(rac)-1-(2-Methoxynaphthalen-1-yl)-2-thiomethyl-benzo[d]imidazole [(rac)-**3i**]:** Following the General Procedure II, a mixture of 2-bromo-benzimidazole (**1e**) (26 mg, 0.16 mmol), 2-methoxynaphthalen boronic acid (**2a**) (65 mg, 0.32 mmol) and MnO<sub>2</sub> (0.14 g, 1.6 mmol) in the Stock Solution (B) [2.0 mL, 0.050 mmol (Cu), 0.10 mmol (TMEDA)] was stirred for 22 h at 25 °C. The crude material was purified by column chromatography on silica gel (hexane/EtOAc = 2:1) to afford the titled compound (*rac*)-**3i** as a colorless solid (28 mg, 54% isolated yield). <sup>1</sup>H NMR spectra was identical with chiral one shown above. Rt: (DAICEL CHIRALCEL<sup>®</sup> OJ-H, hexane/*i*-PrOH = 90/10, 1.0 mL/min, 30 °C, 254 nm): 15.63 min (49%), 19.09 min (51%).

## HPLC data of 1-(2-methoxynaphthalen-1-yl)-2-thiomethyl-benzo[*d*]imidazole (3i)

### 【PDA chromatograms】

(*rac*)-3i

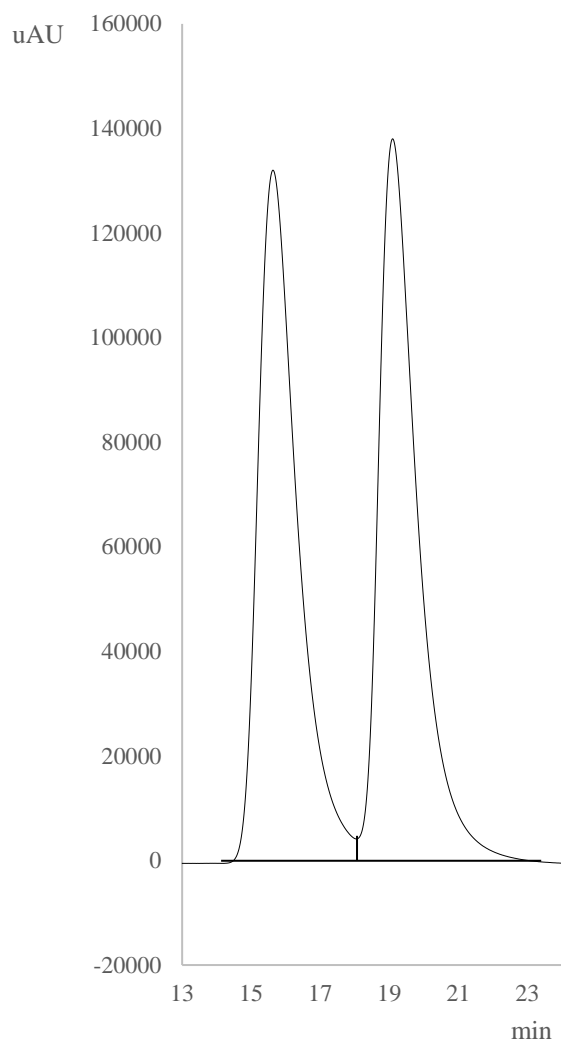

| Peak# | Ret. Time | Area     | Area% |
|-------|-----------|----------|-------|
| 1     | 15.63     | 10585204 | 49.21 |
| 2     | 19.09     | 10926354 | 50.79 |
| total |           | 21511558 | 100   |

(*S*)-3i

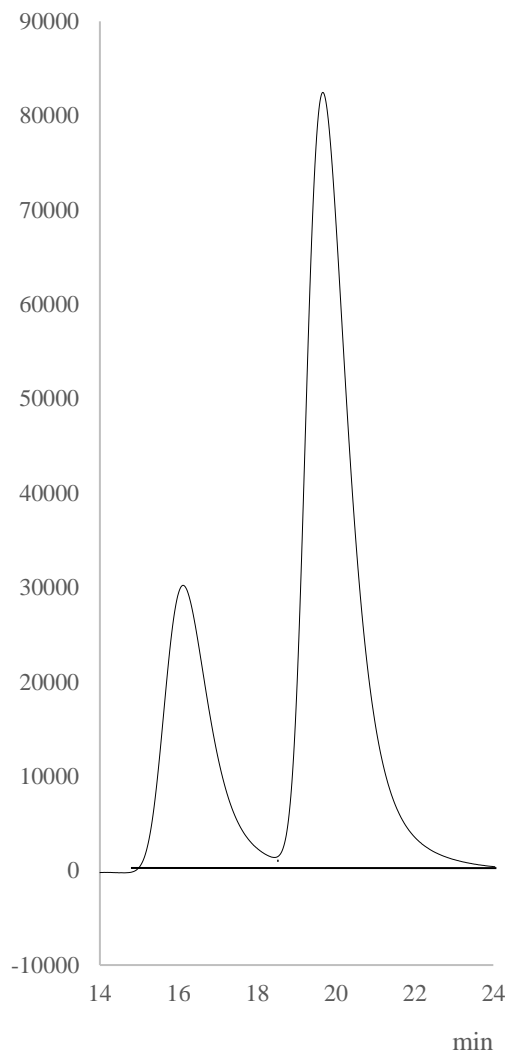

| Peak# | Ret. Time | Area    | Area% |
|-------|-----------|---------|-------|
| 1     | 16.11     | 2584025 | 27.28 |
| 2     | 19.66     | 6887329 | 72.72 |
| total |           | 9471354 | 100   |

### 1-(2-Chlorophenyl-1-yl)-2-bromo-benzo[*d*]imidazole (**3j**) (Table 3)

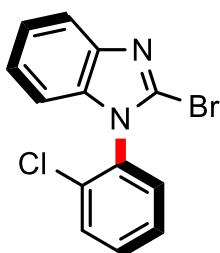

**3j**

**(-)-1-(2-Chlorophenyl-1-yl)-2-bromo-benzo[*d*]imidazole [(-)-**3j**]:** Following the General Procedure I, a mixture of 2-bromo-benzimidazole (**1b**) (41 mg, 0.20 mmol), 2-chlorophenyl boronic acid (**2e**) (64 mg, 0.40 mmol) and MnO<sub>2</sub> (174 mg, 2.0 mmol) in the Stock Solution (A) [2.0 mL, 0.050 mmol (Cu), 0.10 mmol (**4j**)] was stirred for 22 h at 25 °C. The crude material was purified by column chromatography on silica gel (hexane/EtOAc = 2:1) to afford the titled compound (-)-**3j** (62 mg, quant, 80% ee) as a pale yellow oil.  $[\alpha]_D^{20} = -11.2$  (c 0.98, MeOH). IR: 3059 cm<sup>-1</sup>. <sup>1</sup>H NMR (400 MHz, CDCl<sub>3</sub>)  $\delta$ : 6.97 (1 H, d,  $J = 8.0$  Hz), 7.24 (1 H, dd,  $J = 7.5, 7.5$  Hz), 7.30 (1 H, dd,  $J = 7.5, 7.5$  Hz), 7.42 (1 H, d,  $J = 8.0$  Hz), 7.49 (1 H, dd,  $J = 7.5, 7.5$  Hz), 7.55 (1 H, dd,  $J = 8.0, 8.0$  Hz), 7.65 (1 H, d,  $J = 8.0$  Hz), 7.79 (1 H, d,  $J = 8.0$  Hz). <sup>13</sup>C NMR (100 MHz, CDCl<sub>3</sub>)  $\delta$ : 110.1, 119.4, 123.1, 123.8, 128.1, 129.9, 130.5, 130.8, 131.3, 132.9, 133.5, 136.7, 143.0. HRMS (ESI, TOF) Calcd for C<sub>13</sub>H<sub>9</sub>BrClN<sub>2</sub> [M+H]<sup>+</sup>: 306.9638. Found: 306.9634. Rt: (DAICEL CHIRALCEL<sup>®</sup> OJ-H, hexane/EtOH/DEA = 90/10/0.1, 1.0 mL/min, 30 °C, 254 nm): 8.9 min (90%), 10.3 min (10%).

**(rac)-1-(2-Chlorophenyl-1-yl)-2-bromo-benzo[*d*]imidazole [(rac)-**3j**]:** Following the General Procedure II, a mixture of 2-bromo-benzimidazole (**1b**) (41 mg, 0.20 mmol), 2chlorophenyl boronic acid (**2e**) (64 mg, 0.40 mmol) and MnO<sub>2</sub> (174 mg, 2.0 mmol) in the Stock Solution (B) [2.0 mL, 0.050 mmol (Cu), 0.10 mmol (TMEDA)] was stirred for 22 h at 25 °C. The crude material was purified by column chromatography on silica gel (hexane/EtOAc = 2:1) to afford the titled compound (rac)-**3j** (48 mg, 77% isolated yield) as a pale yellow oil. <sup>1</sup>H NMR spectra was identical with chiral one shown above. Rt: (DAICEL CHIRALCEL<sup>®</sup> OJ-H, hexane/EtOH/DEA = 90/10/0.1, 1.0 mL/min, 30 °C, 254 nm): 8.7 min (50%), 10.01 min (50%).

## HPLC data of 1-(2-chlorophenyl-1-yl)-2-bromo-benzo[*d*]imidazole (3j)

### 【PDA chromatograms】

(*rac*)-3j

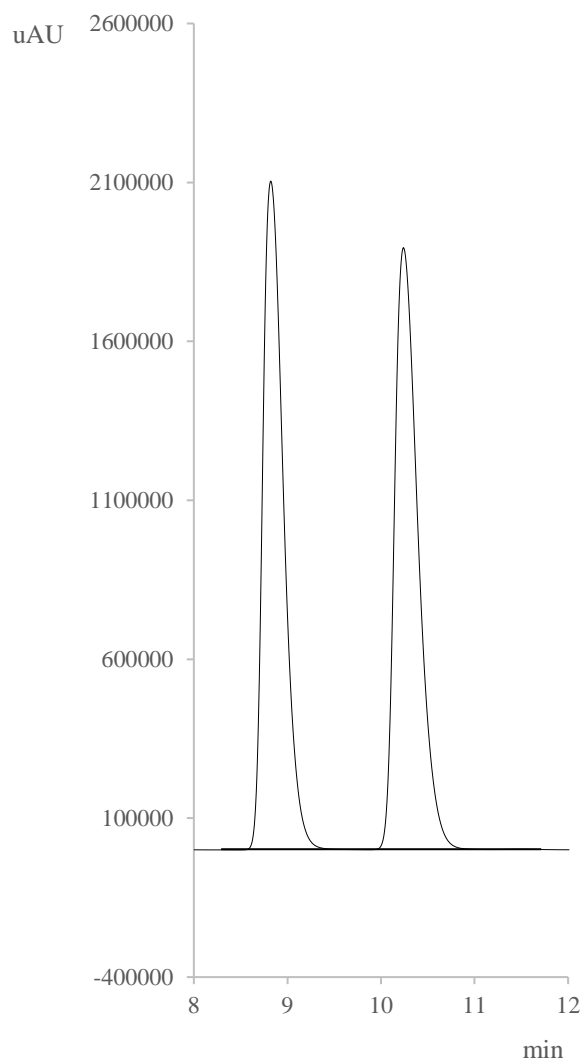

| Peak# | Ret. Time | Area     | Area% |
|-------|-----------|----------|-------|
| 1     | 8.82      | 32316644 | 49.5  |
| 2     | 10.24     | 32943357 | 50.5  |
| total |           | 65260001 | 100   |

(-)-3j

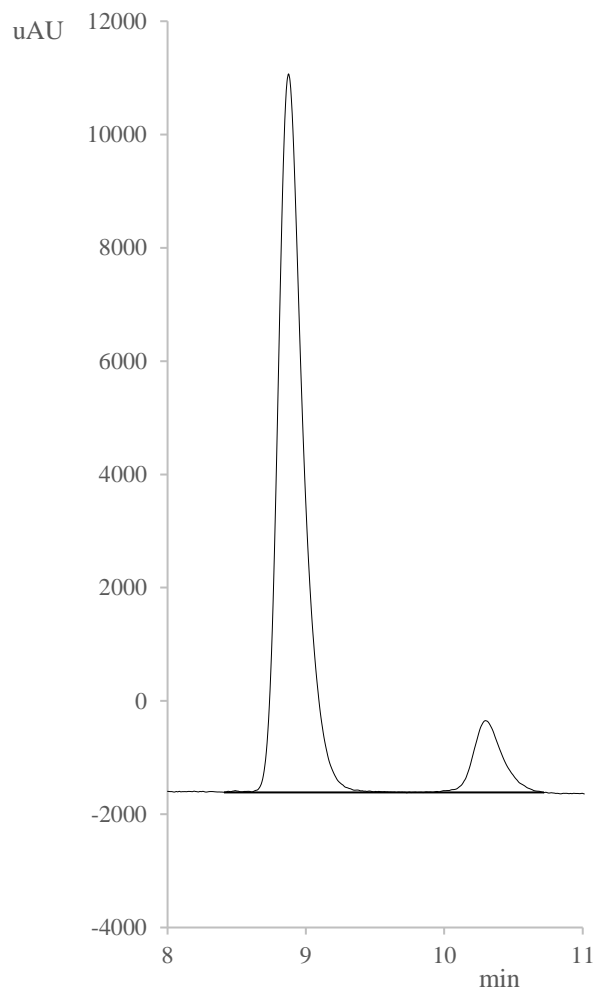

| Peak# | Ret. Time | Area    | Area% |
|-------|-----------|---------|-------|
| 1     | 8.87      | 158736  | 89.8  |
| 2     | 10.3      | 17974   | 10.2  |
| total |           | 4093379 | 100   |

### 1-(2-Bromophenyl-1-yl)-2-bromo-benzo[*d*]imidazole (**3k**) (Table 3)

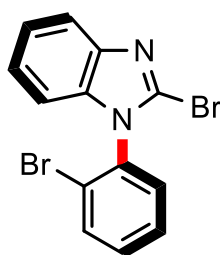

**3k**

**(-)-1-(2-Bromophenyl-1-yl)-2-bromo-benzo[*d*]imidazole [(-)-**3k**]:** Following the General Procedure I, a mixture of 2-bromo-benzimidazole (**1b**) (41 mg, 0.20 mmol), 2-bromophenyl boronic acid (**2f**) (80 mg, 0.40 mmol) and MnO<sub>2</sub> (174 mg, 2.0 mmol) in the Stock Solution (A) [2.0 mL, 0.050 mmol (Cu), 0.10 mmol (**4j**)] was stirred for 22 h at 25 °C. The crude material was purified by column chromatography on silica gel (hexane/EtOAc = 2:1) to afford the titled compound (-)-**3k** (70 mg, quant, 80% ee) as a pale yellow oil.  $[\alpha]_D^{20} = -12.5$  (c 0.94, MeOH). IR: 3057 cm<sup>-1</sup>. <sup>1</sup>H NMR (400 MHz, CDCl<sub>3</sub>)  $\delta$ : 6.97 (1 H, d, *J* = 8.0 Hz), 7.25 (1 H, dd, *J* = 7.5, 7.5 Hz), 7.31 (1 H, dd, *J* = 8.5, 8.5 Hz), 7.43 (1 H, d, *J* = 8.0 Hz), 7.48 (1 H, dd, *J* = 7.5, 7.5 Hz), 7.55 (1 H, dd, *J* = 8.0, 8.0 Hz), 7.79 (1 H, d, *J* = 8.0 Hz), 7.83 (1 H, d, *J* = 8.0 Hz). <sup>13</sup>C NMR (100 MHz, CDCl<sub>3</sub>)  $\delta$ : 110.2, 119.4, 123.1, 123.5, 123.8, 128.9, 129.8, 130.6, 131.6, 134.0, 134.6, 136.7, 143.0. HRMS (ESI, TOF) Calcd for C<sub>13</sub>H<sub>9</sub>Br<sub>2</sub>N<sub>2</sub> [M+H]<sup>+</sup>: 350.9132. Found: 350.9127. Rt: (DAICEL CHIRALCEL<sup>®</sup> OJ-H, hexane/*i*-PrOH = 95/5, 1.0 mL/min, 30 °C, 254 nm): 19.67 min (10%), 20.87 min (90%).

**(rac)-1-(2-Bromophenyl-1-yl)-2-bromo-benzo[*d*]imidazole [(rac)-**3k**]:** Following the General Procedure II, a mixture of 2-bromo-benzimidazole (**1b**) (41 mg, 0.20 mmol), 2-chlorophenyl boronic acid (**2f**) (80 mg, 0.40 mmol) and MnO<sub>2</sub> (174 mg, 2.0 mmol) in the Stock Solution (B) [2.0 mL, 0.050 mmol (Cu), 0.10 mmol (TMEDA)] was stirred for 22 h at 25 °C. The crude material was purified by column chromatography on silica gel (hexane/EtOAc = 2:1) to afford the titled compound (rac)-**3k** (70 mg, quant) as a pale yellow oil. <sup>1</sup>H NMR spectra was identical with chiral one shown above. Rt: (DAICEL CHIRALCEL<sup>®</sup> OJ-H, hexane/*i*-PrOH = 95/5, 1.0 mL/min, 30 °C, 254 nm): 21.56 min (50%), 23.24 min (50%).

# HPLC data of 1-(2-bromophenyl-1-yl)-2-bromo-benzo[d]imidazole (3k)

## 【PDA chromatograms】

(rac)-3k

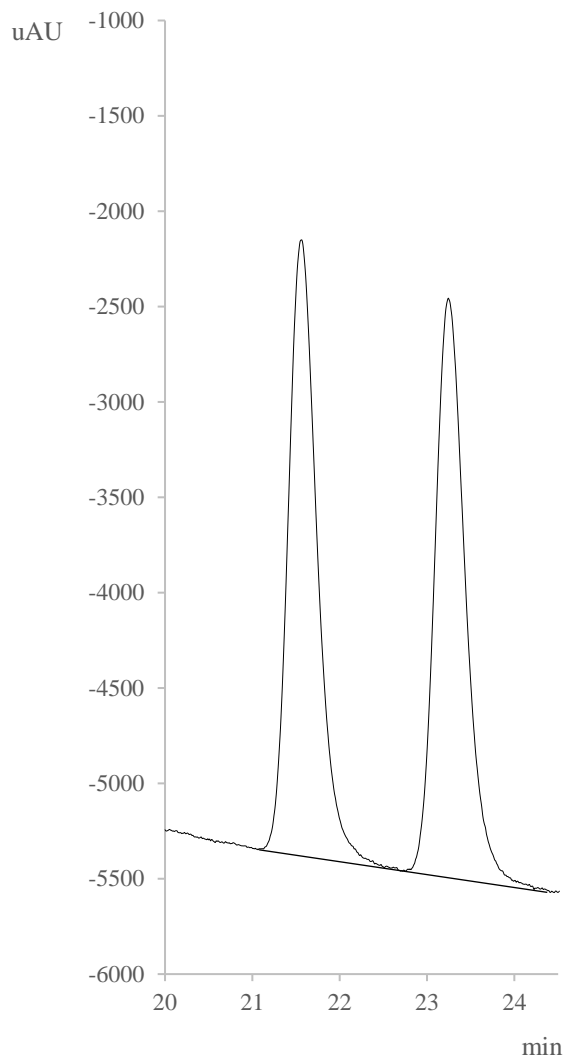

| Peak# | Ret. Time | Area   | Area% |
|-------|-----------|--------|-------|
| 1     | 21.56     | 72682  | 50.2  |
| 2     | 23.24     | 71852  | 49.8  |
| total |           | 144534 | 100   |

(-)-3k

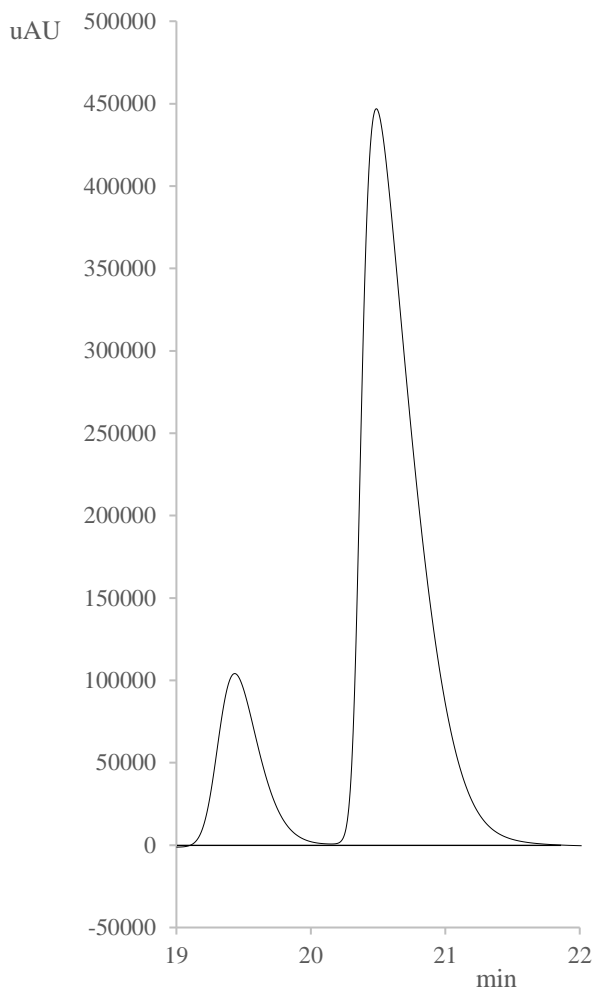

| Peak# | Ret. Time | Area    | Area% |
|-------|-----------|---------|-------|
| 1     | 19.67     | 664139  | 9.6   |
| 2     | 20.87     | 6325033 | 90.4  |
| total |           | 6989172 | 100   |



### 1-(2-Iodophenyl-1-yl)-2-bromo-benzo[*d*]imidazole (**3l**) (Table 3)

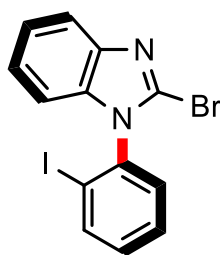

**3l**

**(-)-1-(2-Iodophenyl-1-yl)-2-bromo-benzo[*d*]imidazole [(-)-**3l**]:** Following the General Procedure I, a mixture of 2-bromo-benzimidazole (**1b**) (41 mg, 0.20 mmol), 2-iodophenyl boronic acid (**2g**) (101 mg, 0.40 mmol) and MnO<sub>2</sub> (174 mg, 2.0 mmol) in the Stock Solution (A) [2.0 mL, 0.050 mmol (Cu), 0.10 mmol (**4j**)] was stirred for 22 h at 25 °C. The crude material was purified by column chromatography on silica gel (hexane/EtOAc = 2:1) to afford the titled compound (-)-**3l** (80 mg, quant, 80% ee) as a pale yellow oil.  $[\alpha]_D^{20} = -19.8$  (c 1.1, MeOH). IR: 3055 cm<sup>-1</sup>. <sup>1</sup>H NMR (400 MHz, CDCl<sub>3</sub>)  $\delta$ : 6.94 (1 H, d, *J* = 8.0 Hz), 7.24 (1 H, dd, *J* = 8.0, 8.0 Hz), 7.28–7.32 (2 H, m), 7.38 (1 H, d, *J* = 8.0 Hz), 7.57 (1 H, dd, *J* = 7.5, 7.5 Hz), 7.79 (1 H, d, *J* = 8.0 Hz), 8.05 (1 H, d, *J* = 8.0 Hz). <sup>13</sup>C NMR (100 MHz, CDCl<sub>3</sub>)  $\delta$ : 98.8, 110.3, 119.4, 123.1, 123.8, 129.5, 129.7, 129.9, 131.5, 136.4, 138.1, 140.3, 142.9. HRMS (ESI, TOF) Calcd for C<sub>13</sub>H<sub>9</sub>BrIN<sub>2</sub> [M+H]<sup>+</sup>: 398.8994. Found: 398.8987. Rt: (DAICEL CHIRALCEL<sup>®</sup> OJ-H, hexane/EtOH/DEA = 90/10/0.5, 1.0 mL/min, 30 °C, 254 nm): 10.17 min (90%), 13.45 min (10%).

**(rac)-1-(2-Iodophenyl-1-yl)-2-bromo-benzo[*d*]imidazole [(rac)-**3l**]:** Following the General Procedure II, a mixture of 2-bromo-benzimidazole (**1b**) (41 mg, 0.20 mmol), 2-iodophenyl boronic acid (**2e**) (101 mg, 0.40 mmol) and MnO<sub>2</sub> (174 mg, 2.0 mmol) in the Stock Solution (B) [2.0 mL, 0.050 mmol (Cu), 0.10 mmol (TMEDA)] was stirred for 22 h at 25 °C. The crude material was purified by column chromatography on silica gel (hexane/EtOAc = 2:1) to afford the titled compound (rac)-**3l** (80 mg, quant) as a pale yellow oil. <sup>1</sup>H NMR spectra was identical with chiral one shown above. Rt: (DAICEL CHIRALCEL<sup>®</sup> OJ-H, hexane/EtOH/DEA = 90/10/0.5, 1.0 mL/min, 30 °C, 254 nm): 10.04 min (51%), 12.68 min (49%).

# HPLC data of 1-(2-iodophenyl-1-yl)-2-bromo-benzo[d]imidazole (31)

## 【PDA chromatograms】

(rac)-31

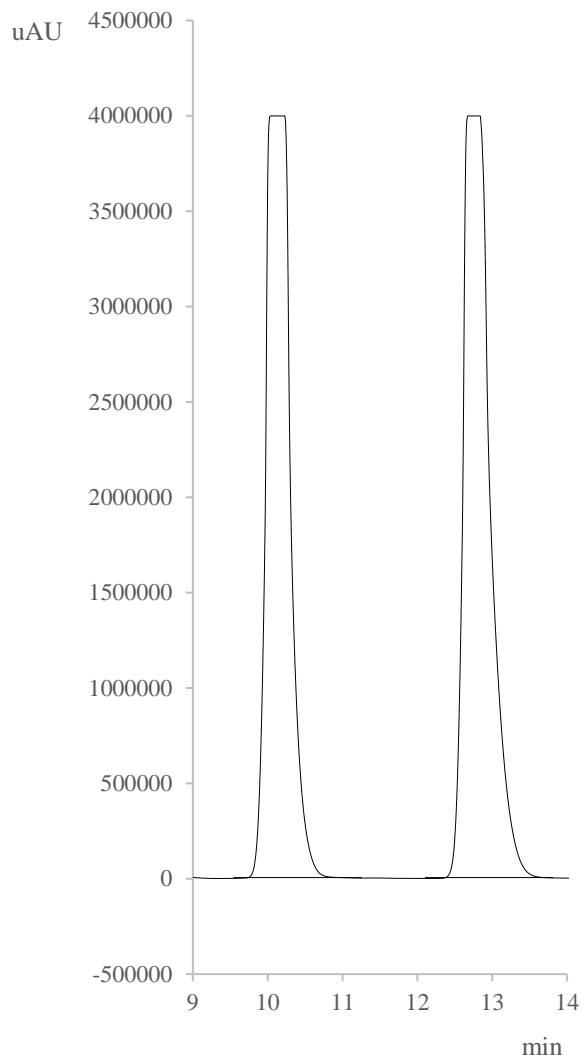

| Peak# | Ret. Time | Area     | Area% |
|-------|-----------|----------|-------|
| 1     | 10.04     | 92422636 | 50.7  |
| 2     | 12.68     | 92426787 | 49.3  |
| total |           | 1.85E+08 | 100   |

(-)-31

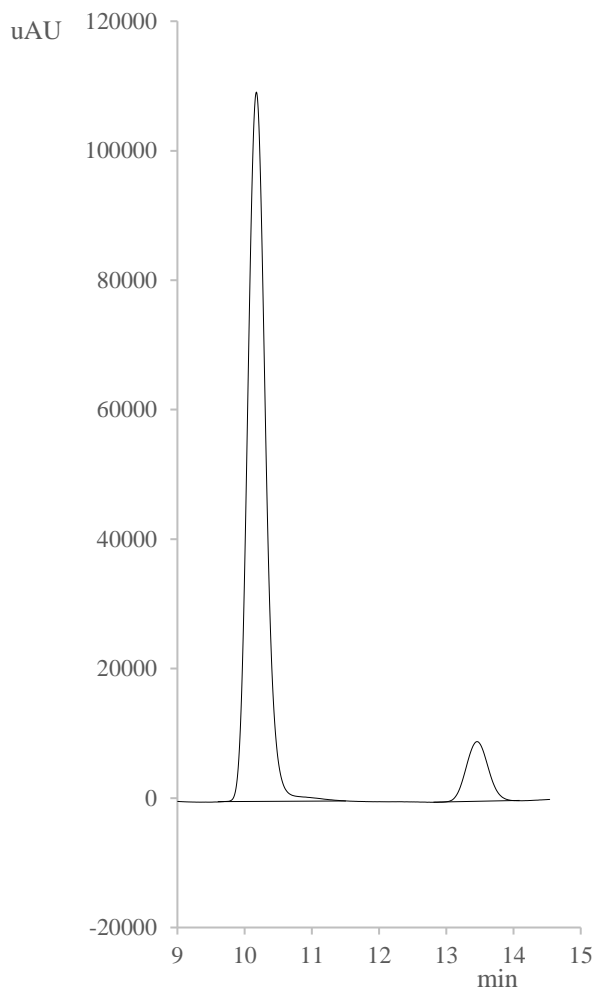

| Peak# | Ret. Time | Area    | Area% |
|-------|-----------|---------|-------|
| 1     | 10.17     | 2023352 | 90.4  |
| 2     | 13.45     | 213448  | 9.6   |
| total |           | 2236800 | 100   |

**1-(2-Trifluorophenyl-1-yl)-2-bromo-benzo[*d*]imidazole (3m) (Table 3)**

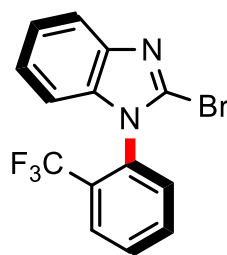

**3m**

**(-)-1-(2-Trifluorophenyl-1-yl)-2-bromo-benzo[*d*]imidazole [(-)-3m]:** Following the General Procedure I, a mixture of 2-bromo-benzimidazole (**1b**) (41 mg, 0.20 mmol), 2-trifluorophenyl boronic acid (**2h**) (78 mg, 0.40 mmol) and MnO<sub>2</sub> (174 mg, 2.0 mmol) in the Stock Solution (A) [2.0 mL, 0.050 mmol (Cu), 0.10 mmol (**4j**)] was stirred for 22 h at 25 °C. The crude material was purified by column chromatography on silica gel (hexane/EtOAc = 2:1) to afford the titled compound (-)-**3m** (16 mg, 23% isolated yield, 86% ee) as a pale yellow oil.  $[\alpha]_D^{20} = -2.8$  (c 0.79, MeOH). IR: 3058 cm<sup>-1</sup>. <sup>1</sup>H NMR (400 MHz, CDCl<sub>3</sub>)  $\delta$ : 6.85 (1 H, d,  $J = 8.0$  Hz), 7.14–7.25 (2 H, m), 7.31 (1 H, d,  $J = 7.5$  Hz), 7.67–7.75 (3 H, m), 7.87 (1 H, d,  $J = 7.5$  Hz). <sup>13</sup>C NMR (100 MHz, CDCl<sub>3</sub>)  $\delta$ : 110.4, 119.3, 122.5 (q,  $J = 273.5$  Hz), 123.1, 123.8, 127.8 (q,  $J = 5.0$  Hz), 129.5 (q,  $J = 31.5$  Hz), 130.5, 130.7, 131.7, 133.2, 133.5, 138.2, 142.9. <sup>19</sup>F NMR (471 MHz, CDCl<sub>3</sub>)  $\delta$ : -60.7. HRMS (ESI, TOF) Calcd for C<sub>14</sub>H<sub>9</sub>BrF<sub>3</sub>N<sub>2</sub> [M+H]<sup>+</sup>: 340.9901. Found: 340.9892. Rt: (DAICEL CHIRALPAK<sup>®</sup> AD-H, hexane/EtOH/DEA = 90/10/0.1, 1.0 mL/min, 30 °C, 254 nm): 7.6 min (7%), 8.99 min (93%).

**(rac)-1-(2-Trifluorophenyl-1-yl)-2-bromo-benzo[*d*]imidazole [(rac)-3m]:** Following the General Procedure II, a mixture of 2-bromo-benzimidazole (**1b**) (41 mg, 0.20 mmol), 2-trifluorophenyl boronic acid (**2h**) (78 mg, 0.40 mmol) and MnO<sub>2</sub> (174 mg, 2.0 mmol) in the Stock Solution (B) [2.0 mL, 0.050 mmol (Cu), 0.10 mmol (TMEDA)] was stirred for 22 h at 25 °C. The crude material was purified by column chromatography on silica gel (hexane/EtOAc = 2:1) to afford the titled compound (rac)-**3m** (65 mg, 93% isolated yield) as a pale yellow oil. <sup>1</sup>H NMR spectra was identical with chiral one shown above. Rt: (DAICEL CHIRALPAK<sup>®</sup> AD-H, hexane/EtOH/DEA = 90/10/0.1, 1.0 mL/min, 30 °C, 254 nm): 7.56 min (51%), 9.08 min (49%).

**HPLC data of 1-(2-trifluorophenyl-1-yl)-2-bromo-benzo[d]imidazole (3m)**

**【PDA chromatograms】**

*(rac)*-3m

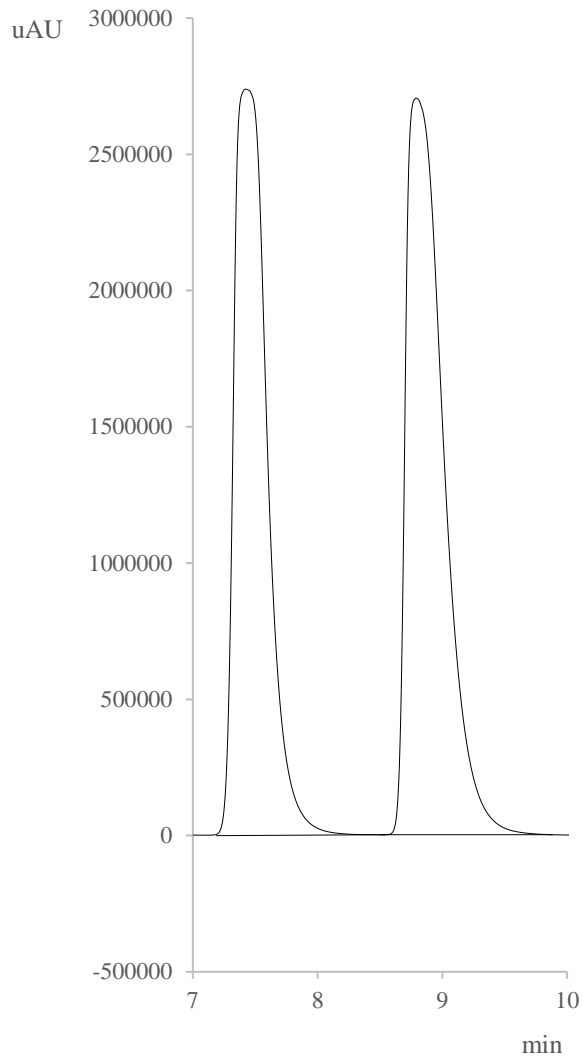

| Peak# | Ret. Time | Area     | Area% |
|-------|-----------|----------|-------|
| 1     | 7.59      | 20137695 | 50.56 |
| 2     | 9.08      | 19688170 | 49.44 |
| total |           | 39825865 | 100   |

*(-)*-3m

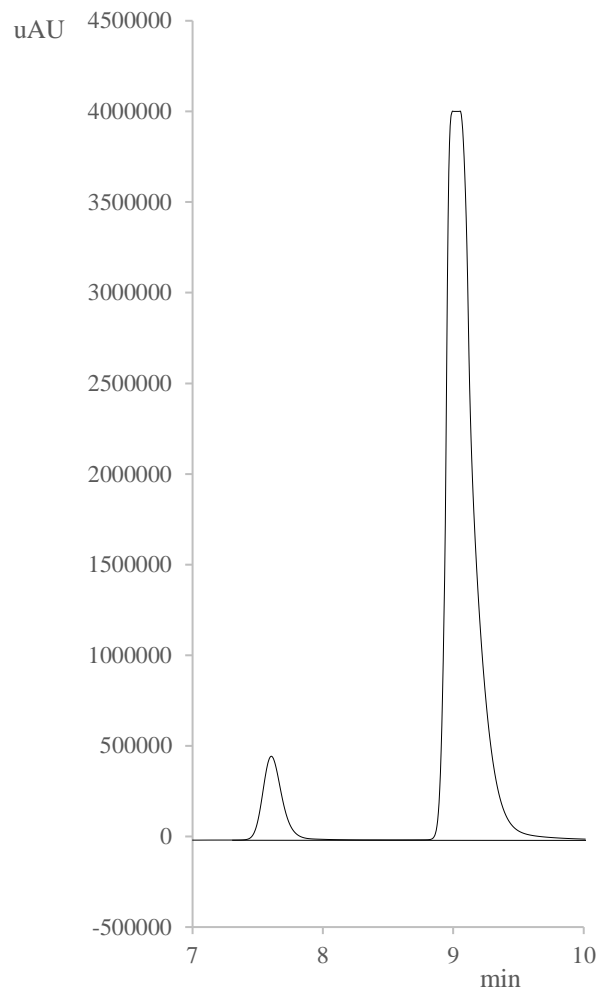

| Peak# | Ret. Time | Area     | Area% |
|-------|-----------|----------|-------|
| 1     | 7.6       | 4687785  | 7.4   |
| 2     | 8.99      | 58073739 | 92.53 |
| total |           | 62761524 | 100   |

### 1-(2-Isopropylphenyl-1-yl)-2-bromo-benzo[*d*]imidazole (**3n**) (Table 3)

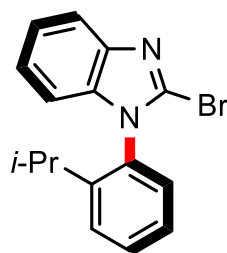

**3n**

**(-)-1-(2-Isopropylphenyl-1-yl)-2-bromo-benzo[*d*]imidazole [(-)-**3n**]:** Following the General Procedure I, a mixture of 2-bromo-benzimidazole (**1b**) (41 mg, 0.20 mmol), 2-isopropylphenyl boronic acid (**2i**) (67 mg, 0.40 mmol) and MnO<sub>2</sub> (174 mg, 2.0 mmol) in the Stock Solution (A) [2.0 mL, 0.050 mmol (Cu), 0.10 mmol (**4j**)] was stirred for 22 h at 25 °C. The crude material was purified by column chromatography on silica gel (hexane/EtOAc = 2:1) to afford the titled compound (-)-**3n** (28 mg, 44% isolated yield, 80% ee) as a colorless solid. [ $\alpha$ ]<sub>D</sub><sup>20</sup> = -30.7 (c 1.0, MeOH). Mp: 87–88 °C. IR: 2960 cm<sup>-1</sup>. <sup>1</sup>H NMR (400 MHz, CDCl<sub>3</sub>)  $\delta$ : 0.98 (3 H, d, *J* = 7.0 Hz), 1.11 (3 H, d, *J* = 7.0 Hz), 2.36–2.43 (1 H, m), 6.87 (1 H, d, *J* = 8.0 Hz), 7.11–7.24 (3 H, m), 7.30 (1 H, dd, *J* = 7.5, 7.5 Hz), 7.47–7.53 (2 H, m), 7.71 (1 H, d, *J* = 8.0 Hz). <sup>13</sup>C NMR (100 MHz, CDCl<sub>3</sub>)  $\delta$ : 23.4, 24.0, 28.1, 110.3, 119.3, 122.9, 123.6, 127.1, 127.2, 129.0, 130.7, 130.8, 132.7, 137.7, 143.0, 147.5. HRMS (ESI, TOF) Calcd for C<sub>13</sub>H<sub>16</sub>BrN<sub>2</sub> [M+H]<sup>+</sup>: 315.0497. Found: 315.0485. Rt: (DAICEL CHIRALPAK<sup>®</sup> ID-3, hexane/EtOH/DEA = 90/10/0.1, 1.0 mL/min, 30 °C, 254 nm): 6.92 min (90%), 7.3 min (10%).

**(rac)-1-(2-Isopropylphenyl-1-yl)-2-bromo-benzo[*d*]imidazole [(rac)-**3n**]:** Following the General Procedure II, a mixture of 2-bromo-benzimidazole (**1b**) (21 mg, 0.10 mmol), 2-isopropylphenyl boronic acid (**2i**) (34 mg, 0.20 mmol) and MnO<sub>2</sub> (87 mg, 1.0 mmol) in the Stock Solution (B) [1.0 mL, 0.025 mmol (Cu), 0.05 mmol (TMEDA)] was stirred for 22 h at 25 °C. The crude material was purified by column chromatography on silica gel (hexane/EtOAc = 2:1) to afford the titled compound (rac)-**3n** (27 mg, 88% isolated yield) as a colorless solid. <sup>1</sup>H NMR spectra was identical with chiral one shown above. Rt: (DAICEL CHIRALPAK<sup>®</sup> ID-3, hexane/EtOH/DEA = 90/10/0.1, 1.0 mL/min, 30 °C, 254 nm): 7.28 min (50%), 7.85 min 50%).

# HPLC data of 1-(2-isopropylphenyl-1-yl)-2-bromo-benzo[d]imidazole (3n)

## 【PDA chromatograms】

(rac)-3n

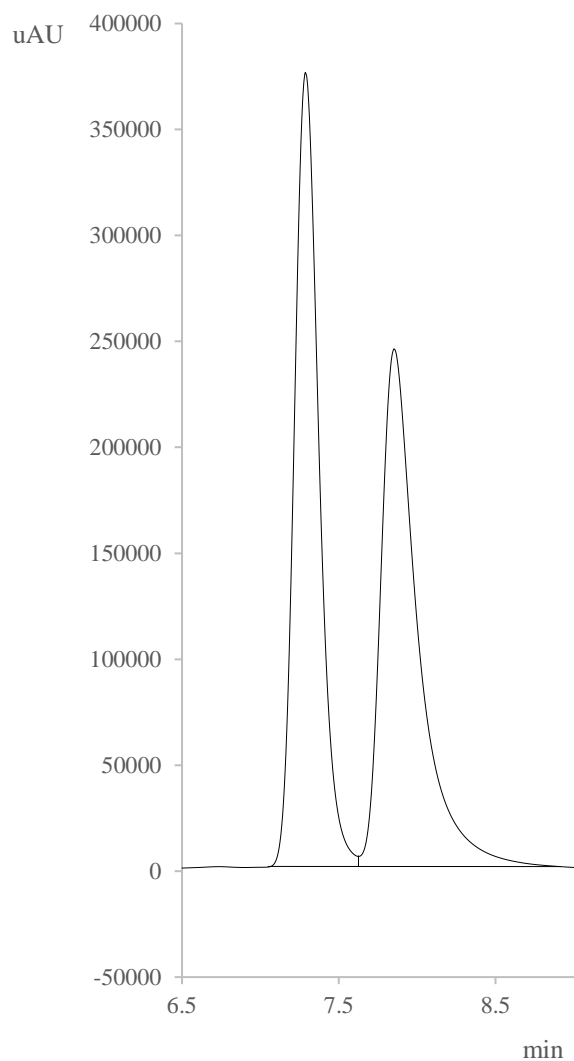

| Peak# | Ret. Time | Area    | Area% |
|-------|-----------|---------|-------|
| 1     | 7.28      | 4135203 | 50.05 |
| 2     | 7.85      | 4124595 | 49.95 |
| total |           | 8259798 | 100   |

(-)-3n

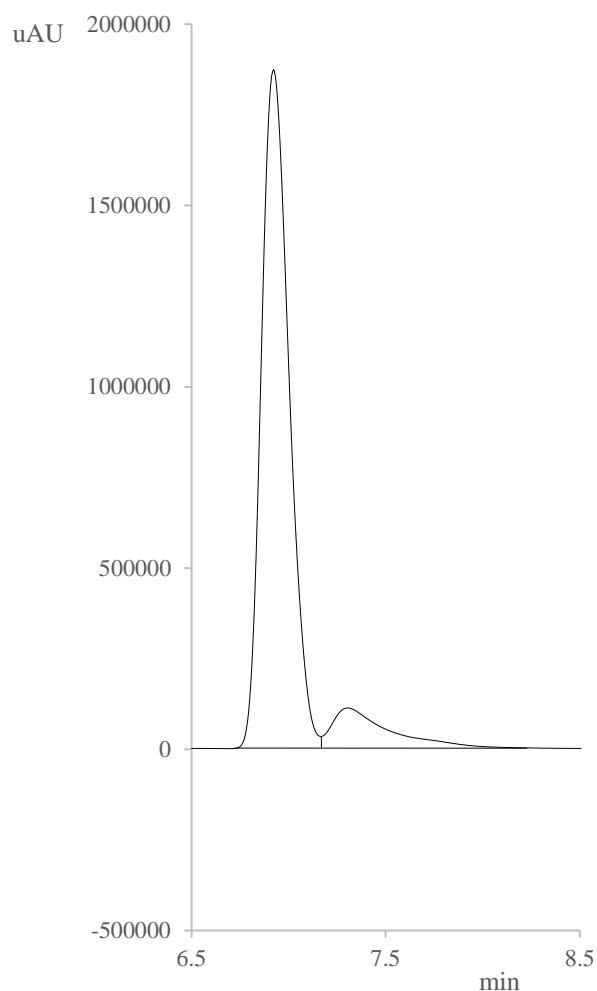

| Peak# | Ret. Time | Area     | Area% |
|-------|-----------|----------|-------|
| 1     | 6.92      | 18687355 | 90    |
| 2     | 7.3       | 2086572  | 10    |
| total |           | 20773927 | 100   |

**1-(2-Benzyloxyphenyl-1-yl)-2-bromo-benzo[*d*]imidazole (3o) (Table 3)**

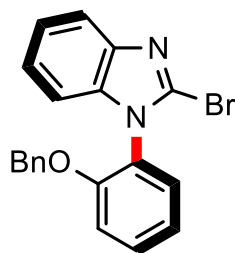

**3o**

**(-)-1-(2-Benzyloxyphenyl-1-yl)-2-bromo-benzo[*d*]imidazole [(-)-3o]:** Following the General Procedure I, a mixture of 2-bromo-benzimidazole (**1b**) (41 mg, 0.20 mmol), 2-benzyloxyphenyl boronic acid (**2j**) (91 mg, 0.40 mmol) and MnO<sub>2</sub> (174 mg, 2.0 mmol) in the Stock Solution (A) [2.0 mL, 0.050 mmol (Cu), 0.10 mmol (**4j**)] was stirred for 22 h at 25 °C. The crude material was purified by column chromatography on silica gel (hexane/EtOAc = 2:1) to afford the titled compound (-)-**3o** (76 mg, quant, 60% ee) as a pale yellow oil. [α]<sub>D</sub><sup>20</sup> = -4.91 (c 0.94, MeOH). IR: 3062 cm<sup>-1</sup>. <sup>1</sup>H NMR (400 MHz, CDCl<sub>3</sub>) δ: 4.96 (1 H, d, *J* = 12.5 Hz), 5.00 (1 H, d, *J* = 12.5 Hz), 6.95 (1 H, d, *J* = 8.0 Hz), 7.02–7.05 (2 H, m), 7.07–7.09 (2 H, m), 7.12–7.22 (5 H, m), 7.28 (1 H, dd, *J* = 8.0, 8.0 Hz), 7.42 (1 H, dd, *J* = 8.0, 8.0 Hz), 7.70 (1 H, d, *J* = 8.0 Hz). <sup>13</sup>C NMR (100 MHz, CDCl<sub>3</sub>) δ: 70.3, 110.4, 114.1, 119.1, 121.3, 122.7, 123.4, 124.2, 126.7, 127.9, 128.5, 129.8, 130.9, 131.2, 135.9, 137.3, 143.0, 154.5. HRMS (ESI, TOF) Calcd for C<sub>20</sub>H<sub>16</sub>BrN<sub>2</sub> [M+H]<sup>+</sup>: 379.0446. Found: 379.0448. Rt: (DAICEL CHIRALPAK<sup>®</sup> IB-N, hexane/EtOH/DEA = 90/10/0.5, 1.0 mL/min, 30 °C, 254 nm): 10.15 min (80%), 11.87 min (20%).

**(rac)-1-(2-Benzyloxyphenyl-1-yl)-2-bromo-benzo[*d*]imidazole [(rac)-3o]:** Following the General Procedure II, a mixture of 2-bromo-benzimidazole (**1b**) (0.41 g, 2.0 mmol), 2-benzyloxyphenyl boronic acid (**2j**) (0.91 g, 4.0 mmol) and MnO<sub>2</sub> (1.7 g, 20 mmol) in the Stock Solution (B) [20 mL, 0.50 mmol (Cu), 1.0 mmol (TMEDA)] was stirred for 22 h at 25 °C. The crude material was purified by column chromatography on silica gel (hexane/EtOAc = 2:1) to afford the titled compound (rac)-**3o** (0.28 g, 37% isolated yield) as a pale yellow oil. <sup>1</sup>H NMR spectra was identical with chiral one shown above. Rt: (DAICEL CHIRALPAK<sup>®</sup> IB-N, hexane/EtOH/DEA = 90/10/0.5, 1.0 mL/min, 30 °C, 254 nm): 10.59 min (50%), 12.27 min (50%).

## HPLC data of 1-(2-benzyloxyphenyl-1-yl)-2-bromo-benzo[*d*]imidazole (3o)

### 【PDA chromatograms】

(*rac*)-3o

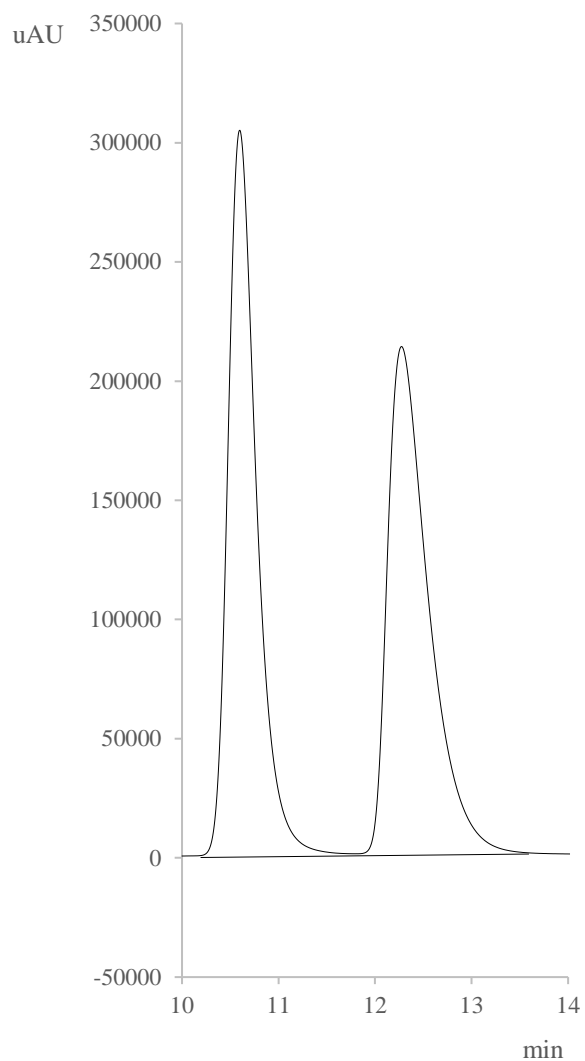

| Peak# | Ret. Time | Area     | Area% |
|-------|-----------|----------|-------|
| 1     | 10.59     | 6285679  | 49.9  |
| 2     | 12.27     | 6299147  | 50.05 |
| total |           | 12584826 | 100   |

(-)-3o

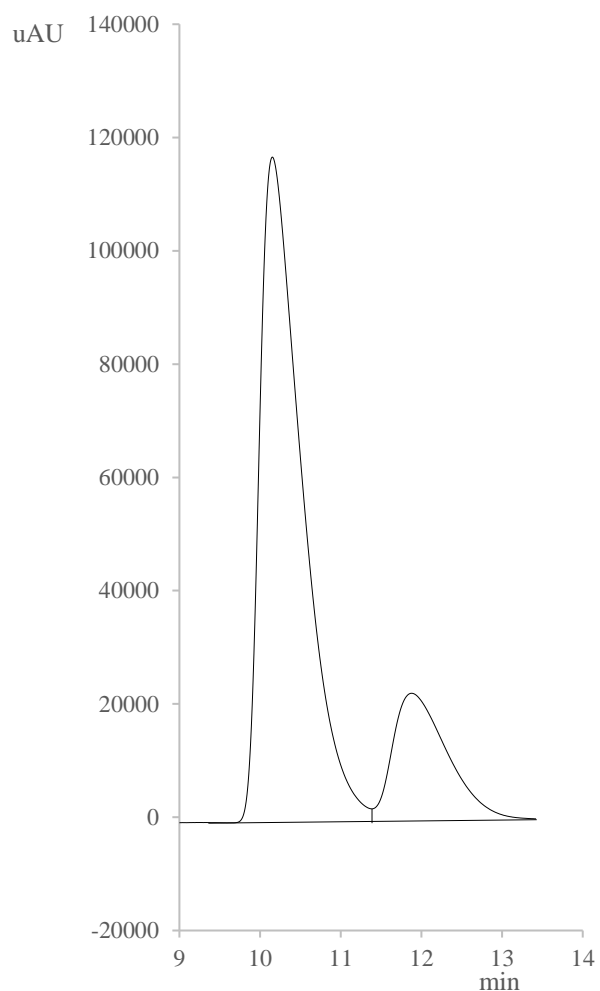

| Peak# | Ret. Time | Area    | Area% |
|-------|-----------|---------|-------|
| 1     | 10.15     | 4283044 | 80.3  |
| 2     | 11.87     | 1051240 | 19.7  |
| total |           | 5334284 | 100   |



### 1-(2-Methylphenyl-1-yl)-2-bromo-benzo[*d*]imidazole (**3p**) (Table 3)

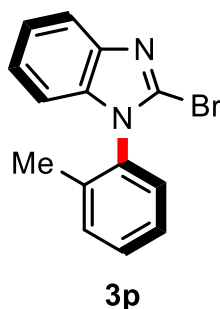

**(-)-1-(2-Methylphenyl-1-yl)-2-bromo-benzo[*d*]imidazole [(-)-**3p**]:** Following the General Procedure I, a mixture of 2-bromo-benzimidazole (**1b**) (41 mg, 0.20 mmol), 2-methylphenyl boronic acid (**2k**) (91 mg, 0.40 mmol) and MnO<sub>2</sub> (174 mg, 2.0 mmol) in the Stock Solution (A) [2.0 mL, 0.050 mmol (Cu), 0.10 mmol (**4j**)] was stirred for 22 h at 25 °C. The crude material was purified by column chromatography on silica gel (hexane/EtOAc = 2:1) to afford the titled compound (-)-**3p** (76 mg, quant, 56% ee) as a pale yellow oil.  $[\alpha]_{\text{D}}^{20} = -4.91$  (c 0.94, MeOH). IR: 3054 cm<sup>-1</sup>. <sup>1</sup>H NMR (400 MHz, CDCl<sub>3</sub>)  $\delta$ : 2.01 (3 H, s), 6.95 (1 H, d,  $J = 8.0$  Hz), 7.21–7.31 (3 H, m), 7.38–7.51 (3 H, m), 7.79 (1 H, d,  $J = 8.0$  Hz). <sup>13</sup>C NMR (100 MHz, CDCl<sub>3</sub>)  $\delta$ : 17.4, 110.2, 119.3, 122.9, 123.6, 127.3, 128.8, 130.1, 131.4, 134.1, 136.8, 136.9, 143.1. HRMS (ESI, TOF) Calcd for C<sub>14</sub>H<sub>12</sub>BrN<sub>2</sub> [M+H]<sup>+</sup>: 287.0184. Found: 287.0174. Rt: (DAICEL CHIRALCEL<sup>®</sup> OJ-H, hexane/EtOH/DEA = 90/10/0.1, 1.0 mL/min, 30 °C, 254 nm): 6.96 min (78%), 7.56 min (22%).

**(rac)-1-(2-Methylphenyl-1-yl)-2-bromo-benzo[*d*]imidazole [(rac)-**3p**]:** Following the General Procedure II, a mixture of 2-bromo-benzimidazole (**1b**) (41 mg, 0.20 mmol), 2-methylphenyl boronic acid (**2k**) (91 mg, 0.40 mmol) and MnO<sub>2</sub> (174 mg, 2.0 mmol) in the Stock Solution (B) [2.0 mL, 0.05 mmol (Cu), 0.1 mmol (TMEDA)] was stirred for 22 h at 25 °C. The crude material was purified by column chromatography on silica gel (hexane/EtOAc = 2:1) to afford the titled compound (rac)-**3p** (36 mg, 63% isolated yield) as a pale yellow oil. <sup>1</sup>H NMR spectra was identical with chiral one shown above. Rt: (DAICEL CHIRALCEL<sup>®</sup> OJ-H, hexane/EtOH/DEA = 90/10/0.1, 1.0 mL/min, 30 °C, 254 nm): 6.72 min (50%), 7.26 min (50%).

## HPLC data of 1-(2-methylphenyl-1-yl)-2-bromo-benzo[*d*]imidazole (3p)

### 【PDA chromatograms】

(*rac*)-3p

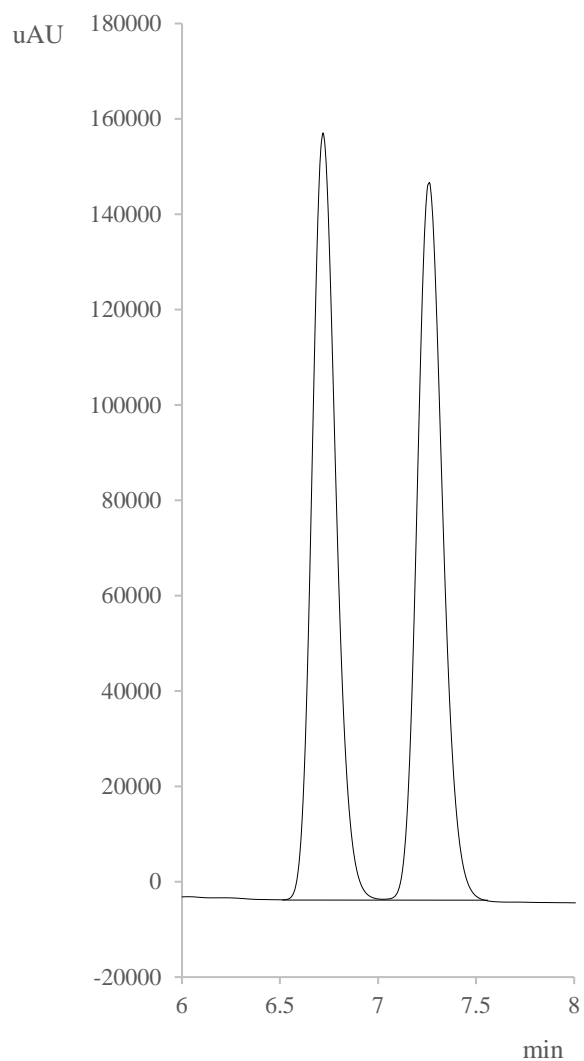

| Peak# | Ret. Time | Area    | Area% |
|-------|-----------|---------|-------|
| 1     | 6.72      | 1374282 | 49.9  |
| 2     | 7.26      | 1381787 | 50.14 |
| total |           | 2756069 | 100   |

(-)-3p

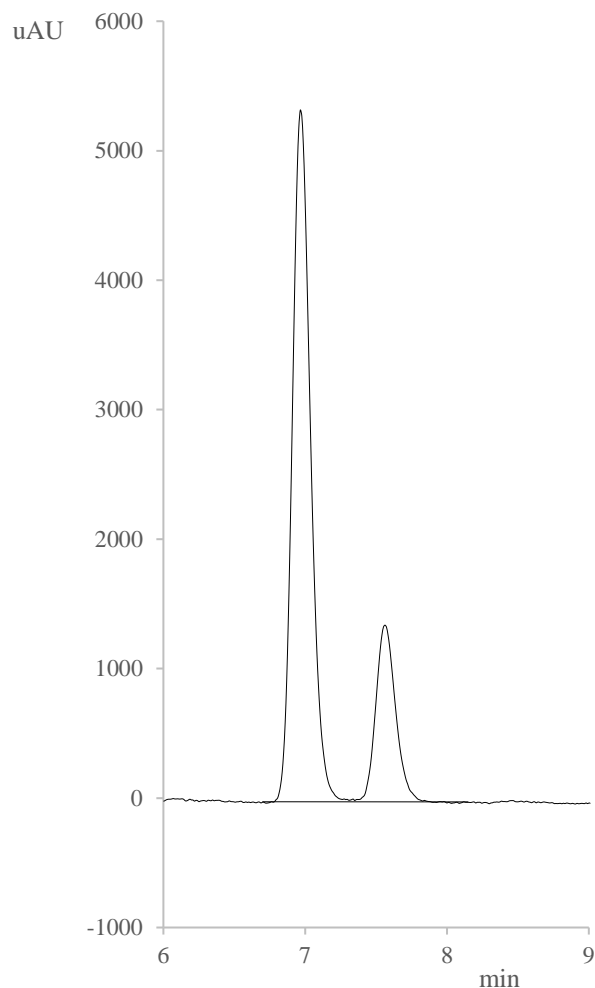

| Peak# | Ret. Time | Area  | Area% |
|-------|-----------|-------|-------|
| 1     | 6.96      | 47915 | 78.3  |
| 2     | 7.56      | 13283 | 21.7  |
| total |           | 61198 | 100   |

### 1-(2-Methoxy-2-methyl-phenyl-1-yl)-2-bromo-benzo[*d*]imidazole (**3q**) (Table 3)

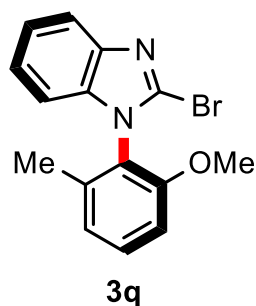

**(+)-1-(2-Methoxy-2-methyl-phenyl-1-yl)-2-bromo-benzo[*d*]imidazole [(+)-**3q**]:** Following the General Procedure I, a mixture of 2-bromo-benzimidazole (**1b**) (41 mg, 0.20 mmol), 2-methoxy-2-methyl-phenyl boronic acid (**2l**) (66 mg, 0.40 mmol) and MnO<sub>2</sub> (0.17 g, 20 mmol) in the Stock Solution (A) [2.0 mL, 0.050 mmol (Cu), 0.10 mmol (**4j**)] was stirred for 22 h at 25 °C. The crude material was purified by column chromatography on silica gel (hexane/EtOAc = 2:1) to afford the titled compound (+)-**3q** (63 mg, quant, 70% ee) as a colorless oil.  $[\alpha]_D^{20} = +11.9$  (c 1.1, MeOH). IR: 2938 cm<sup>-1</sup>. <sup>1</sup>H NMR (400 MHz, CDCl<sub>3</sub>)  $\delta$ : 1.92 (3 H, s), 3.61 (3 H, s), 6.85 (1 H, d,  $J = 8.0$  Hz), 6.85 (1 H, d,  $J = 8.0$  Hz), 6.92 (1 H, d,  $J = 8.0$  Hz), 7.13 (1 H, dd,  $J = 7.5, 7.5$  Hz), 7.17–7.21 (2 H, m), 7.35 (1 H, dd,  $J = 8.0, 8.0$  Hz), 7.70 (1 H, d,  $J = 8.0$  Hz). <sup>13</sup>C NMR (100 MHz, CDCl<sub>3</sub>)  $\delta$ : 17.4, 55.8, 109.5, 110.0, 119.2, 122.5, 122.7, 123.4, 130.8, 131.0, 136.4, 138.5, 143.3, 156.1. HRMS ESI, TOF) Calcd for C<sub>15</sub>H<sub>14</sub>BrN<sub>2</sub>O [M+H]<sup>+</sup>: 317.0290. Found: 317.0278. Rt: (DAICEL CHIRALPAK<sup>®</sup> AD-H, hexane/*i*-PrOH/DEA = 90/10/0.1, 1.0 mL/min, 30 °C, 254 nm): 7.31 min (85%), 8.98 min (15%).

**(*rac*)-1-(2-Methoxy-2-methyl-phenyl-1-yl)-2-bromo-benzo[*d*]imidazole [(*rac*)-**3q**]:** Following the General Procedure II, a mixture of 2-bromo-benzimidazole (**1b**) (51 mg, 0.25 mmol), 2-methoxy-2-methyl-phenyl boronic acid (**2l**) (83 mg, 0.5 mmol) and MnO<sub>2</sub> (0.22 g, 25 mmol) in the Stock Solution (B) [2.5 mL, 0.063 mmol (Cu), 0.13 mmol (TMEDA)] was stirred for 22 h at 25 °C. The crude material was purified by column chromatography on silica gel (hexane/EtOAc = 2:1) to afford the titled compound (*rac*)-**3q** (67 mg, 84% isolated yield) as a colorless oil. <sup>1</sup>H NMR spectra was identical with chiral one shown above. Rt: (DAICEL CHIRALPAK<sup>®</sup> AD-H, hexane/*i*-PrOH/DEA = 90/10/0.1, 1.0 mL/min, 30 °C, 254 nm): 7.29 min (50%), 8.96 min (50%).

**HPLC data of 1-(2-methoxy-2-methyl-phenyl-1-yl)-2-bromo-benzo[*d*]imidazole (**3q**)**

## 【PDA chromatograms】

*(rac)*-3q

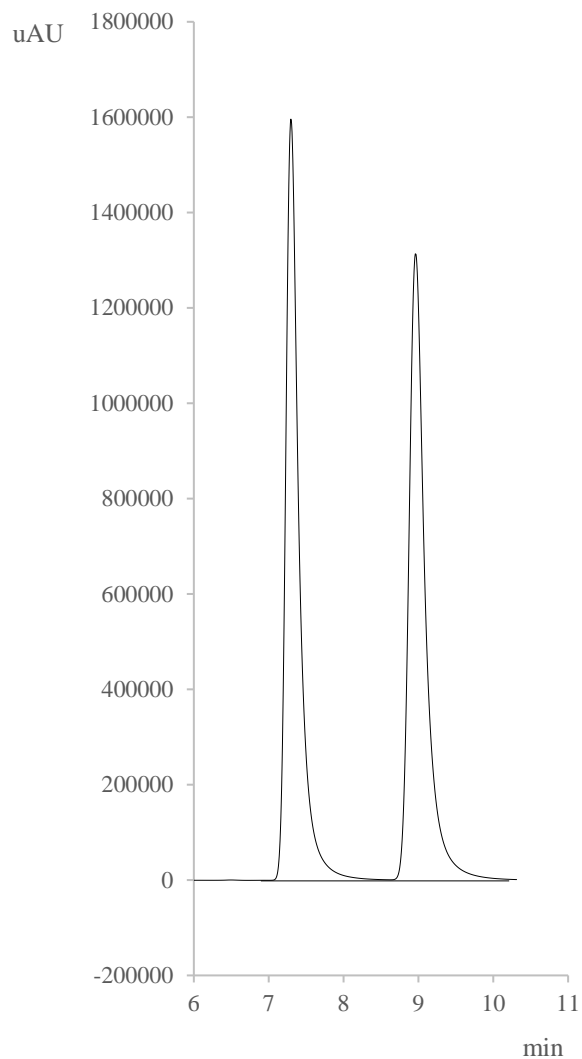

| Peak# | Ret. Time | Area     | Area% |
|-------|-----------|----------|-------|
| 1     | 7.29      | 19967645 | 50    |
| 2     | 8.96      | 19961343 | 50    |
| total |           | 39928988 | 100   |

*(+)*-3q

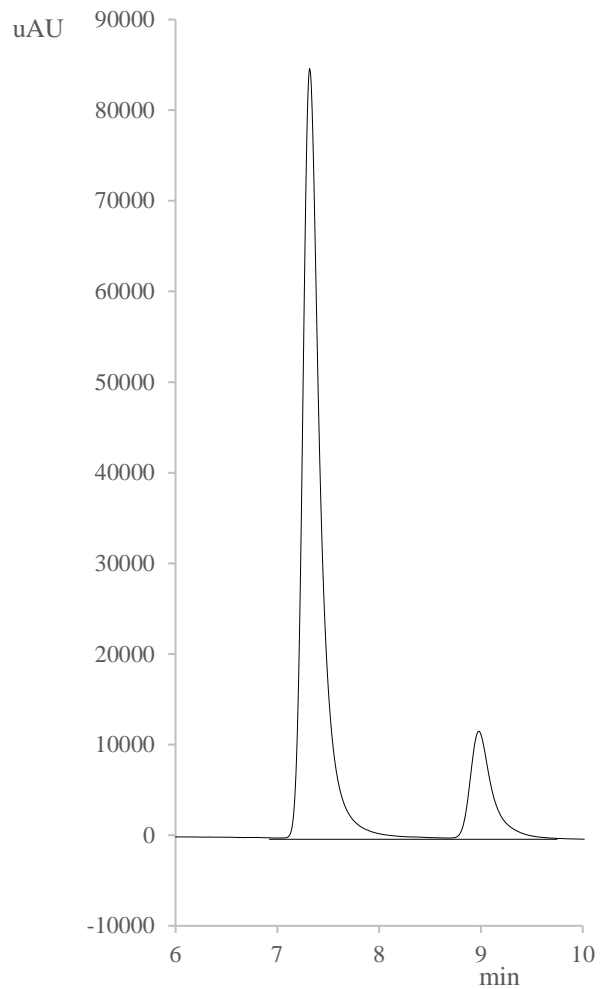

| Peak# | Ret. Time | Area    | Area% |
|-------|-----------|---------|-------|
| 1     | 7.31      | 1035292 | 85.4  |
| 2     | 8.98      | 177527  | 14.6  |
| total |           | 1212819 | 100   |

### 1-(2-Methoxynaphthalen-1-yl)-2-chloro-[*d*]imidazole (**3r**) (Table 3)

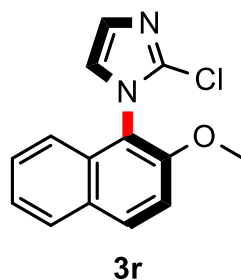

**(+)-1-(2-Methoxynaphthalen-1-yl)-2-chloro-[*d*]imidazole [(+)-**3r**]:** Following the General Procedure I, a mixture of 2-chloro-imidazole (**1f**) (21 mg, 0.20 mmol), 2-methoxynaphthalene boronic acid (**2a**) (81 mg, 0.40 mmol) and MnO<sub>2</sub> (174 mg, 2.0 mmol) in the Stock Solution (A) [2.0 mL, 0.050 mmol (Cu), 0.10 mmol (**4j**)] was stirred for 22 h at 25 °C. The crude material was purified by column chromatography on silica gel (hexane/EtOAc = 1:1) to afford the titled compound (+)-**3r** (52 mg, quant, 62% ee) as a colorless solid. [ $\alpha$ ]<sub>D</sub><sup>20</sup> = +24.2 (c 1.0, MeOH). Mp: 72–75 °C. IR: 2940 cm<sup>-1</sup>. <sup>1</sup>H NMR (400 MHz, CDCl<sub>3</sub>)  $\delta$ : 3.92 (3 H, s), 7.03 (1 H, brd, *J* = 1.0 Hz), 7.21–7.24 (2 H, m), 7.38–7.44 (2 H, m), 7.48 (1 H, dd, *J* = 7.5, 7.5 Hz), 7.87 (1 H, d, *J* = 8.0 Hz), 8.01 (1 H, d, *J* = 9.0 Hz). <sup>13</sup>C NMR (100 MHz, CDCl<sub>3</sub>)  $\delta$ : 56.3, 113.0, 117.6, 120.8, 123.3, 124.3, 127.9, 128.1, 128.4, 128.5, 131.2, 131.3, 133.8, 152.8. HRMS (ESI, TOF) Calcd for C<sub>14</sub>H<sub>12</sub>ClN<sub>2</sub>O [M+H]<sup>+</sup>: 259.0638. Found: 259.0625. Rt: (DAICEL CHIRALCEL<sup>®</sup> OJ-H, hexane/EtOH/DEA = 90/10/0.5, 1.0 mL/min, 30 °C, 254 nm): 17.59 min (81%), 20.34 min (19%).

**(rac)-1-(2-Methoxynaphthalen-1-yl)- 2-chloro-[*d*]imidazole [(rac)-**3r**]:** Following the General Procedure II, a mixture of 2-chloro-imidazole (**1f**) (0.21 g, 2.0 mmol), 2-methoxynaphthalene boronic acid (**2a**) (0.81 g, 4.0 mmol) and MnO<sub>2</sub> (1.74 g, 20 mmol) in the Stock Solution (B) [20 mL, 0.50 mmol (Cu), 1.0 mmol (TMEDA)] was stirred for 22 h at 25 °C. The crude material was purified by column chromatography on silica gel (hexane/EtOAc = 1:1) to afford the titled compound (rac)-**3r** (0.20 g, 38% isolated yield) as a colorless solid. <sup>1</sup>H NMR spectra was identical with chiral one shown above. Rt: (DAICEL CHIRALCEL<sup>®</sup> OJ-H, hexane/EtOH/DEA = 90/10/0.5, 1.0 mL/min, 30 °C, 254 nm): 16.31 min (50%), 18.22 min (50%).

# HPLC data of 1-(2-methoxynaphthalen-1-yl)-2-chloro-[d]imidazole (3r)

## 【PDA chromatograms】

(rac)-3r

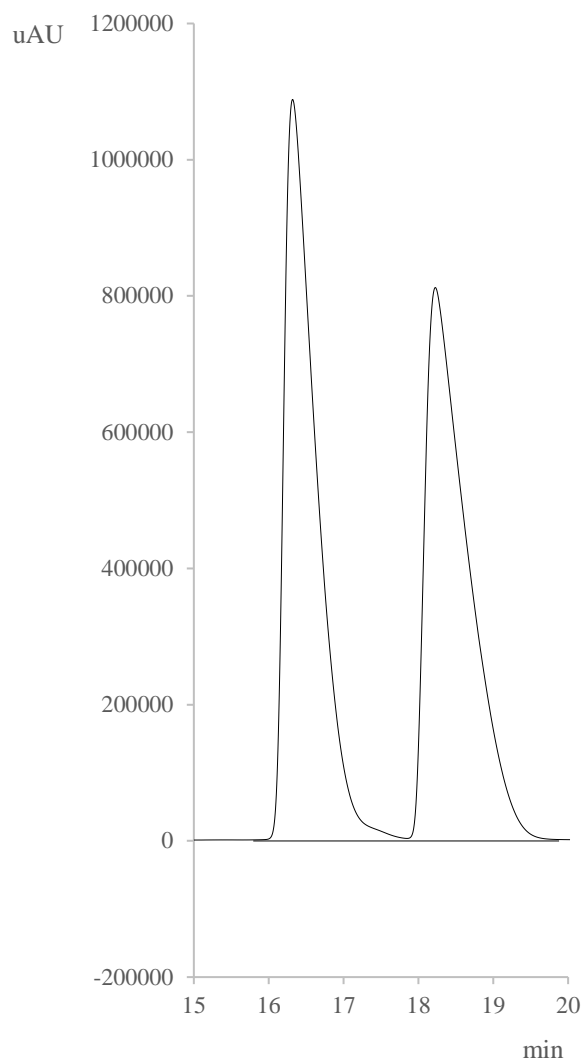

| Peak# | Ret. Time | Area     | Area% |
|-------|-----------|----------|-------|
| 1     | 16.31     | 32399460 | 50.3  |
| 2     | 18.22     | 31961138 | 49.7  |
| total |           | 64360598 | 100   |

(+)-3r

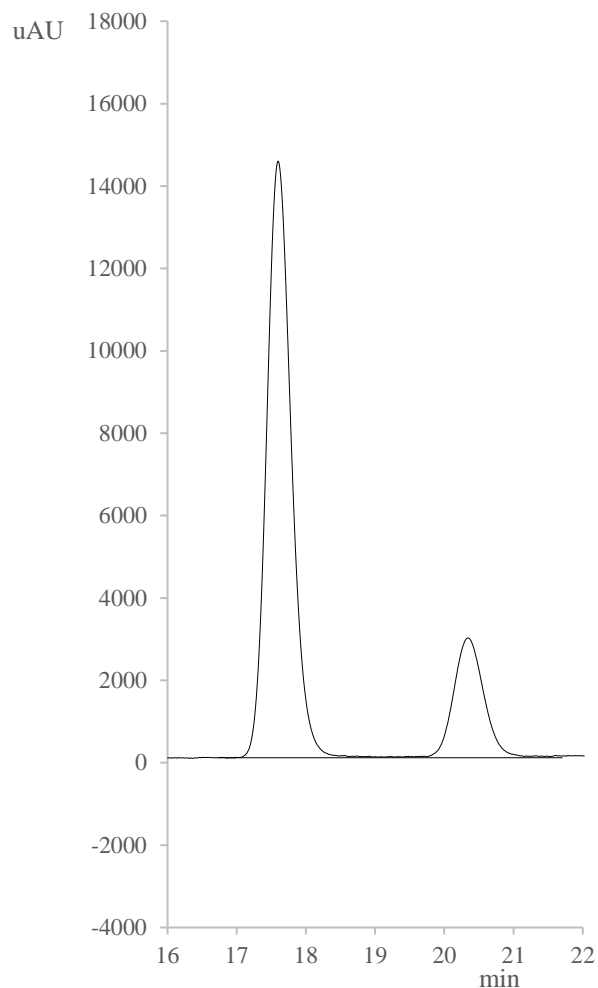

| Peak# | Ret. Time | Area   | Area% |
|-------|-----------|--------|-------|
| 1     | 17.59     | 353744 | 81.4  |
| 2     | 20.34     | 84519  | 18.6  |
| total |           | 438263 | 100   |

### 1-(2-Methoxynaphthalen-1-yl)-2-bromo-[d]imidazole (**3s**) (Table 3)

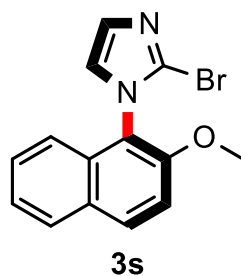

**(+)-1-(2-Methoxynaphthalen-1-yl)-2-bromo-[d]imidazole [(+)-**3s**]:** Following the General Procedure I, a mixture of 2-bromo-imidazole (**1g**) (30 mg, 0.20 mmol), 2-methoxynaphthalene boronic acid (**2a**) (81 mg, 0.40 mmol) and MnO<sub>2</sub> (174 mg, 2.0 mmol) in the Stock Solution (A) [2.0 mL, 0.050 mmol (Cu), 0.10 mmol (**4j**)] was stirred for 22 h at 25 °C. The crude material was purified by column chromatography on silica gel (hexane/EtOAc = 1:1) to afford the titled compound (+)-**3s** (59 mg, 97% isolated yield, 76% ee) as a pale yellow solid.  $[\alpha]_D^{20} = +15.6$  (c 1.0, MeOH). Mp: 104–105 °C. IR: 2941 cm<sup>-1</sup>. <sup>1</sup>H NMR (400 MHz, CDCl<sub>3</sub>)  $\delta$ : 3.91 (3 H, s), 7.08 (1 H, brs), 7.18 (1 H, dd,  $J = 8.5$  Hz), 7.26 (1 H, brs), 7.37–7.43 (2 H, m), 7.47 (1 H, dd,  $J = 7.5, 7.5$  Hz), 7.86 (1 H, d,  $J = 8.0$  Hz), 8.01 (1 H, d,  $J = 9.0$  Hz). <sup>13</sup>C NMR (100 MHz, CDCl<sub>3</sub>)  $\delta$ : 56.5, 113.1, 118.6, 121.1, 121.8, 124.4, 124.5, 128.0, 128.2, 128.5, 130.3, 131.4, 152.9. HRMS (ESI, TOF) Calcd for C<sub>14</sub>H<sub>12</sub>BrN<sub>2</sub>O [M+H]<sup>+</sup>: 303.0133. Found: 303.0121. Rt: (DAICEL CHIRALPAK<sup>®</sup> AD-H, hexane/EtOH/DEA = 90/10/0.1, 1.0 mL/min, 30 °C, 254 nm): 9.65 min (88%), 10.6 min (12%).

**(rac)-1-(2-Methoxynaphthalen-1-yl)-2-bromo-[d]imidazole [(rac)-**3s**]:** Following the General Procedure II, a mixture of 2-bromo-imidazole (**1g**) (30 mg, 0.20 mmol), 2-methoxynaphthalene boronic acid (**2a**) (81 mg, 0.40 mmol) and MnO<sub>2</sub> (174 mg, 2.0 mmol) in the Stock Solution (B) [2.0 mL, 0.050 mmol (Cu), 0.10 mmol (TMEDA)] was stirred for 22 h at 25 °C. The crude material was purified by column chromatography on silica gel (hexane/EtOAc = 1:1) to afford the titled compound (rac)-**3s** (38 mg, 63% isolated yield) as a pale yellow solid. <sup>1</sup>H NMR spectra was identical with chiral one shown above. Rt: (DAICEL CHIRALPAK<sup>®</sup> AD-H, hexane/EtOH/DEA = 90/10/0.1, 1.0 mL/min, 30 °C, 254 nm): 9.71 min (50%), 10.6 min (50%).

# HPLC data of 1-(2-methoxynaphthalen-1-yl)-2-bromo-[d]imidazole (3s)

## 【PDA chromatograms】

(rac)-3s

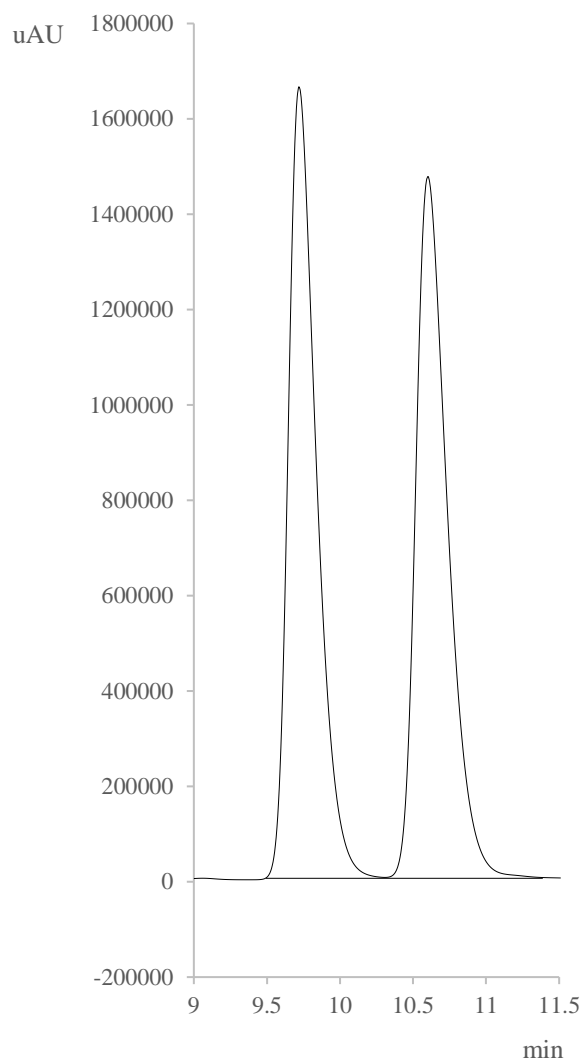

| Peak# | Ret. Time | Area     | Area% |
|-------|-----------|----------|-------|
| 1     | 9.71      | 22494445 | 49.9  |
| 2     | 10.6      | 22614362 | 50.1  |
| total |           | 45108807 | 100   |

(+)-3s

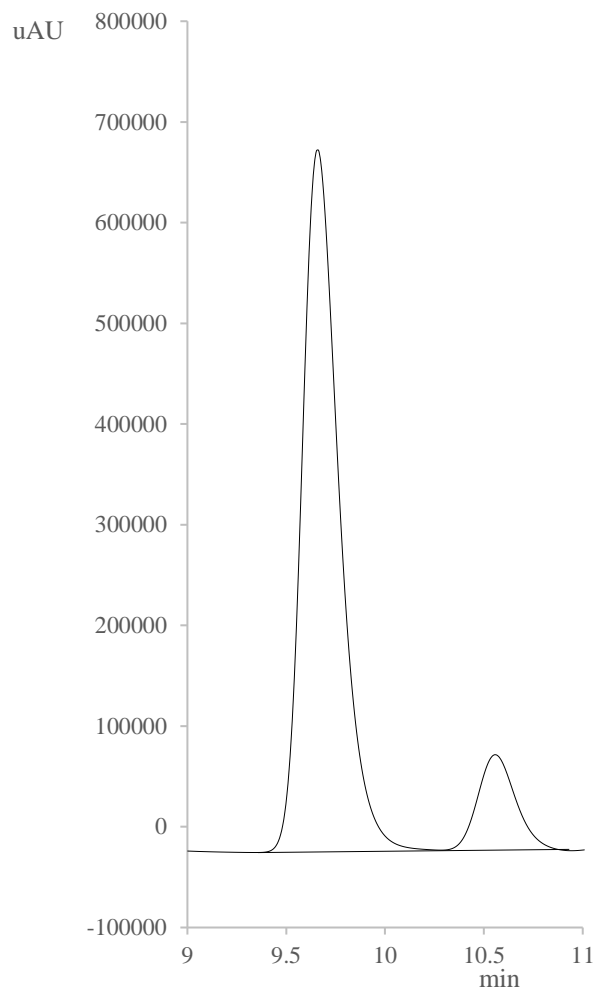

| Peak# | Ret. Time | Area     | Area% |
|-------|-----------|----------|-------|
| 1     | 9.65      | 9124535  | 87.6  |
| 2     | 10.55     | 1297545  | 12.4  |
| total |           | 10422080 | 100   |



### 1-(2-Methoxynaphthalen-1-yl)-2-iodo-[d]imidazole (**3t**) (Table 3)

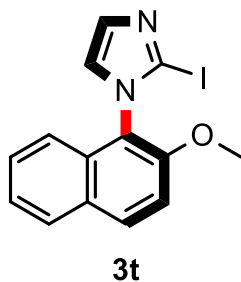

**(+)-1-(2-Methoxynaphthalen-1-yl)-2-iodo-[d]imidazole [(+)-**3t**]:** Following the General Procedure I, a mixture of 2-iodo-imidazole (**1h**) (40 mg, 0.20 mmol), 2-methoxynaphthalene boronic acid (**2a**) (81 mg, 0.40 mmol) and MnO<sub>2</sub> (0.17 g, 20 mmol) in the Stock Solution (A) [2.0 mL, 0.050 mmol (Cu), 0.10 mmol (**4j**)] was stirred for 22 h at 25 °C. The crude material was purified by column chromatography on silica gel (hexane/EtOAc = 1:1) to afford the titled compound (+)-**3t** (64 mg, 91% isolated yield, 62% ee) as a pale yellow solid.  $[\alpha]_D^{20} = +12.2$  (c 1.0, MeOH). Mp: 124–127 °C. IR: 2936 cm<sup>-1</sup>. <sup>1</sup>H NMR (400 MHz, CDCl<sub>3</sub>)  $\delta$ : 3.92 (3 H, s), 7.12 (1 H, d,  $J = 8.0$  Hz), 7.15 (1 H, brs), 7.32 (1 H, brs), 7.38–7.41 (2 H, m), 7.47 (1 H, dd,  $J = 7.5, 7.5$  Hz), 7.87 (1 H, d,  $J = 8.0$  Hz), 8.03 (1 H, d,  $J = 9.0$  Hz). <sup>13</sup>C NMR (100 MHz, CDCl<sub>3</sub>)  $\delta$ : 56.5, 93.0, 113.1, 119.9, 121.3, 124.5, 125.5, 128.0, 128.2, 128.5, 131.4, 131.6, 132.7, 153.0. HRMS (ESI, TOF) Calcd for C<sub>14</sub>H<sub>12</sub>IN<sub>2</sub>O [M+H]<sup>+</sup>: 350.9994. Found: 350.9982. Rt: (DAICEL CHIRALPAK<sup>®</sup> AD-H, hexane/EtOH/DEA = 90/10/0.1, 1.0 mL/min, 30 °C, 254 nm): 12 min (81%), 13.69 min (19%).

**(rac)-1-(2-Methoxynaphthalen-1-yl)-2-iodo-[d]imidazole [(rac)-**3t**]:** Following the General Procedure II, a mixture of 2-iodo-imidazole (**1h**) (40 mg, 0.20 mmol), 2-methoxynaphthalene boronic acid (**2a**) (81 mg, 0.40 mmol) and MnO<sub>2</sub> (174 mg, 2.0 mmol) in the Stock Solution (B) [2.0 mL, 0.050 mmol (Cu), 0.10 mmol (TMEDA)] was stirred for 22 h at 25 °C. The crude material was purified by column chromatography on silica gel (hexane/EtOAc = 1:1) to afford the titled compound (rac)-**3t** (11 mg, 16% isolated yield) as a pale yellow solid. <sup>1</sup>H NMR spectra was identical with chiral one shown above. Rt: (DAICEL CHIRALPAK<sup>®</sup> AD-H, hexane/EtOH/DEA = 90/10/0.1, 1.0 mL/min, 30 °C, 254 nm): 12.04 min (50%), 13.66 min (50%).

# HPLC data of 1-(2-methoxynaphthalen-1-yl)-2-iodo-[d]imidazole (3t)

## 【PDA chromatograms】

(rac)-3t

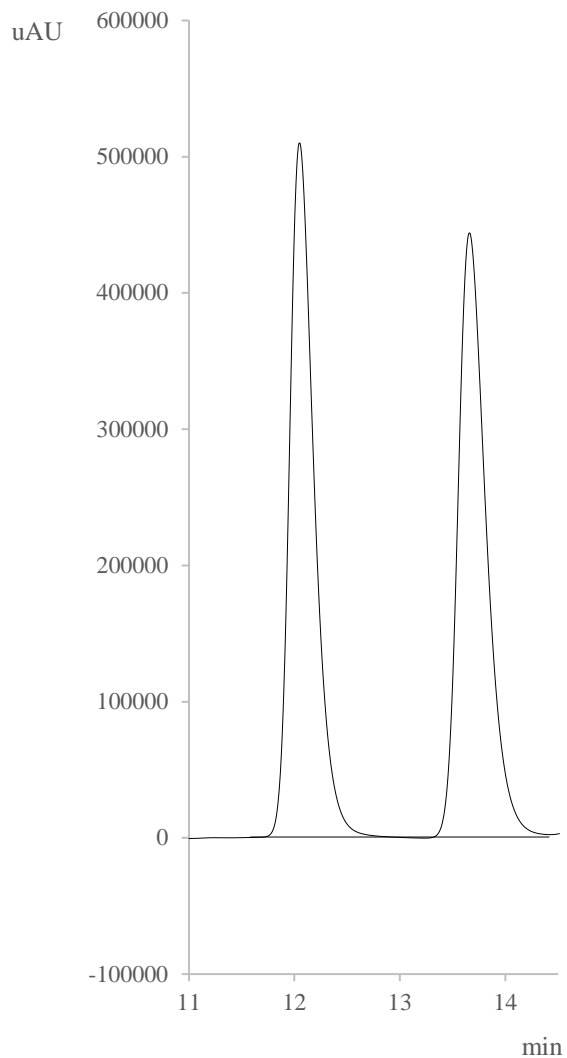

| Peak# | Ret. Time | Area     | Area% |
|-------|-----------|----------|-------|
| 1     | 12.04     | 8405501  | 50.2  |
| 2     | 13.66     | 8343629  | 49.8  |
| total |           | 16749130 | 100   |

(+)-3t

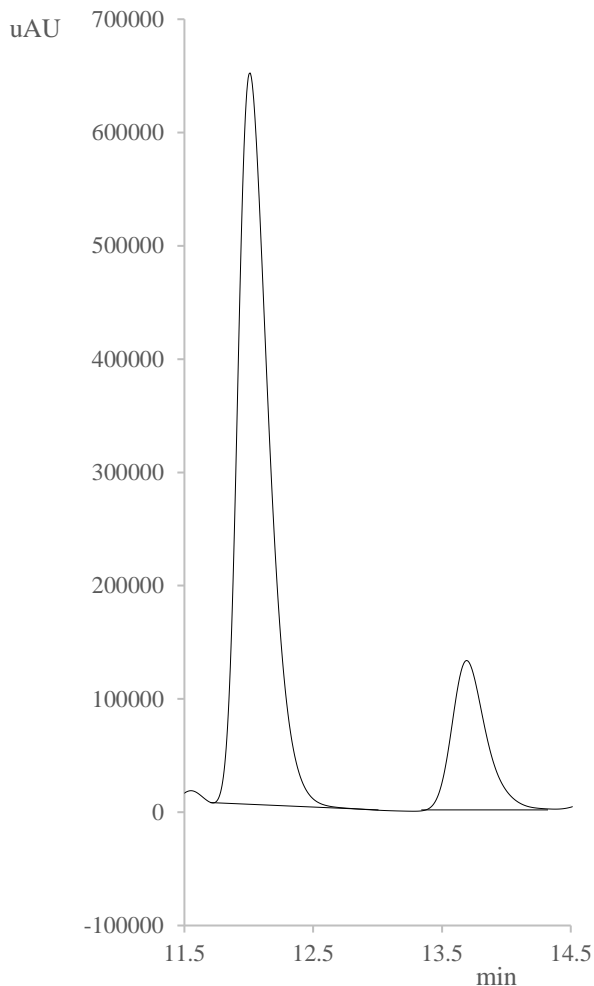

| Peak# | Ret. Time | Area     | Area% |
|-------|-----------|----------|-------|
| 1     | 12        | 10832802 | 81.5  |
| 2     | 13.69     | 2416992  | 18.5  |
| total |           | 13249794 | 100   |

### 1-(2-Methoxynaphthalen-1-yl)-2-trifluoro-[d]imidazole (**3u**)

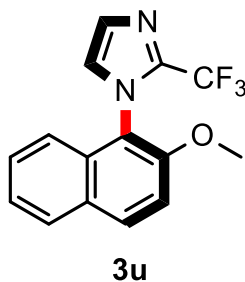

**(+)-1-(2-Methoxynaphthalen-1-yl)-2-trifluoro-[d]imidazole [(+)-**3u**]:** Following the General Procedure I, a mixture of 2-trifluoro-imidazole (**1i**) (28 mg, 0.20 mmol), 2-methoxynaphthalene boronic acid (**2a**) (81 mg, 0.40 mmol) and MnO<sub>2</sub> (174 mg, 2.0 mmol) in the Stock Solution (A) [2.0 mL, 0.050 mmol (Cu), 0.10 mmol (**4j**)] was stirred for 22 h at 25 °C. The crude material was purified by column chromatography on silica gel (hexane/EtOAc = 1:1) to afford the titled compound (+)-**3u** (64 mg, 91% isolated yield, 64% ee) as a pale yellow solid.  $[\alpha]_D^{20} = +13.0$  (c 1.0, MeOH). Mp: 78–79 °C. IR: 2944 cm<sup>-1</sup>. <sup>1</sup>H NMR (400 MHz, CDCl<sub>3</sub>)  $\delta$ : 3.91 (3 H, s), 7.08 (1 H, brd,  $J = 1.5$  Hz), 7.11 (1 H, d,  $J = 8.0$  Hz), 7.37–7.44 (3 H, m), 7.48 (1 H, dd,  $J = 7.5, 7.5$  Hz), 7.87 (1 H, d,  $J = 8.0$  Hz), 8.02 (1 H, d,  $J = 9.0$  Hz). <sup>13</sup>C NMR (100 MHz, CDCl<sub>3</sub>)  $\delta$ : 56.3, 112.7, 117.7, 118.6 (q,  $J = 270.0$  Hz), 120.7, 124.5, 1225.5, 127.9, 128.3, 129.1, 131.4, 131.7, 137.4 (q,  $J = 39.5$  Hz), 152.8. <sup>19</sup>F NMR (471 MHz, CDCl<sub>3</sub>)  $\delta$ : -62.7. HRMS (ESI, TOF) Calcd for C<sub>15</sub>H<sub>12</sub>F<sub>3</sub>N<sub>2</sub>O [M+H]<sup>+</sup>: 293.0902. Found: 293.0892. Rt: (DAICEL CHIRALPAK<sup>®</sup> IB-N, hexane/EtOH/DEA = 98/2/0.1, 1.0 mL/min, 30 °C, 254 nm): 11.1 min (82%), 12.0 min (18%).

**(rac)-1-(2-Methoxynaphthalen-1-yl)-2-iodo-[d]imidazole [(rac)-**3u**]:** Following the General Procedure II, a mixture of 2-iodo-imidazole (**1h**) (68 mg, 0.50 mmol), 2-trifluoro-imidazole (**1i**) (0.20 g, 1.0 mmol) and MnO<sub>2</sub> (0.44 g, 5.0 mmol) in the Stock Solution (B) [5.0 mL, 0.13 mmol (Cu), 0.25 mmol (TMEDA)] was stirred for 22 h at 25 °C. The crude material was purified by column chromatography on silica gel (hexane/EtOAc = 1:1) to afford the titled compound (rac)-**3u** (150 mg, 85% isolated yield) as a pale yellow solid. <sup>1</sup>H NMR spectra was identical with chiral one shown above. Rt: (DAICEL CHIRALPAK<sup>®</sup> IB-N, hexane/EtOH/DEA = 98/2/0.1, 1.0 mL/min, 30 °C, 254 nm): 10.99 min (50%), 11.88 min (50%).

## HPLC data of 1-(2-methoxynaphthalen-1-yl)- 2-trifluoro-[d]imidazole (3u)

### 【PDA chromatograms】

(rac)-3u

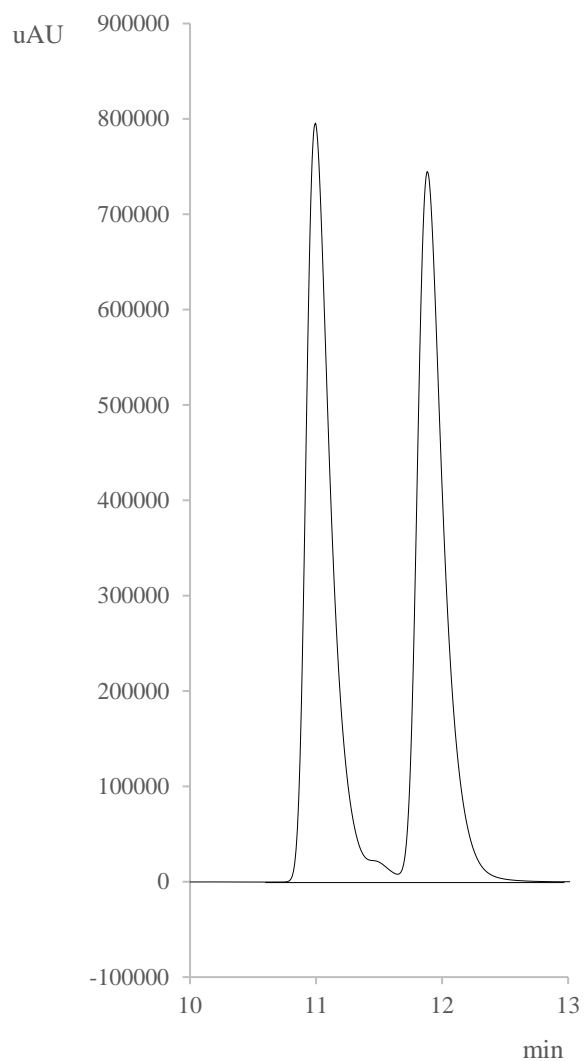

| Peak# | Ret. Time | Area     | Area% |
|-------|-----------|----------|-------|
| 1     | 10.99     | 11139901 | 50.4  |
| 2     | 11.88     | 10967077 | 49.6  |
| total |           | 22106978 | 100   |

(+)-3u

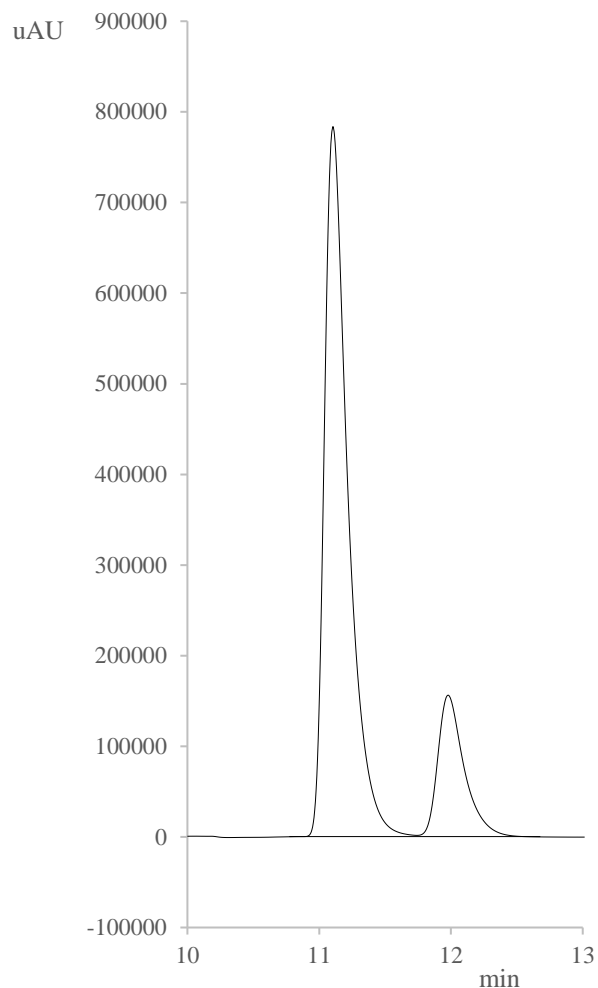

| Peak# | Ret. Time | Area     | Area% |
|-------|-----------|----------|-------|
| 1     | 11.1      | 9808099  | 81.7  |
| 2     | 12        | 2204107  | 18.3  |
| total |           | 12012206 | 100   |

### 1-(2-Methoxynaphthalen-1-yl)-benzo[d]imidazole (**3w**)

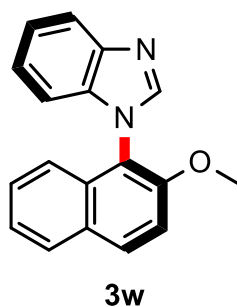

**(S)-1-(2-Methoxynaphthalen-1-yl)-benzo[d]imidazole [(S)-**3w**]:** Following the General Procedure I, a mixture of benzimidazole (**1**) (24 mg, 0.20 mmol), 2-methoxynaphthalene boronic acid (**2a**) (81 mg, 0.40 mmol) and MnO<sub>2</sub> (174 mg, 2.0 mmol) in the Stock Solution (A) [2.0 mL, 0.050 mmol (Cu), 0.10 mmol (**4j**)] was stirred for 22 h at 25 °C. The crude material was purified by column chromatography on silica gel (hexane/EtOAc = 2:1) to afford the titled compound (*S*)-**3w** (53 mg, quant, 6% ee) as a colorless solid.  $[\alpha]_D^{20} = +16.7$  (c 1.0, MeOH). Mp: 155–156 °C. IR: 2931 cm<sup>-1</sup>. <sup>1</sup>H NMR (400 MHz, CDCl<sub>3</sub>) δ: 3.84 (3 H, s), 6.96 (1 H, d, *J* = 8.0 Hz), 7.19–7.24 (2 H, m), 7.34 (1 H, dd, *J* = 7.5, 7.5 Hz), 7.37–7.42 (2 H, m), 7.45 (1 H, d, *J* = 9.0 Hz), 7.91 (1 H, d, *J* = 8.0 Hz), 7.95 (1 H, d, *J* = 8.0 Hz), 8.03–8.06 (2 H, m). <sup>13</sup>C NMR (100 MHz, CDCl<sub>3</sub>) δ: 56.5, 110.8, 113.3, 117.3, 120.2, 121.6, 122.3, 123.2, 124.5, 128.0, 128.1, 128.8, 131.0, 131.5, 135.2, 143.3, 144.7, 153.2. HRMS (ESI, TOF) Calcd for C<sub>18</sub>H<sub>15</sub>N<sub>2</sub>O [M+H]<sup>+</sup>: 275.1184. Found: 275.1182. Rt: (DAICEL-CHIRALPAK<sup>®</sup> IB-N, hexane/*i*-PrOH = 5/1, 1.0 mL/min, 30 °C, 254 nm): 8.9 min (53%), 15.8 min (47%).

**(rac)-1-(2-Methoxynaphthalen-1-yl)-benzo[d]imidazole [(rac)-**3w**]:** Following the General Procedure II, a mixture of benzimidazole (**1**) (0.48 g, 4.0 mmol), 2-methoxynaphthalen boronic acid (**2a**) (1.6 g, 8.0 mmol) and MnO<sub>2</sub> (3.5 g, 40 mmol) in the Stock Solution (B) [4.0 mL, 0.10 mmol (Cu), 0.20 mmol (TMEDA)] was stirred for 22 h at 25 °C. The crude material was purified by column chromatography on silica gel (hexane/EtOAc = 2:1) to afford the titled compound (*rac*)-**3w** as a colorless solid (1.1 g, 99% isolated yield). <sup>1</sup>H NMR spectra was identical with chiral one shown above. Rt: (DAICEL CHIRALPAK<sup>®</sup> IB-N, hexane/*i*-PrOH = 5/1, 1.0 mL/min, 30 °C, 254 nm): 9.0 min (5%), 16.4 min (47%).

## HPLC data of 1-(2-methoxynaphthalen-1-yl)-benzo[d]imidazole (3w)

### 【PDA chromatograms】

(rac)-3w

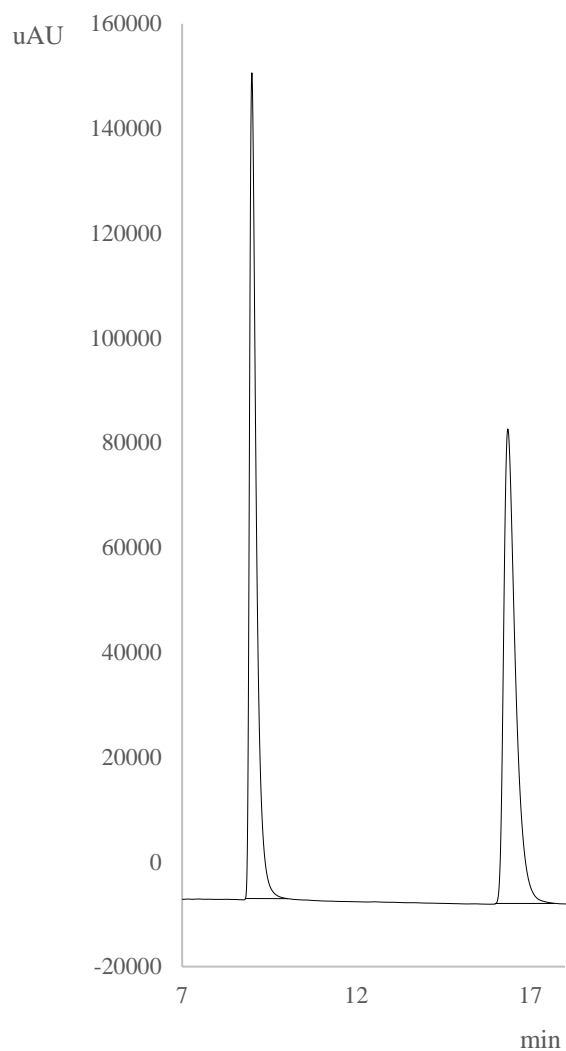

| Peak# | Ret. Time | Area    | Area% |
|-------|-----------|---------|-------|
| 1     | 9         | 2156844 | 50.27 |
| 2     | 16.35     | 2133319 | 49.73 |
| total |           | 4290163 | 100   |

(S)-3w

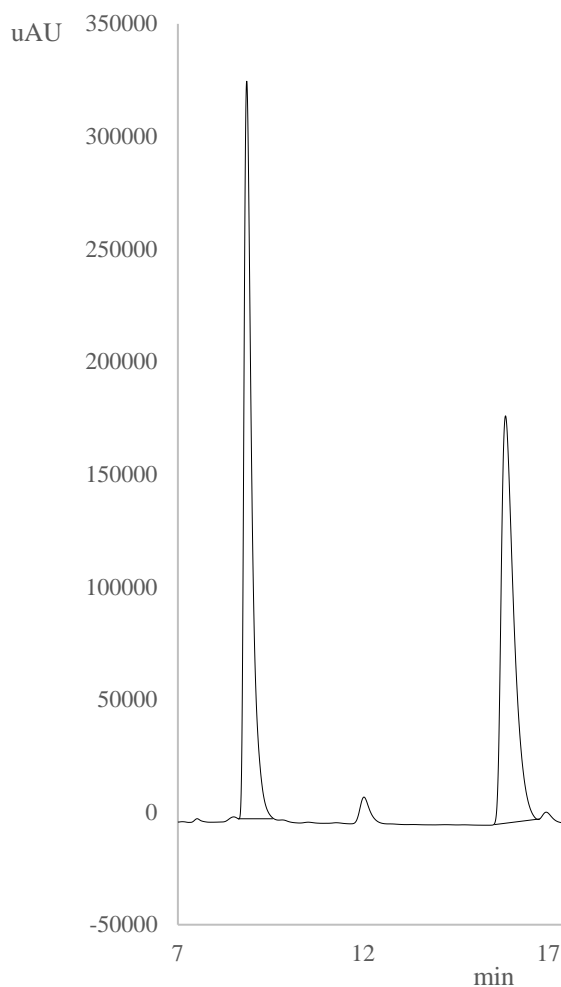

| Peak# | Ret. Time | Area    | Area% |
|-------|-----------|---------|-------|
| 1     | 8.86      | 4753528 | 52.55 |
| 2     | 15.84     | 4292947 | 47.45 |
| total |           | 9046475 | 100   |

#### **4. Transformation of 1-(2-methoxynaphthalen-1-yl)-2-bromo-benzo[*d*]imidazole (3b) prepared by the asymmetric Chan-Lam coupling**

##### **4-1. Recrystallization of 1-(2-methoxynaphthalen-1-yl)-2-bromo-benzo[*d*]imidazole (3b):**

**3b**, 85% ee (0.77 g, 2.2 mmol) and hexane (20 mL) were charged in a 50 mL recovery flask. The suspension was heated at 70 °C and EtOAc (10 mL) was added dropwise into the flask at 70 °C until the suspension became a clear solution. The mixture was gradually cooled to room temperature and left overnight. The mixture was filtered to afford **3b**, >99% ee (0.42 mg, 55%) as a colorless solid.

**HPLC data of (S)-1-(2-methoxynaphthalen-1-yl)-2-bromo-benzo[d]imidazole, [(S)-3b] after the recrystallization**

**【PDA chromatograms】**

*(rac)*-3b

*(S)*-3b

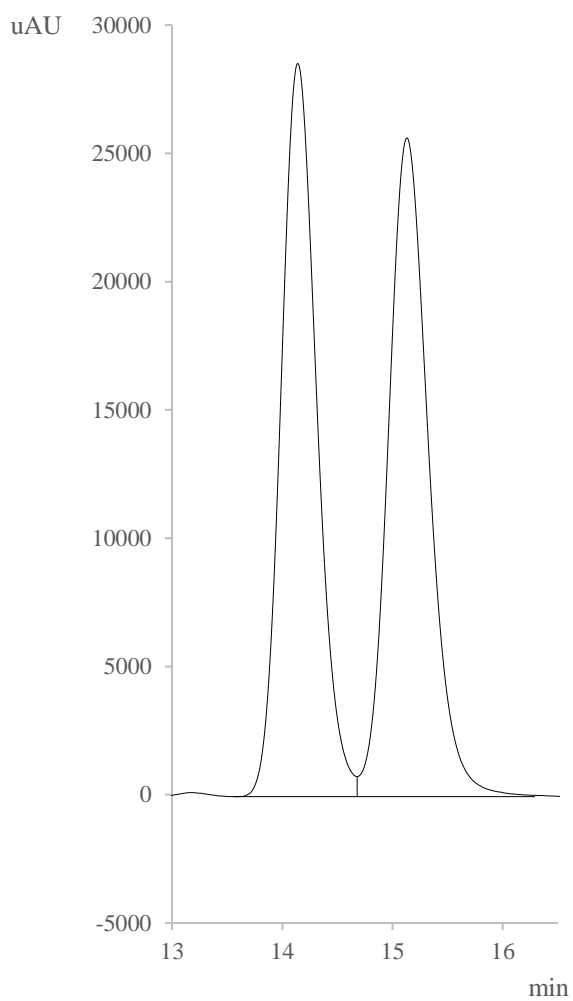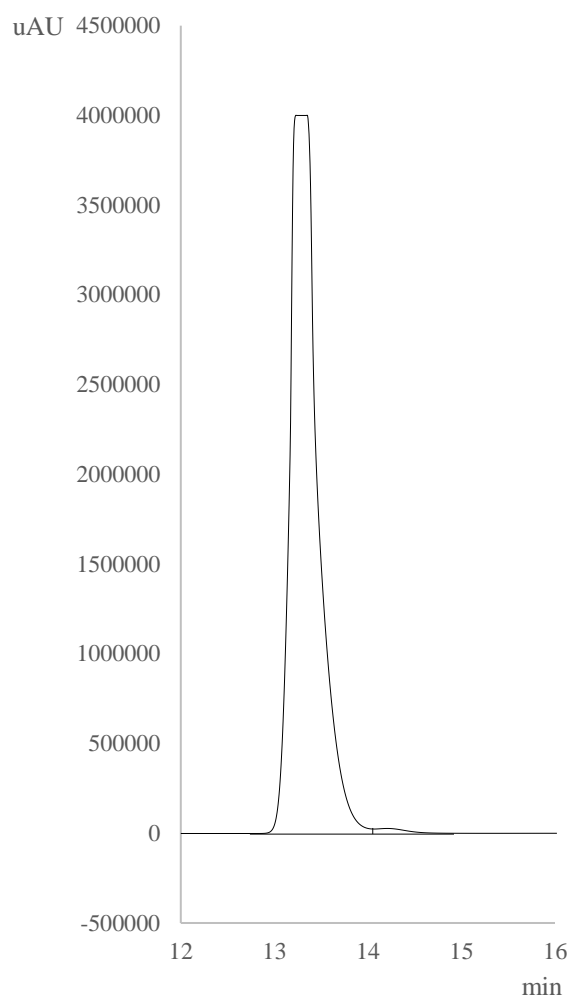

| Peak# | Ret. Time | Area    | Area% |
|-------|-----------|---------|-------|
| 1     | 14.134    | 646813  | 49.78 |
| 2     | 15.125    | 652606  | 50.22 |
| total |           | 1299419 | 100   |

| Peak# | Ret. Time | Area     | Area% |
|-------|-----------|----------|-------|
| 1     | 13.344    | 84199384 | 99.86 |
| 2     | 14.202    | 115010   | 0.14  |
| total |           | 84314394 | 100   |



## 4-2. Suzuki coupling

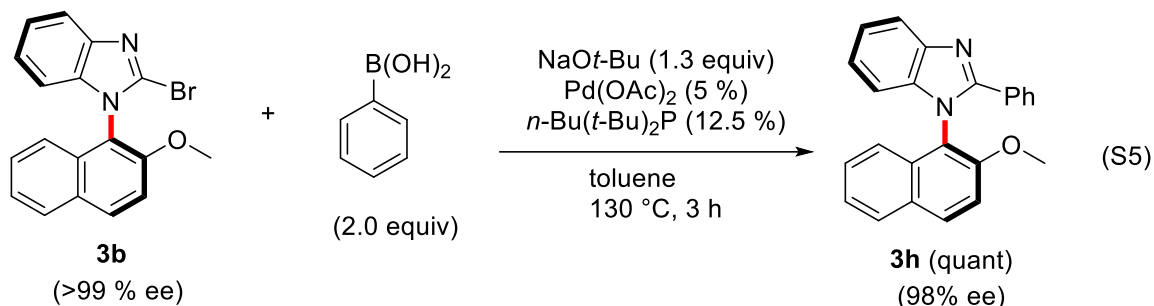

### (S)-1-(2-Methoxynaphthalen-1-yl)-2-phenyl-benzo[d]imidazole [(S)-3h]:

(S)-**3b**, >99% ee (35 mg, 0.10 mmol), phenyl boronic acid (24 mg, 0.20 mmol),  $\text{Pd(OAc)}_2$  (1.1 mg, 5.0 %),  $n\text{-Bu}(t\text{-Bu)}_2\text{P}\cdot\text{HBF}_4$  (3.6 mg, 12.5 %) and  $t\text{-BuONa}$  (13 mg, 0.15 mmol) were added to an oven-dried Schlenk flask. The flask was equipped with a rubber septum and evacuated and back-filled with nitrogen (this process was repeated three times). After anhydrous toluene (1.0 mL) was added via a syringe, the septum was replaced with a Teflon screw cap under a flow of nitrogen and the cap was tightly closed. The reaction mixture was stirred for 3 h at 130 °C and passed through Celite with EtOAc. The filtrate was concentrated in vacuo. The purification of the crude product with a silica gel (hexane/EtOAc = 1:1) to afford the titled compound (S)-**3h** (43 mg, quant, 98% ee) as colorless solid.  $[\alpha]_{\text{D}}^{20} = +68.7$  (c 1.0, MeOH). Mp: 78–79 °C.  $^1\text{H NMR}$  (400 MHz,  $\text{CDCl}_3$ )  $\delta$ : 3.57 (3 H, s), 6.81 (1 H, d,  $J = 8.0$  Hz), 7.14–7.18 (3 H, m), 7.22–7.26 (1 H, m), 7.29–7.35 (3 H, m), 7.39–7.43 (2 H, m), 7.53 (2 H, d,  $J = 7.5$  Hz), 7.89–7.92 (1 H, m), 7.95 (1 H, d,  $J = 8.0$  Hz), 8.00 (1 H, d,  $J = 9.0$  Hz). Rt: (DAICEL CHIRALPAK<sup>®</sup> IK-3, hexane/*i*-PrOH = 95/5, 1.0 mL/min, 30 °C, 254 nm): 21.5 min (0.9%), 25.9 min (99.1%).

**HPLC data of 1-(2-methoxynaphthalen-1-yl)-2-phenyl-benzo[*d*]imidazole (3h) prepared by the Suzuki coupling**

**【PDA chromatograms】**

*(rac)*-3h

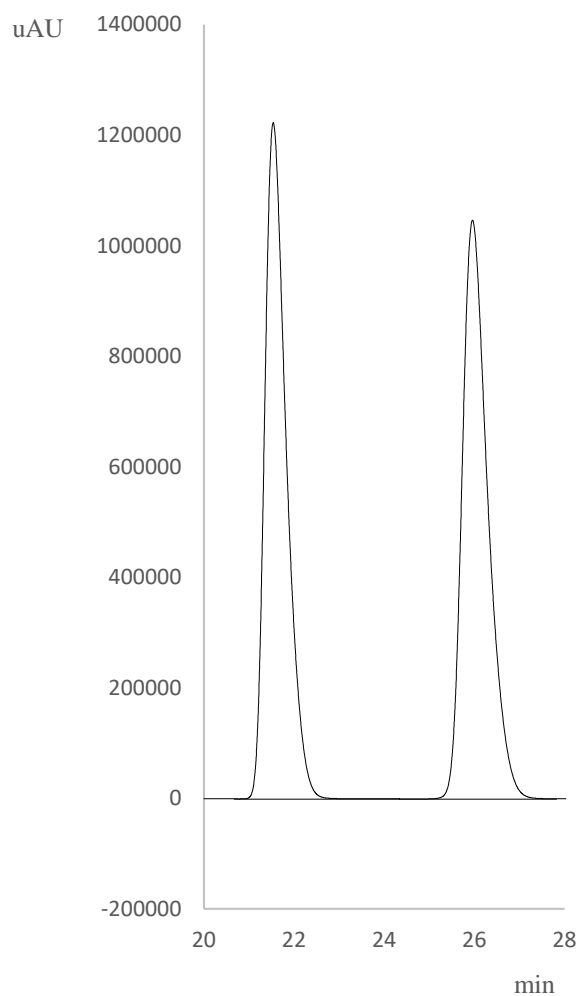

| Peak# | Ret. Time | Area     | Area% |
|-------|-----------|----------|-------|
| 1     | 21.54     | 40655573 | 49.55 |
| 2     | 25.963    | 41391469 | 50.45 |
| total |           | 82047042 | 100   |

*(S)*-3h

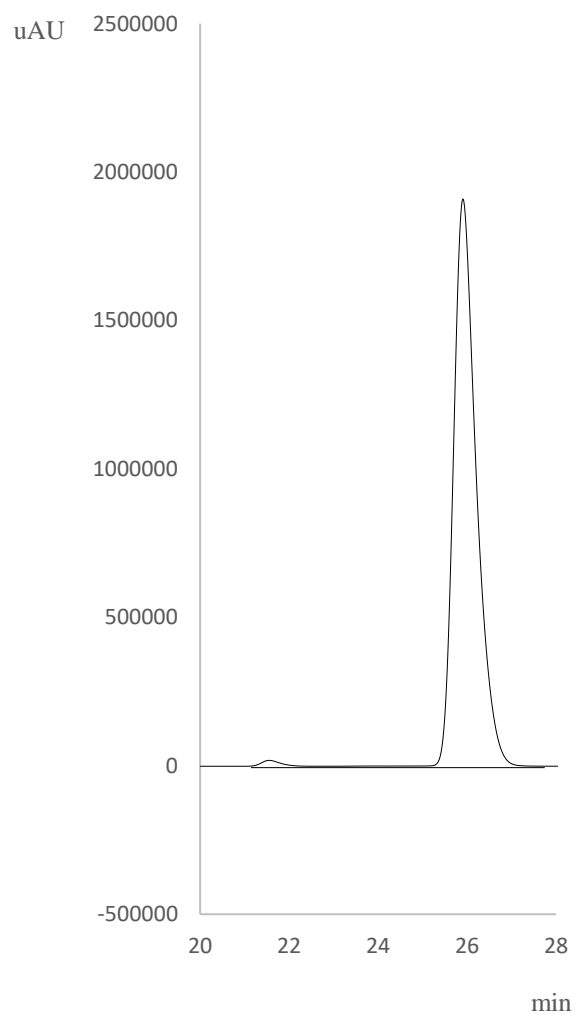

| Peak# | Ret. Time | Area     | Area% |
|-------|-----------|----------|-------|
| 1     | 21.55     | 612369   | 0.85  |
| 2     | 25.907    | 67792268 | 99.15 |
| total |           | 68404637 | 100   |

### 4-3. Sonogashira coupling

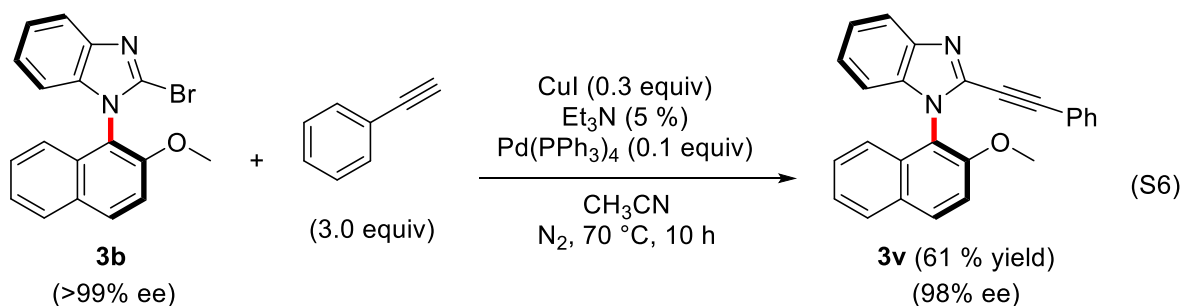

#### **(S)-1-(2-Methoxynaphthalen-1-yl)-2-phenyl-benzo[d]imidazole [(S)-3v]:**

(*S*)-**3b**, >99% ee (71 mg, 0.20 mmol), CuI (11 mg, 0.060 mmol) and Pd(PPh<sub>3</sub>)<sub>4</sub> (23 mg, 0.020 mmol) were charged in an oven-dried Schlenk flask. The flask was equipped with a rubber septum and evacuated and back-filled with nitrogen (this process was repeated three times). After ethynylbenzene (66  $\mu$ L, 0.60 mmol), triethylamine (83  $\mu$ L, 0.60 mmol) and anhydrous CH<sub>3</sub>CN (1.0 mL) was added to the flask, the septum was replaced with a Teflon screw cap under a flow of nitrogen and the cap was tightly closed. The reaction mixture was stirred for 10 h at 70 °C and passed through Celite with EtOAc. The filtrate was concentrated in vacuo. The purification of the crude product with a silica gel (hexane/EtOAc = 4:1) to afford the titled compound (*S*)-**3v** (46 mg, 61% isolated yield, >99% ee) as colorless solid.  $[\alpha]_{\text{D}}^{20} = -56.3$  (c 0.84, MeOH). Mp: 95–97 °C. IR: 2218, 2924 cm<sup>-1</sup>. <sup>1</sup>H NMR (400 MHz, CDCl<sub>3</sub>)  $\delta$ : 3.85 (3 H, s), 6.92 (1 H, d,  $J = 8.0$  Hz), 7.06–7.08 (2 H, m), 7.17–7.20 (2 H, m), 7.22–7.27 (3 H, m), 7.34–7.43 (3 H, m), 7.48 (1 H, d,  $J = 9.0$  Hz), 7.92–7.94 (2 H, m), 8.09 (1 H, d,  $J = 9.0$  Hz). <sup>13</sup>C NMR (100 MHz, CDCl<sub>3</sub>)  $\delta$ : 56.5, 79.5, 93.6, 110.7, 113.4, 117.0, 120.1, 121.2, 121.8, 123.0, 124.1, 124.4, 127.9, 128.1, 128.2, 128.8, 129.2, 131.3, 131.5, 131.7, 135.8, 138.7, 143.1, 153.6. HRMS (ESI, TOF) Calcd for C<sub>26</sub>H<sub>19</sub>N<sub>2</sub>O [M+H]<sup>+</sup>: 375.1497. Found: 375.1497. Rt: (DAICEL CHIRALCEL<sup>®</sup> OJ-H, hexane/EtOH/DEA = 90/10/0.1, 1.0 mL/min, 30 °C, 254 nm): 8.5 min (<0.5%), 10.2 min (>99.5%).

#### **(rac)-1-(2-Methoxynaphthalen-1-yl)-2-phenyl-benzo[d]imidazole [(rac)-3v]:**

(*rac*)-**3b** (71 mg, 0.20 mmol), CuI (11 mg, 0.060 mmol) and Pd(PPh<sub>3</sub>)<sub>4</sub> (23 mg, 0.020 mmol) were added to an oven-dried Schlenk flask. The flask was equipped with a rubber septum and evacuated

and back-filled with nitrogen (this process was repeated three times). After ethynyl benzene (66  $\mu$ L, 0.60 mmol), triethylamine (83  $\mu$ L, 0.60 mmol) and anhydrous  $\text{CH}_3\text{CN}$  (1.0 mL) was added to the flask, the septum was replaced with a Teflon screw cap under a flow of nitrogen and the cap was tightly closed. The reaction mixture was stirred for 10 h at 70  $^\circ\text{C}$  and passed through Celite with EtOAc. The filtrate was concentrated in vacuo. The purification of the crude product with a silica gel (hexane/EtOAc = 4:1) to afford the titled compound (*rac*)-**3v** (46 mg, 61% isolated yield) as colorless solid. Rt: (DAICEL CHIRALCEL<sup>®</sup> OJ-H, hexane/*i*-PrOH = 95/5, 1.0 mL/min, 30  $^\circ\text{C}$ , 254 nm): 8.5 min (50%), 10.2 min (50%).

**HPLC data of 1-(2-methoxynaphthalen-1-yl)-2-phenyl-benzo[*d*]imidazole (3v) prepared by the Sonogashira coupling**

**【PDA chromatograms】**

*(rac)*-3v

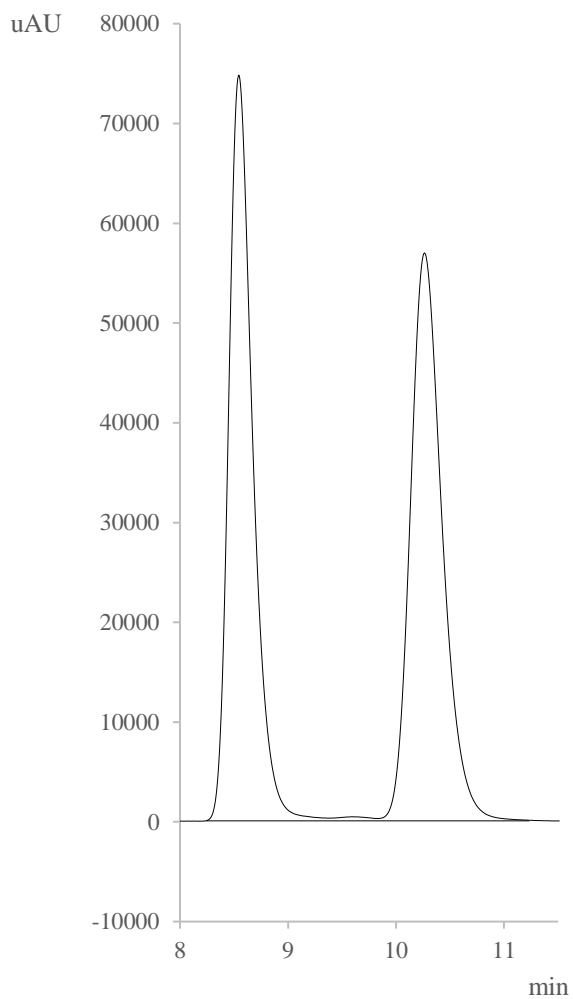

| Peak# | Ret. Time | Area  | Area% |
|-------|-----------|-------|-------|
| 1     | 9.573     | 26810 | 49.86 |
| 2     | 11.768    | 26963 | 50.14 |
| total |           | 53773 | 100   |

*(S)*-3v

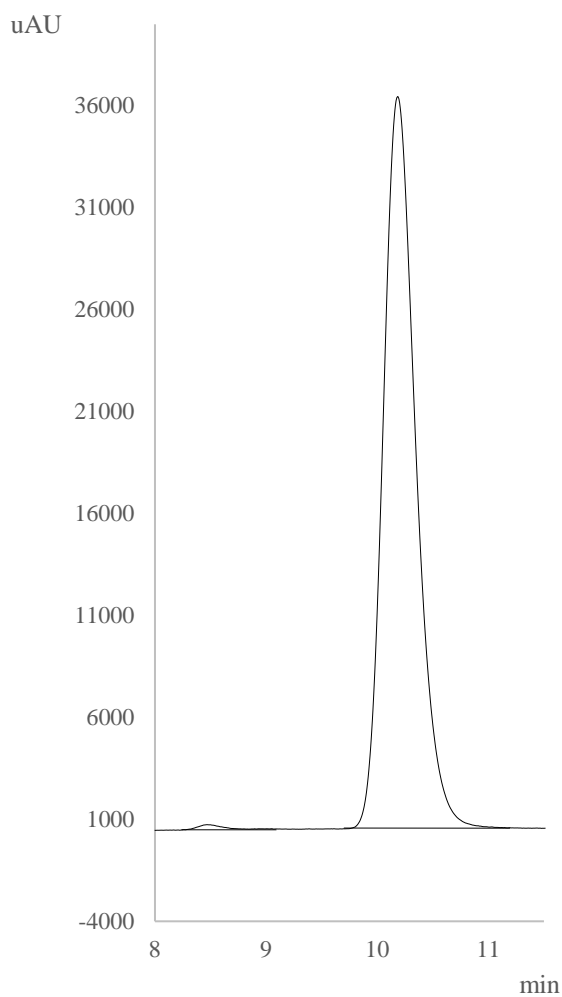

| Peak# | Ret. Time | Area    | Area% |
|-------|-----------|---------|-------|
| 1     | 8.465     | 3466    | 0.47  |
| 2     | 10.18     | 731848  | 99.53 |
| total |           | 3877710 | 100   |

#### 4-4. Reductive dehalogenation

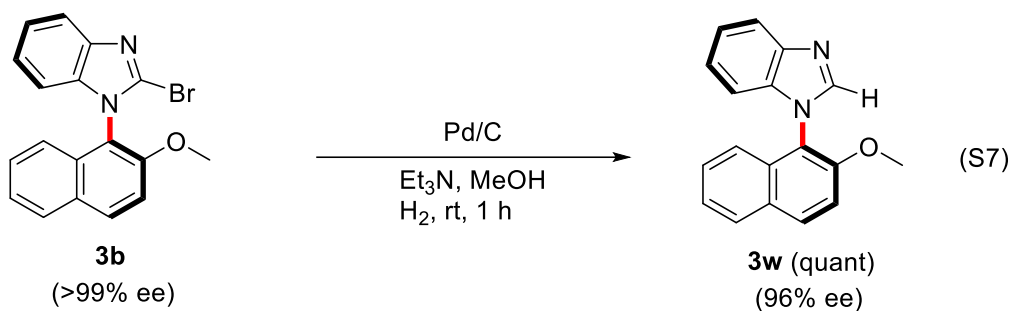

#### (S)-1-(2-Methoxynaphthalen-1-yl)-benzo[d]imidazole [(S)-3w]:

To a test tube were added (*S*)-**3b**, >99% ee (35 mg, 0.10 mmol), 10% Pd/C (7.1 mg, 10wt%, 0.060 mmol), triethylamine (84  $\mu$ L, 0.60 mmol). After MeOH (2.0 mL) was added to the test tube, the mixture was evacuated and backfilled with H<sub>2</sub> (This operation was repeated three times). The reaction mixture was stirred under H<sub>2</sub> atmosphere (balloon) at 25 °C for 1 h and passed through Celite with EtOAc. To the obtained mixture was poured water (ca. 10 mL) and EtOAc (ca. 40 mL), and then the aqueous phase was washed three times with EtOAc. The EtOAc solution was washed with brine, dried over anhydrous magnesium sulfate, and evaporated to afford the titled compound (*S*)-**3w** (64 mg, quant, 96% ee) as a colorless solid.  $[\alpha]_D^{20} = +95.5$  (c 1.0, MeOH). Mp: 158–160 °C. <sup>1</sup>H NMR (400 MHz, CDCl<sub>3</sub>)  $\delta$ : 3.84 (3 H, s), 6.96 (1 H, d,  $J = 8.0$  Hz), 7.19–7.24 (2 H, m), 7.34 (1 H, dd,  $J = 8.0, 8.0$  Hz), 7.37–7.43 (2 H, m), 7.45 (1 H, d,  $J = 9.0$  Hz), 7.91 (1 H, d,  $J = 8.0$  Hz), 7.95 (1 H, d,  $J = 8.0$  Hz), 8.03–8.05 (2 H, m). Rt: (DAICEL CHIRALCEL<sup>®</sup> OJ-H, hexane/*i*-PrOH/DEA = 90/10/0.1, 1.0 mL/min, 30 °C, 254 nm): 14.9 min (98%), 23.9 min (2%).

**HPLC data of 1-(2-methoxynaphthalen-1-yl)-benzo[*d*]imidazole (3w) prepared by the reductive debromination using Pd/C**

**【PDA chromatograms】**

*(rac)*-3w

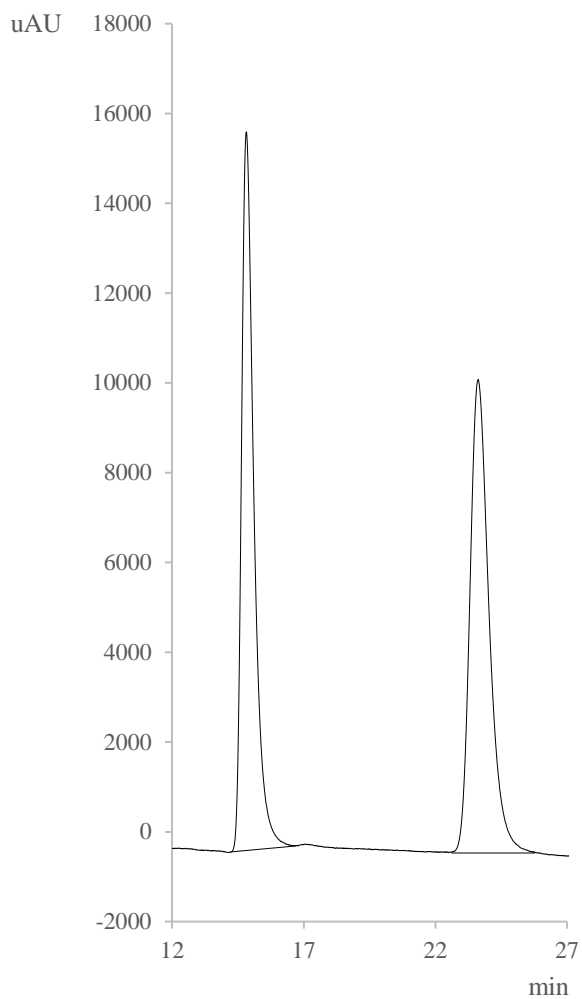

*(S)*-3w

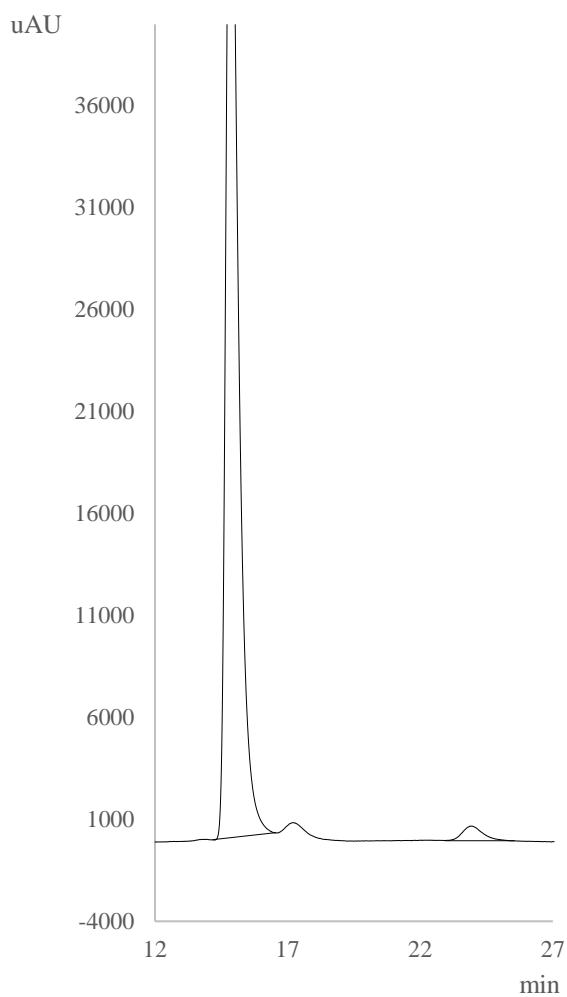

| Peak# | Ret. Time | Area    | Area% |
|-------|-----------|---------|-------|
| 1     | 14.811    | 522735  | 50.16 |
| 2     | 23.619    | 519433  | 49.84 |
| total |           | 1042168 | 100   |

| Peak# | Ret. Time | Area    | Area% |
|-------|-----------|---------|-------|
| 1     | 14.846    | 1747584 | 98.4  |
| 2     | 23.87     | 28538   | 1.6   |
| total |           | 3877710 | 100   |

#### 4-5. Metallative methylation

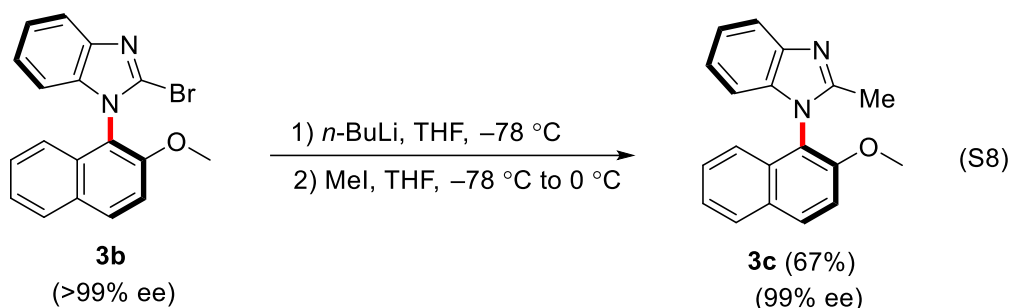

#### (*S*)-1-(2-Methoxynaphthalen-1-yl)-2-methyl-benzo[*d*]imidazole [(*S*)-3c]:

(*S*)-**3b**, >99% ee (26 mg, 0.075 mmol) and anhydrous THF (1.0 mL) were charged in a 20 mL flask. After stirring for 15 min at  $-78\text{ }^{\circ}\text{C}$ , *n*-butyllithium (ca. 2.6 mol/L in hexane) (34  $\mu\text{L}$ , 0.090 mol) was added dropwise into the flask and stirred for 1 h at  $-78\text{ }^{\circ}\text{C}$ . Iodomethane (11  $\mu\text{L}$ , 0.11 mmol) was added dropwisely to the mixture at  $-78\text{ }^{\circ}\text{C}$  and stirred overnight at room temperature. To the reaction mixture was added water (0.50 mL) and ethylenediamine (0.50 mL), and the reaction mixture was stirred at room temperature for 15 min. To the obtained mixture was poured EtOAc (10 mL), and then the aqueous phase was washed three times with EtOAc. The combined organic phases was washed with brain and evaporated. The purification of the crude product with a silica gel (hexane/EtOAc = 2:1) to afford the titled compound. The mixture was evaporated to afford the titled compound (*S*)-**3c** (14 mg, 67 % isolated yield, 99% ee) as a colorless solid.  $[\alpha]_{\text{D}}^{20} = +115.2$  (c 0.60, MeOH). Mp: 29–30  $^{\circ}\text{C}$ .  $^1\text{H NMR}$  (400 MHz,  $\text{CDCl}_3$ )  $\delta$ : 2.36 (3 H, s), 3.85 (3 H, s), 6.78 (1 H, d,  $J = 8.0$  Hz), 7.08 (1 H, d,  $J = 8.5$  Hz), 7.13 (1 H, dd,  $J = 7.5, 7.5$  Hz), 7.28 (1 H, dd,  $J = 8.0, 8.0$  Hz), 7.37–7.44 (2 H, m), 7.47 (1 H, d,  $J = 9.0$  Hz), 7.83 (1 H, d,  $J = 8.0$  Hz), 7.93 (1 H, d,  $J = 8.5$  Hz), 8.07 (1 H, d,  $J = 8.5$  Hz). Rt: (DAICEL CHIRALCEL<sup>®</sup> OJ-H, hexane/EtOH/DEA = 90/10/0.1, 1.0 mL/min, 30  $^{\circ}\text{C}$ , 254 nm): 8.2 min (>99%), 10.14 min (<0.5%).



**HPLC data of 1-(2-methoxynaphthalen-1-yl)-2-methyl-benzo[*d*]imidazole (3c) prepared by the metallative methylation**

**【PDA chromatograms】**

*(rac)*-3c

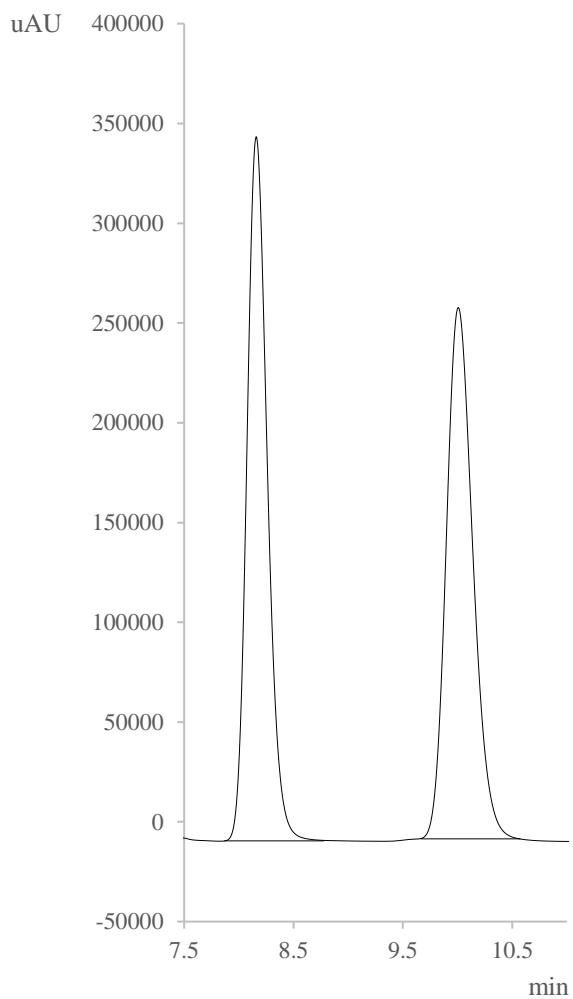

| Peak# | Ret. Time | Area    | Area% |
|-------|-----------|---------|-------|
| 1     | 8.16      | 4600260 | 50.02 |
| 2     | 10        | 4596214 | 49.98 |
| total |           | 9196474 | 100   |

*(S)*-3c

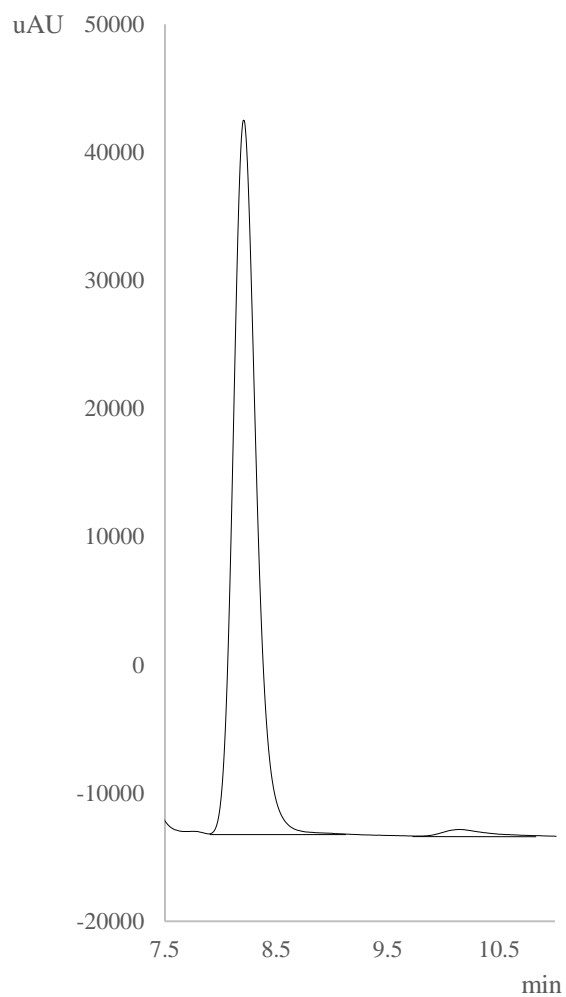

| Peak# | Ret. Time | Area   | Area% |
|-------|-----------|--------|-------|
| 1     | 8.2       | 800337 | 98.53 |
| 2     | 10.14     | 11978  | 1.47  |
| total |           | 812315 | 100   |

### 5. X-ray data of (*S*)-1-(2-methoxynaphthalen-1-yl)-2-bromo-benzo[*d*]imidazole, (*S*)-**3b**:

X-ray diffraction data of (*S*)-**3b** was collected on a Rigaku XtaLAB P100 diffractometer diffractometer employing graphite-monochromated Mo K $\alpha$  radiation and. The structures was solved by direct method with SIR-92 program<sup>[15]</sup> and refined with SHELXL program<sup>[16]</sup> The structural models were drawn with ORTEP-3 program<sup>[17]</sup> Further information on the crystal structure determinations have been deposited with the Cambridge Crystallographic Data Center [(*S*)-**3b**: CCDC 2296508]. Figure S1 shows the ORTEP drawing of (*S*)-**3b**.

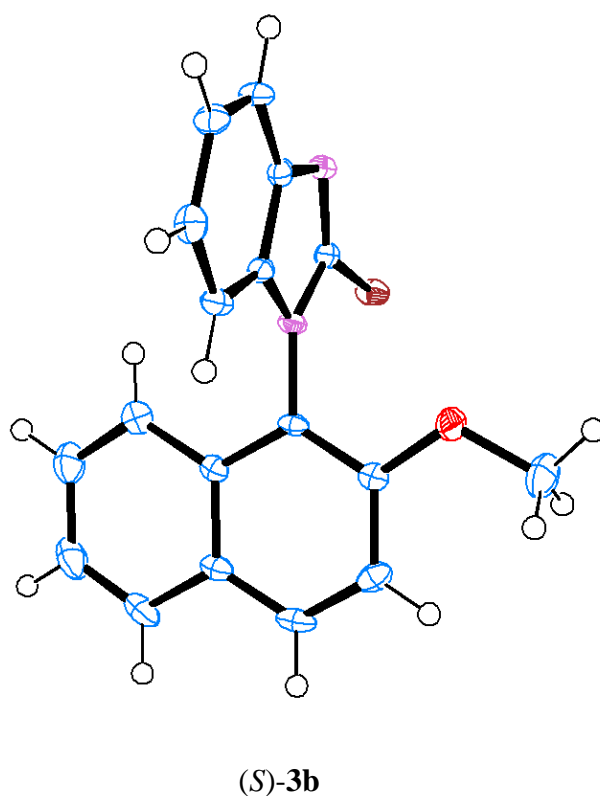

**Fig. S1** X-ray structure of compound (*S*)-**3b** (thermal ellipsoid plot at the 50% probability level)

**Table S3.** Crystallographic data and structural refinement for compound (*S*)-**3b**

|                                         |                                                    |
|-----------------------------------------|----------------------------------------------------|
| Compound                                | ( <i>S</i> )- <b>3b</b>                            |
| Empirical formula                       | C <sub>18</sub> H <sub>13</sub> BrN <sub>2</sub> O |
| Formula weight                          | 353.22                                             |
| Temperature (K)                         | 100                                                |
| Crystal system                          | <i>orthorhombic</i>                                |
| Space group                             | <i>P2<sub>1</sub>2<sub>1</sub>2<sub>1</sub></i>    |
| <i>a</i> (Å)                            | 7.0262 (11)                                        |
| <i>b</i> (Å)                            | 9.2338 (14)                                        |
| <i>c</i> (Å)                            | 24.100 (4)                                         |
| $\alpha$ (°)                            | 90                                                 |
| $\beta$ (°)                             | 90                                                 |
| $\gamma$ (°)                            | 90                                                 |
| Volume (Å <sup>3</sup> )                | 1563.5 (4)                                         |
| <i>Z</i>                                | 4                                                  |
| D <sub>calcd</sub> (g/cm <sup>3</sup> ) | 1.500                                              |
| <i>R</i> <sub>1</sub>                   | 0.0277                                             |
| w <i>R</i> <sub>2</sub>                 | 0.0543                                             |
| Goodness-of-fit                         | 0.922                                              |

## 6. Rotational barrier of (*S*)-**3w**

Equation 1.  $\Delta G = -RT \ln(kh/k_B T)$

Equation 2.  $t_{1/2} = \ln(2)/k$

Equation 3.  $k = k_{rac} / 2$

**Fig. S2** Formula of rotational barrier

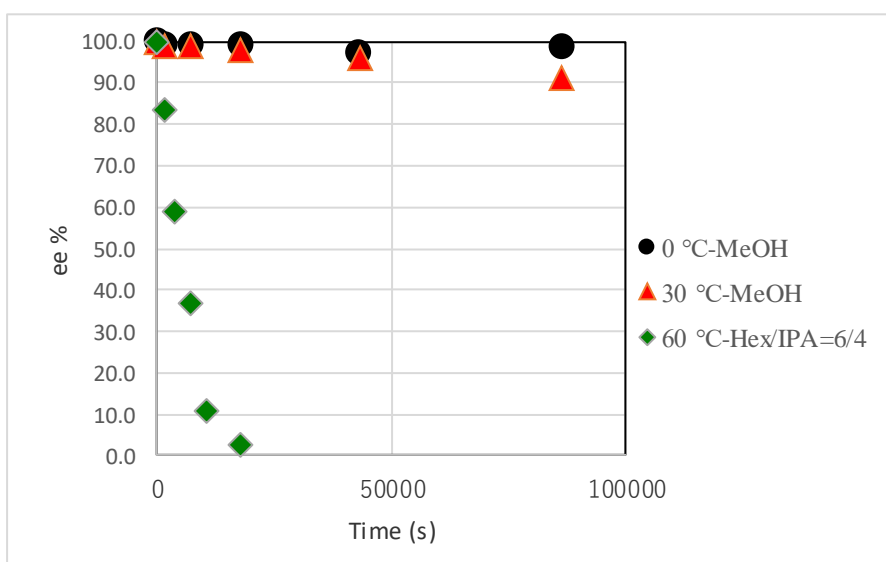

**Fig. S3** Decay of ee (%) in (*S*)-**3w**

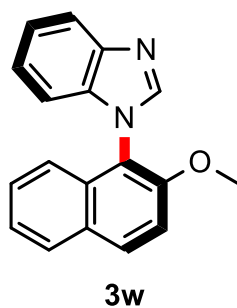

Rotational barrier: 27.6 kcal/mol

## 7. Experimental references:

- [1] E. Díez-Barra, A. de la Hoz, A. Moreno, P. Sánchez-Verdú, *J. Chem. Soc., Perkin Trans. 1*, 1991, 2589.
- [2] L. W. Bieber, M. C. F. de Araujo, *Molecules*, 2002, **7**, 902.
- [3] T. Sawada, M. Nakada, *Tetrahedron*, 2012, **23**, 350.
- [4] For the method of the preparation of bisoxazoline ligands; the alkylation of bisoxazoline ligands possessing no substituents at the bisoxazoline linkage, see: M. I. Burguete, J. M. Fraile, J. I. Garcia, E. Garcia-Verdugo, S. V. Luis, J. A. Mayoral, *Org. Lett.*, 2000, **2**, 3905–3908.
- [5] For the method of the preparation of bisoxazoline ligands; the cyclization of malonitrile with 2 equiv of amino alcohol, see: M. P. Sibi, L. Venkatraman, M. Liu, C. P. A. Jasperse, *J. Am. Chem. Soc.*, 2001, **123**, 8444.
- [6] For NMR spectra of **4e**, see: J. Choi, G. C. Fu, *J. Am. Chem. Soc.*, 2012, **134**, 9102.
- [7] For the NMR spectra of **4f**, see: M. Li, A. Hawkins, D. M. Barber, P. Bultinck, W. Herrebout, D. J. Dixon, *Chem. Commun.*, 2013, **49**, 5265.
- [8] For the NMR spectra of **4g**, see: Y. Miura, T. Mochida, S. Motodate, K. Kato, *Polyhedron*, 2016, **113**, 1.
- [9] For the NMR spectra of **4h**, see: Q. J. Liu, W. G. Yan, L. Wang, X. P. Zhang, Y. Tang, *Org. Lett.*, 2015, **17**, 4014.
- [10] For the NMR spectra of **4i**, see: S. K. Ginotraa, V. K. Singh, *Org. Biomol. Chem.*, 2007, **5**, 3932.
- [11] For the synthesis of 2-methoxy-1-naphthyl boronic acid, see: T. B. Hamby, M. J. LaLama, C. S. Sevov, *Science*, 2022, **376**, 410.
- [12] S. Manabe, Y. Nakahara, Y. Ito, *Synlett*, 1997, **11**, 1241.
- [13] J. Zheng, S. B. Wang, C. Zheng, S. L. You, *J. Am. Chem. Soc.*, 2015, **137**, 4880.
- [14] C. He, M. How, Z. Zhu, Z. Gu, *ACS Catal.*, 2017, **7**, 5316.
- [15] NMR spectra of **4j**; S. Nicolai, J. Waser, *Angew. Chem. Int. Ed.*, 2022, **61**, e202209006.
- [15] A. Altomare, G. Cascarano, C. Giacovazzo, A. Guagliardi, *J. Appl. Cryst.*, 1993, **26**, 343.
- [16] G. M. Sheldrick, *Acta Cryst.*, 2008, **A64**, 112.
- [17] L. J. Farrugia, *J. Appl. Cryst.*, 1997, **30**, 565.
