# Supplementary material for: First atroposelective Chan–Lam coupling for the synthesis of C–N linked biaryls
Source: Royal Society of Chemistry journal article supplement (doi:10.1039/d3cc05447k), 2023-12-19
Supplement: d3cc05447k2.pdf [file d3cc05447k2.pdf]

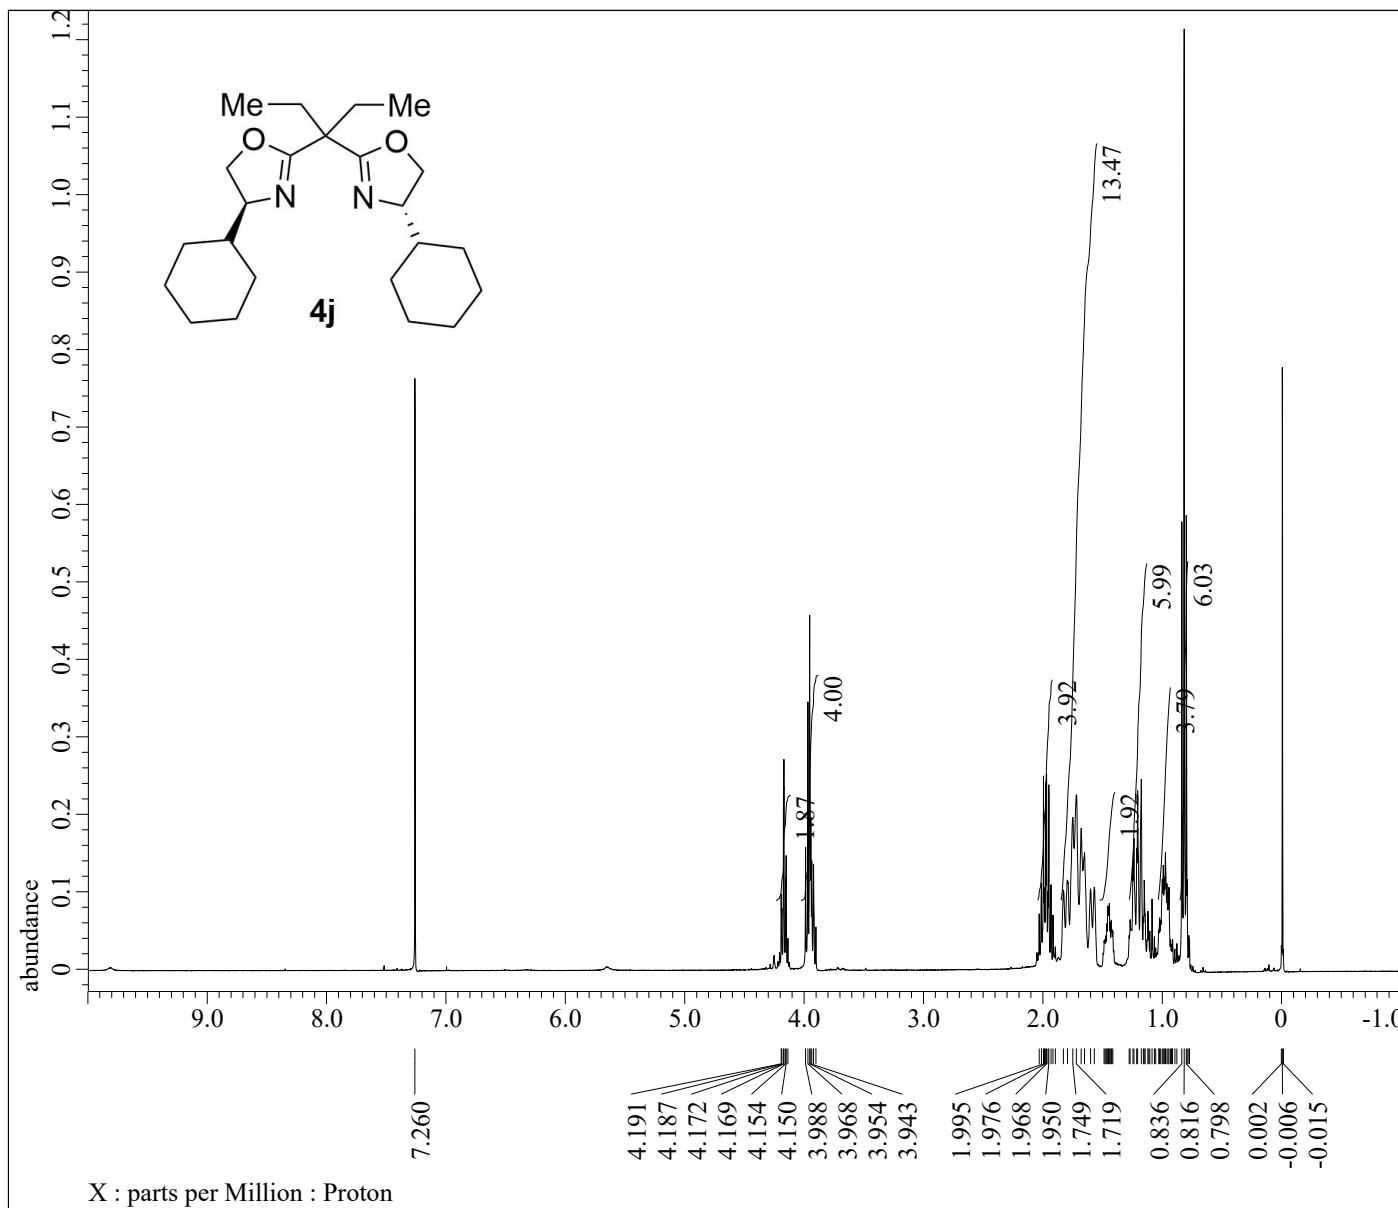

|                   |                         |
|-------------------|-------------------------|
| Filename          | = MI-5-Ligand-cyclohex  |
| Author            | = delta                 |
| Experiment        | = proton_auto.jxp       |
| Sample Id         | = MI-5-Ligand-cyclohex  |
| Solvent           | = CHLOROFORM-D          |
| Actual_Start_Time | = 12-JUN-2023 19:11:... |
| Revision_Time     | = 18-OCT-2023 23:23:... |
| Comment           | = MI-5-Ligand-cyclohex  |
| Data_Format       | = 1D COMPLEX            |
| Dim_Size          | = 13107                 |
| Dim_Title         | = Proton                |
| Dim_Units         | = [ppm]                 |
| Dimensions        | = X                     |
| Spectrometer      | = JNM-ECZ400S/L1        |
| Field_Strength    | = 9.389766[T] (400[M    |
| X_Acq_Duration    | = 2.18628096[s]         |
| X_Domain          | = Proton                |
| X_Freq            | = 399.78219838[MHz]     |
| X_Offset          | = 5[ppm]                |
| X_Points          | = 16384                 |
| X_Prescans        | = 1                     |
| X_Resolution      | = 0.45739775[Hz]        |
| X_Sweep           | = 7.4940048[kHz]        |
| X_Sweep_Clipped   | = 5.99520384[kHz]       |
| Irr_Domain        | = Proton                |
| Irr_Freq          | = 399.78219838[MHz]     |
| Irr_Offset        | = 5[ppm]                |
| Tri_Domain        | = Proton                |
| Tri_Freq          | = 399.78219838[MHz]     |
| Tri_Offset        | = 5[ppm]                |
| Blanking          | = 2[us]                 |
| Clipped           | = FALSE                 |
| Scans             | = 8                     |
| Total_Scans       | = 8                     |
| Relaxation_Delay  | = 5[s]                  |
| Recvr_Gain        | = 56                    |
| Temp_Get          | = 18.5[dC]              |
| X_90_Width        | = 8[us]                 |
| X_Acq_Time        | = 2.18628096[s]         |
| X_Angle           | = 45[deg]               |
| X_Atn             | = 6[dB]                 |
| X_Pulse           | = 4[us]                 |
| Irr_Mode          | = Off                   |
| Tri_Mode          | = Off                   |
| Dante_Loop        | = 500                   |
| Dante_Presat      | = FALSE                 |
| Decimation_Rate   | = 0                     |
| Experiment_Path   | = c:\Program Files\J... |
| Initial_Wait      | = 1[s]                  |
| Phase             | = {0, 90, 270, 180,     |

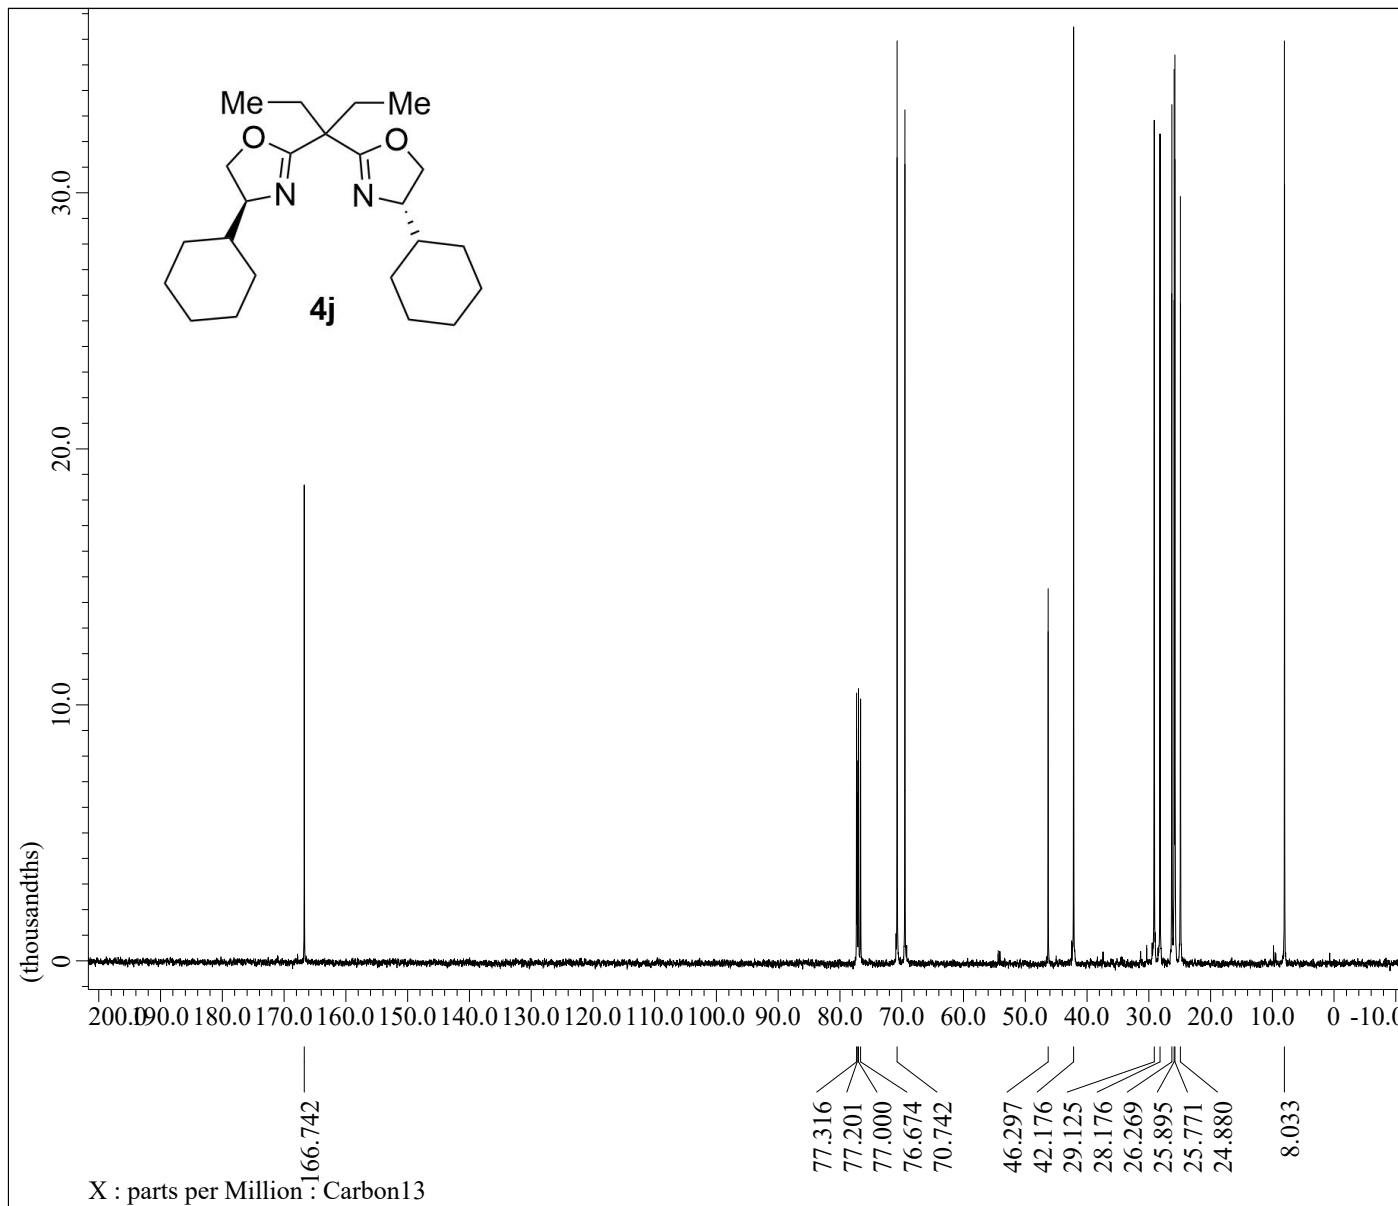

```

Filename      = MI-chira-Bxliga
Author       = delta
Experiment   = carbon_auto.jpg
Sample Id    = MI-chira-Bxliga
Solvent      = CHLOROFORM-D
Actual_Start_Time = 29-SEP-2023 11:
Revision_Time  = 14-OCT-2023 01:

Comment      = MI-chira-Bxliga
Data_Format  = 1D COMPLEX
Dim_Size     = 26214
Dim_Title    = Carbon13
Dim_Units    = [ppm]
Dimensions   = X
Spectrometer = JNM-ECZ400S/L1

Field_Strength = 9.389766[T] (40
X_Acq_Duration = 1.03809024[s]
X_Domain       = Carbon13
X_Freq         = 100.52530333[MH
X_Offset       = 100[ppm]
X_Points       = 32768
X_Prescans     = 4
X_Resolution   = 0.96330739[Hz]
X_Sweep        = 31.56565657[kHz]
X_Sweep_Clipped = 25.25252525[kHz]
Irr_Domain     = Proton
Irr_Freq       = 399.78219838[MH
Irr_Offset     = 5[ppm]
Blanking       = 5[us]
Clipped        = TRUE
Incomplete_Copy = TRUE
Scans          = 119
Total_Scans    = 119

Relaxation_Delay = 2[s]
Recvr_Gain       = 50
Temp_Get         = 19.9[dC]
X_90_Width      = 11.8[us]
X_Acq_Time      = 1.03809024[s]
X_Angle         = 30[deg]
X_Atn           = 8[dB]
X_Pulse         = 3.93333333[us]
Irr_Atn_Dec     = 29.152[dB]
Irr_Atn_Dec_Calc = 29.152[dB]
Irr_Atn_Dec_Default_Calc = 29.152[dB]
Irr_Atn_No     = 29.152[dB]
Irr_Dec_Bandwidth_Hz = 4.7826087[kHz]
Irr_Dec_Bandwidth_Ppm = 11.96303566[ppm]
Irr_Dec_Freq    = 399.78219838[MH
Irr_Dec_Merit_Factor = 2.2
Irr_Decoupling = TRUE
Irr_No     = TRUE

```

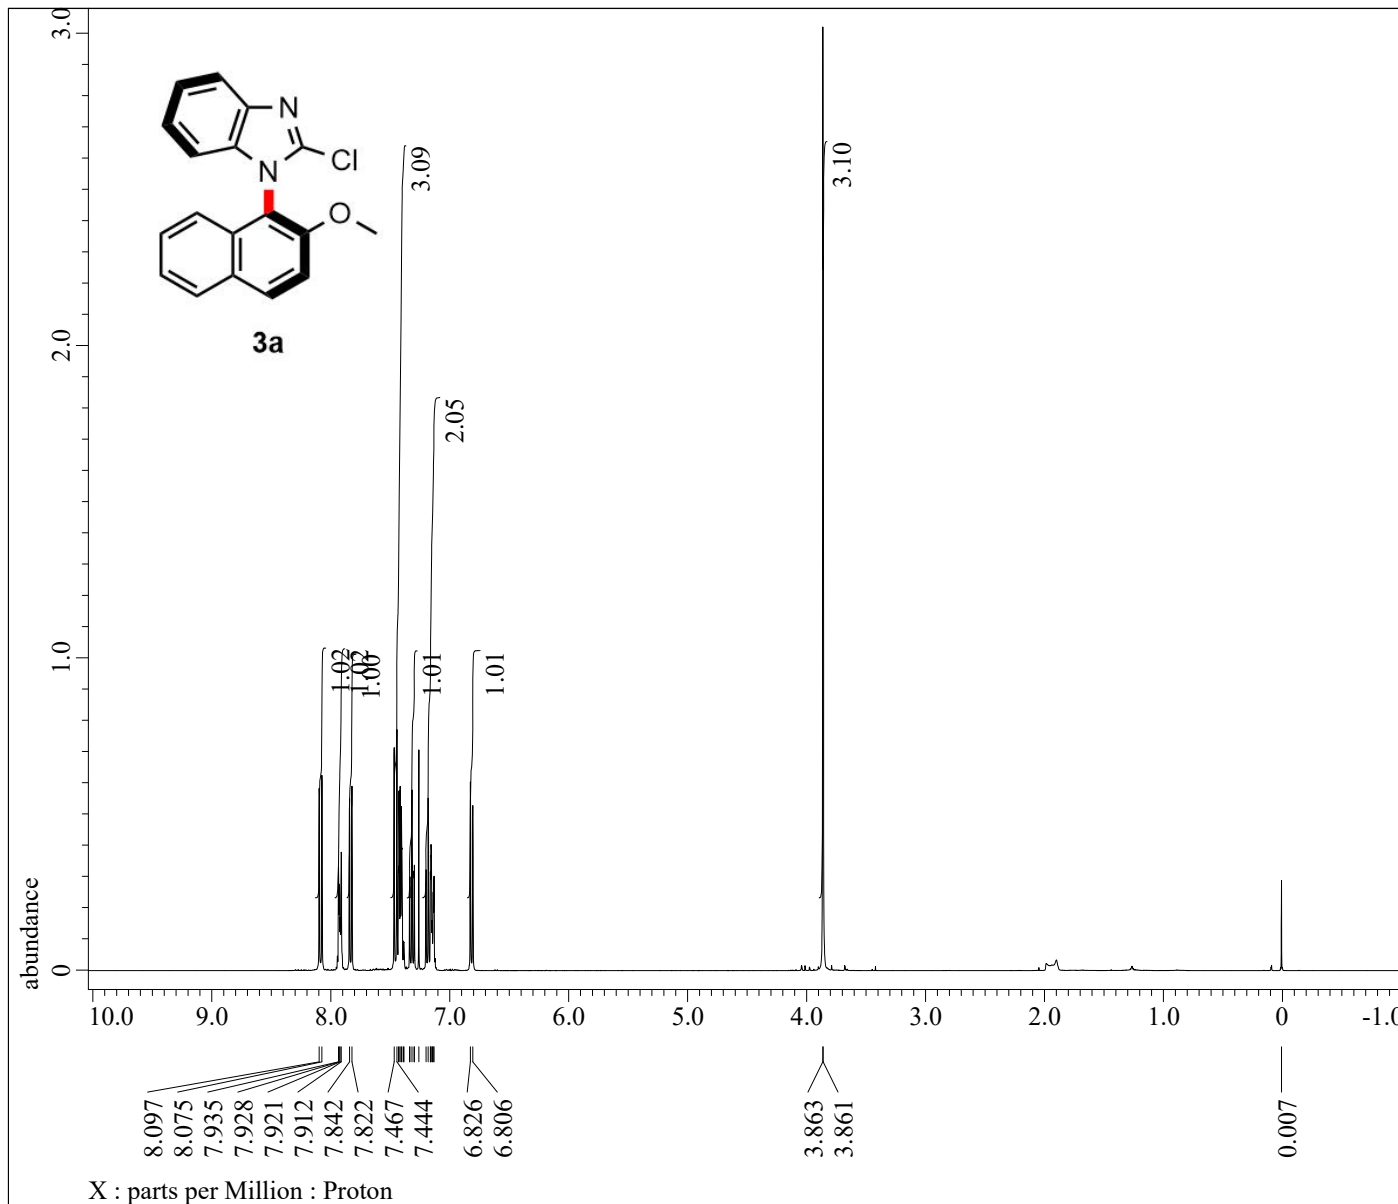

|                   |                      |
|-------------------|----------------------|
| Filename          | = MI-5-63-chiral-Ber |
| Author            | = delta              |
| Experiment        | = proton_auto.jxp    |
| Sample_Id         | = MI-5-63-chiral-Ber |
| Solvent           | = CHLOROFORM-D       |
| Actual_Start_Time | = 22-SEP-2023 00:14: |
| Revision_Time     | = 18-OCT-2023 23:06: |
| Comment           | = MI-5-63-chiral-Ber |
| Data_Format       | = 1D COMPLEX         |
| Dim_Size          | = 13107              |
| Dim_Title         | = Proton             |
| Dim_Units         | = [ppm]              |
| Dimensions        | = X                  |
| Spectrometer      | = JNM-ECZ400S/L1     |
| Field_Strength    | = 9.389766[T] (400[M |
| X_Acq_Duration    | = 2.18628096[s]      |
| X_Domain          | = Proton             |
| X_Freq            | = 399.78219838[MHz]  |
| X_Offset          | = 5[ppm]             |
| X_Points          | = 16384              |
| X_Prescans        | = 1                  |
| X_Resolution      | = 0.45739775[Hz]     |
| X_Sweep           | = 7.4940048[kHz]     |
| X_Sweep_Clipped   | = 5.99520384[kHz]    |
| Irr_Domain        | = Proton             |
| Irr_Freq          | = 399.78219838[MHz]  |
| Irr_Offset        | = 5[ppm]             |
| Tri_Domain        | = Proton             |
| Tri_Freq          | = 399.78219838[MHz]  |
| Tri_Offset        | = 5[ppm]             |
| Blanking          | = 2[us]              |
| Clipped           | = FALSE              |
| Scans             | = 8                  |
| Total_Scans       | = 8                  |
| Relaxation_Delay  | = 5[s]               |
| Recvr_Gain        | = 46                 |
| Temp_Get          | = 18.3[dC]           |
| X_90_Width        | = 8[us]              |
| X_Acq_Time        | = 2.18628096[s]      |
| X_Angle           | = 45[deg]            |
| X_Atn             | = 6[dB]              |
| X_Pulse           | = 4[us]              |
| Irr_Mode          | = Off                |
| Tri_Mode          | = Off                |
| Dante_Loop        | = 500                |
| Dante_Presat      | = FALSE              |
| Decimation_Rate   | = 0                  |
| Experiment_Path   | = c:\Program Files\J |
| Initial_Wait      | = 1[s]               |
| Phase             | = {0, 90, 270, 180,  |

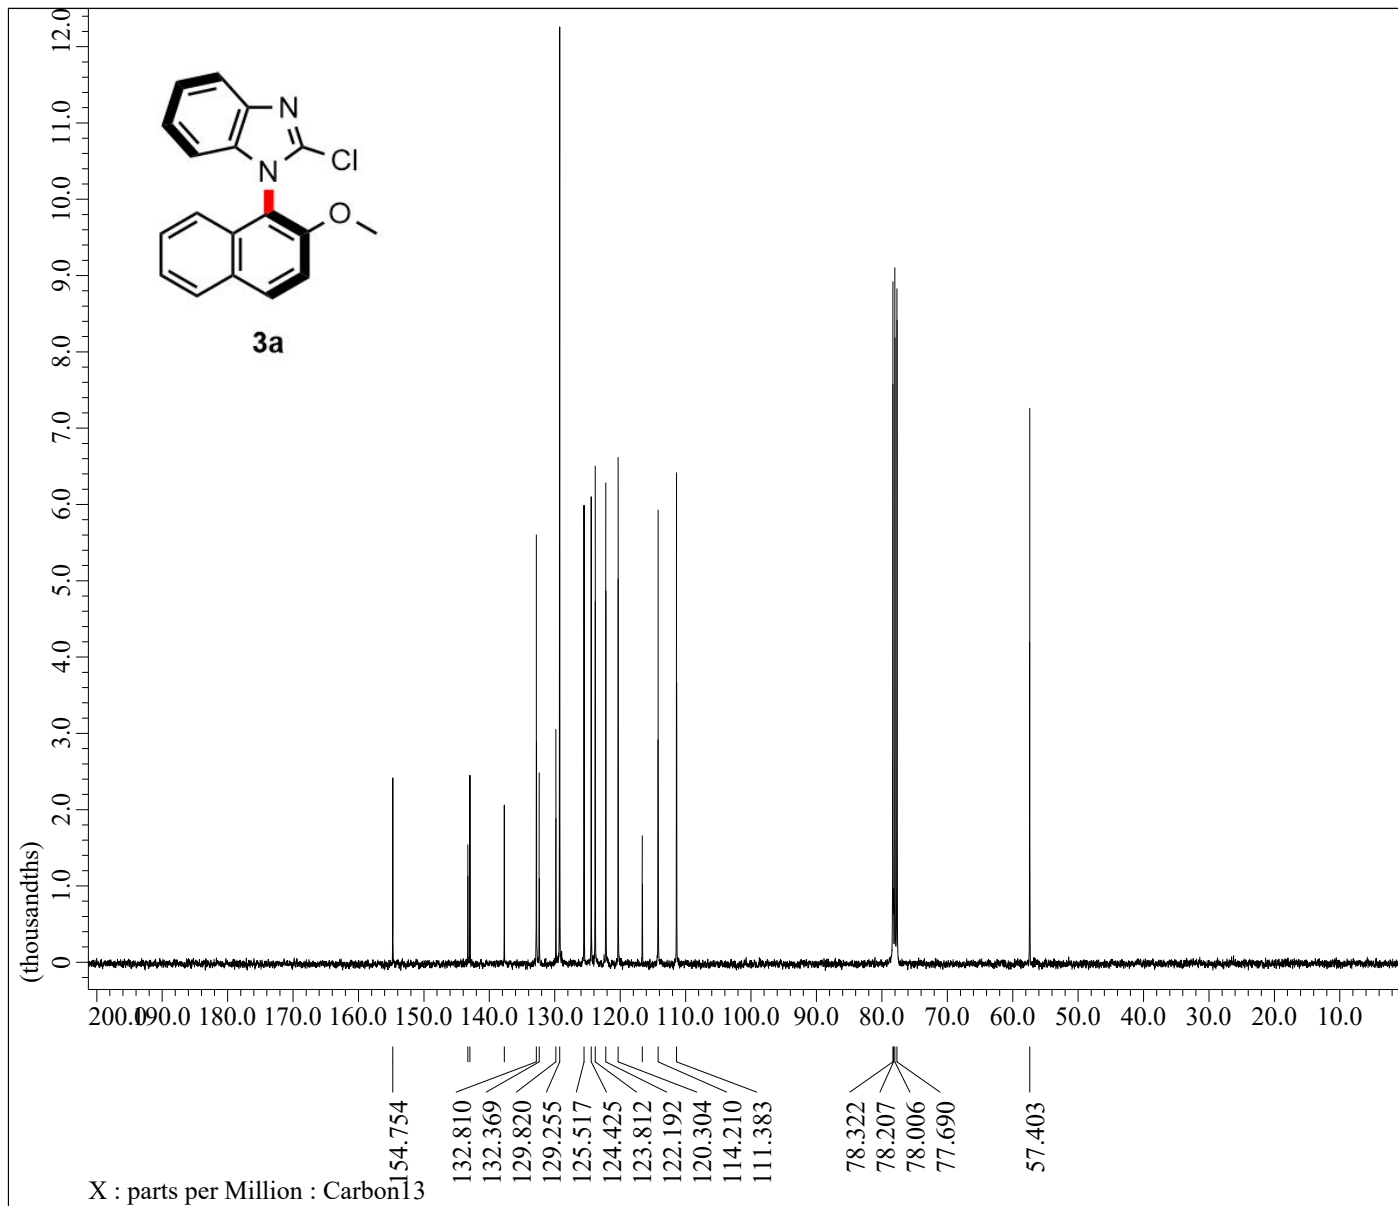

```

Filename           = MI-5-63-chiral-
Author             = delta
Experiment         = carbon_auto.jpg
Sample_Id          = MI-5-63-chiral-
Solvent            = CHLOROFORM-D
Actual_Start_Time  = 22-SEP-2023 03:
Revision_Time      = 14-OCT-2023 02:

Comment           = MI-5-63-chiral-
Data_Format       = 1D COMPLEX
Dim_Size          = 26214
Dim_Title         = Carbon13
Dim_Units         = [ppm]
Dimensions        = X
Spectrometer      = JNM-ECZ400S/L1

Field_Strength    = 9.389766[T] (40
X_Acq_Duration    = 1.03809024[s]
X_Domain          = Carbon13
X_Freq            = 100.52530333[MH
X_Offset          = 100[ppm]
X_Points          = 32768
X_Prescans        = 4
X_Resolution      = 0.96330739[Hz]
X_Sweep           = 31.56565657[kHz]
X_Sweep_Clipped  = 25.25252525[kHz]
Irr_Domain        = Proton
Irr_Freq          = 399.78219838[MH
Irr_Offset        = 5[ppm]
Blanking          = 5[us]
Clipped           = TRUE
Scans             = 1024
Total_Scans       = 1024

Relaxation_Delay  = 2[s]
Recvr_Gain        = 50
Temp_Get          = 18[dC]
X_90_Width        = 11.8[us]
X_Acq_Time        = 1.03809024[s]
X_Angle           = 30[deg]
X_Atn             = 8[dB]
X_Pulse           = 3.93333333[us]
Irr_Atn_Dec       = 29.152[dB]
Irr_Atn_Dec_Calc = 29.152[dB]
Irr_Atn_Dec_Default_Calc = 29.152[dB]
Irr_Atn_Noise    = 29.152[dB]
Irr_Dec_Bandwidth_Hz = 4.7826087[kHz]
Irr_Dec_Bandwidth_Ppm = 11.96303566[ppm]
Irr_Dec_Freq     = 399.78219838[MH
Irr_Dec_Merit_Factor = 2.2
Irr_Decoupling   = TRUE
Irr_Noise        = TRUE
Irr_Noise        = WALTZ
  
```

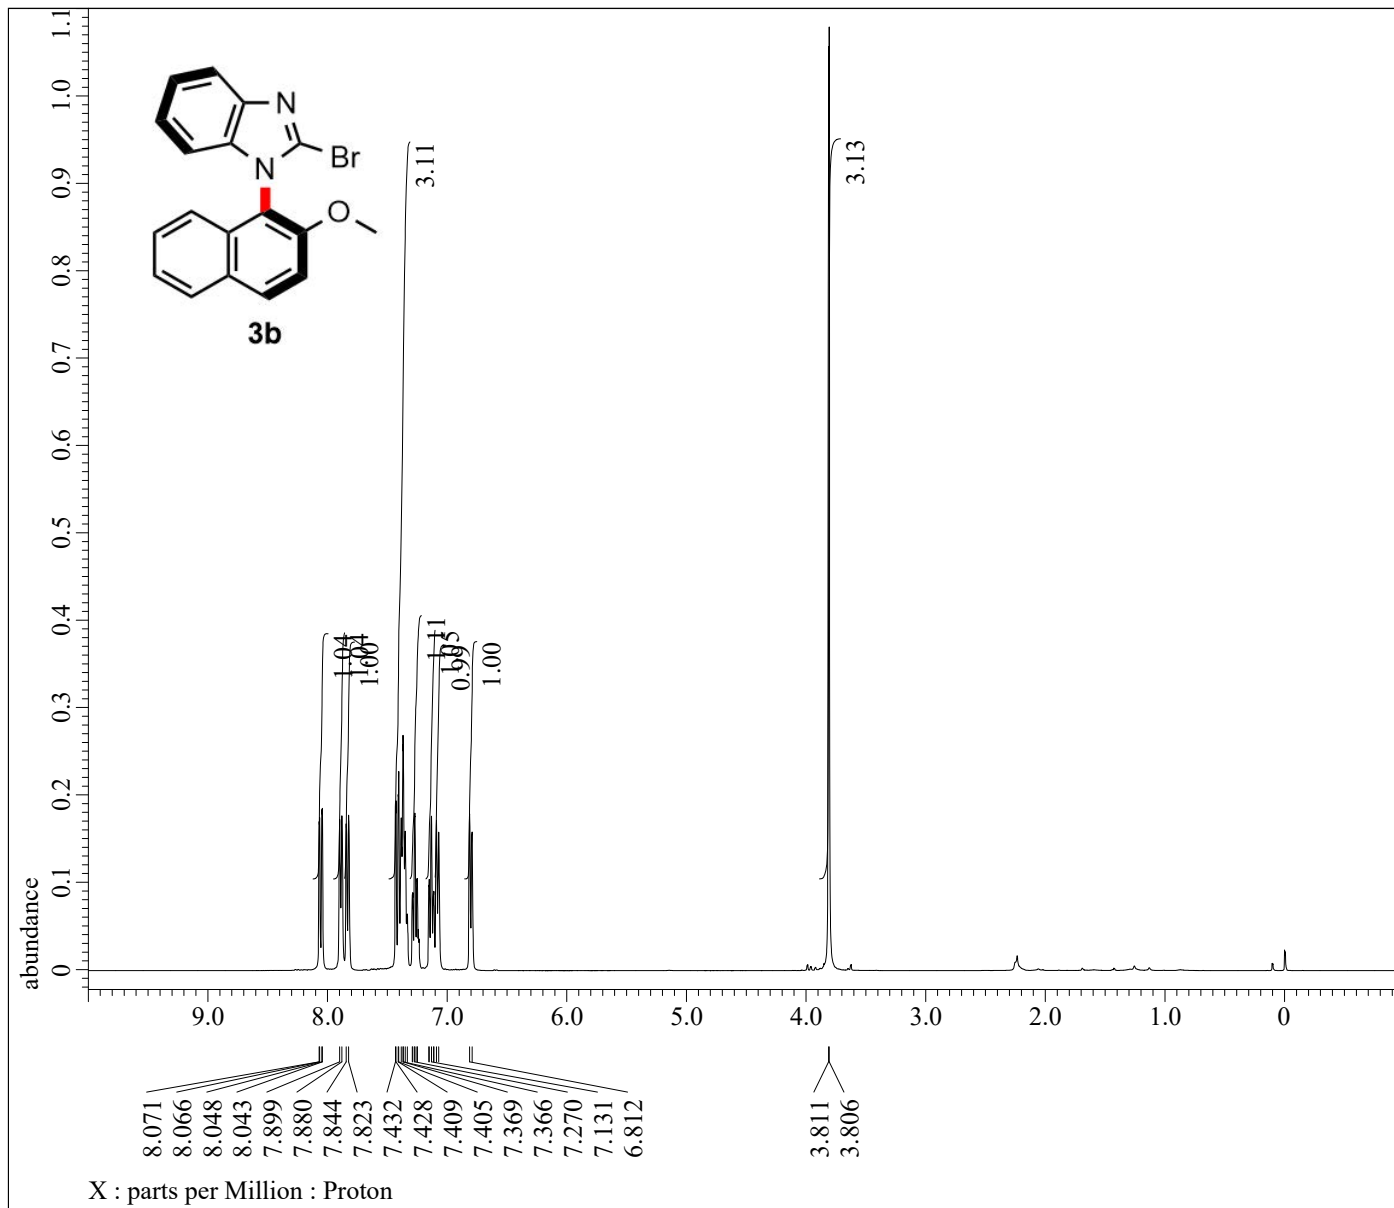

|                   |                      |
|-------------------|----------------------|
| Filename          | = MI-chiral-BenzImi- |
| Author            | = delta              |
| Experiment        | = proton_auto.jpg    |
| Sample Id         | = MI-chiral-BenzImi- |
| Solvent           | = CHLOROFORM-D       |
| Actual_Start_Time | = 22-SEP-2023 00:03: |
| Revision_Time     | = 13-OCT-2023 01:46: |
| Comment           | = MI-chiral-BenzImi- |
| Data_Format       | = 1D COMPLEX         |
| Dim_Size          | = 13107              |
| Dim_Title         | = Proton             |
| Dim_Units         | = [ppm]              |
| Dimensions        | = X                  |
| Spectrometer      | = JNM-ECZ400S/L1     |
| Field_Strength    | = 9.389766[T] (400[M |
| X_Acq_Duration    | = 2.18628096[s]      |
| X_Domain          | = Proton             |
| X_Freq            | = 399.78219838[MHz]  |
| X_Offset          | = 5[ppm]             |
| X_Points          | = 16384              |
| X_Prescans        | = 1                  |
| X_Resolution      | = 0.45739775[Hz]     |
| X_Sweep           | = 7.4940048[kHz]     |
| X_Sweep_Clipped   | = 5.99520384[kHz]    |
| Irr_Domain        | = Proton             |
| Irr_Freq          | = 399.78219838[MHz]  |
| Irr_Offset        | = 5[ppm]             |
| Tri_Domain        | = Proton             |
| Tri_Freq          | = 399.78219838[MHz]  |
| Tri_Offset        | = 5[ppm]             |
| Blanking          | = 2[us]              |
| Clipped           | = FALSE              |
| Scans             | = 8                  |
| Total_Scans       | = 8                  |
| Relaxation_Delay  | = 5[s]               |
| Recvr_Gain        | = 36                 |
| Temp_Get          | = 18.3[dC]           |
| X_90_Width        | = 8[us]              |
| X_Acq_Time        | = 2.18628096[s]      |
| X_Angle           | = 45[deg]            |
| X_Atn             | = 6[dB]              |
| X_Pulse           | = 4[us]              |
| Irr_Mode          | = Off                |
| Tri_Mode          | = Off                |
| Dante_Loop        | = 500                |
| Dante_Presat      | = FALSE              |
| Decimation_Rate   | = 0                  |
| Experiment_Path   | = c:\Program Files\J |
| Initial_Wait      | = 1[s]               |
| Phase             | = {0, 90, 270, 180,  |

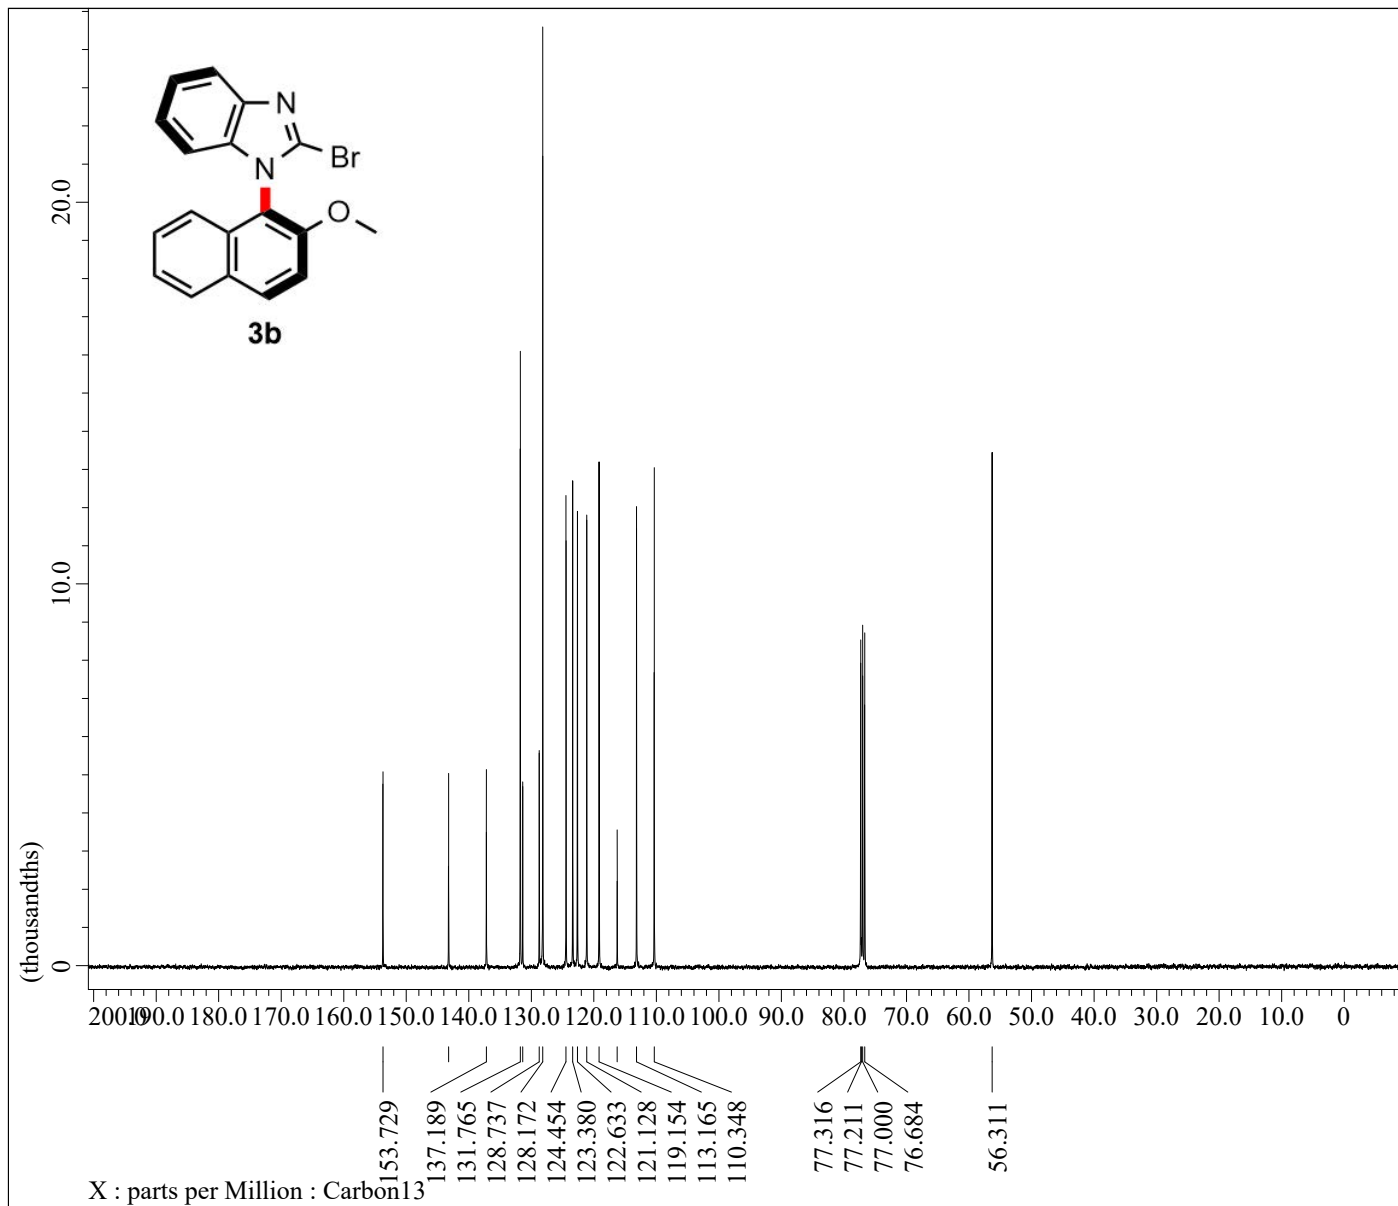

|                          |                    |
|--------------------------|--------------------|
| Filename                 | = MI-chiral-BenzI  |
| Author                   | = delta            |
| Experiment               | = carbon_auto.jpg  |
| Sample Id                | = MI-chiral-BenzI  |
| Solvent                  | = CHLOROFORM-D     |
| Actual_Start_Time        | = 22-SEP-2023 02:  |
| Revision_Time            | = 14-OCT-2023 02:  |
| Comment                  | = MI-chiral-BenzI  |
| Data_Format              | = 1D COMPLEX       |
| Dim_Size                 | = 26214            |
| Dim_Title                | = Carbon13         |
| Dim_Units                | = [ppm]            |
| Dimensions               | = X                |
| Spectrometer             | = JNM-ECZ400S/L1   |
| Field_Strength           | = 9.389766[T] (40  |
| X_Acq_Duration           | = 1.03809024[s]    |
| X_Domain                 | = Carbon13         |
| X_Freq                   | = 100.52530333[MH  |
| X_Offset                 | = 100[ppm]         |
| X_Points                 | = 32768            |
| X_Prescans               | = 4                |
| X_Resolution             | = 0.96330739[Hz]   |
| X_Sweep                  | = 31.56565657[kHz  |
| X_Sweep_Clipped          | = 25.25252525[kHz  |
| Irr_Domain               | = Proton           |
| Irr_Freq                 | = 399.78219838[MH  |
| Irr_Offset               | = 5[ppm]           |
| Blanking                 | = 5[us]            |
| Clipped                  | = TRUE             |
| Scans                    | = 1024             |
| Total_Scans              | = 1024             |
| Relaxation_Delay         | = 2[s]             |
| Recvr_Gain               | = 50               |
| Temp_Get                 | = 18.2[dC]         |
| X_90_Width               | = 11.8[us]         |
| X_Acq_Time               | = 1.03809024[s]    |
| X_Angle                  | = 30[deg]          |
| X_Atn                    | = 8[dB]            |
| X_Pulse                  | = 3.93333333[us]   |
| Irr_Atn_Dec              | = 29.152[dB]       |
| Irr_Atn_Dec_Calc         | = 29.152[dB]       |
| Irr_Atn_Dec_Default_Calc | = 29.152[dB]       |
| Irr_Atn_No               | = 29.152[dB]       |
| Irr_Dec_Bandwidth_Hz     | = 4.7826087[kHz]   |
| Irr_Dec_Bandwidth_Ppm    | = 11.96303566[ppm] |
| Irr_Dec_Freq             | = 399.78219838[MH  |
| Irr_Dec_Merit_Factor     | = 2.2              |
| Irr_Decoupling           | = TRUE             |
| Irr_No                   | = TRUE             |
| Irr_Noise                | = WALTZ            |

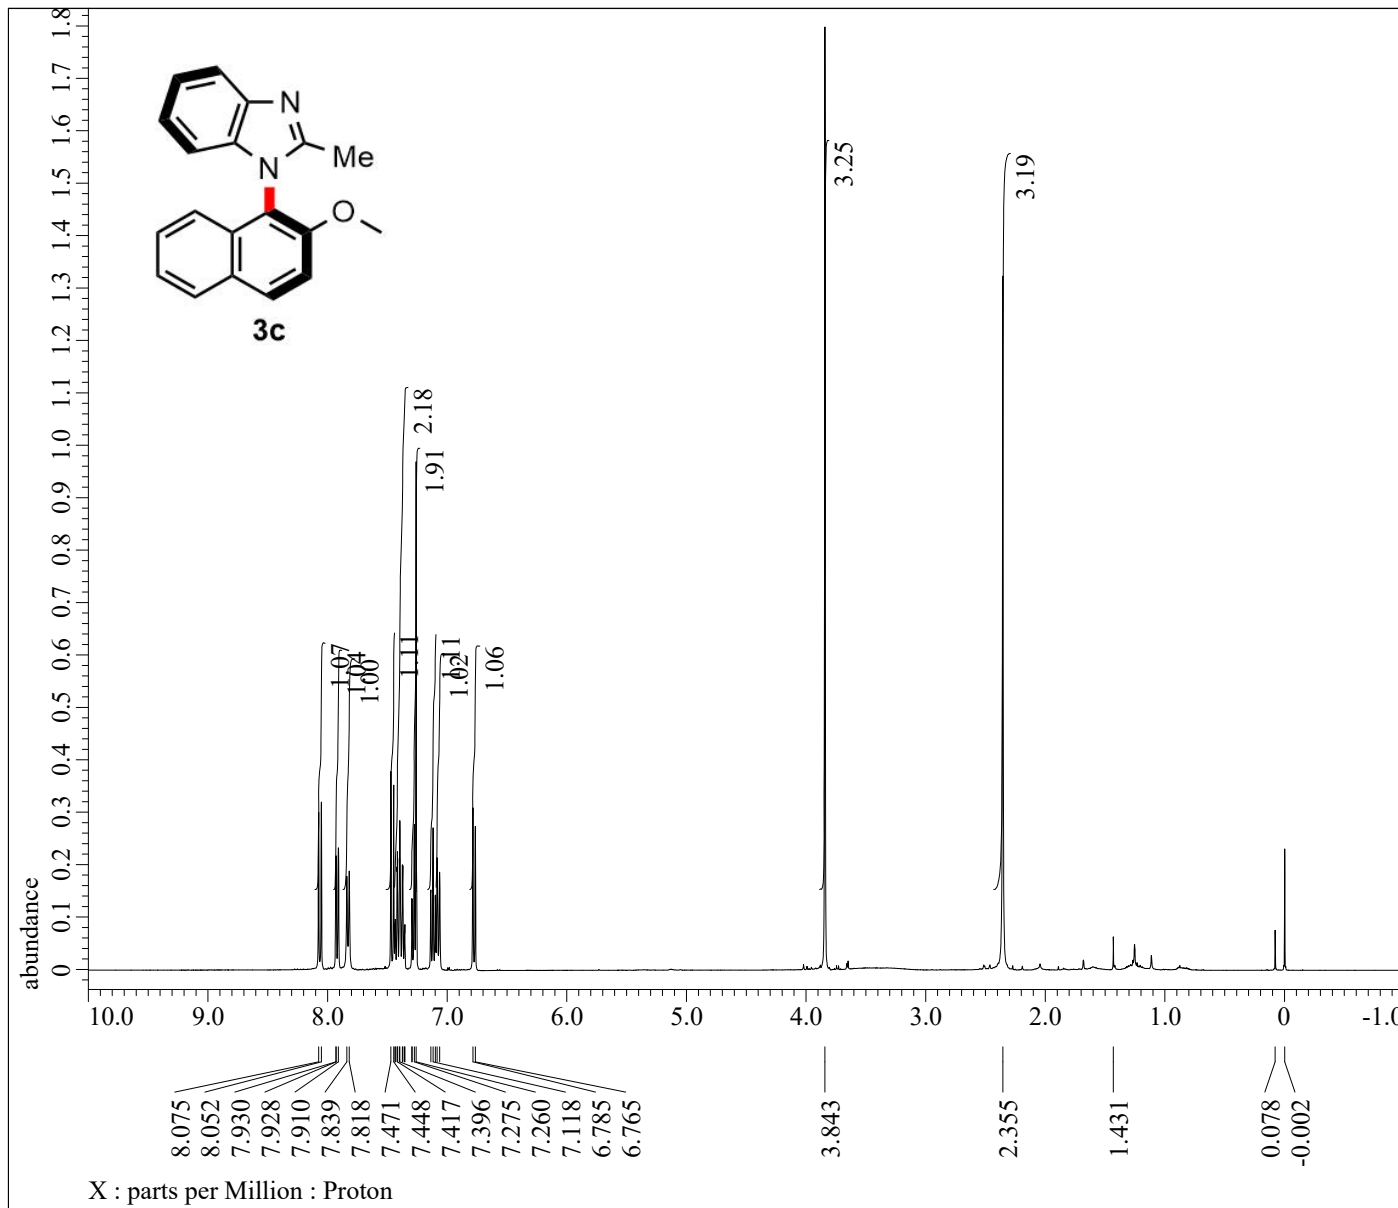

|                   |                      |
|-------------------|----------------------|
| Filename          | = MI-5-62-BenzImi-Me |
| Author            | = delta              |
| Experiment        | = proton_auto.jpg    |
| Sample Id         | = MI-5-62-BenzImi-Me |
| Solvent           | = CHLOROFORM-D       |
| Actual_Start_Time | = 22-SEP-2023 19:58: |
| Revision_Time     | = 13-OCT-2023 02:01: |
| Comment           | = MI-5-62-BenzImi-Me |
| Data_Format       | = 1D COMPLEX         |
| Dim_Size          | = 13107              |
| Dim_Title         | = Proton             |
| Dim_Units         | = [ppm]              |
| Dimensions        | = X                  |
| Spectrometer      | = JNM-ECZ400S/L1     |
| Field_Strength    | = 9.389766[T] (400[M |
| X_Acq_Duration    | = 2.18628096[s]      |
| X_Domain          | = Proton             |
| X_Freq            | = 399.78219838[MHz]  |
| X_Offset          | = 5[ppm]             |
| X_Points          | = 16384              |
| X_Prescans        | = 1                  |
| X_Resolution      | = 0.45739775[Hz]     |
| X_Sweep           | = 7.4940048[kHz]     |
| X_Sweep_Clipped   | = 5.99520384[kHz]    |
| Irr_Domain        | = Proton             |
| Irr_Freq          | = 399.78219838[MHz]  |
| Irr_Offset        | = 5[ppm]             |
| Tri_Domain        | = Proton             |
| Tri_Freq          | = 399.78219838[MHz]  |
| Tri_Offset        | = 5[ppm]             |
| Blanking          | = 2[us]              |
| Clipped           | = FALSE              |
| Scans             | = 8                  |
| Total_Scans       | = 8                  |
| Relaxation_Delay  | = 5[s]               |
| Recvr_Gain        | = 46                 |
| Temp_Get          | = 18.3[dC]           |
| X_90_Width        | = 8[us]              |
| X_Acq_Time        | = 2.18628096[s]      |
| X_Angle           | = 45[deg]            |
| X_Atn             | = 6[dB]              |
| X_Pulse           | = 4[us]              |
| Irr_Mode          | = Off                |
| Tri_Mode          | = Off                |
| Dante_Loop        | = 500                |
| Dante_Presat      | = FALSE              |
| Decimation_Rate   | = 0                  |
| Experiment_Path   | = c:\Program Files\J |
| Initial_Wait      | = 1[s]               |
| Phase             | = {0, 90, 270, 180,  |

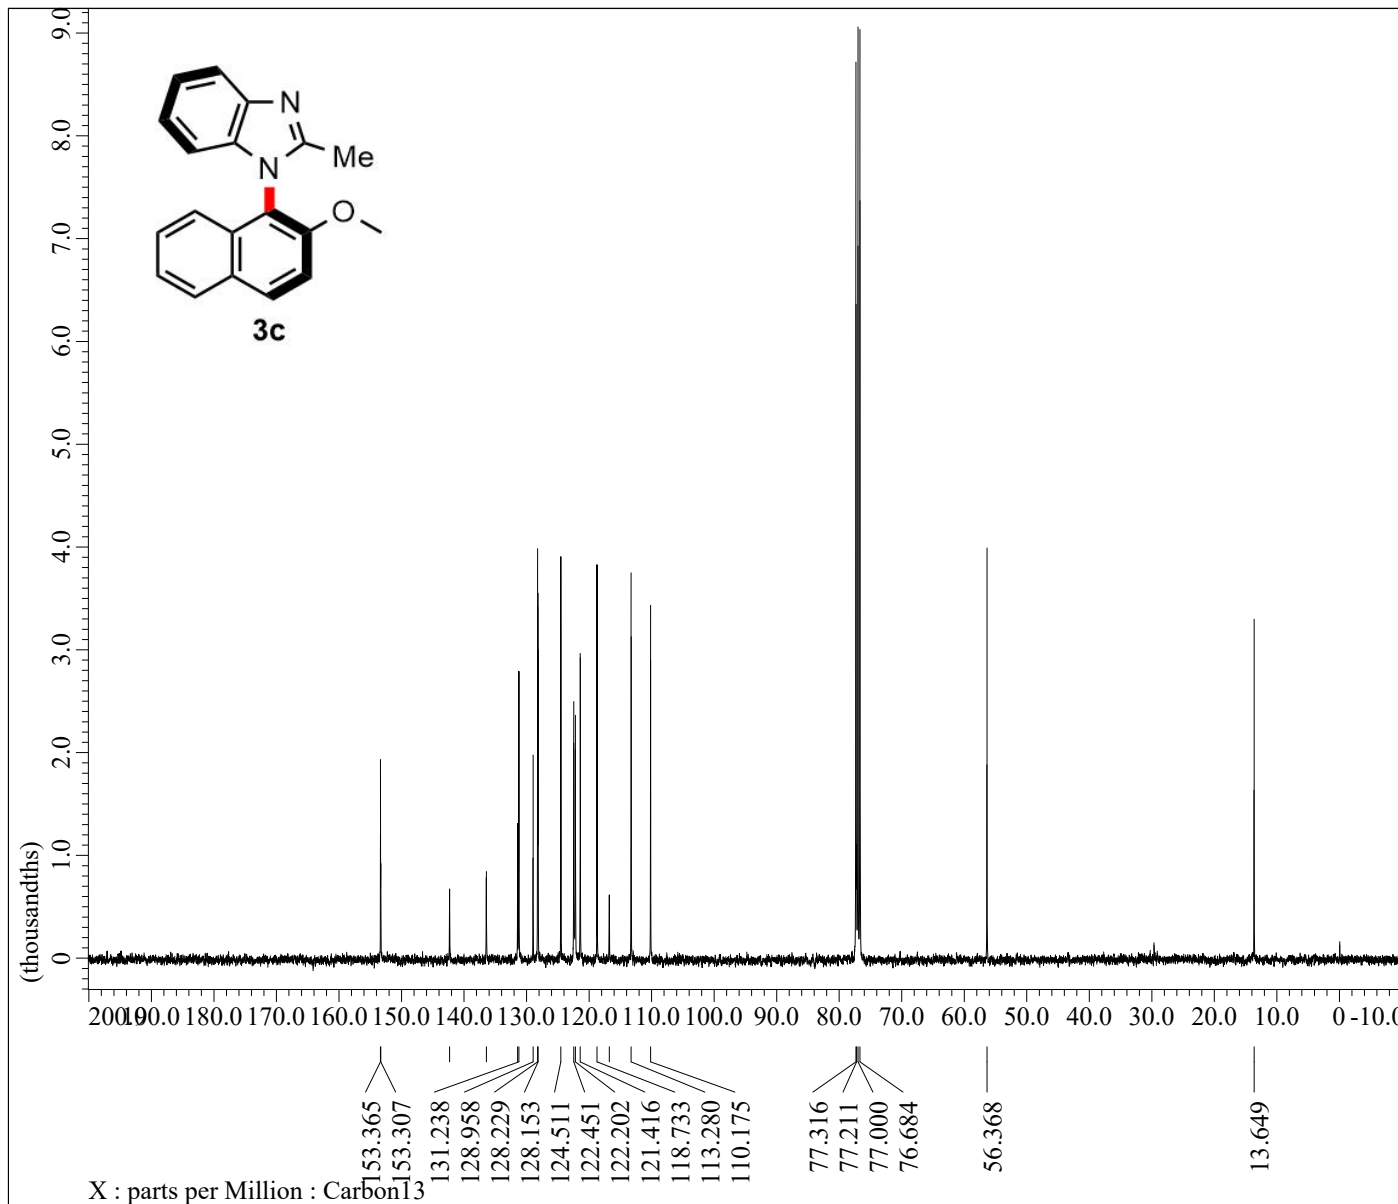

|                          |                    |
|--------------------------|--------------------|
| Filename                 | = MI-5-62-BenzImi  |
| Author                   | = delta            |
| Experiment               | = carbon_auto.jpg  |
| Sample Id                | = MI-5-62-BenzImi  |
| Solvent                  | = CHLOROFORM-D     |
| Actual_Start_Time        | = 25-SEP-2023 19:  |
| Revision_Time            | = 14-OCT-2023 02:  |
| Comment                  | = MI-5-62-BenzImi  |
| Data_Format              | = 1D COMPLEX       |
| Dim_Size                 | = 26214            |
| Dim_Title                | = Carbon13         |
| Dim_Units                | = [ppm]            |
| Dimensions               | = X                |
| Spectrometer             | = JNM-ECZ400S/L1   |
| Field_Strength           | = 9.389766[T] (40  |
| X_Acq_Duration           | = 1.03809024[s]    |
| X_Domain                 | = Carbon13         |
| X_Freq                   | = 100.52530333[MH  |
| X_Offset                 | = 100[ppm]         |
| X_Points                 | = 32768            |
| X_Prescans               | = 4                |
| X_Resolution             | = 0.96330739[Hz]   |
| X_Sweep                  | = 31.56565657[kHz  |
| X_Sweep_Clipped          | = 25.25252525[kHz  |
| Irr_Domain               | = Proton           |
| Irr_Freq                 | = 399.78219838[MH  |
| Irr_Offset               | = 5[ppm]           |
| Blanking                 | = 5[us]            |
| Clipped                  | = TRUE             |
| Scans                    | = 1024             |
| Total_Scans              | = 1024             |
| Relaxation_Delay         | = 2[s]             |
| Recvr_Gain               | = 50               |
| Temp_Get                 | = 19.1[dC]         |
| X_90_Width               | = 11.8[us]         |
| X_Acq_Time               | = 1.03809024[s]    |
| X_Angle                  | = 30[deg]          |
| X_Atn                    | = 8[dB]            |
| X_Pulse                  | = 3.93333333[us]   |
| Irr_Atn_Dec              | = 29.152[dB]       |
| Irr_Atn_Dec_Calc         | = 29.152[dB]       |
| Irr_Atn_Dec_Default_Calc | = 29.152[dB]       |
| Irr_Atn_No               | = 29.152[dB]       |
| Irr_Dec_Bandwidth_Hz     | = 4.7826087[kHz]   |
| Irr_Dec_Bandwidth_Ppm    | = 11.96303566[ppm] |
| Irr_Dec_Freq             | = 399.78219838[MH  |
| Irr_Dec_Merit_Factor     | = 2.2              |
| Irr_Decoupling           | = TRUE             |
| Irr_No                   | = TRUE             |
| Irr_Noise                | = WALTZ            |



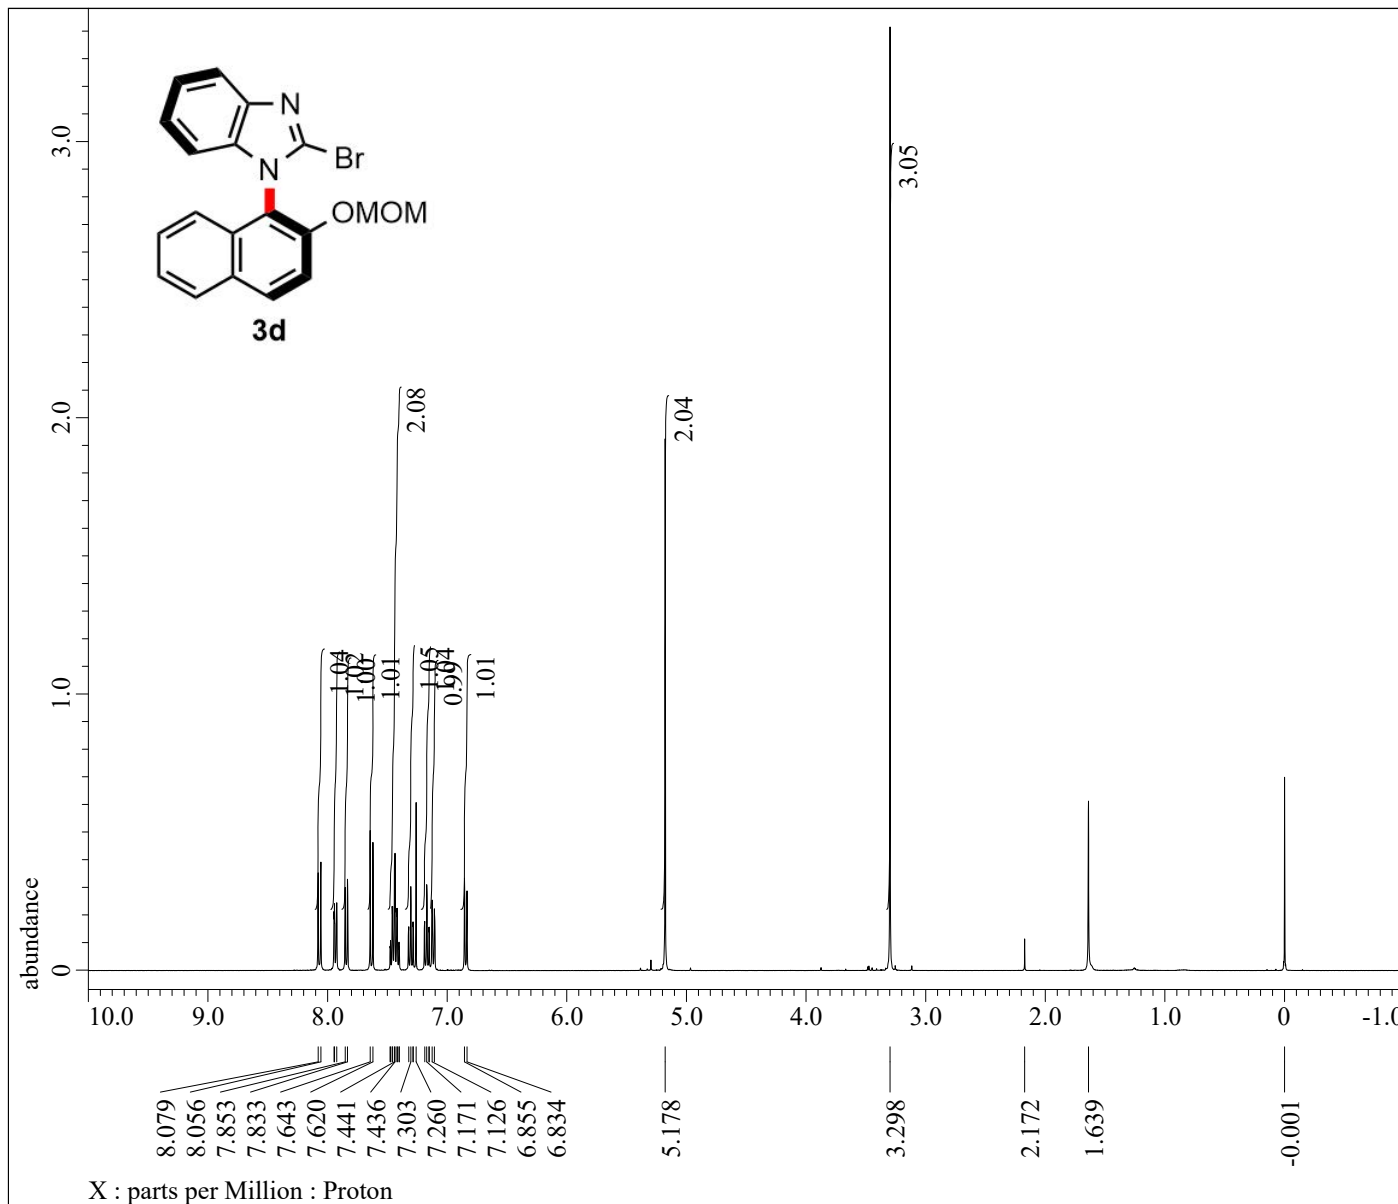

|                   |                      |
|-------------------|----------------------|
| Filename          | = MI-chiral-BenzImi- |
| Author            | = delta              |
| Experiment        | = proton_auto.jpg    |
| Sample Id         | = MI-chiral-BenzImi- |
| Solvent           | = CHLOROFORM-D       |
| Actual_Start_Time | = 7-SEP-2023 09:23:  |
| Revision_Time     | = 13-OCT-2023 02:16: |
| Comment           | = MI-chiral-BenzImi- |
| Data_Format       | = 1D COMPLEX         |
| Dim_Size          | = 13107              |
| Dim_Title         | = Proton             |
| Dim_Units         | = [ppm]              |
| Dimensions        | = X                  |
| Spectrometer      | = JNM-ECZ400S/L1     |
| Field_Strength    | = 9.389766[T] (400[M |
| X_Acq_Duration    | = 2.18628096[s]      |
| X_Domain          | = Proton             |
| X_Freq            | = 399.78219838[MHz]  |
| X_Offset          | = 5[ppm]             |
| X_Points          | = 16384              |
| X_Prescans        | = 1                  |
| X_Resolution      | = 0.45739775[Hz]     |
| X_Sweep           | = 7.4940048[kHz]     |
| X_Sweep_Clipped   | = 5.99520384[kHz]    |
| Irr_Domain        | = Proton             |
| Irr_Freq          | = 399.78219838[MHz]  |
| Irr_Offset        | = 5[ppm]             |
| Tri_Domain        | = Proton             |
| Tri_Freq          | = 399.78219838[MHz]  |
| Tri_Offset        | = 5[ppm]             |
| Blanking          | = 2[us]              |
| Clipped           | = FALSE              |
| Scans             | = 8                  |
| Total_Scans       | = 8                  |
| Relaxation_Delay  | = 5[s]               |
| Recvr_Gain        | = 56                 |
| Temp_Get          | = 19.9[dC]           |
| X_90_Width        | = 8[us]              |
| X_Acq_Time        | = 2.18628096[s]      |
| X_Angle           | = 45[deg]            |
| X_Atn             | = 6[dB]              |
| X_Pulse           | = 4[us]              |
| Irr_Mode          | = Off                |
| Tri_Mode          | = Off                |
| Dante_Loop        | = 500                |
| Dante_Presat      | = FALSE              |
| Decimation_Rate   | = 0                  |
| Experiment_Path   | = c:\Program Files\J |
| Initial_Wait      | = 1[s]               |
| Phase             | = {0, 90, 270, 180,  |

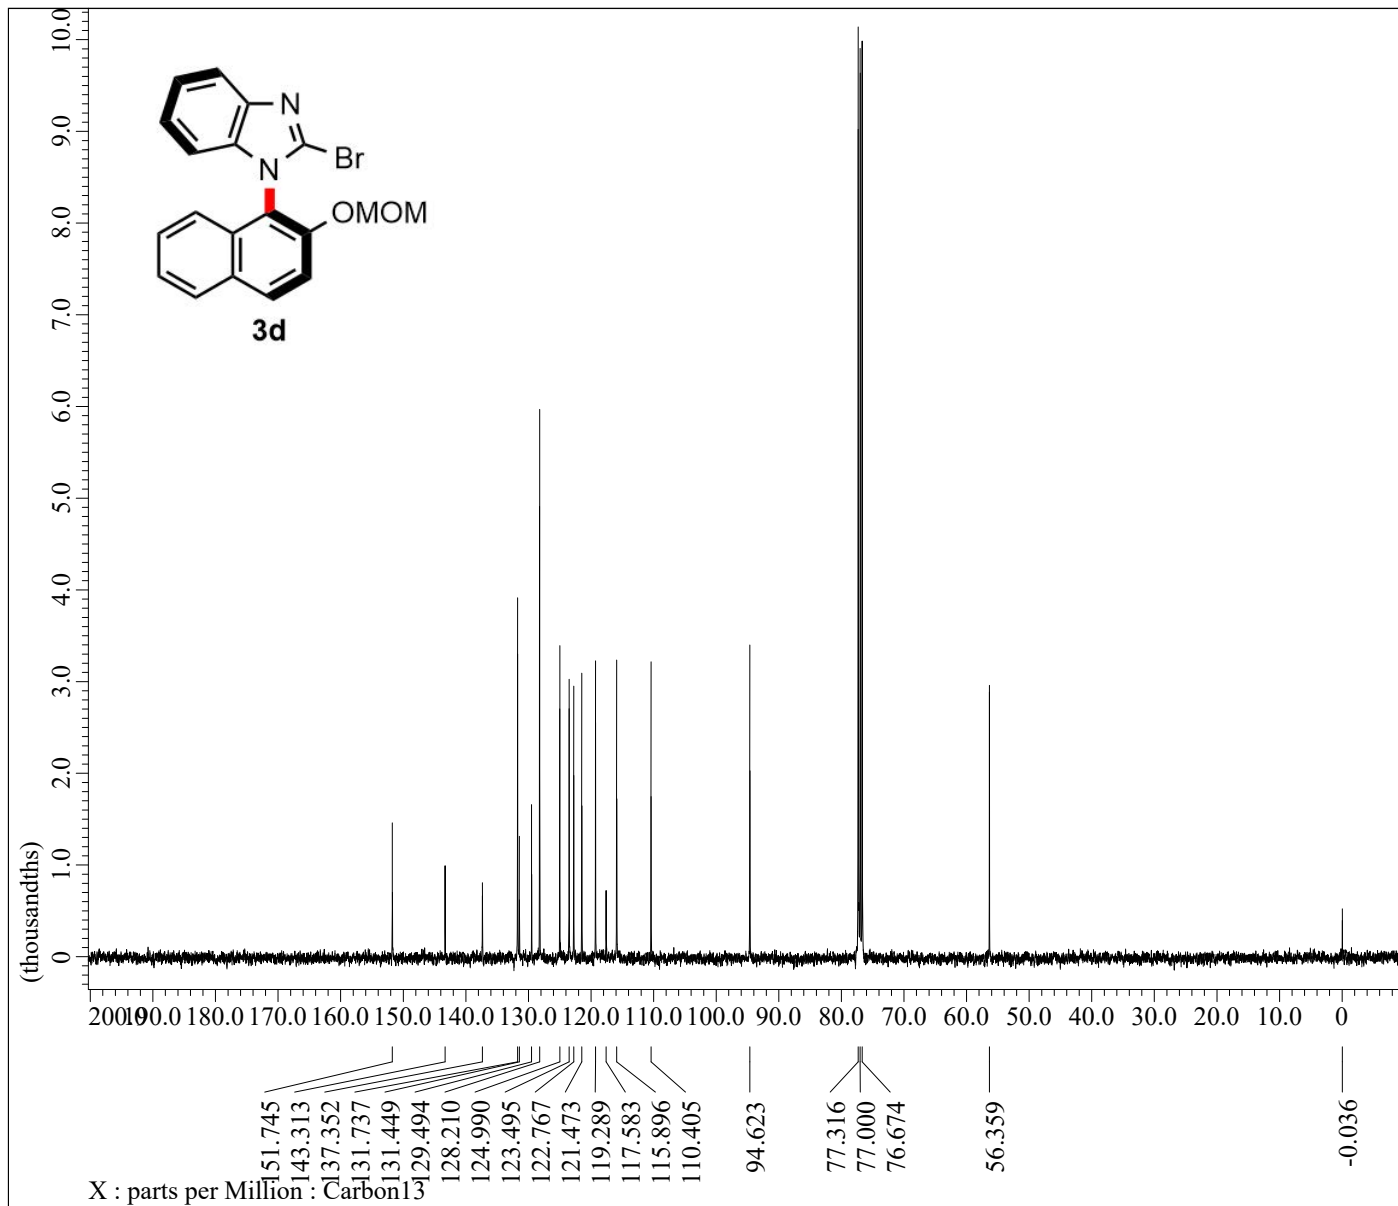

```

Filename           = download (5)-3.
Author            = delta
Experiment        = carbon_auto.jpg
Sample_Id         = MI-BenzImi-Br-N
Solvent           = CHLOROFORM-D
Actual_Start_Time = 14-OCT-2023 03:
Revision_Time     = 18-OCT-2023 21:

Comment           = MI-BenzImi-Br-N
Data_Format       = 1D COMPLEX
Dim_Size          = 26214
Dim_Title         = Carbon13
Dim_Units         = [ppm]
Dimensions        = X
Spectrometer      = JNM-ECZ400S/L1

Field_Strength    = 9.389766[T] (40
X_Acq_Duration    = 1.03809024[s]
X_Domain          = Carbon13
X_Freq            = 100.52530333[MH
X_Offset          = 100[ppm]
X_Points          = 32768
X_Prescans        = 4
X_Resolution      = 0.96330739[Hz]
X_Sweep           = 31.56565657[kHz
X_Sweep_Clipped   = 25.25252525[kHz
Irr_Domain        = Proton
Irr_Freq          = 399.78219838[MH
Irr_Offset        = 5[ppm]
Blanking          = 5[us]
Clipped           = TRUE
Scans             = 512
Total_Scans       = 512

Relaxation_Delay  = 2[s]
Recvr_Gain        = 50
Temp_Get          = 19.6[dC]
X_90_Width        = 11.8[us]
X_Acq_Time        = 1.03809024[s]
X_Angle           = 30[deg]
X_Atn             = 8[dB]
X_Pulse           = 3.93333333[us]
Irr_Atn_Dec       = 29.152[dB]
Irr_Atn_Dec_Calc  = 29.152[dB]
Irr_Atn_Dec_Default_Calc = 29.152[dB]
Irr_Atn_Noise    = 29.152[dB]
Irr_Dec_Bandwidth_Hz = 4.7826087[kHz]
Irr_Dec_Bandwidth_Ppm = 11.96303566[ppm]
Irr_Dec_Freq      = 399.78219838[MH
Irr_Dec_Merit_Factor = 2.2
Irr_Decoupling    = TRUE
Irr_Noise         = TRUE
Irr_Noise         = WALTZ
  
```

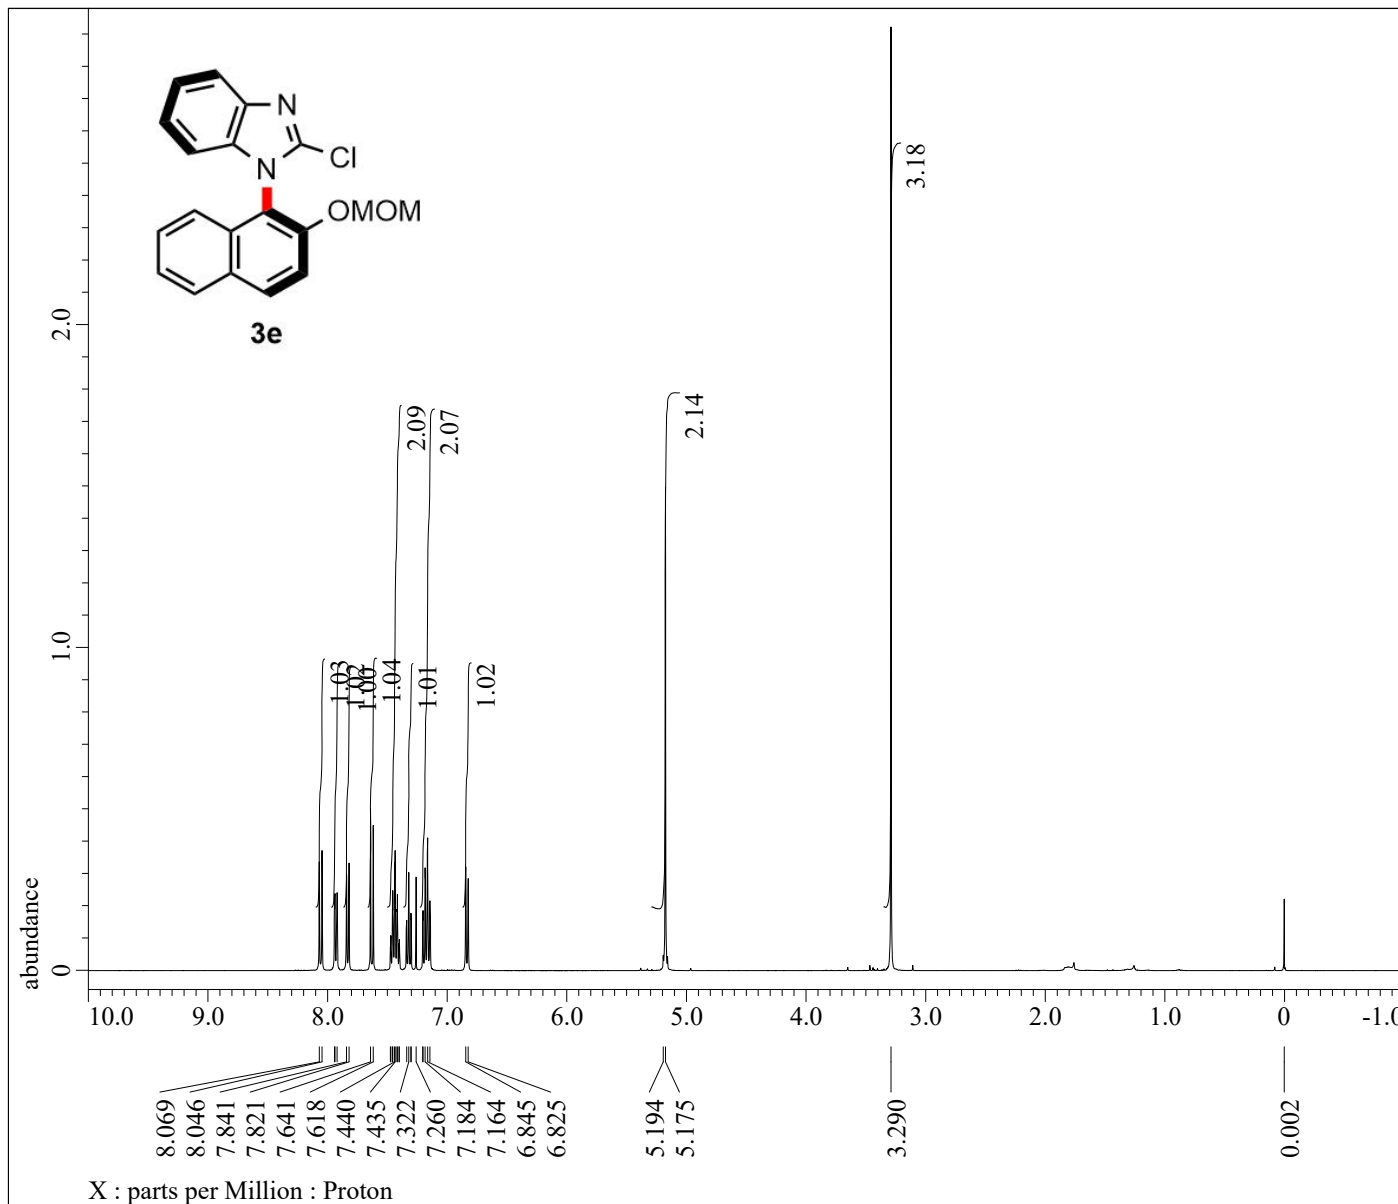

|                   |                      |
|-------------------|----------------------|
| Filename          | = MI-5-8-BenzImi-Cl  |
| Author            | = delta              |
| Experiment        | = proton_auto.jpg    |
| Sample Id         | = MI-5-8-BenzImi-Cl  |
| Solvent           | = CHLOROFORM-D       |
| Actual_Start_Time | = 7-SEP-2023 10:53:  |
| Revision_Time     | = 13-OCT-2023 02:35: |
| Comment           | = MI-5-8-BenzImi-Cl  |
| Data_Format       | = 1D COMPLEX         |
| Dim_Size          | = 13107              |
| Dim_Title         | = Proton             |
| Dim_Units         | = [ppm]              |
| Dimensions        | = X                  |
| Spectrometer      | = JNM-ECZ400S/L1     |
| Field_Strength    | = 9.389766[T] (400[M |
| X_Acq_Duration    | = 2.18628096[s]      |
| X_Domain          | = Proton             |
| X_Freq            | = 399.78219838[MHz]  |
| X_Offset          | = 5[ppm]             |
| X_Points          | = 16384              |
| X_Prescans        | = 1                  |
| X_Resolution      | = 0.45739775[Hz]     |
| X_Sweep           | = 7.4940048[kHz]     |
| X_Sweep_Clipped   | = 5.99520384[kHz]    |
| Irr_Domain        | = Proton             |
| Irr_Freq          | = 399.78219838[MHz]  |
| Irr_Offset        | = 5[ppm]             |
| Tri_Domain        | = Proton             |
| Tri_Freq          | = 399.78219838[MHz]  |
| Tri_Offset        | = 5[ppm]             |
| Blanking          | = 2[us]              |
| Clipped           | = FALSE              |
| Scans             | = 8                  |
| Total_Scans       | = 8                  |
| Relaxation_Delay  | = 5[s]               |
| Recvr_Gain        | = 46                 |
| Temp_Get          | = 20.7[dC]           |
| X_90_Width        | = 8[us]              |
| X_Acq_Time        | = 2.18628096[s]      |
| X_Angle           | = 45[deg]            |
| X_Atn             | = 6[dB]              |
| X_Pulse           | = 4[us]              |
| Irr_Mode          | = Off                |
| Tri_Mode          | = Off                |
| Dante_Loop        | = 500                |
| Dante_Presat      | = FALSE              |
| Decimation_Rate   | = 0                  |
| Experiment_Path   | = c:\Program Files\J |
| Initial_Wait      | = 1[s]               |
| Phase             | = {0, 90, 270, 180,  |

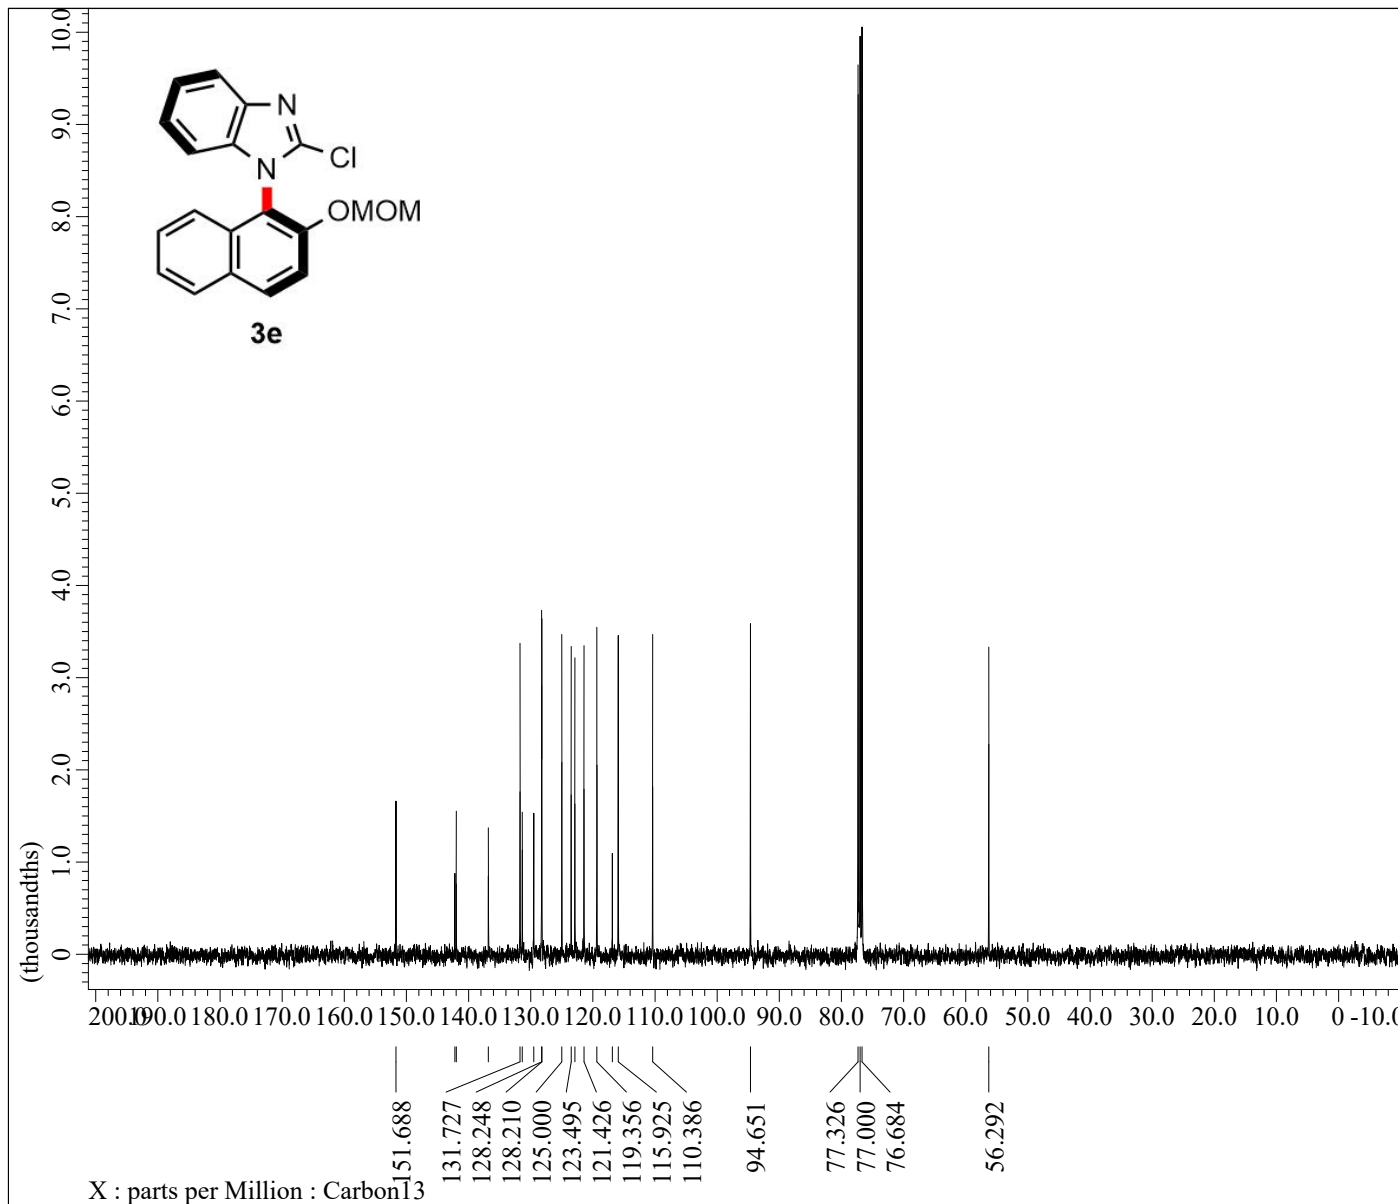

```

Filename           = MI-5-8-chiral-B
Author             = delta
Experiment         = carbon_auto.jpg
Sample_Id         = MI-5-8-chiral-B
Solvent           = CHLOROFORM-D
Actual_Start_Time = 7-SEP-2023 20:
Revision_Time     = 14-OCT-2023 03:

Comment           = MI-5-8-chiral-B
Data_Format       = 1D COMPLEX
Dim_Size          = 26214
Dim_Title         = Carbon13
Dim_Units         = [ppm]
Dimensions        = X
Spectrometer      = JNM-ECZ400S/L1

Field_Strength    = 9.389766[T] (40
X_Acq_Duration    = 1.03809024[s]
X_Domain          = Carbon13
X_Freq            = 100.52530333[MH
X_Offset          = 100[ppm]
X_Points          = 32768
X_Prescans        = 4
X_Resolution      = 0.96330739[Hz]
X_Sweep           = 31.56565657[kHz
X_Sweep_Clipped   = 25.25252525[kHz
Irr_Domain        = Proton
Irr_Freq          = 399.78219838[MH
Irr_Offset        = 5[ppm]
Blanking          = 5[us]
Clipped           = TRUE
Scans             = 256
Total_Scans       = 256

Relaxation_Delay  = 2[s]
Recvr_Gain        = 50
Temp_Get          = 20.7[dC]
X_90_Width        = 11.1[us]
X_Acq_Time        = 1.03809024[s]
X_Angle           = 30[deg]
X_Atn             = 8[dB]
X_Pulse           = 3.7[us]
Irr_Atn_Dec       = 29.152[dB]
Irr_Atn_Dec_Calc = 29.152[dB]
Irr_Atn_Dec_Default_Calc = 29.152[dB]
Irr_Atn_Noise    = 29.152[dB]
Irr_Dec_Bandwidth_Hz = 4.7826087[kHz]
Irr_Dec_Bandwidth_Ppm = 11.96303566[ppm]
Irr_Dec_Freq     = 399.78219838[MH
Irr_Dec_Merit_Factor = 2.2
Irr_Decoupling   = TRUE
Irr_Noise        = TRUE
Irr_Noise        = WALTZ
  
```

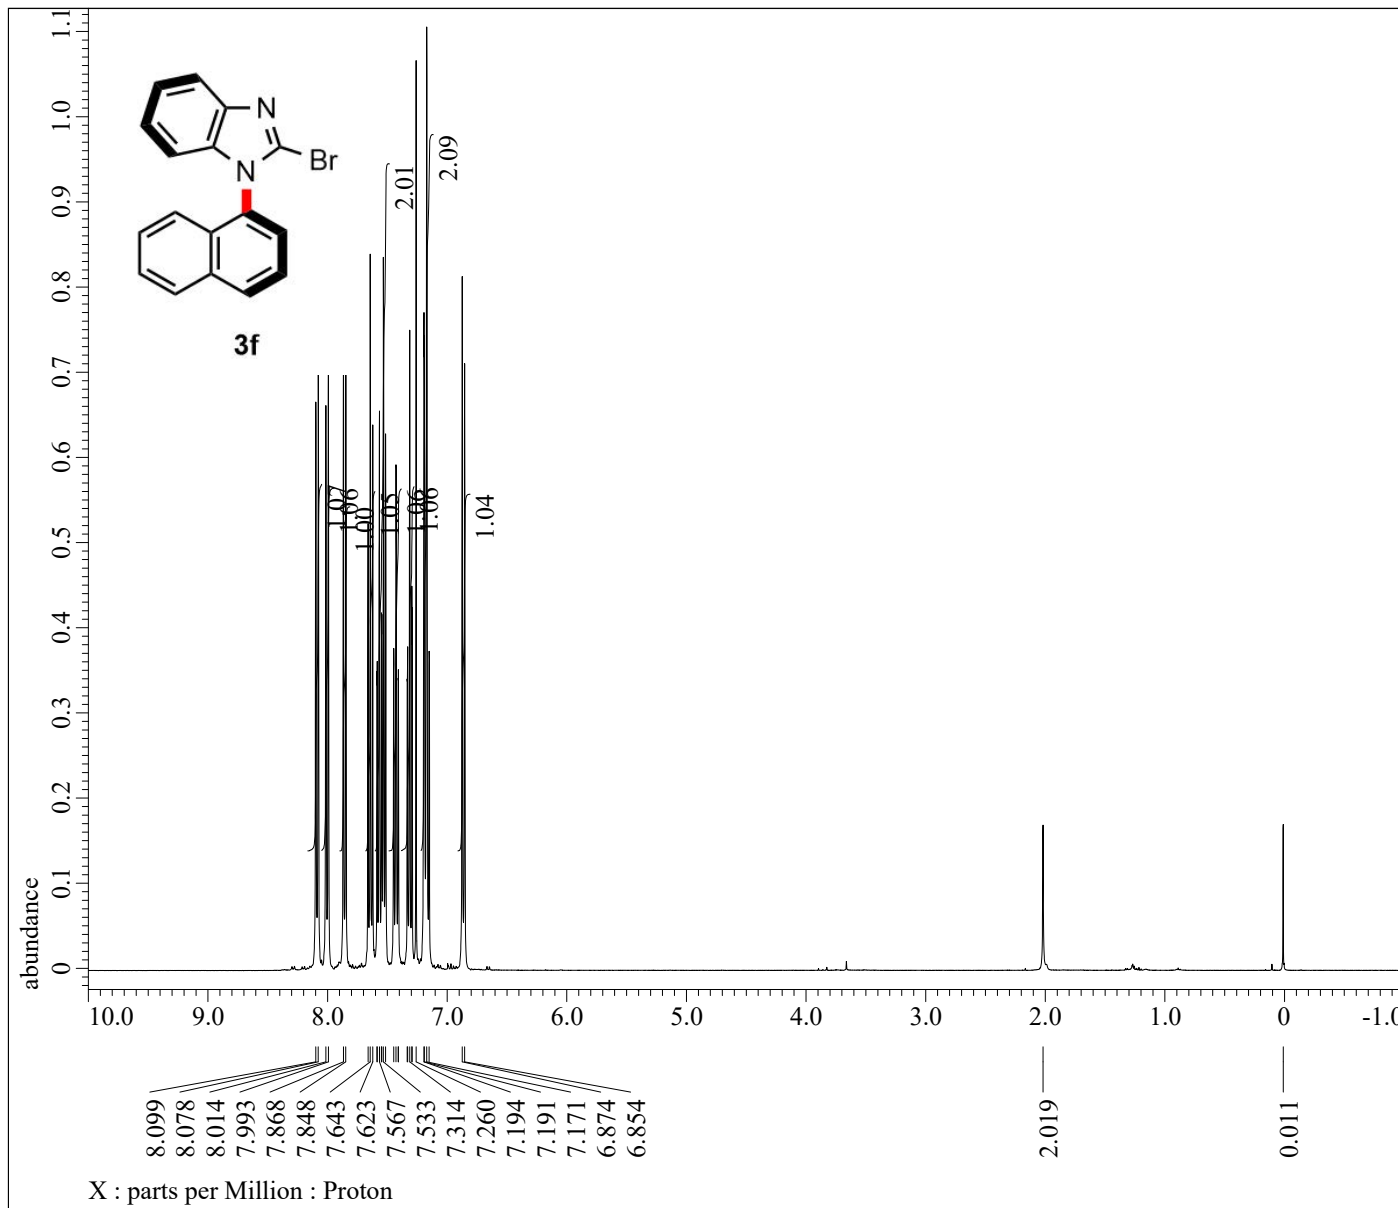

|                   |                      |
|-------------------|----------------------|
| Filename          | = MI-chiral-BenzImi- |
| Author            | = delta              |
| Experiment        | = proton_auto.jpg    |
| Sample Id         | = MI-chiral-BenzImi- |
| Solvent           | = CHLOROFORM-D       |
| Actual_Start_Time | = 7-SEP-2023 21:50:  |
| Revision_Time     | = 13-OCT-2023 03:20: |
| Comment           | = MI-chiral-BenzImi- |
| Data_Format       | = 1D COMPLEX         |
| Dim_Size          | = 13107              |
| Dim_Title         | = Proton             |
| Dim_Units         | = [ppm]              |
| Dimensions        | = X                  |
| Spectrometer      | = JNM-ECZ400S/L1     |
| Field_Strength    | = 9.389766[T] (400[M |
| X_Acq_Duration    | = 2.18628096[s]      |
| X_Domain          | = Proton             |
| X_Freq            | = 399.78219838[MHz]  |
| X_Offset          | = 5[ppm]             |
| X_Points          | = 16384              |
| X_Prescans        | = 1                  |
| X_Resolution      | = 0.45739775[Hz]     |
| X_Sweep           | = 7.4940048[kHz]     |
| X_Sweep_Clipped   | = 5.99520384[kHz]    |
| Irr_Domain        | = Proton             |
| Irr_Freq          | = 399.78219838[MHz]  |
| Irr_Offset        | = 5[ppm]             |
| Tri_Domain        | = Proton             |
| Tri_Freq          | = 399.78219838[MHz]  |
| Tri_Offset        | = 5[ppm]             |
| Blanking          | = 2[us]              |
| Clipped           | = FALSE              |
| Scans             | = 8                  |
| Total_Scans       | = 8                  |
| Relaxation_Delay  | = 5[s]               |
| Recvr_Gain        | = 46                 |
| Temp_Get          | = 20.7[dC]           |
| X_90_Width        | = 8[us]              |
| X_Acq_Time        | = 2.18628096[s]      |
| X_Angle           | = 45[deg]            |
| X_Atn             | = 6[dB]              |
| X_Pulse           | = 4[us]              |
| Irr_Mode          | = Off                |
| Tri_Mode          | = Off                |
| Dante_Loop        | = 500                |
| Dante_Presat      | = FALSE              |
| Decimation_Rate   | = 0                  |
| Experiment_Path   | = c:\Program Files\J |
| Initial_Wait      | = 1[s]               |
| Phase             | = {0, 90, 270, 180,  |

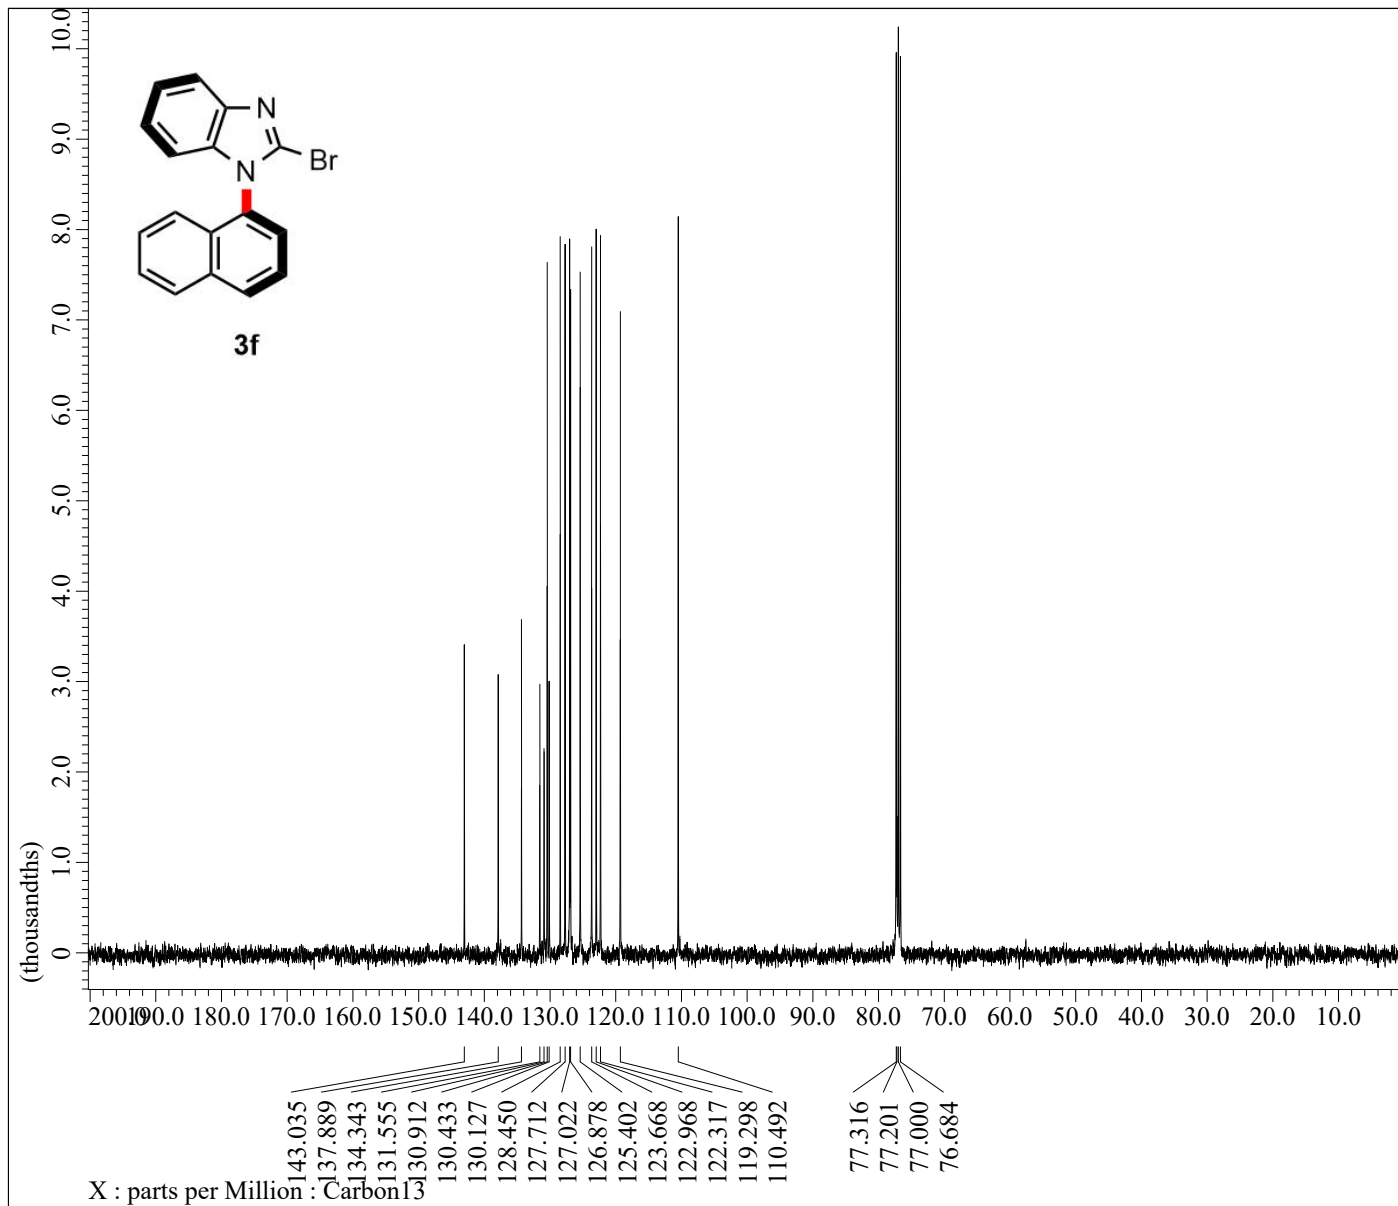

```

Filename           = MI-chiral-BenzI
Author             = delta
Experiment         = carbon_auto.jpg
Sample_Id          = MI-chiral-BenzI
Solvent            = CHLOROFORM-D
Actual_Start_Time  = 7-SEP-2023 20:
Revision_Time      = 14-OCT-2023 03:

Comment           = MI-chiral-BenzI
Data_Format       = 1D COMPLEX
Dim_Size          = 26214
Dim_Title         = Carbon13
Dim_Units         = [ppm]
Dimensions        = X
Spectrometer      = JNM-ECZ400S/L1

Field_Strength    = 9.389766[T] (40
X_Acq_Duration    = 1.03809024[s]
X_Domain          = Carbon13
X_Freq            = 100.52530333[MH
X_Offset          = 100[ppm]
X_Points          = 32768
X_Prescans        = 4
X_Resolution      = 0.96330739[Hz]
X_Sweep           = 31.56565657[kHz]
X_Sweep_Clipped  = 25.25252525[kHz]
Irr_Domain        = Proton
Irr_Freq          = 399.78219838[MH
Irr_Offset        = 5[ppm]
Blanking          = 5[us]
Clipped           = FALSE
Scans             = 256
Total_Scans       = 256

Relaxation_Delay  = 2[s]
Recvr_Gain        = 50
Temp_Get          = 21[dC]
X_90_Width        = 11.1[us]
X_Acq_Time        = 1.03809024[s]
X_Angle           = 30[deg]
X_Atn             = 8[dB]
X_Pulse           = 3.7[us]
Irr_Atn_Dec       = 29.152[dB]
Irr_Atn_Dec_Calc = 29.152[dB]
Irr_Atn_Dec_Default_Calc = 29.152[dB]
Irr_Atn_Noise    = 29.152[dB]
Irr_Dec_Bandwidth_Hz = 4.7826087[kHz]
Irr_Dec_Bandwidth_Ppm = 11.96303566[ppm]
Irr_Dec_Freq     = 399.78219838[MH
Irr_Dec_Merit_Factor = 2.2
Irr_Decoupling   = TRUE
Irr_Noise        = TRUE
Irr_Noise        = WALTZ

```

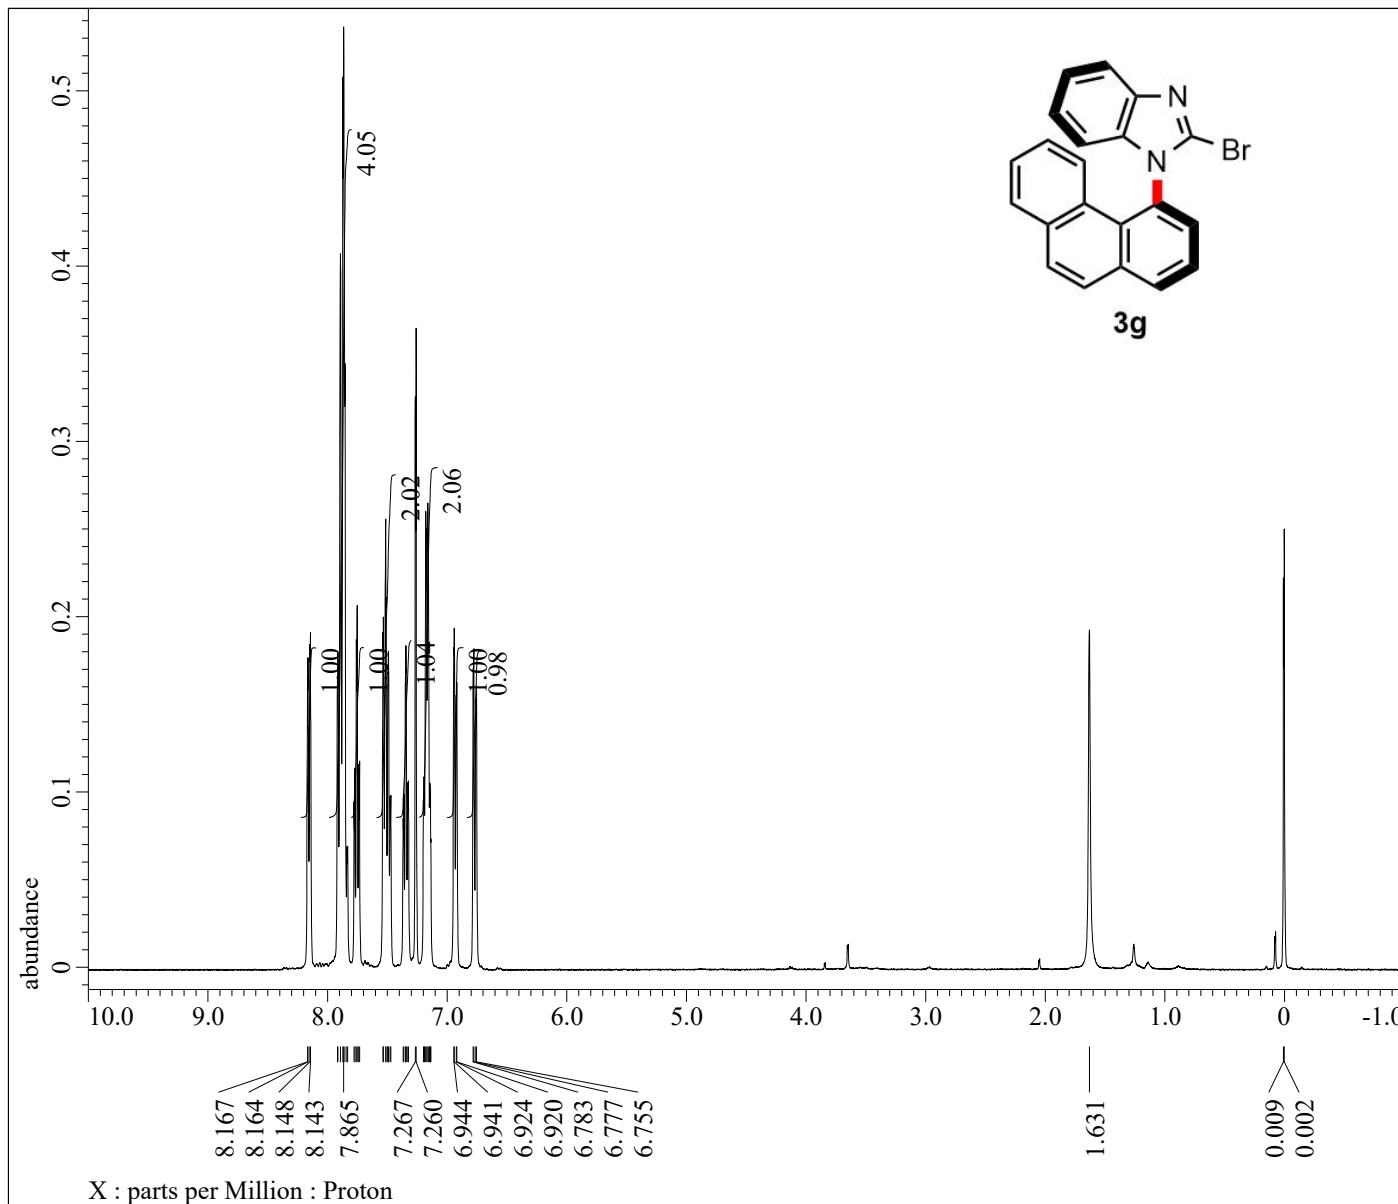

|                   |                      |
|-------------------|----------------------|
| Filename          | = MI-5-27-benzImi-Br |
| Author            | = delta              |
| Experiment        | = proton_auto.jxp    |
| Sample Id         | = MI-5-27-benzImi-Br |
| Solvent           | = CHLOROFORM-D       |
| Actual_Start_Time | = 7-SEP-2023 09:27:  |
| Revision_Time     | = 13-OCT-2023 03:36: |
| Comment           | = MI-5-27-benzImi-Br |
| Data_Format       | = 1D COMPLEX         |
| Dim_Size          | = 13107              |
| Dim_Title         | = Proton             |
| Dim_Units         | = [ppm]              |
| Dimensions        | = X                  |
| Spectrometer      | = JNM-ECZ400S/L1     |
| Field_Strength    | = 9.389766[T] (400[M |
| X_Acq_Duration    | = 2.18628096[s]      |
| X_Domain          | = Proton             |
| X_Freq            | = 399.78219838[MHz]  |
| X_Offset          | = 5[ppm]             |
| X_Points          | = 16384              |
| X_Prescans        | = 1                  |
| X_Resolution      | = 0.45739775[Hz]     |
| X_Sweep           | = 7.4940048[kHz]     |
| X_Sweep_Clipped   | = 5.99520384[kHz]    |
| Irr_Domain        | = Proton             |
| Irr_Freq          | = 399.78219838[MHz]  |
| Irr_Offset        | = 5[ppm]             |
| Tri_Domain        | = Proton             |
| Tri_Freq          | = 399.78219838[MHz]  |
| Tri_Offset        | = 5[ppm]             |
| Blanking          | = 2[us]              |
| Clipped           | = FALSE              |
| Scans             | = 8                  |
| Total_Scans       | = 8                  |
| Relaxation_Delay  | = 5[s]               |
| Recvr_Gain        | = 56                 |
| Temp_Get          | = 20[dC]             |
| X_90_Width        | = 8[us]              |
| X_Acq_Time        | = 2.18628096[s]      |
| X_Angle           | = 45[deg]            |
| X_Atn             | = 6[dB]              |
| X_Pulse           | = 4[us]              |
| Irr_Mode          | = Off                |
| Tri_Mode          | = Off                |
| Dante_Loop        | = 500                |
| Dante_Presat      | = FALSE              |
| Decimation_Rate   | = 0                  |
| Experiment_Path   | = c:\Program Files\J |
| Initial_Wait      | = 1[s]               |
| Phase             | = {0, 90, 270, 180,  |

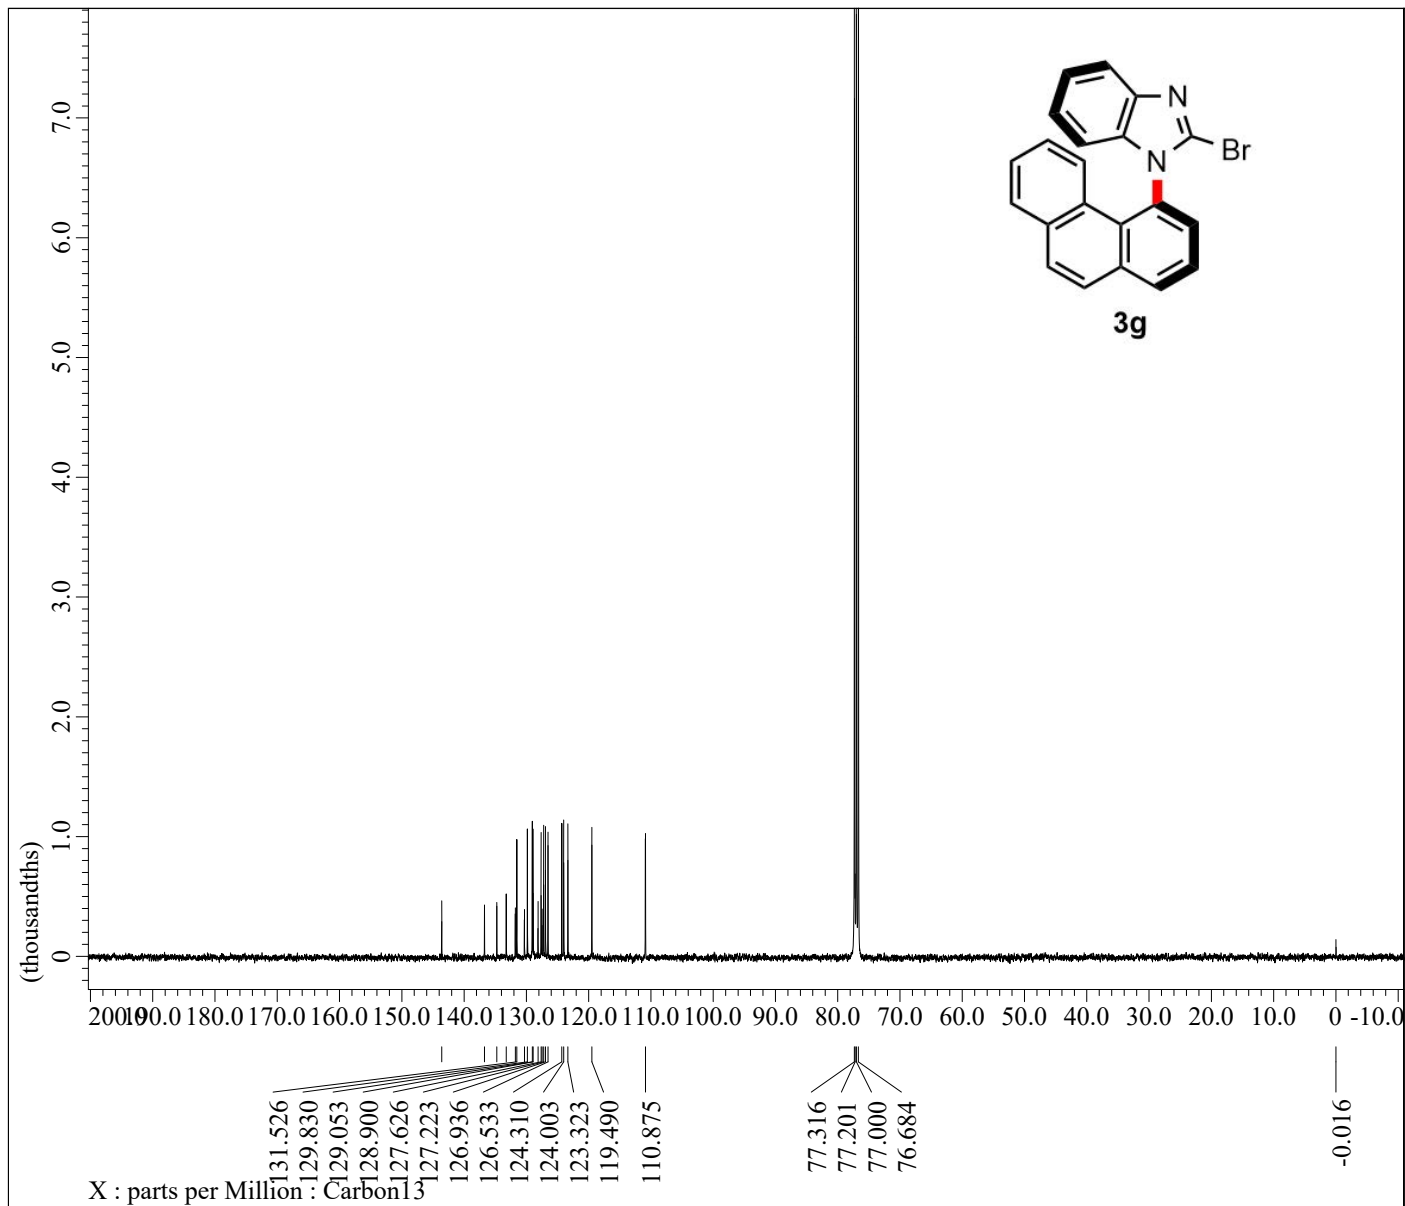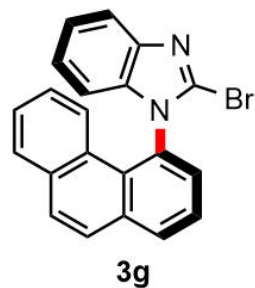

|                          |                   |
|--------------------------|-------------------|
| Filename                 | = MI-5-27-BenzImi |
| Author                   | = delta           |
| Experiment               | = carbon_auto.jpg |
| Sample Id                | = MI-5-27-BenzImi |
| Solvent                  | = CHLOROFORM-D    |
| Actual_Start_Time        | = 8-SEP-2023 03:  |
| Revision_Time            | = 14-OCT-2023 03: |
| Comment                  | = MI-5-27-BenzImi |
| Data_Format              | = 1D COMPLEX      |
| Dim_Size                 | = 26214           |
| Dim_Title                | = Carbon13        |
| Dim_Units                | = [ppm]           |
| Dimensions               | = X               |
| Spectrometer             | = JNM-ECZ400S/L1  |
| Field_Strength           | = 9.389766[T] (40 |
| X_Acq_Duration           | = 1.03809024[s]   |
| X_Domain                 | = Carbon13        |
| X_Freq                   | = 100.52530333[MH |
| X_Offset                 | = 100[ppm]        |
| X_Points                 | = 32768           |
| X_Prescans               | = 4               |
| X_Resolution             | = 0.96330739[Hz]  |
| X_Sweep                  | = 31.56565657[kHz |
| X_Sweep_Clipped          | = 25.25252525[kHz |
| Irr_Domain               | = Proton          |
| Irr_Freq                 | = 399.78219838[MH |
| Irr_Offset               | = 5[ppm]          |
| Blanking                 | = 5[us]           |
| Clipped                  | = TRUE            |
| Scans                    | = 3072            |
| Total_Scans              | = 3072            |
| Relaxation_Delay         | = 2[s]            |
| Recvr_Gain               | = 50              |
| Temp_Get                 | = 19.6[dC]        |
| X_90_Width               | = 11.1[us]        |
| X_Acq_Time               | = 1.03809024[s]   |
| X_Angle                  | = 30[deg]         |
| X_Atn                    | = 8[dB]           |
| X_Pulse                  | = 3.7[us]         |
| Irr_Atn_Dec              | = 29.152[dB]      |
| Irr_Atn_Dec_Calc         | = 29.152[dB]      |
| Irr_Atn_Dec_Default_Calc | = 29.152[dB]      |
| Irr_Atn_No               | = 29.152[dB]      |
| Irr_Dec_Bandwidth_Hz     | = 4.7826087[kHz]  |
| Irr_Dec_Bandwidth_Ppm    | = 11.96303566[ppm |
| Irr_Dec_Freq             | = 399.78219838[MH |
| Irr_Dec_Merit_Factor     | = 2.2             |
| Irr_Decoupling           | = TRUE            |
| Irr_No                   | = TRUE            |
| Irr_Noise                | = WALTZ           |



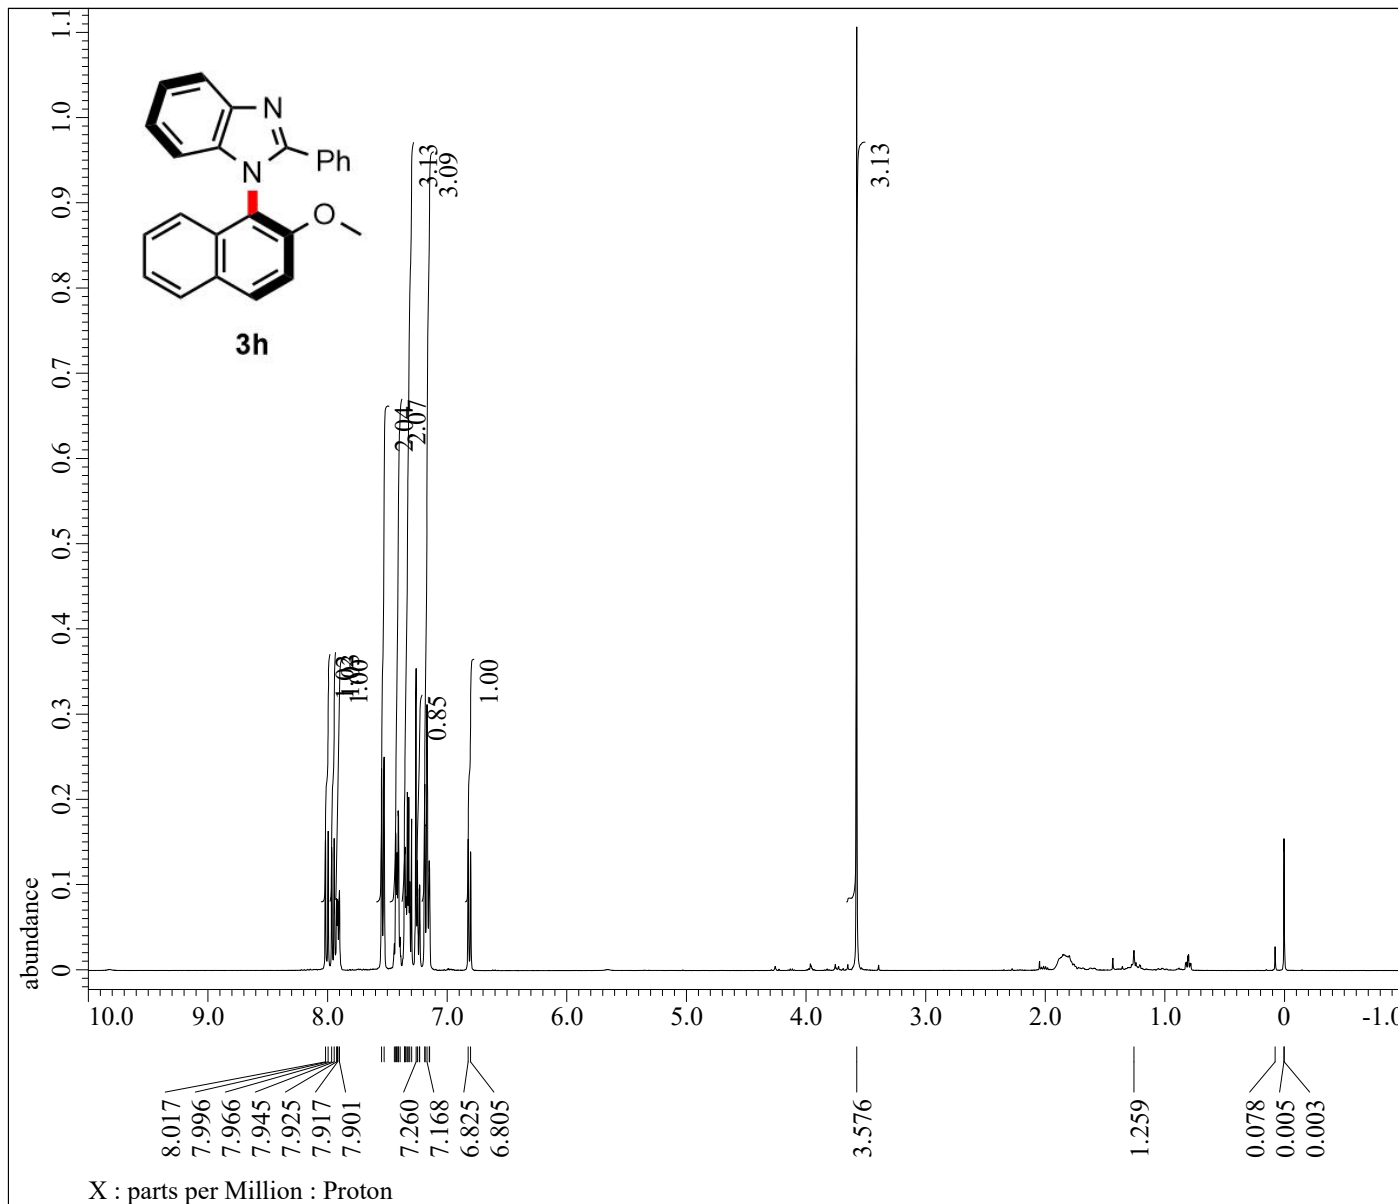

|                   |                      |
|-------------------|----------------------|
| Filename          | = MI-5-30-BenzImi-Ph |
| Author            | = delta              |
| Experiment        | = proton_auto.jxp    |
| Sample Id         | = MI-5-30-BenzImi-Ph |
| Solvent           | = CHLOROFORM-D       |
| Actual_Start_Time | = 22-SEP-2023 19:44: |
| Revision_Time     | = 13-OCT-2023 04:04: |
| Comment           | = MI-5-30-BenzImi-Ph |
| Data_Format       | = 1D COMPLEX         |
| Dim_Size          | = 13107              |
| Dim_Title         | = Proton             |
| Dim_Units         | = [ppm]              |
| Dimensions        | = X                  |
| Spectrometer      | = JNM-ECZ400S/L1     |
| Field_Strength    | = 9.389766[T] (400[M |
| X_Acq_Duration    | = 2.18628096[s]      |
| X_Domain          | = Proton             |
| X_Freq            | = 399.78219838[MHz]  |
| X_Offset          | = 5[ppm]             |
| X_Points          | = 16384              |
| X_Prescans        | = 1                  |
| X_Resolution      | = 0.45739775[Hz]     |
| X_Sweep           | = 7.4940048[kHz]     |
| X_Sweep_Clipped   | = 5.99520384[kHz]    |
| Irr_Domain        | = Proton             |
| Irr_Freq          | = 399.78219838[MHz]  |
| Irr_Offset        | = 5[ppm]             |
| Tri_Domain        | = Proton             |
| Tri_Freq          | = 399.78219838[MHz]  |
| Tri_Offset        | = 5[ppm]             |
| Blanking          | = 2[us]              |
| Clipped           | = FALSE              |
| Scans             | = 8                  |
| Total_Scans       | = 8                  |
| Relaxation_Delay  | = 5[s]               |
| Recvr_Gain        | = 46                 |
| Temp_Get          | = 18.3[dC]           |
| X_90_Width        | = 8[us]              |
| X_Acq_Time        | = 2.18628096[s]      |
| X_Angle           | = 45[deg]            |
| X_Atn             | = 6[dB]              |
| X_Pulse           | = 4[us]              |
| Irr_Mode          | = Off                |
| Tri_Mode          | = Off                |
| Dante_Loop        | = 500                |
| Dante_Presat      | = FALSE              |
| Decimation_Rate   | = 0                  |
| Experiment_Path   | = c:\Program Files\J |
| Initial_Wait      | = 1[s]               |
| Phase             | = {0, 90, 270, 180,  |

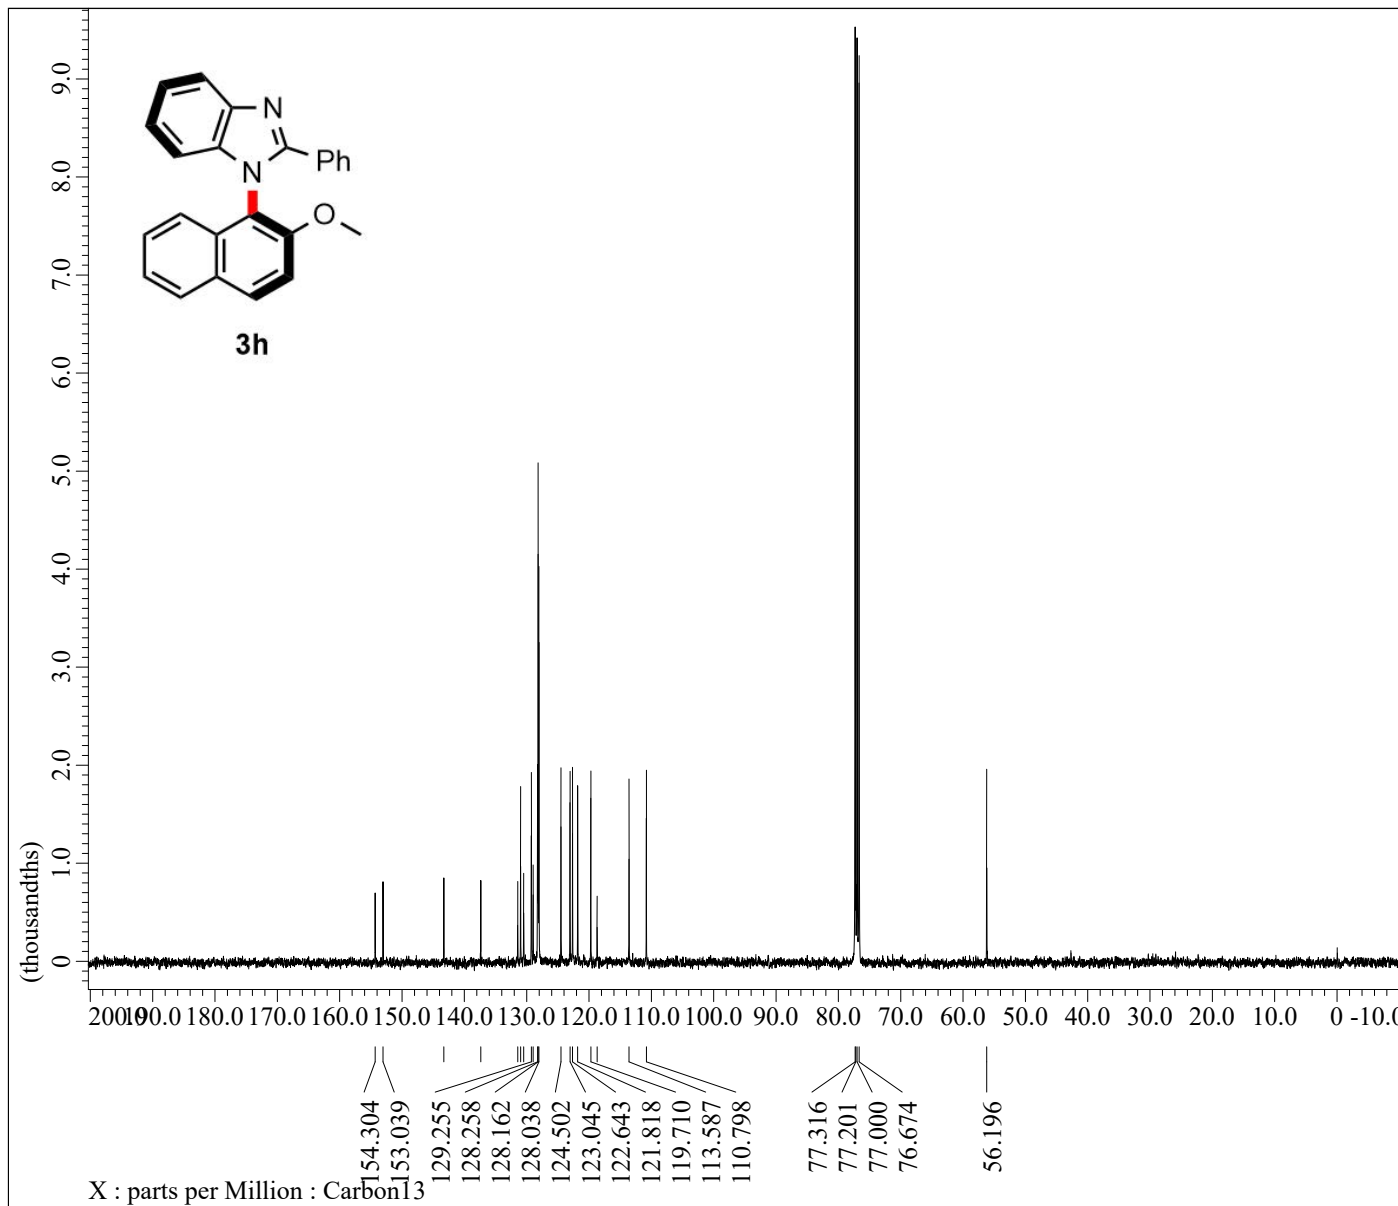

|                          |                   |
|--------------------------|-------------------|
| Filename                 | = MI-5-30-BenzImi |
| Author                   | = delta           |
| Experiment               | = carbon_auto.jpg |
| Sample Id                | = MI-5-30-BenzImi |
| Solvent                  | = CHLOROFORM-D    |
| Actual_Start_Time        | = 7-SEP-2023 23:  |
| Revision_Time            | = 14-OCT-2023 03: |
| Comment                  | = MI-5-30-BenzImi |
| Data_Format              | = 1D COMPLEX      |
| Dim_Size                 | = 26214           |
| Dim_Title                | = Carbon13        |
| Dim_Units                | = [ppm]           |
| Dimensions               | = X               |
| Spectrometer             | = JNM-ECZ400S/L1  |
| Field_Strength           | = 9.389766[T] (40 |
| X_Acq_Duration           | = 1.03809024[s]   |
| X_Domain                 | = Carbon13        |
| X_Freq                   | = 100.52530333[MH |
| X_Offset                 | = 100[ppm]        |
| X_Points                 | = 32768           |
| X_Prescans               | = 4               |
| X_Resolution             | = 0.96330739[Hz]  |
| X_Sweep                  | = 31.56565657[kHz |
| X_Sweep_Clipped          | = 25.25252525[kHz |
| Irr_Domain               | = Proton          |
| Irr_Freq                 | = 399.78219838[MH |
| Irr_Offset               | = 5[ppm]          |
| Blanking                 | = 5[us]           |
| Clipped                  | = TRUE            |
| Scans                    | = 1024            |
| Total_Scans              | = 1024            |
| Relaxation_Delay         | = 2[s]            |
| Recvr_Gain               | = 50              |
| Temp_Get                 | = 20.5[dC]        |
| X_90_Width               | = 11.1[us]        |
| X_Acq_Time               | = 1.03809024[s]   |
| X_Angle                  | = 30[deg]         |
| X_Atn                    | = 8[dB]           |
| X_Pulse                  | = 3.7[us]         |
| Irr_Atn_Dec              | = 29.152[dB]      |
| Irr_Atn_Dec_Calc         | = 29.152[dB]      |
| Irr_Atn_Dec_Default_Calc | = 29.152[dB]      |
| Irr_Atn_No               | = 29.152[dB]      |
| Irr_Dec_Bandwidth_Hz     | = 4.7826087[kHz]  |
| Irr_Dec_Bandwidth_Ppm    | = 11.96303566[ppm |
| Irr_Dec_Freq             | = 399.78219838[MH |
| Irr_Dec_Merit_Factor     | = 2.2             |
| Irr_Decoupling           | = TRUE            |
| Irr_No                   | = TRUE            |
| Irr_Noise                | = WALTZ           |

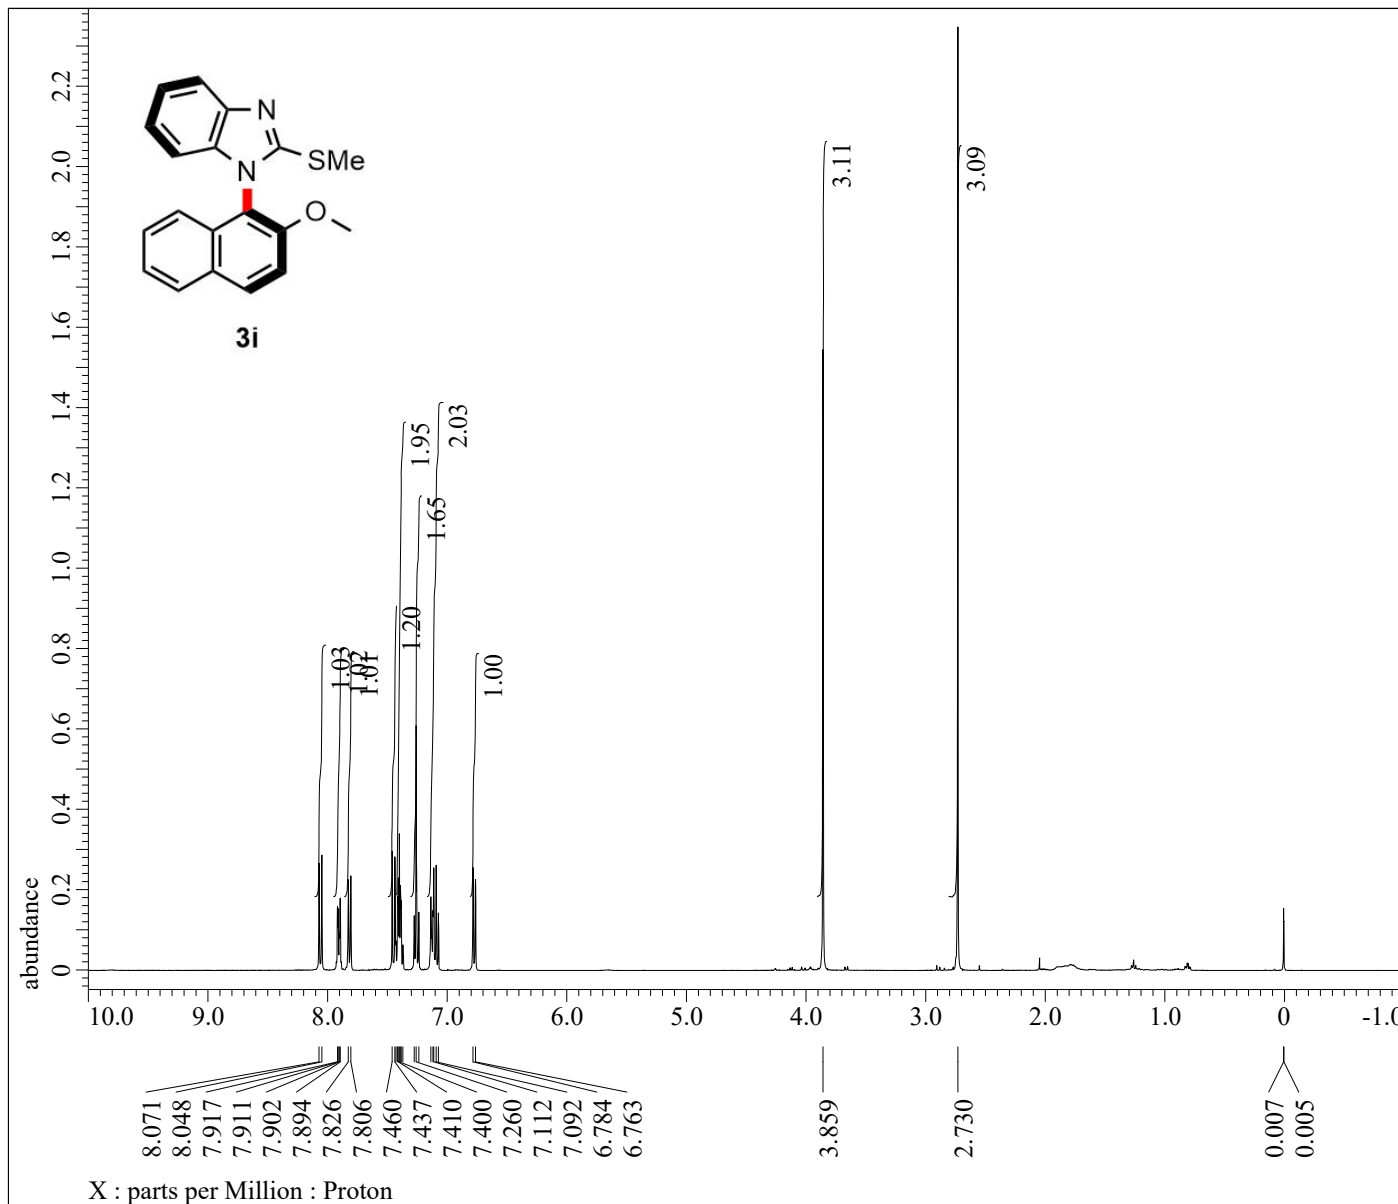

```

Filename      = RA-BenzImi-SMe-Nap
Author       = delta
Experiment   = proton_auto.jxp
Sample Id    = RA-BenzImi-SMe-Nap
Solvent      = CHLOROFORM-D
Actual_Start_Time = 7-SEP-2023 18:51:
Revision_Time = 13-OCT-2023 04:25:

Comment      = RA-BenzImi-SMe-Nap
Data_Format  = 1D COMPLEX
Dim_Size     = 13107
Dim_Title    = Proton
Dim_Units    = [ppm]
Dimensions   = X
Spectrometer = JNM-ECZ400S/L1

Field_Strength = 9.389766[T] (400[M
X_Acq_Duration = 2.18628096[s]
X_Domain       = Proton
X_Freq         = 399.78219838[MHz]
X_Offset       = 5[ppm]
X_Points       = 16384
X_Prescans     = 1
X_Resolution   = 0.45739775[Hz]
X_Sweep        = 7.4940048[kHz]
X_Sweep_Clipped = 5.99520384[kHz]
Irr_Domain     = Proton
Irr_Freq       = 399.78219838[MHz]
Irr_Offset     = 5[ppm]
Tri_Domain     = Proton
Tri_Freq       = 399.78219838[MHz]
Tri_Offset     = 5[ppm]
Blanking       = 2[us]
Clipped        = FALSE
Scans          = 8
Total_Scans    = 8

Relaxation_Delay = 5[s]
Recvr_Gain       = 46
Temp_Get         = 21.1[dC]
X_90_Width      = 8[us]
X_Acq_Time      = 2.18628096[s]
X_Angle         = 45[deg]
X_Atn           = 6[dB]
X_Pulse         = 4[us]
Irr_Mode        = Off
Tri_Mode        = Off
Dante_Loop      = 500
Dante_Presat    = FALSE
Decimation_Rate = 0
Experiment_Path = c:\Program Files\J
Initial_Wait    = 1[s]
Phase           = {0, 90, 270, 180,

```

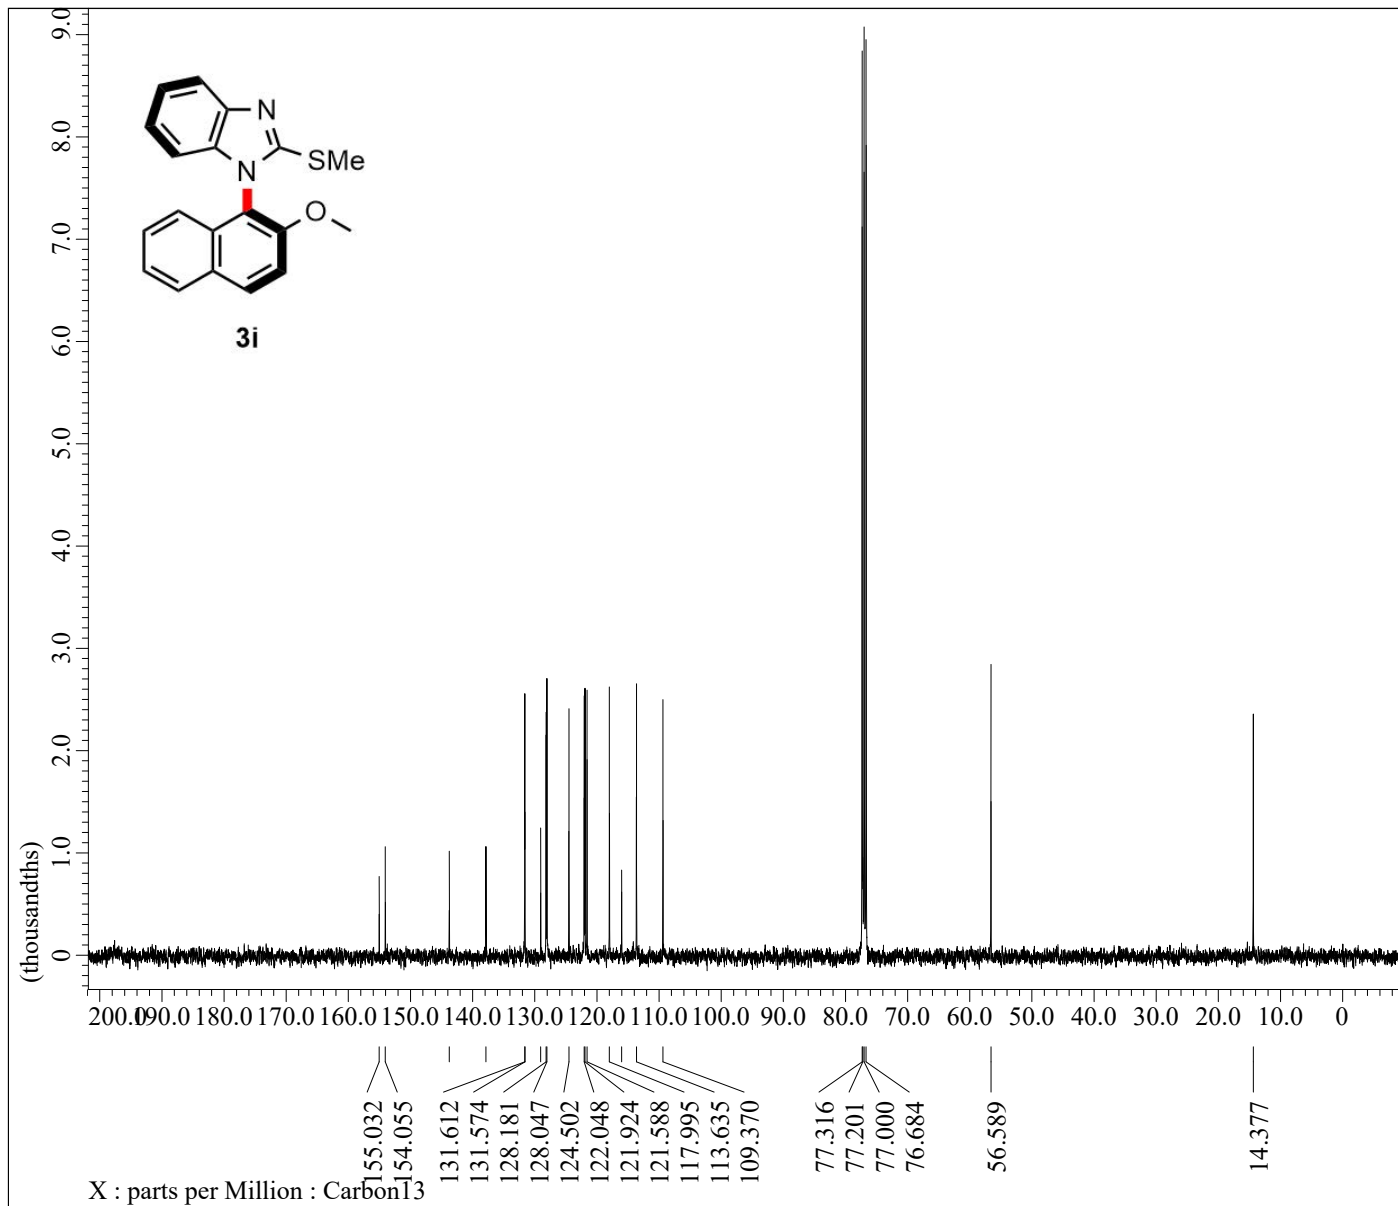

|                          |                   |
|--------------------------|-------------------|
| Filename                 | = RA-chiral-BenzI |
| Author                   | = delta           |
| Experiment               | = carbon_auto.jpg |
| Sample Id                | = RA-chiral-BenzI |
| Solvent                  | = CHLOROFORM-D    |
| Actual_Start_Time        | = 7-SEP-2023 21:  |
| Revision_Time            | = 14-OCT-2023 03: |
| Comment                  | = RA-chiral-BenzI |
| Data_Format              | = 1D COMPLEX      |
| Dim_Size                 | = 26214           |
| Dim_Title                | = Carbon13        |
| Dim_Units                | = [ppm]           |
| Dimensions               | = X               |
| Spectrometer             | = JNM-ECZ400S/L1  |
| Field_Strength           | = 9.389766[T] (40 |
| X_Acq_Duration           | = 1.03809024[s]   |
| X_Domain                 | = Carbon13        |
| X_Freq                   | = 100.52530333[MH |
| X_Offset                 | = 100[ppm]        |
| X_Points                 | = 32768           |
| X_Prescans               | = 4               |
| X_Resolution             | = 0.96330739[Hz]  |
| X_Sweep                  | = 31.56565657[kHz |
| X_Sweep_Clipped          | = 25.25252525[kHz |
| Irr_Domain               | = Proton          |
| Irr_Freq                 | = 399.78219838[MH |
| Irr_Offset               | = 5[ppm]          |
| Blanking                 | = 5[us]           |
| Clipped                  | = TRUE            |
| Scans                    | = 384             |
| Total_Scans              | = 384             |
| Relaxation_Delay         | = 2[s]            |
| Recvr_Gain               | = 50              |
| Temp_Get                 | = 20.8[dC]        |
| X_90_Width               | = 11.1[us]        |
| X_Acq_Time               | = 1.03809024[s]   |
| X_Angle                  | = 30[deg]         |
| X_Atn                    | = 8[dB]           |
| X_Pulse                  | = 3.7[us]         |
| Irr_Atn_Dec              | = 29.152[dB]      |
| Irr_Atn_Dec_Calc         | = 29.152[dB]      |
| Irr_Atn_Dec_Default_Calc | = 29.152[dB]      |
| Irr_Atn_No               | = 29.152[dB]      |
| Irr_Dec_Bandwidth_Hz     | = 4.7826087[kHz]  |
| Irr_Dec_Bandwidth_Ppm    | = 11.96303566[ppm |
| Irr_Dec_Freq             | = 399.78219838[MH |
| Irr_Dec_Merit_Factor     | = 2.2             |
| Irr_Decoupling           | = TRUE            |
| Irr_No                   | = TRUE            |
| Irr_Noise                | = WALTZ           |

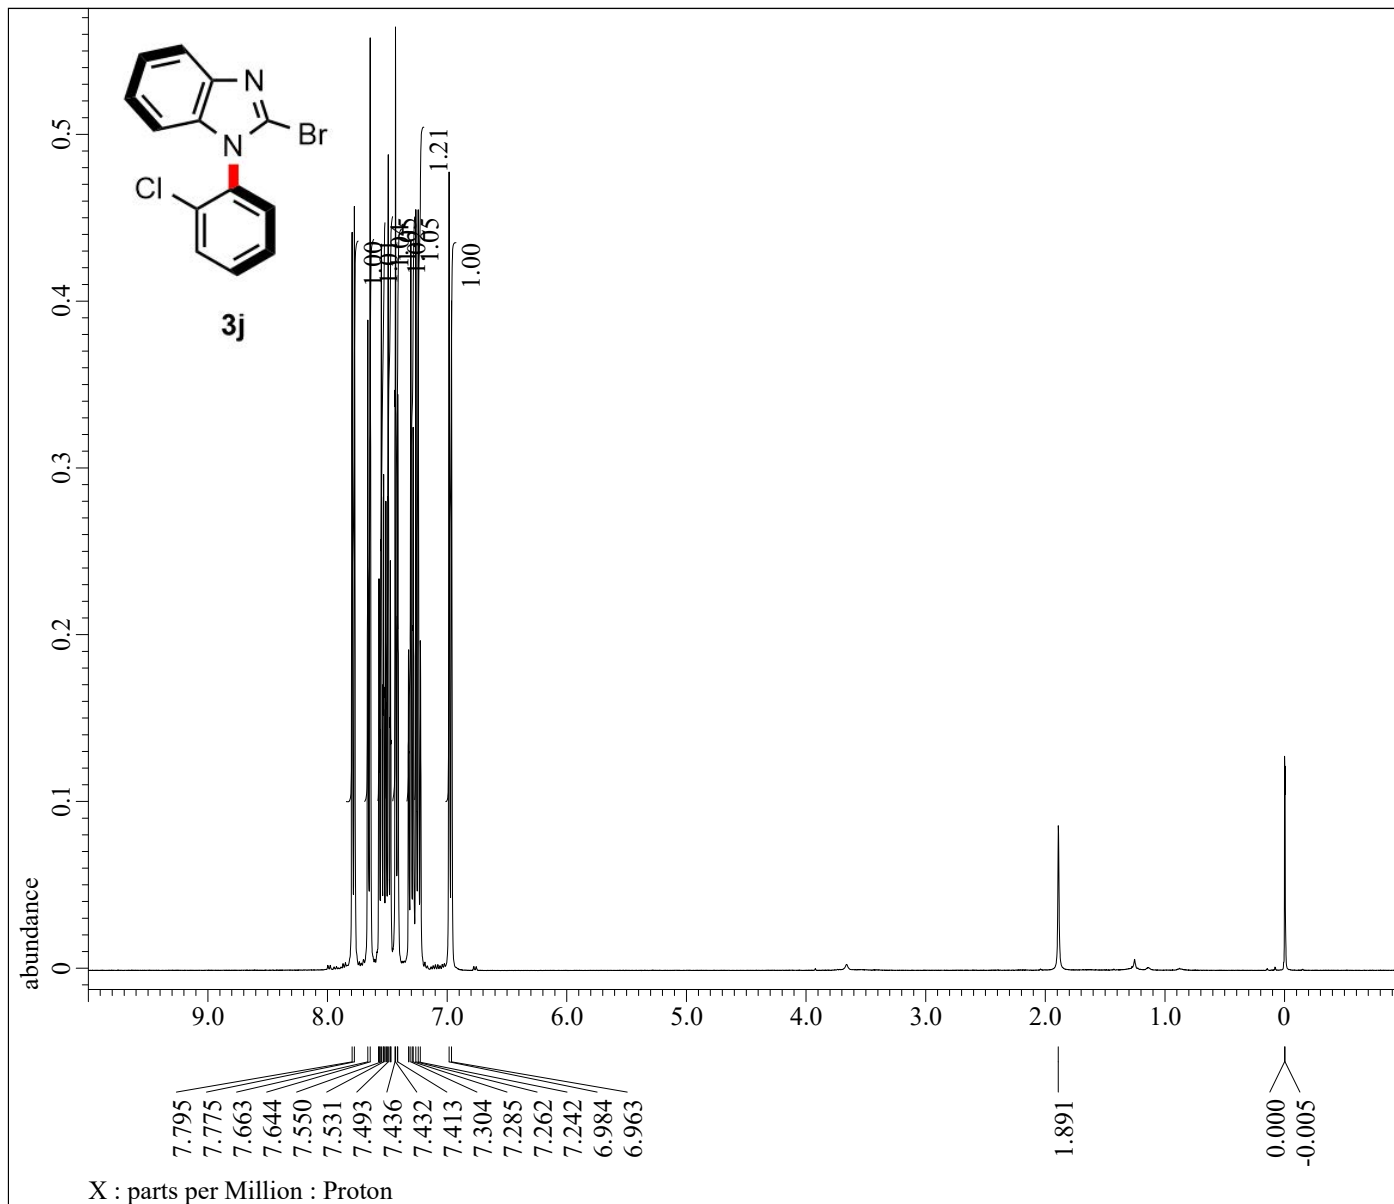

|                   |                      |
|-------------------|----------------------|
| Filename          | = MI-4-112-chiral-be |
| Author            | = delta              |
| Experiment        | = proton_auto.jpg    |
| Sample Id         | = MI-4-112-chiral-be |
| Solvent           | = CHLOROFORM-D       |
| Actual_Start_Time | = 18-APR-2023 18:42: |
| Revision_Time     | = 13-OCT-2023 15:43: |
| Comment           | = MI-4-112-chiral-be |
| Data_Format       | = 1D COMPLEX         |
| Dim_Size          | = 13107              |
| Dim_Title         | = Proton             |
| Dim_Units         | = [ppm]              |
| Dimensions        | = X                  |
| Spectrometer      | = JNM-ECZ400S/L1     |
| Field_Strength    | = 9.389766[T] (400[M |
| X_Acq_Duration    | = 2.18628096[s]      |
| X_Domain          | = Proton             |
| X_Freq            | = 399.78219838[MHz]  |
| X_Offset          | = 5[ppm]             |
| X_Points          | = 16384              |
| X_Prescans        | = 1                  |
| X_Resolution      | = 0.45739775[Hz]     |
| X_Sweep           | = 7.4940048[kHz]     |
| X_Sweep_Clipped   | = 5.99520384[kHz]    |
| Irr_Domain        | = Proton             |
| Irr_Freq          | = 399.78219838[MHz]  |
| Irr_Offset        | = 5[ppm]             |
| Tri_Domain        | = Proton             |
| Tri_Freq          | = 399.78219838[MHz]  |
| Tri_Offset        | = 5[ppm]             |
| Blanking          | = 2[us]              |
| Clipped           | = FALSE              |
| Scans             | = 8                  |
| Total_Scans       | = 8                  |
| Relaxation_Delay  | = 5[s]               |
| Recvr_Gain        | = 46                 |
| Temp_Get          | = 18.3[dC]           |
| X_90_Width        | = 8[us]              |
| X_Acq_Time        | = 2.18628096[s]      |
| X_Angle           | = 45[deg]            |
| X_Atn             | = 6[dB]              |
| X_Pulse           | = 4[us]              |
| Irr_Mode          | = Off                |
| Tri_Mode          | = Off                |
| Dante_Loop        | = 500                |
| Dante_Presat      | = FALSE              |
| Decimation_Rate   | = 0                  |
| Experiment_Path   | = c:\Program Files\J |
| Initial_Wait      | = 1[s]               |
| Phase             | = {0, 90, 270, 180,  |

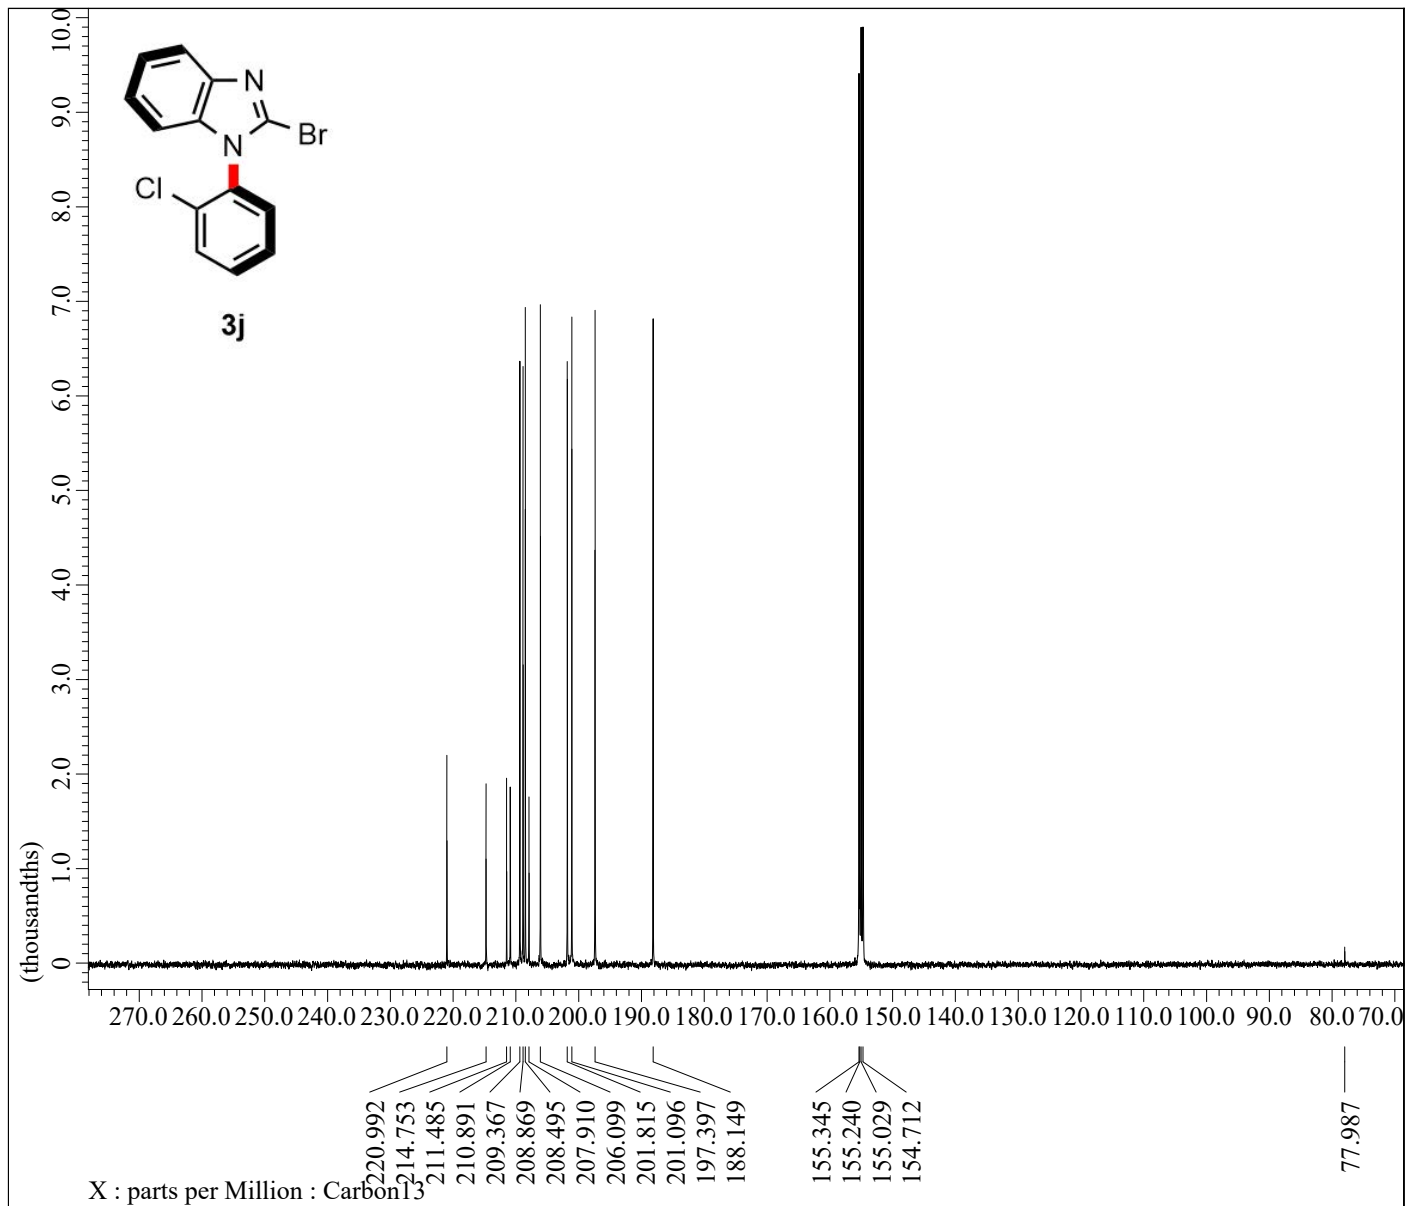

|                          |                   |
|--------------------------|-------------------|
| Filename                 | = MI-4-112-chiral |
| Author                   | = delta           |
| Experiment               | = carbon_auto.jpg |
| Sample Id                | = MI-4-112-chiral |
| Solvent                  | = CHLOROFORM-D    |
| Actual_Start_Time        | = 18-APR-2023 22: |
| Revision_Time            | = 14-OCT-2023 03: |
| Comment                  | = MI-4-112-chiral |
| Data_Format              | = 1D COMPLEX      |
| Dim_Size                 | = 26214           |
| Dim_Title                | = Carbon13        |
| Dim_Units                | = [ppm]           |
| Dimensions               | = X               |
| Spectrometer             | = JNM-ECZ400S/L1  |
| Field_Strength           | = 9.389766[T] (40 |
| X_Acq_Duration           | = 1.03809024[s]   |
| X_Domain                 | = Carbon13        |
| X_Freq                   | = 100.52530333[MH |
| X_Offset                 | = 100[ppm]        |
| X_Points                 | = 32768           |
| X_Prescans               | = 4               |
| X_Resolution             | = 0.96330739[Hz]  |
| X_Sweep                  | = 31.56565657[kHz |
| X_Sweep_Clipped          | = 25.25252525[kHz |
| Irr_Domain               | = Proton          |
| Irr_Freq                 | = 399.78219838[MH |
| Irr_Offset               | = 5[ppm]          |
| Blanking                 | = 5[us]           |
| Clipped                  | = TRUE            |
| Scans                    | = 2400            |
| Total_Scans              | = 2400            |
| Relaxation_Delay         | = 2[s]            |
| Recvr_Gain               | = 50              |
| Temp_Get                 | = 17.5[dC]        |
| X_90_Width               | = 11.1[us]        |
| X_Acq_Time               | = 1.03809024[s]   |
| X_Angle                  | = 30[deg]         |
| X_Atn                    | = 8[dB]           |
| X_Pulse                  | = 3.7[us]         |
| Irr_Atn_Dec              | = 29.152[dB]      |
| Irr_Atn_Dec_Calc         | = 29.152[dB]      |
| Irr_Atn_Dec_Default_Calc | = 29.152[dB]      |
| Irr_Atn_No               | = 29.152[dB]      |
| Irr_Dec_Bandwidth_Hz     | = 4.7826087[kHz]  |
| Irr_Dec_Bandwidth_Ppm    | = 11.96303566[ppm |
| Irr_Dec_Freq             | = 399.78219838[MH |
| Irr_Dec_Merit_Factor     | = 2.2             |
| Irr_Decoupling           | = TRUE            |
| Irr_No                   | = TRUE            |
| Irr_Noise                | = WALTZ           |

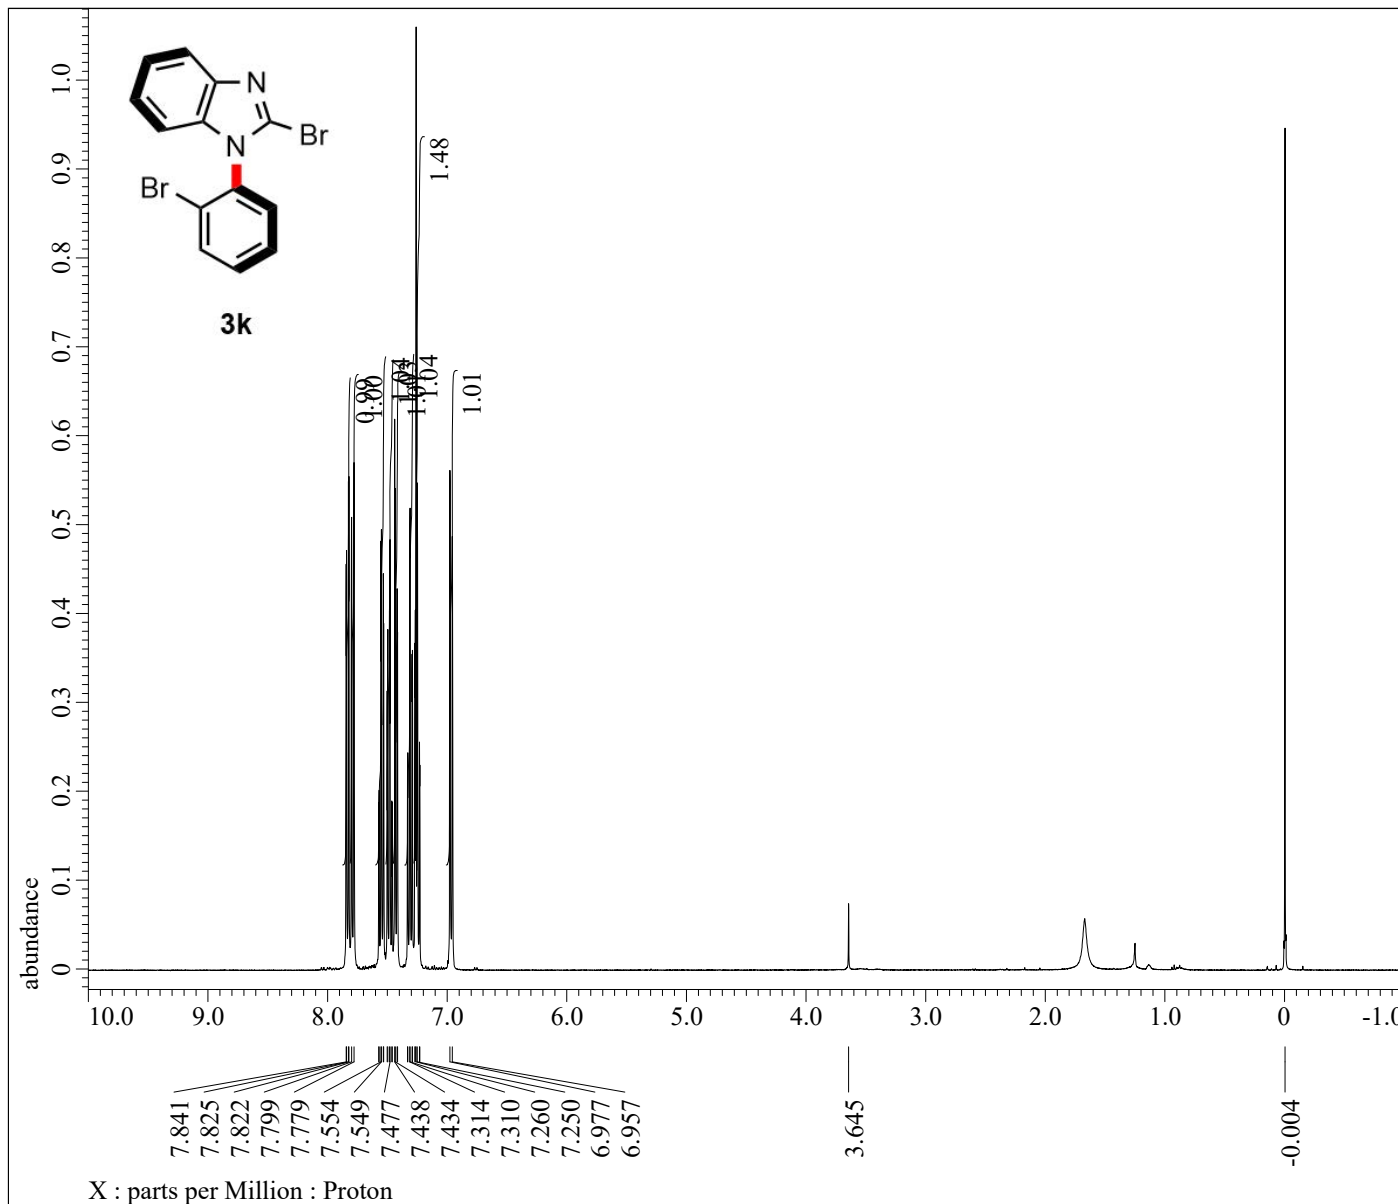

|                   |                      |
|-------------------|----------------------|
| Filename          | = YK-1-39--chiral-h  |
| Author            | = delta              |
| Experiment        | = proton_auto.jxp    |
| Sample Id         | = YK-1-39--chiral-h  |
| Solvent           | = CHLOROFORM-D       |
| Actual_Start_Time | = 18-APR-2023 18:29: |
| Revision_Time     | = 13-OCT-2023 19:42: |
| Comment           | = YK-1-39--chiral-h  |
| Data_Format       | = 1D COMPLEX         |
| Dim_Size          | = 13107              |
| Dim_Title         | = Proton             |
| Dim_Units         | = [ppm]              |
| Dimensions        | = X                  |
| Spectrometer      | = JNM-ECZ400S/L1     |
| Field_Strength    | = 9.389766[T] (400[M |
| X_Acq_Duration    | = 2.18628096[s]      |
| X_Domain          | = Proton             |
| X_Freq            | = 399.78219838[MHz]  |
| X_Offset          | = 5[ppm]             |
| X_Points          | = 16384              |
| X_Prescans        | = 1                  |
| X_Resolution      | = 0.45739775[Hz]     |
| X_Sweep           | = 7.4940048[kHz]     |
| X_Sweep_Clipped   | = 5.99520384[kHz]    |
| Irr_Domain        | = Proton             |
| Irr_Freq          | = 399.78219838[MHz]  |
| Irr_Offset        | = 5[ppm]             |
| Tri_Domain        | = Proton             |
| Tri_Freq          | = 399.78219838[MHz]  |
| Tri_Offset        | = 5[ppm]             |
| Blanking          | = 2[us]              |
| Clipped           | = FALSE              |
| Scans             | = 8                  |
| Total_Scans       | = 8                  |
| Relaxation_Delay  | = 5[s]               |
| Recvr_Gain        | = 56                 |
| Temp_Get          | = 17.4[dC]           |
| X_90_Width        | = 8[us]              |
| X_Acq_Time        | = 2.18628096[s]      |
| X_Angle           | = 45[deg]            |
| X_Atn             | = 6[dB]              |
| X_Pulse           | = 4[us]              |
| Irr_Mode          | = Off                |
| Tri_Mode          | = Off                |
| Dante_Loop        | = 500                |
| Dante_Presat      | = FALSE              |
| Decimation_Rate   | = 0                  |
| Experiment_Path   | = c:\Program Files\J |
| Initial_Wait      | = 1[s]               |
| Phase             | = {0, 90, 270, 180,  |

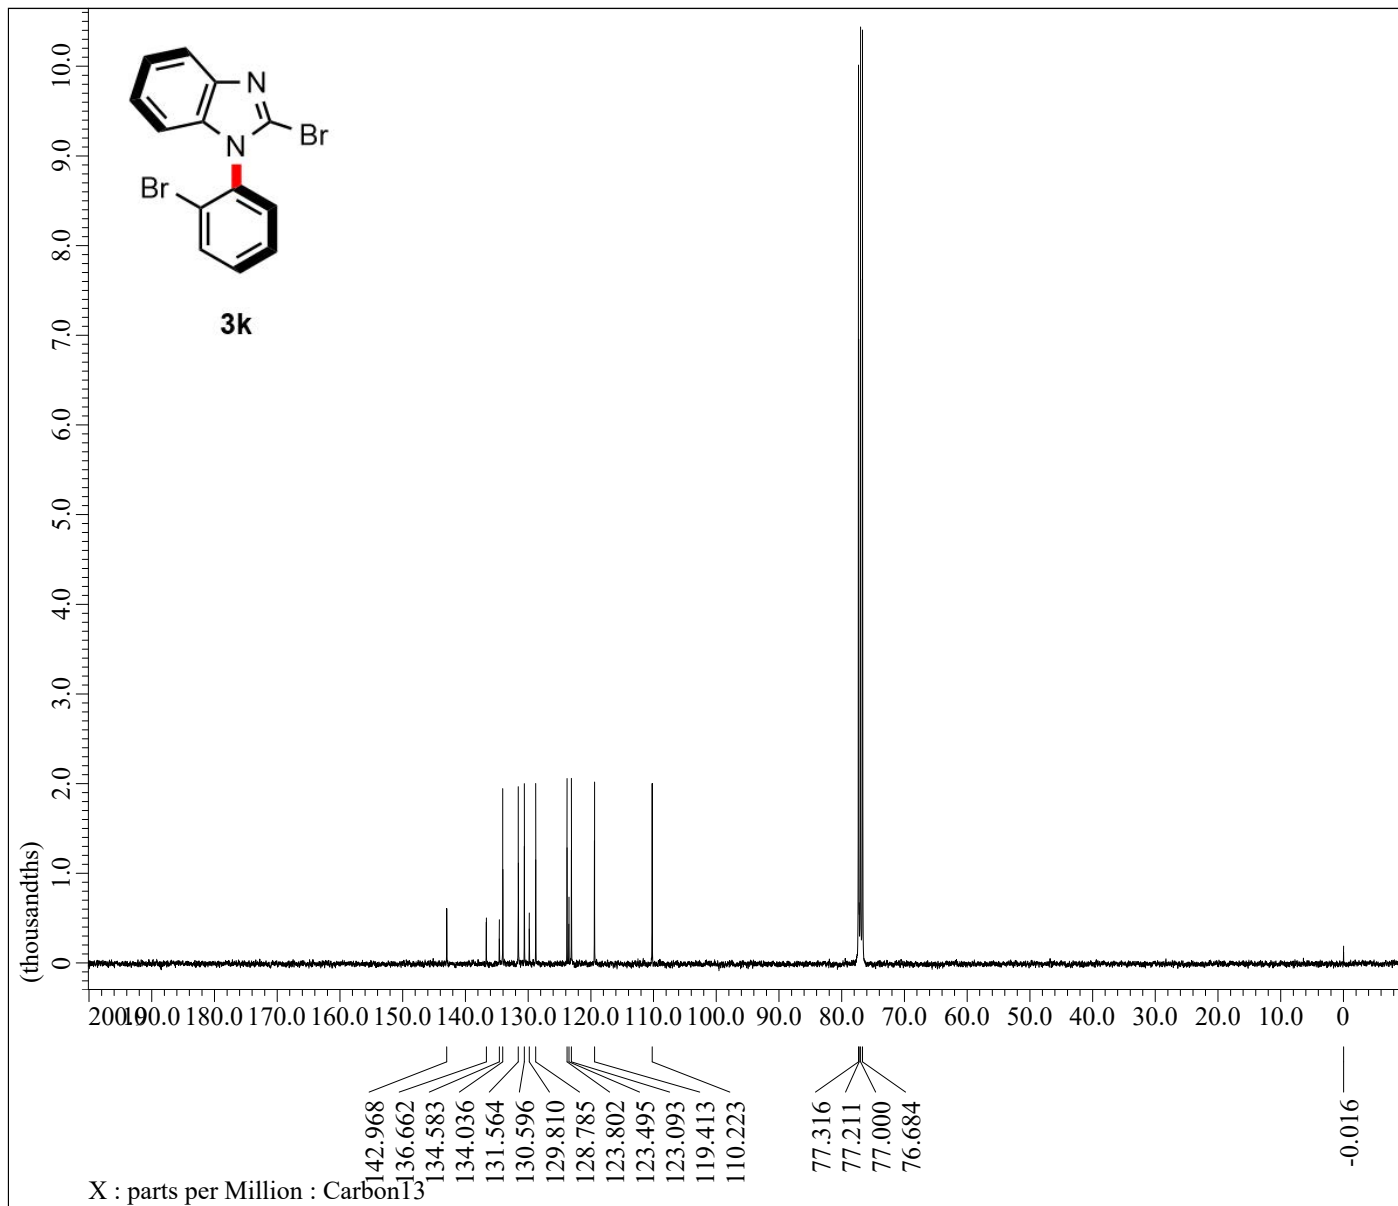

```

Filename           = YK-1-39-chiral
Author             = delta
Experiment         = carbon_auto.jpg
Sample_Id          = YK-1-39-chiral
Solvent            = CHLOROFORM-D
Actual_Start_Time  = 19-APR-2023 01:
Revision_Time      = 14-OCT-2023 03:

Comment           = YK-1-39-chiral
Data_Format       = 1D COMPLEX
Dim_Size          = 26214
Dim_Title         = Carbon13
Dim_Units         = [ppm]
Dimensions        = X
Spectrometer      = JNM-ECZ400S/L1

Field_Strength    = 9.389766[T] (40
X_Acq_Duration    = 1.03809024[s]
X_Domain          = Carbon13
X_Freq            = 100.52530333[MH
X_Offset          = 100[ppm]
X_Points          = 32768
X_Prescans        = 4
X_Resolution      = 0.96330739[Hz]
X_Sweep           = 31.56565657[kHz]
X_Sweep_Clipped  = 25.25252525[kHz]
Irr_Domain        = Proton
Irr_Freq          = 399.78219838[MH
Irr_Offset        = 5[ppm]
Blanking          = 5[us]
Clipped           = TRUE
Scans             = 2400
Total_Scans       = 2400

Relaxation_Delay  = 2[s]
Recvr_Gain        = 50
Temp_Get          = 17.4[dC]
X_90_Width        = 11.1[us]
X_Acq_Time        = 1.03809024[s]
X_Angle           = 30[deg]
X_Atn             = 8[dB]
X_Pulse           = 3.7[us]
Irr_Atn_Dec       = 29.152[dB]
Irr_Atn_Dec_Calc = 29.152[dB]
Irr_Atn_Dec_Default_Calc = 29.152[dB]
Irr_Atn_Noise    = 29.152[dB]
Irr_Dec_Bandwidth_Hz = 4.7826087[kHz]
Irr_Dec_Bandwidth_Ppm = 11.96303566[ppm]
Irr_Dec_Freq      = 399.78219838[MH
Irr_Dec_Merit_Factor = 2.2
Irr_Decoupling   = TRUE
Irr_Noise         = TRUE
Irr_Noise         = WALTZ

```



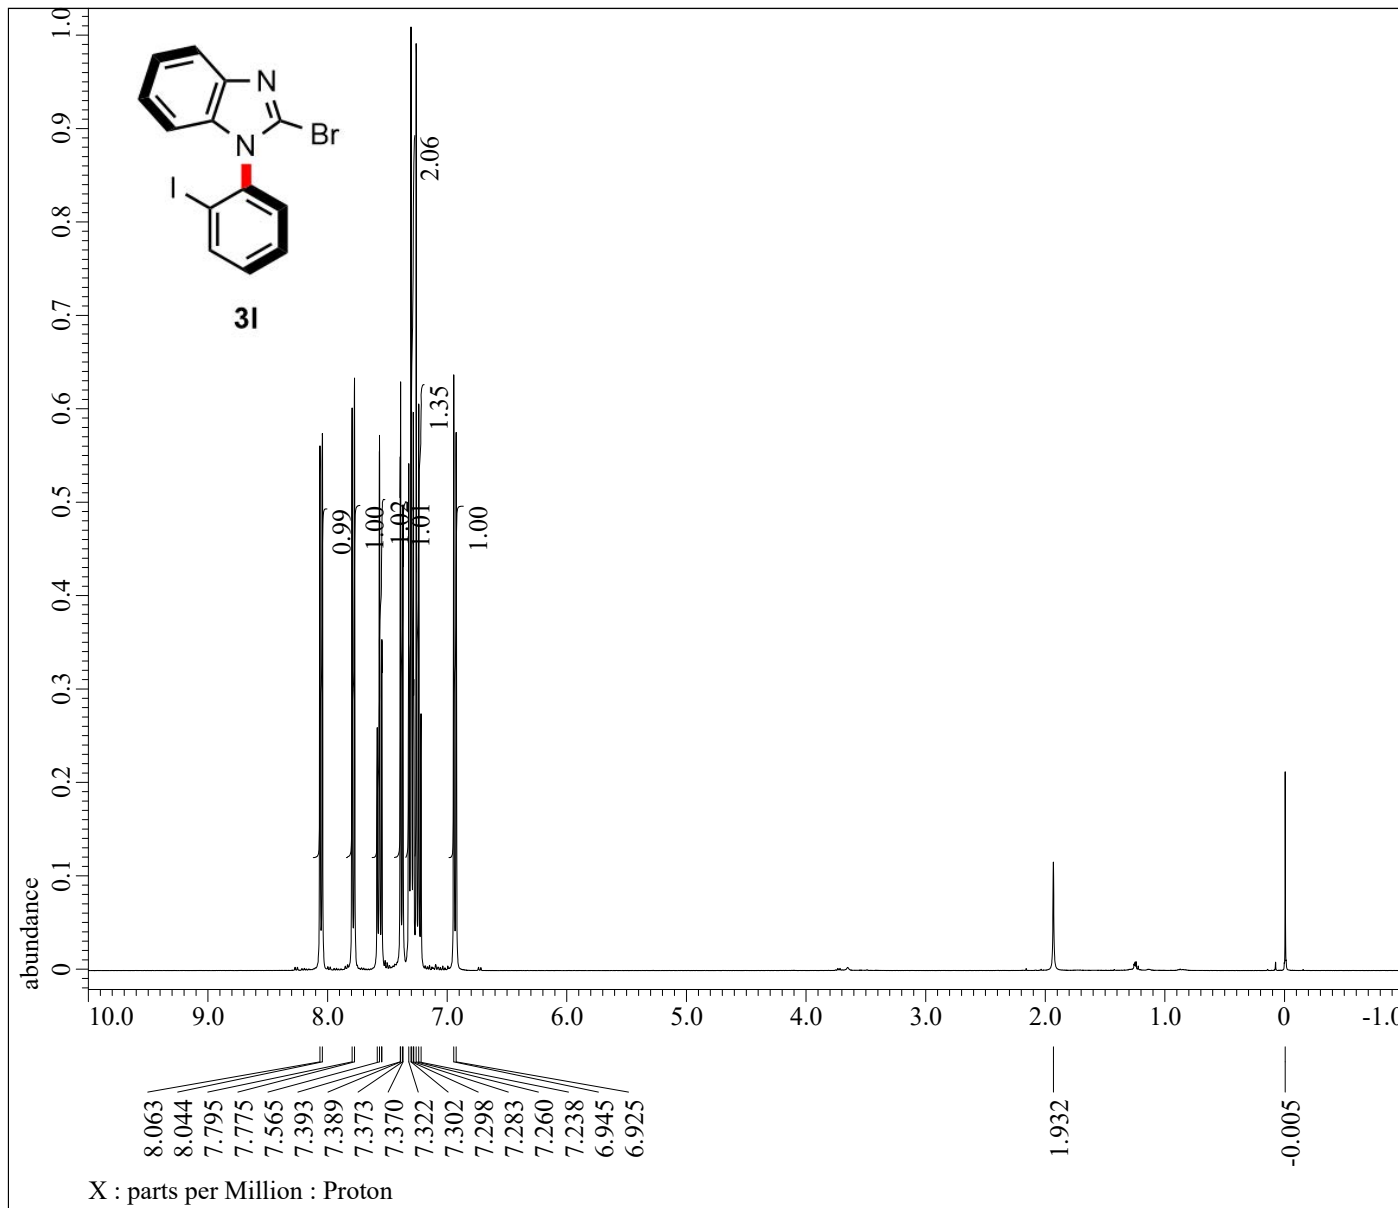

|                   |                      |
|-------------------|----------------------|
| Filename          | = MI-4-113-chiral-be |
| Author            | = delta              |
| Experiment        | = proton_auto.jxp    |
| Sample Id         | = MI-4-113-chiral-be |
| Solvent           | = CHLOROFORM-D       |
| Actual_Start_Time | = 18-APR-2023 19:54: |
| Revision_Time     | = 13-OCT-2023 19:59: |
| Comment           | = MI-4-113-chiral-be |
| Data_Format       | = 1D COMPLEX         |
| Dim_Size          | = 13107              |
| Dim_Title         | = Proton             |
| Dim_Units         | = [ppm]              |
| Dimensions        | = X                  |
| Spectrometer      | = JNM-ECZ400S/L1     |
| Field_Strength    | = 9.389766[T] (400[M |
| X_Acq_Duration    | = 2.18628096[s]      |
| X_Domain          | = Proton             |
| X_Freq            | = 399.78219838[MHz]  |
| X_Offset          | = 5[ppm]             |
| X_Points          | = 16384              |
| X_Prescans        | = 1                  |
| X_Resolution      | = 0.45739775[Hz]     |
| X_Sweep           | = 7.4940048[kHz]     |
| X_Sweep_Clipped   | = 5.99520384[kHz]    |
| Irr_Domain        | = Proton             |
| Irr_Freq          | = 399.78219838[MHz]  |
| Irr_Offset        | = 5[ppm]             |
| Tri_Domain        | = Proton             |
| Tri_Freq          | = 399.78219838[MHz]  |
| Tri_Offset        | = 5[ppm]             |
| Blanking          | = 2[us]              |
| Clipped           | = FALSE              |
| Scans             | = 8                  |
| Total_Scans       | = 8                  |
| Relaxation_Delay  | = 5[s]               |
| Recvr_Gain        | = 46                 |
| Temp_Get          | = 17.5[dC]           |
| X_90_Width        | = 8[us]              |
| X_Acq_Time        | = 2.18628096[s]      |
| X_Angle           | = 45[deg]            |
| X_Atn             | = 6[dB]              |
| X_Pulse           | = 4[us]              |
| Irr_Mode          | = Off                |
| Tri_Mode          | = Off                |
| Dante_Loop        | = 500                |
| Dante_Presat      | = FALSE              |
| Decimation_Rate   | = 0                  |
| Experiment_Path   | = c:\Program Files\J |
| Initial_Wait      | = 1[s]               |
| Phase             | = {0, 90, 270, 180,  |

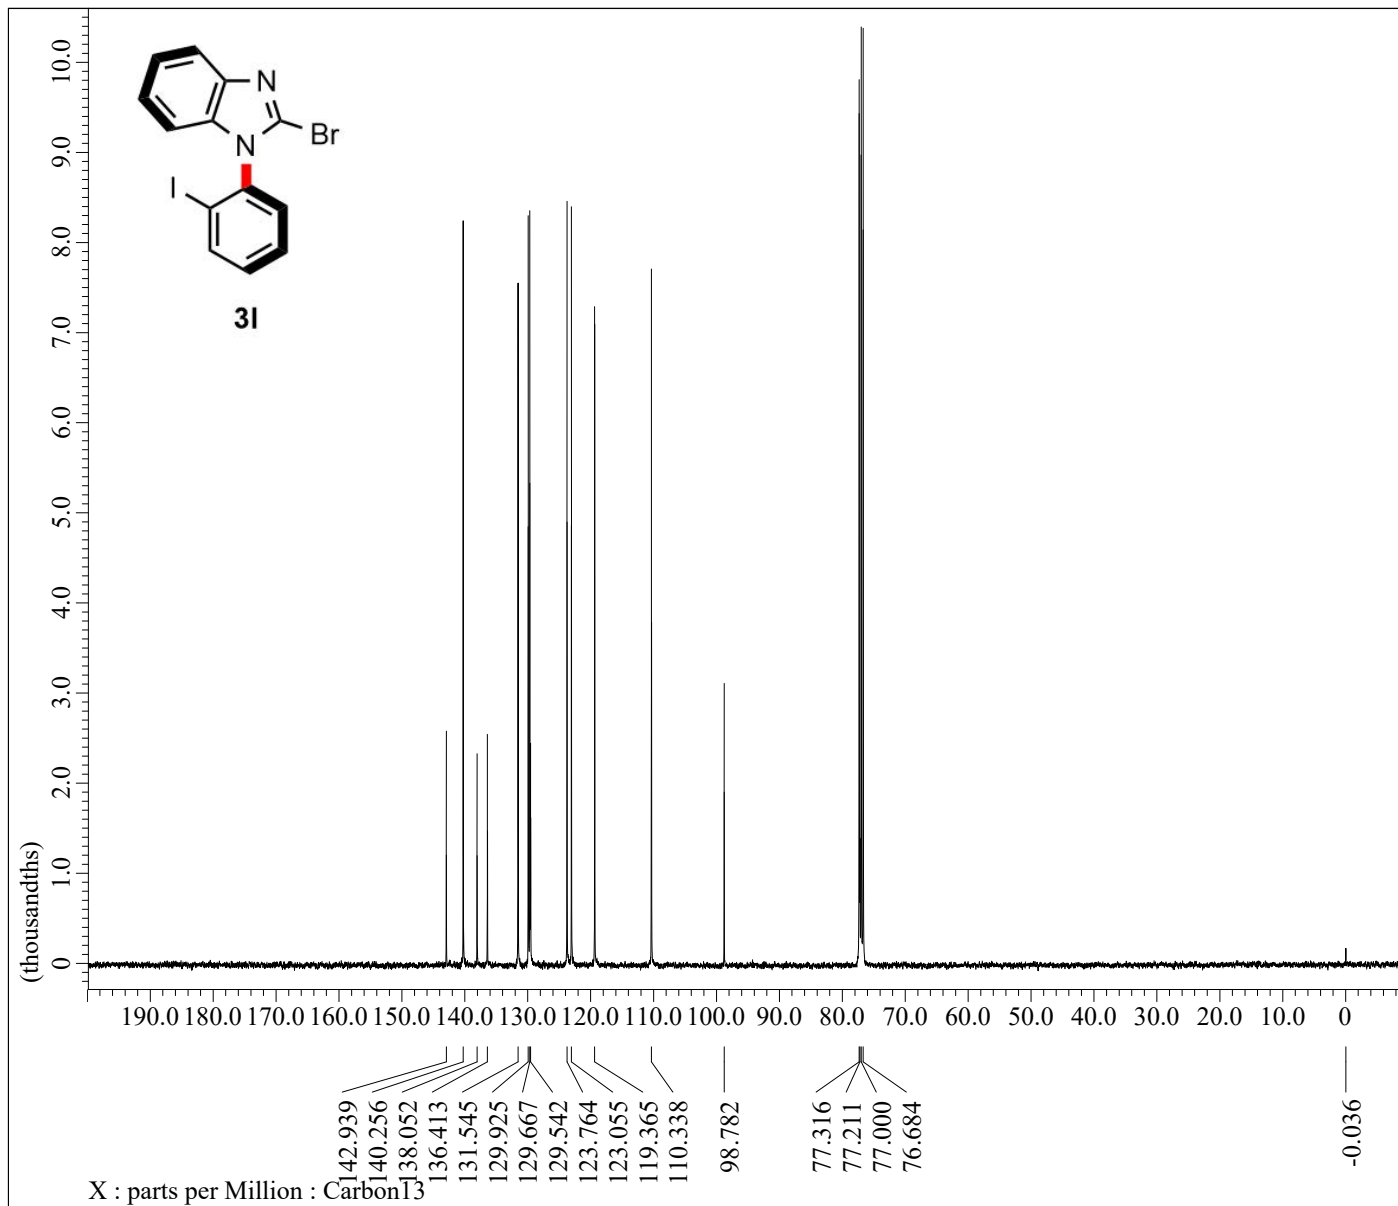

|                          |                    |
|--------------------------|--------------------|
| Filename                 | = MI-4-113-chiral  |
| Author                   | = delta            |
| Experiment               | = carbon_auto.jpg  |
| Sample Id                | = MI-4-113-chiral  |
| Solvent                  | = CHLOROFORM-D     |
| Actual_Start_Time        | = 19-APR-2023 03:  |
| Revision_Time            | = 14-OCT-2023 03:  |
| Comment                  | = MI-4-113-chiral  |
| Data_Format              | = 1D COMPLEX       |
| Dim_Size                 | = 26214            |
| Dim_Title                | = Carbon13         |
| Dim_Units                | = [ppm]            |
| Dimensions               | = X                |
| Spectrometer             | = JNM-ECZ400S/L1   |
| Field_Strength           | = 9.389766[T] (40  |
| X_Acq_Duration           | = 1.03809024[s]    |
| X_Domain                 | = Carbon13         |
| X_Freq                   | = 100.52530333[MH  |
| X_Offset                 | = 100[ppm]         |
| X_Points                 | = 32768            |
| X_Prescans               | = 4                |
| X_Resolution             | = 0.96330739[Hz]   |
| X_Sweep                  | = 31.56565657[kHz  |
| X_Sweep_Clipped          | = 25.25252525[kHz  |
| Irr_Domain               | = Proton           |
| Irr_Freq                 | = 399.78219838[MH  |
| Irr_Offset               | = 5[ppm]           |
| Blanking                 | = 5[us]            |
| Clipped                  | = TRUE             |
| Scans                    | = 2400             |
| Total_Scans              | = 2400             |
| Relaxation_Delay         | = 2[s]             |
| Recvr_Gain               | = 50               |
| Temp_Get                 | = 17.5[dC]         |
| X_90_Width               | = 11.1[us]         |
| X_Acq_Time               | = 1.03809024[s]    |
| X_Angle                  | = 30[deg]          |
| X_Atn                    | = 8[dB]            |
| X_Pulse                  | = 3.7[us]          |
| Irr_Atn_Dec              | = 29.152[dB]       |
| Irr_Atn_Dec_Calc         | = 29.152[dB]       |
| Irr_Atn_Dec_Default_Calc | = 29.152[dB]       |
| Irr_Atn_Noie             | = 29.152[dB]       |
| Irr_Dec_Bandwidth_Hz     | = 4.7826087[kHz]   |
| Irr_Dec_Bandwidth_Ppm    | = 11.96303566[ppm] |
| Irr_Dec_Freq             | = 399.78219838[MH  |
| Irr_Dec_Merit_Factor     | = 2.2              |
| Irr_Decoupling           | = TRUE             |
| Irr_Noie                 | = TRUE             |
| Irr_Noise                | = WALTZ            |

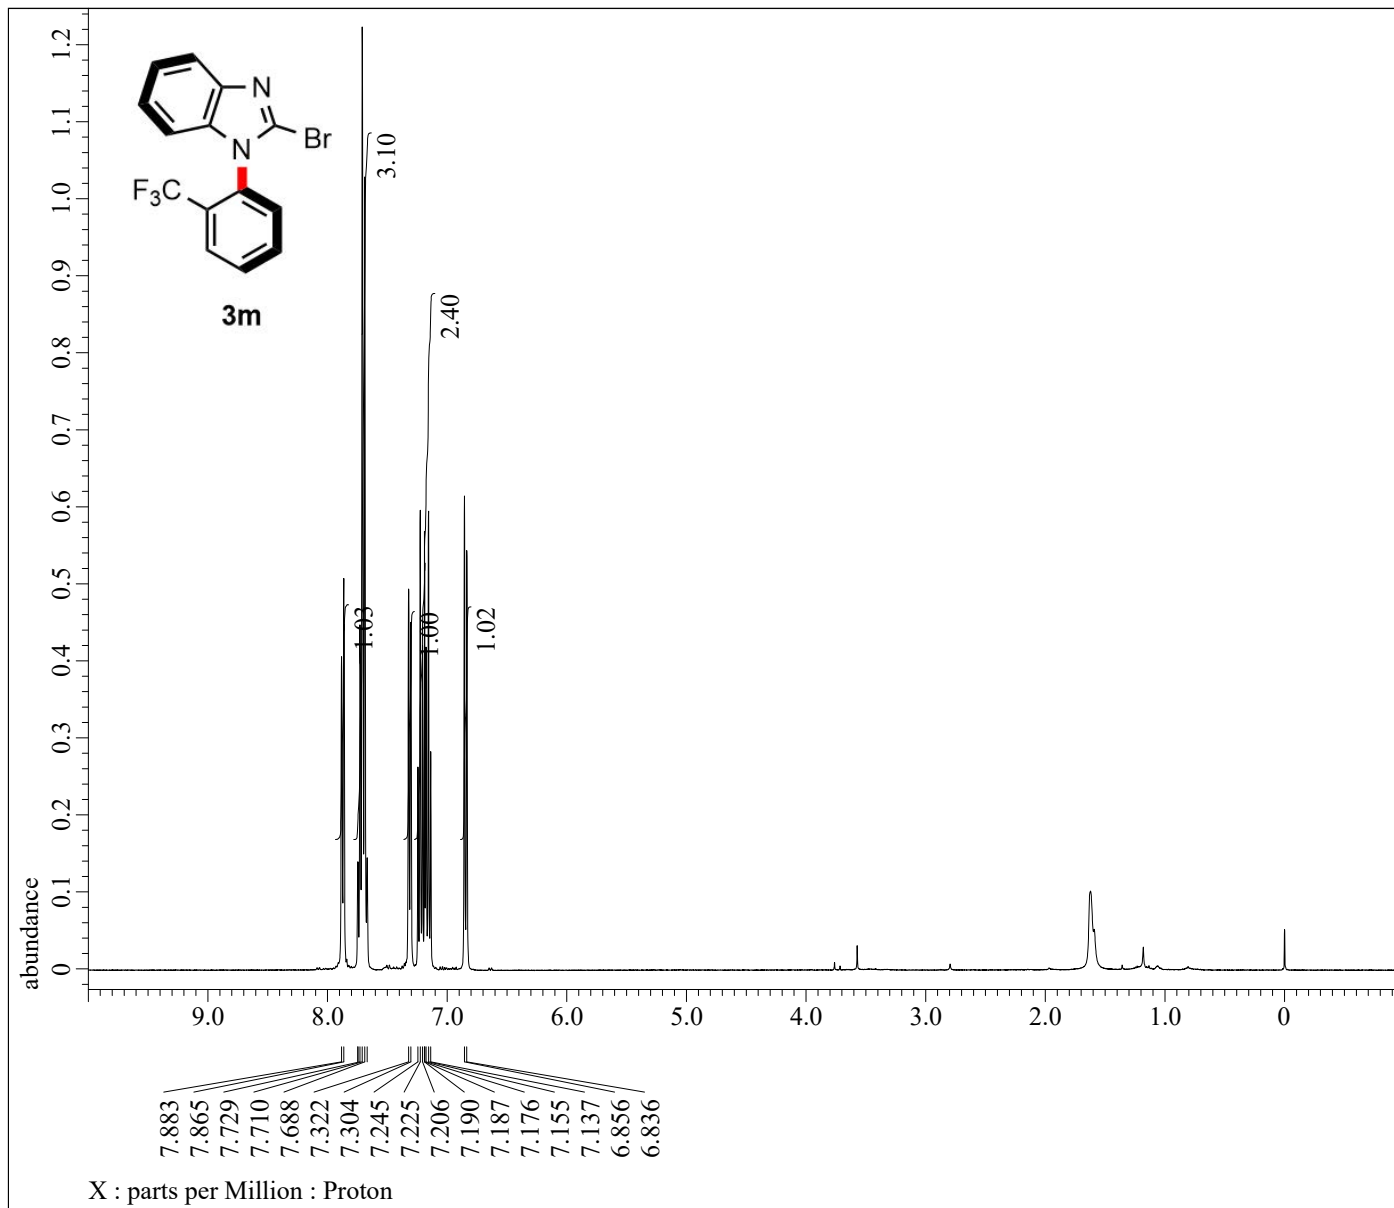

|                   |                      |
|-------------------|----------------------|
| Filename          | = MI-5-3-chiral-Benz |
| Author            | = delta              |
| Experiment        | = proton_auto.jpg    |
| Sample Id         | = MI-5-3-chiral-Benz |
| Solvent           | = CHLOROFORM-D       |
| Actual_Start_Time | = 5-SEP-2023 08:51:  |
| Revision_Time     | = 13-OCT-2023 20:07: |
| Comment           | = MI-5-3-chiral-Benz |
| Data_Format       | = 1D COMPLEX         |
| Dim_Size          | = 13107              |
| Dim_Title         | = Proton             |
| Dim_Units         | = [ppm]              |
| Dimensions        | = X                  |
| Spectrometer      | = JNM-ECZ400S/L1     |
| Field_Strength    | = 9.389766[T] (400[M |
| X_Acq_Duration    | = 2.18628096[s]      |
| X_Domain          | = Proton             |
| X_Freq            | = 399.78219838[MHz]  |
| X_Offset          | = 5[ppm]             |
| X_Points          | = 16384              |
| X_Prescans        | = 1                  |
| X_Resolution      | = 0.45739775[Hz]     |
| X_Sweep           | = 7.4940048[kHz]     |
| X_Sweep_Clipped   | = 5.99520384[kHz]    |
| Irr_Domain        | = Proton             |
| Irr_Freq          | = 399.78219838[MHz]  |
| Irr_Offset        | = 5[ppm]             |
| Tri_Domain        | = Proton             |
| Tri_Freq          | = 399.78219838[MHz]  |
| Tri_Offset        | = 5[ppm]             |
| Blanking          | = 2[us]              |
| Clipped           | = FALSE              |
| Scans             | = 8                  |
| Total_Scans       | = 8                  |
| Relaxation_Delay  | = 5[s]               |
| Recvr_Gain        | = 56                 |
| Temp_Get          | = 21.1[dC]           |
| X_90_Width        | = 8[us]              |
| X_Acq_Time        | = 2.18628096[s]      |
| X_Angle           | = 45[deg]            |
| X_Atn             | = 6[dB]              |
| X_Pulse           | = 4[us]              |
| Irr_Mode          | = Off                |
| Tri_Mode          | = Off                |
| Dante_Loop        | = 500                |
| Dante_Presat      | = FALSE              |
| Decimation_Rate   | = 0                  |
| Experiment_Path   | = c:\Program Files\J |
| Initial_Wait      | = 1[s]               |
| Phase             | = {0, 90, 270, 180,  |

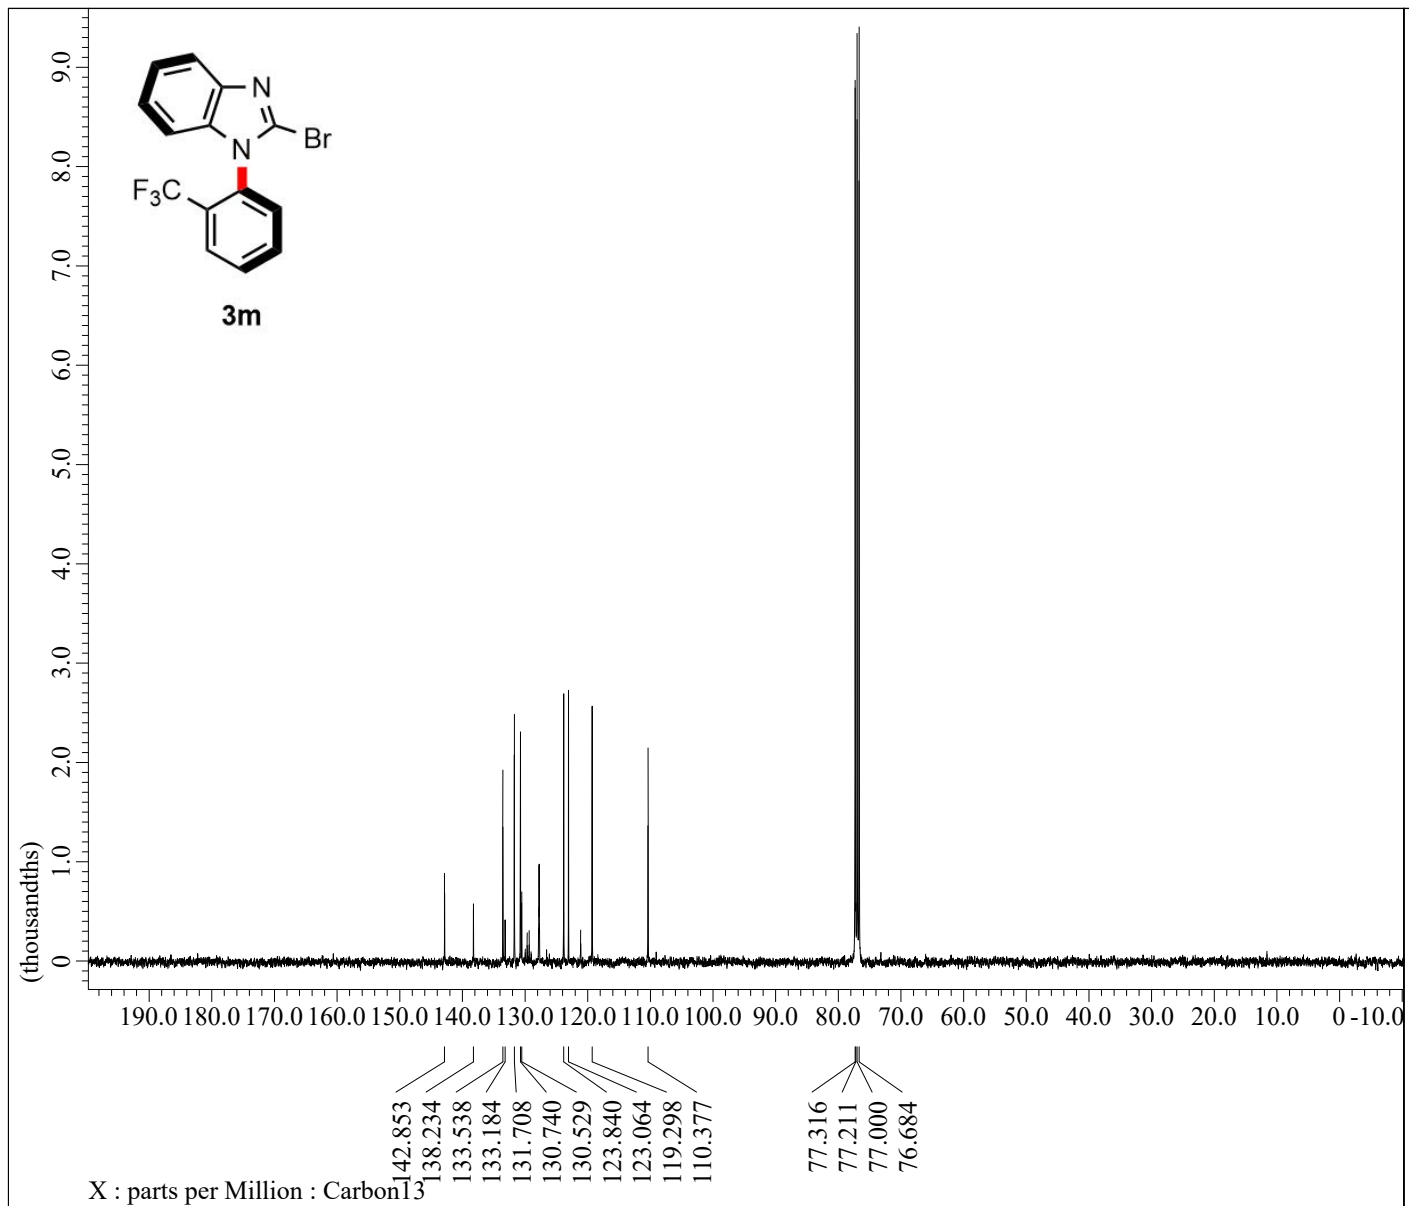

```

Filename           = MI-5-3-chiral-E
Author             = delta
Experiment         = carbon_auto.jpg
Sample_Id          = MI-5-3-chiral-E
Solvent            = CHLOROFORM-D
Actual_Start_Time  = 4-SEP-2023 22:
Revision_Time      = 14-OCT-2023 04:

Comment           = MI-5-3-chiral-E
Data_Format       = 1D COMPLEX
Dim_Size          = 26214
Dim_Title         = Carbon13
Dim_Units         = [ppm]
Dimensions        = X
Spectrometer      = JNM-ECZ400S/L1

Field_Strength    = 9.389766[T] (40
X_Acq_Duration    = 1.03809024[s]
X_Domain          = Carbon13
X_Freq            = 100.52530333[MH
X_Offset          = 100[ppm]
X_Points          = 32768
X_Prescans        = 4
X_Resolution      = 0.96330739[Hz]
X_Sweep           = 31.56565657[kHz]
X_Sweep_Clipped   = 25.25252525[kHz]
Irr_Domain        = Proton
Irr_Freq          = 399.78219838[MH
Irr_Offset        = 5[ppm]
Blanking          = 5[us]
Clipped           = TRUE
Scans             = 1024
Total_Scans       = 1024

Relaxation_Delay  = 2[s]
Recvr_Gain        = 50
Temp_Get          = 22.2[dC]
X_90_Width        = 11.1[us]
X_Acq_Time        = 1.03809024[s]
X_Angle           = 30[deg]
X_Atn             = 8[dB]
X_Pulse           = 3.7[us]
Irr_Atn_Dec       = 29.152[dB]
Irr_Atn_Dec_Calc  = 29.152[dB]
Irr_Atn_Dec_Default_Calc = 29.152[dB]
Irr_Atn_Noise    = 29.152[dB]
Irr_Dec_Bandwidth_Hz = 4.7826087[kHz]
Irr_Dec_Bandwidth_Ppm = 11.96303566[ppm]
Irr_Dec_Freq      = 399.78219838[MH
Irr_Dec_Merit_Factor = 2.2
Irr_Decoupling    = TRUE
Irr_Noise         = TRUE
Irr_Noise         = WALTZ

```

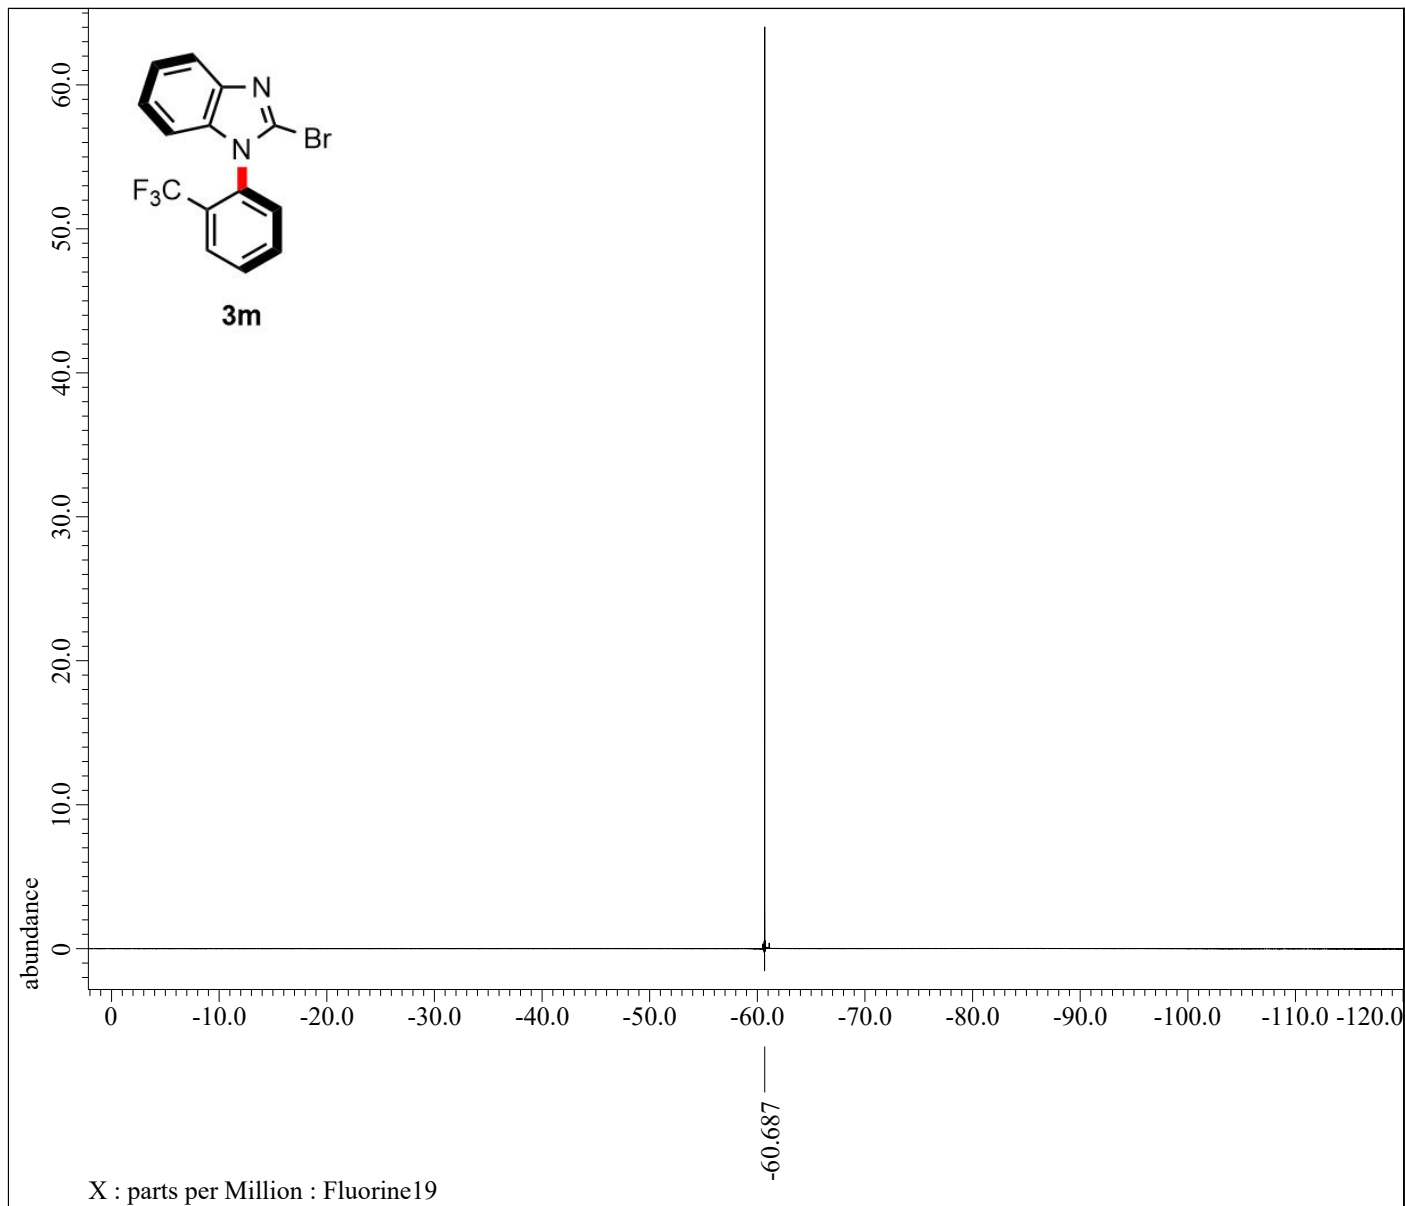

|                   |                      |
|-------------------|----------------------|
| Filename          | = MI-5-34-BenzImi-Br |
| Author            | = delta              |
| Experiment        | = single_pulse.jxp   |
| Sample Id         | = MI-5-34-BenzImi-Br |
| Solvent           | = CHLOROFORM-D       |
| Actual_Start_Time | = 18-OCT-2023 15:46: |
| Revision_Time     | = 18-OCT-2023 15:50: |
| Comment           | = MI-5-34-BenzImi-Br |
| Data_Format       | = 1D COMPLEX         |
| Dim_Size          | = 26214              |
| Dim_Title         | = Fluorine19         |
| Dim_Units         | = [ppm]              |
| Dimensions        | = X                  |
| Site              | = ECA 500            |
| Spectrometer      | = DELTA2_NMR         |
| Field_Strength    | = 11.7473579[T] (500 |
| X_Acq_Duration    | = 0.27262976[s]      |
| X_Domain          | = 19F                |
| X_Freq            | = 470.62046084[MHz]  |
| X_Offset          | = -100[ppm]          |
| X_Points          | = 32768              |
| X_Prescans        | = 1                  |
| X_Resolution      | = 3.66797814[Hz]     |
| X_Sweep           | = 120.19230769[kHz]  |
| X_Sweep_Clipped   | = 96.15384615[kHz]   |
| Irr_Domain        | = Fluorine19         |
| Irr_Freq          | = 470.62046084[MHz]  |
| Irr_Offset        | = 5[ppm]             |
| Tri_Domain        | = Fluorine19         |
| Tri_Freq          | = 470.62046084[MHz]  |
| Tri_Offset        | = 5[ppm]             |
| Clipped           | = FALSE              |
| Scans             | = 32                 |
| Total_Scans       | = 32                 |
| Relaxation_Delay  | = 5[s]               |
| Recvr_Gain        | = 50                 |
| Temp_Get          | = 19.9[dC]           |
| X_90_Width        | = 13.6[us]           |
| X_Acq_Time        | = 0.27262976[s]      |
| X_Angle           | = 45[deg]            |
| X_Atn             | = 2.5[dB]            |
| X_Pulse           | = 6.8[us]            |
| Irr_Mode          | = Off                |
| Tri_Mode          | = Off                |
| Dante_Loop        | = 500                |
| Dante_Presat      | = FALSE              |
| Decimation_Rate   | = 0                  |
| Force_Dual_Mode   | = FALSE              |
| Initial_Wait      | = 1[s]               |
| Presat_Time       | = 5[s]               |

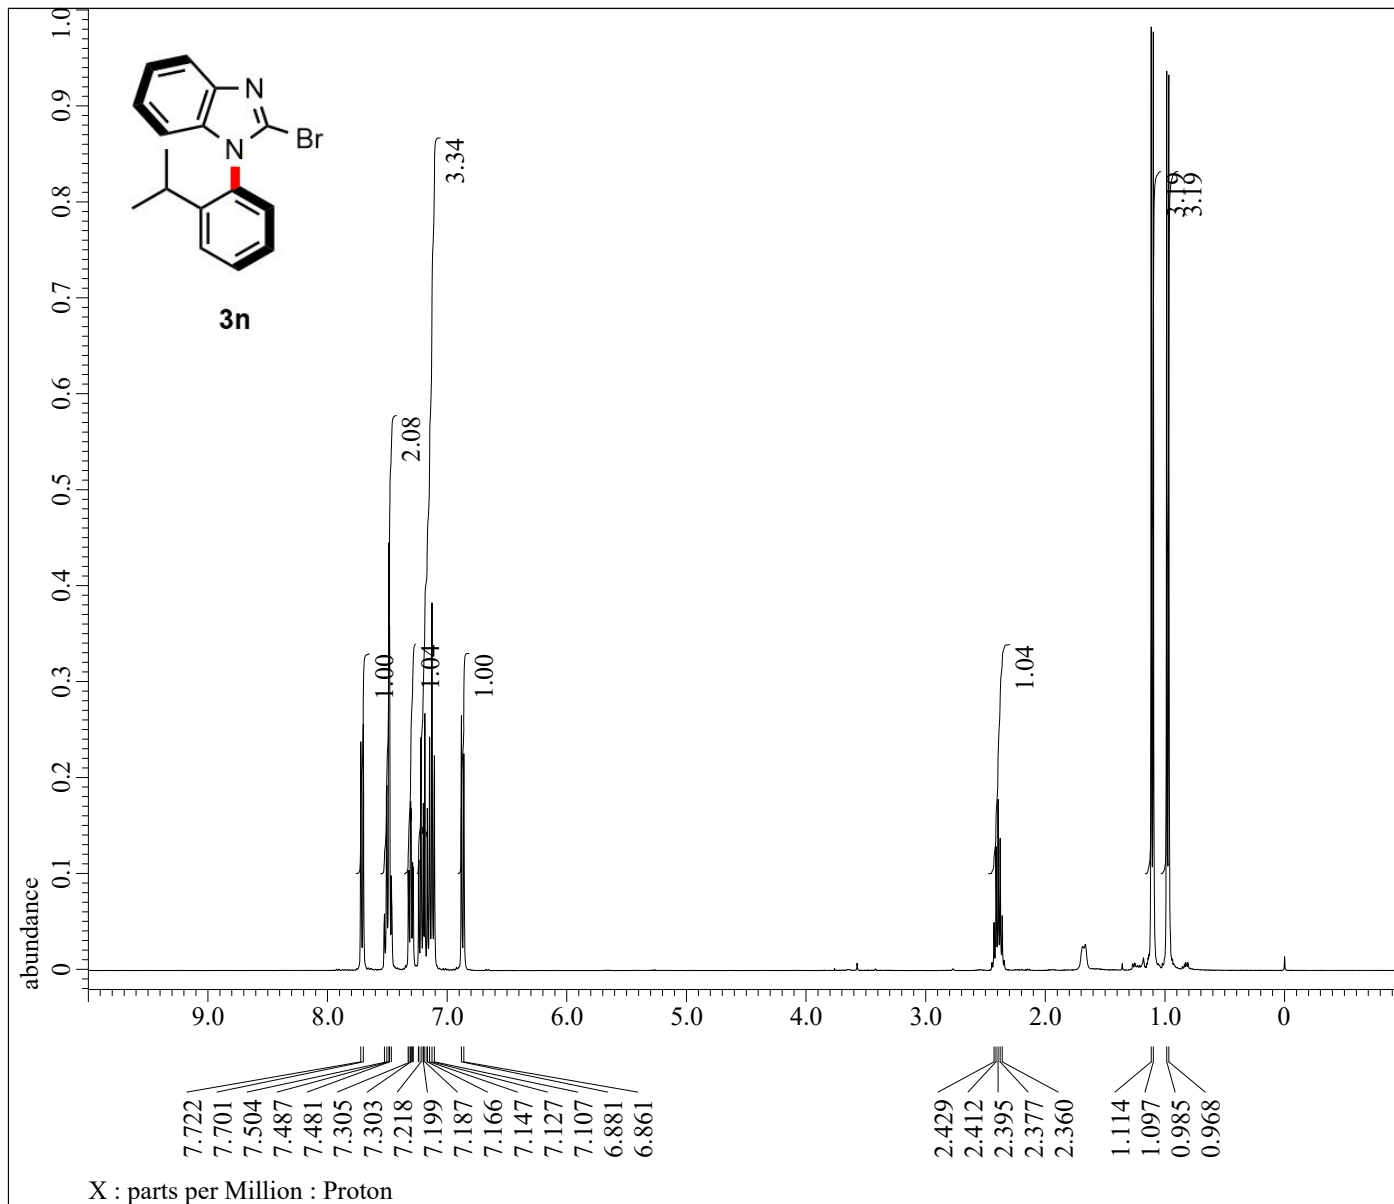

|                   |                      |
|-------------------|----------------------|
| Filename          | = MI-5-28-chiral-Ber |
| Author            | = delta              |
| Experiment        | = proton_auto.jxp    |
| Sample Id         | = MI-5-28-chiral-Ber |
| Solvent           | = CHLOROFORM-D       |
| Actual_Start_Time | = 5-SEP-2023 09:00:  |
| Revision_Time     | = 13-OCT-2023 20:21: |
| Comment           | = MI-5-28-chiral-Ber |
| Data_Format       | = 1D COMPLEX         |
| Dim_Size          | = 13107              |
| Dim_Title         | = Proton             |
| Dim_Units         | = [ppm]              |
| Dimensions        | = X                  |
| Spectrometer      | = JNM-ECZ400S/L1     |
| Field_Strength    | = 9.389766[T] (400[M |
| X_Acq_Duration    | = 2.18628096[s]      |
| X_Domain          | = Proton             |
| X_Freq            | = 399.78219838[MHz]  |
| X_Offset          | = 5[ppm]             |
| X_Points          | = 16384              |
| X_Prescans        | = 1                  |
| X_Resolution      | = 0.45739775[Hz]     |
| X_Sweep           | = 7.4940048[kHz]     |
| X_Sweep_Clipped   | = 5.99520384[kHz]    |
| Irr_Domain        | = Proton             |
| Irr_Freq          | = 399.78219838[MHz]  |
| Irr_Offset        | = 5[ppm]             |
| Tri_Domain        | = Proton             |
| Tri_Freq          | = 399.78219838[MHz]  |
| Tri_Offset        | = 5[ppm]             |
| Blanking          | = 2[us]              |
| Clipped           | = FALSE              |
| Scans             | = 8                  |
| Total_Scans       | = 8                  |
| Relaxation_Delay  | = 5[s]               |
| Recvr_Gain        | = 46                 |
| Temp_Get          | = 21.3[dC]           |
| X_90_Width        | = 8[us]              |
| X_Acq_Time        | = 2.18628096[s]      |
| X_Angle           | = 45[deg]            |
| X_Atn             | = 6[dB]              |
| X_Pulse           | = 4[us]              |
| Irr_Mode          | = Off                |
| Tri_Mode          | = Off                |
| Dante_Loop        | = 500                |
| Dante_Presat      | = FALSE              |
| Decimation_Rate   | = 0                  |
| Experiment_Path   | = c:\Program Files\J |
| Initial_Wait      | = 1[s]               |
| Phase             | = {0, 90, 270, 180,  |

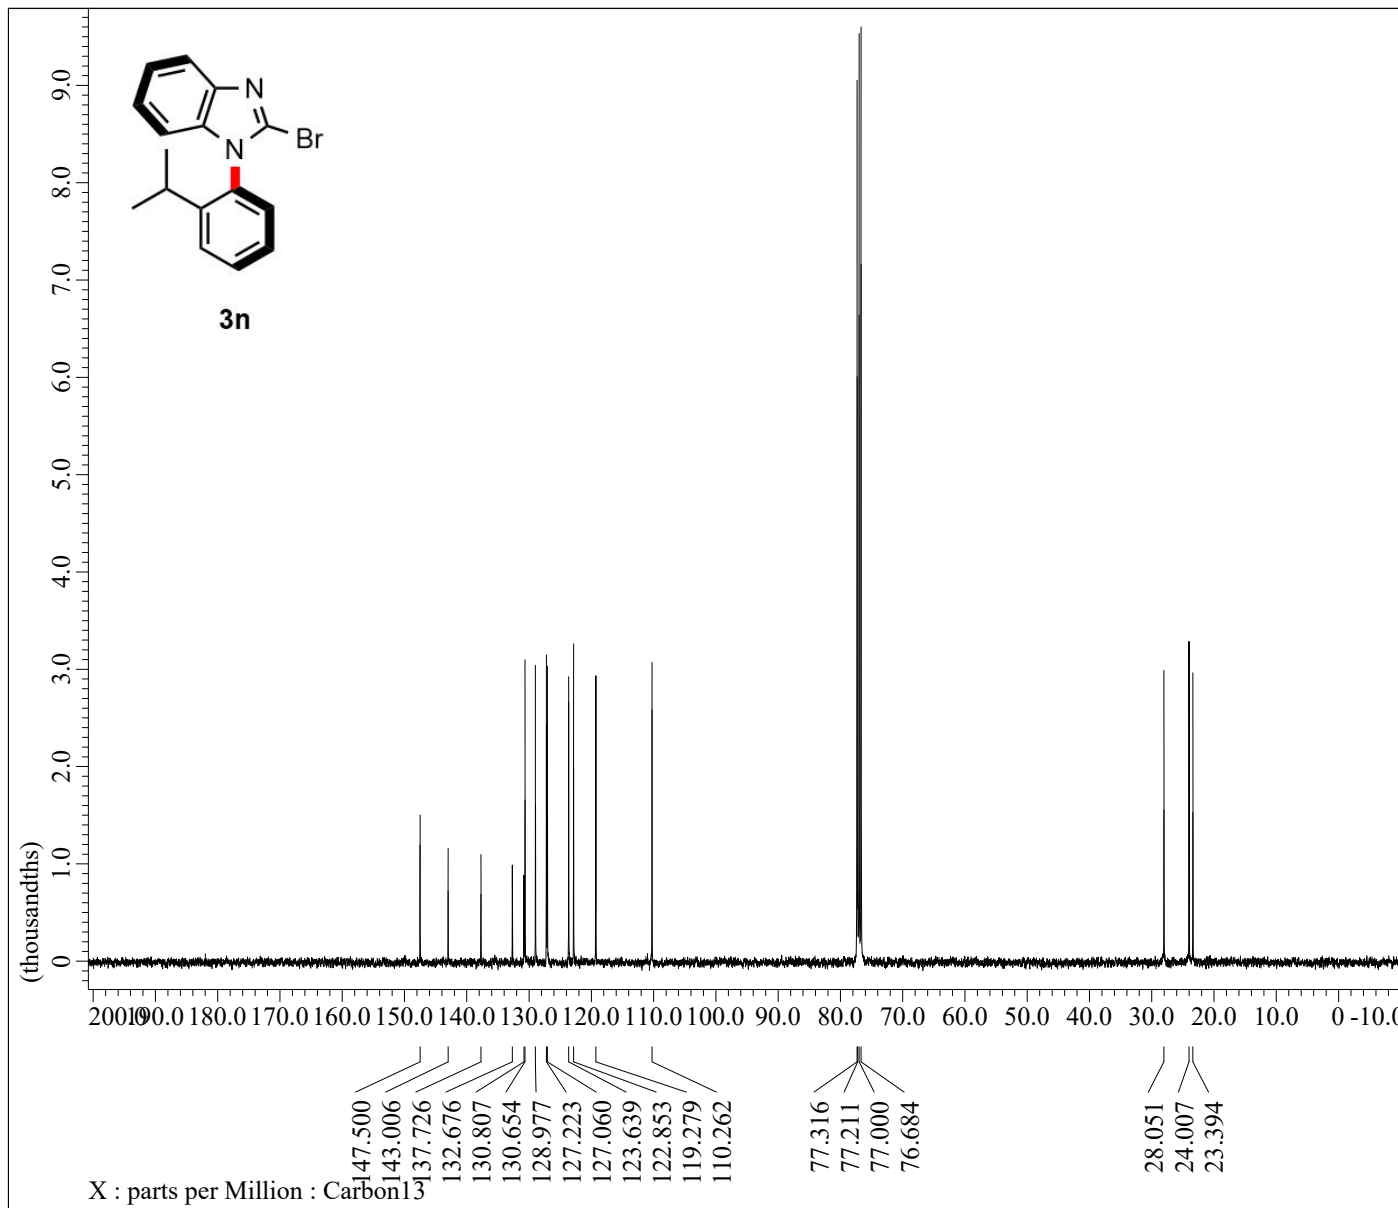

|                          |                   |
|--------------------------|-------------------|
| Filename                 | = MI-5-28-chiral- |
| Author                   | = delta           |
| Experiment               | = carbon_auto.jpg |
| Sample Id                | = MI-5-28-chiral- |
| Solvent                  | = CHLOROFORM-D    |
| Actual_Start_Time        | = 5-SEP-2023 00:  |
| Revision_Time            | = 14-OCT-2023 04: |
| Comment                  | = MI-5-28-chiral- |
| Data_Format              | = 1D COMPLEX      |
| Dim_Size                 | = 26214           |
| Dim_Title                | = Carbon13        |
| Dim_Units                | = [ppm]           |
| Dimensions               | = X               |
| Spectrometer             | = JNM-ECZ400S/L1  |
| Field_Strength           | = 9.389766[T] (40 |
| X_Acq_Duration           | = 1.03809024[s]   |
| X_Domain                 | = Carbon13        |
| X_Freq                   | = 100.52530333[MH |
| X_Offset                 | = 100[ppm]        |
| X_Points                 | = 32768           |
| X_Prescans               | = 4               |
| X_Resolution             | = 0.96330739[Hz]  |
| X_Sweep                  | = 31.56565657[kHz |
| X_Sweep_Clipped          | = 25.25252525[kHz |
| Irr_Domain               | = Proton          |
| Irr_Freq                 | = 399.78219838[MH |
| Irr_Offset               | = 5[ppm]          |
| Blanking                 | = 5[us]           |
| Clipped                  | = TRUE            |
| Scans                    | = 1024            |
| Total_Scans              | = 1024            |
| Relaxation_Delay         | = 2[s]            |
| Recvr_Gain               | = 50              |
| Temp_Get                 | = 21.9[dC]        |
| X_90_Width               | = 11.1[us]        |
| X_Acq_Time               | = 1.03809024[s]   |
| X_Angle                  | = 30[deg]         |
| X_Atn                    | = 8[dB]           |
| X_Pulse                  | = 3.7[us]         |
| Irr_Atn_Dec              | = 29.152[dB]      |
| Irr_Atn_Dec_Calc         | = 29.152[dB]      |
| Irr_Atn_Dec_Default_Calc | = 29.152[dB]      |
| Irr_Atn_No               | = 29.152[dB]      |
| Irr_Dec_Bandwidth_Hz     | = 4.7826087[kHz]  |
| Irr_Dec_Bandwidth_Ppm    | = 11.96303566[ppm |
| Irr_Dec_Freq             | = 399.78219838[MH |
| Irr_Dec_Merit_Factor     | = 2.2             |
| Irr_Decoupling           | = TRUE            |
| Irr_No                   | = TRUE            |
| Irr_Noise                | = WALTZ           |

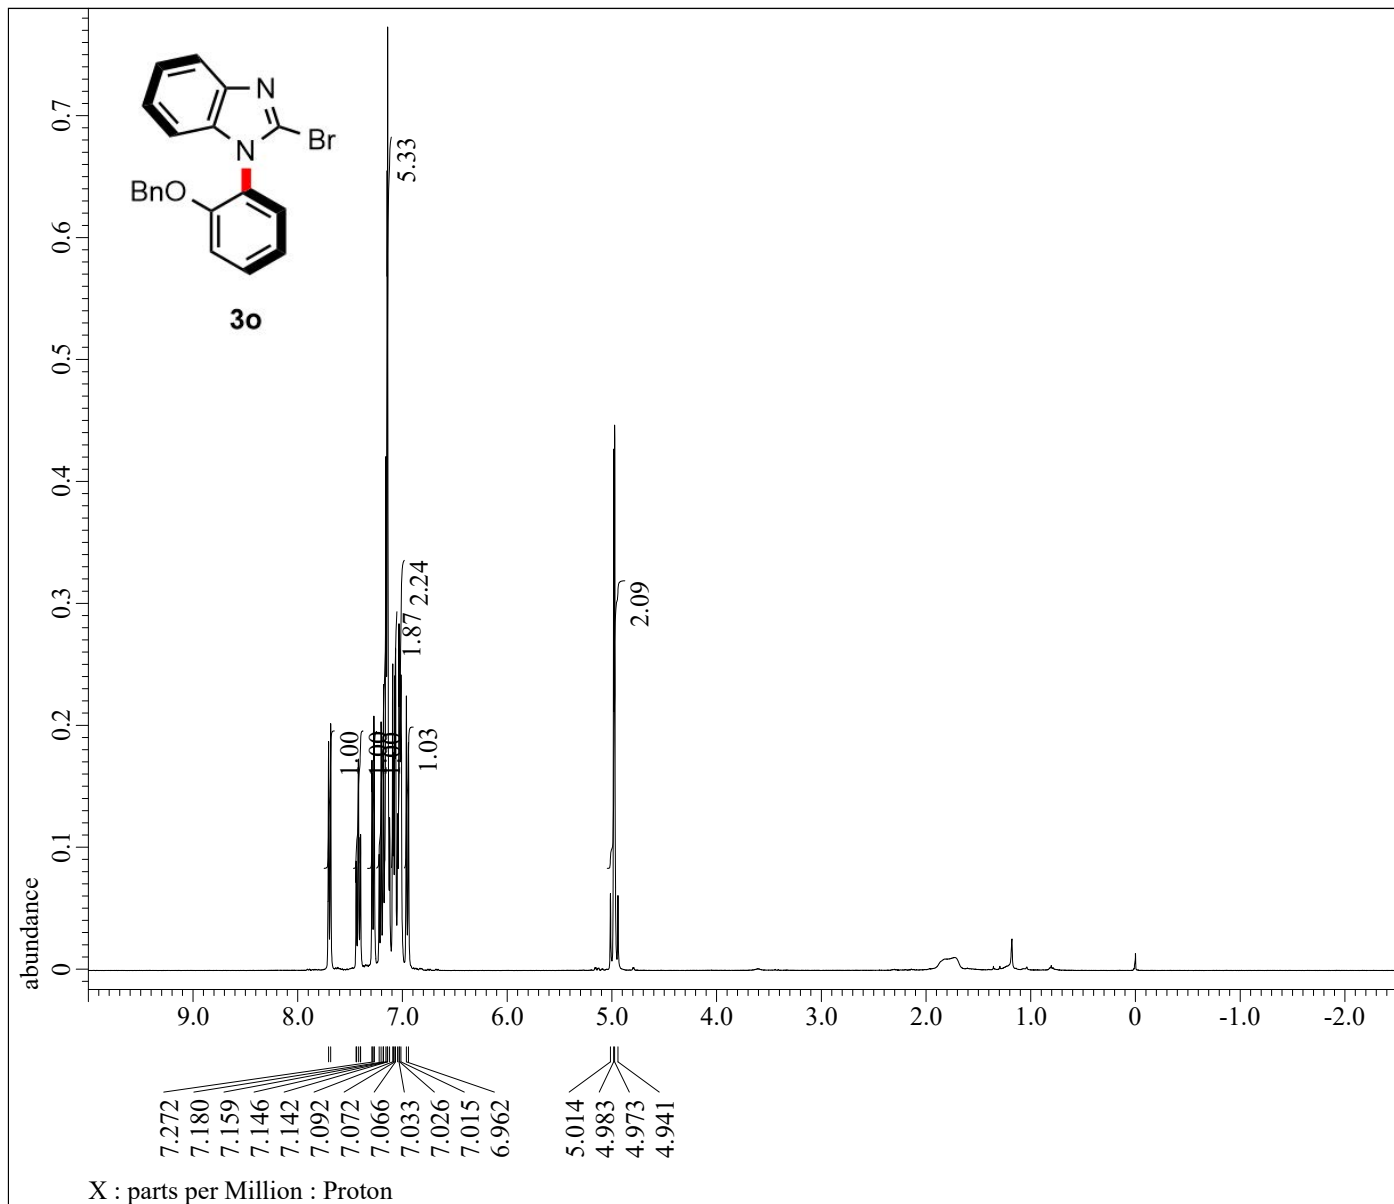

|                   |                      |
|-------------------|----------------------|
| Filename          | = MI-4-116-chiral-Be |
| Author            | = delta              |
| Experiment        | = proton_auto.jxp    |
| Sample Id         | = MI-4-116-chiral-Be |
| Solvent           | = CHLOROFORM-D       |
| Actual_Start_Time | = 5-SEP-2023 09:08:  |
| Revision_Time     | = 13-OCT-2023 20:49: |
| Comment           | = MI-4-116-chiral-Be |
| Data_Format       | = 1D COMPLEX         |
| Dim_Size          | = 13107              |
| Dim_Title         | = Proton             |
| Dim_Units         | = [ppm]              |
| Dimensions        | = X                  |
| Spectrometer      | = JNM-ECZ400S/L1     |
| Field_Strength    | = 9.389766[T] (400[M |
| X_Acq_Duration    | = 2.18628096[s]      |
| X_Domain          | = Proton             |
| X_Freq            | = 399.78219838[MHz]  |
| X_Offset          | = 5[ppm]             |
| X_Points          | = 16384              |
| X_Prescans        | = 1                  |
| X_Resolution      | = 0.45739775[Hz]     |
| X_Sweep           | = 7.4940048[kHz]     |
| X_Sweep_Clipped   | = 5.99520384[kHz]    |
| Irr_Domain        | = Proton             |
| Irr_Freq          | = 399.78219838[MHz]  |
| Irr_Offset        | = 5[ppm]             |
| Tri_Domain        | = Proton             |
| Tri_Freq          | = 399.78219838[MHz]  |
| Tri_Offset        | = 5[ppm]             |
| Blanking          | = 2[us]              |
| Clipped           | = FALSE              |
| Scans             | = 8                  |
| Total_Scans       | = 8                  |
| Relaxation_Delay  | = 5[s]               |
| Recvr_Gain        | = 46                 |
| Temp_Get          | = 21.4[dC]           |
| X_90_Width        | = 8[us]              |
| X_Acq_Time        | = 2.18628096[s]      |
| X_Angle           | = 45[deg]            |
| X_Atn             | = 6[dB]              |
| X_Pulse           | = 4[us]              |
| Irr_Mode          | = Off                |
| Tri_Mode          | = Off                |
| Dante_Loop        | = 500                |
| Dante_Presat      | = FALSE              |
| Decimation_Rate   | = 0                  |
| Experiment_Path   | = c:\Program Files\J |
| Initial_Wait      | = 1[s]               |
| Phase             | = {0, 90, 270, 180,  |



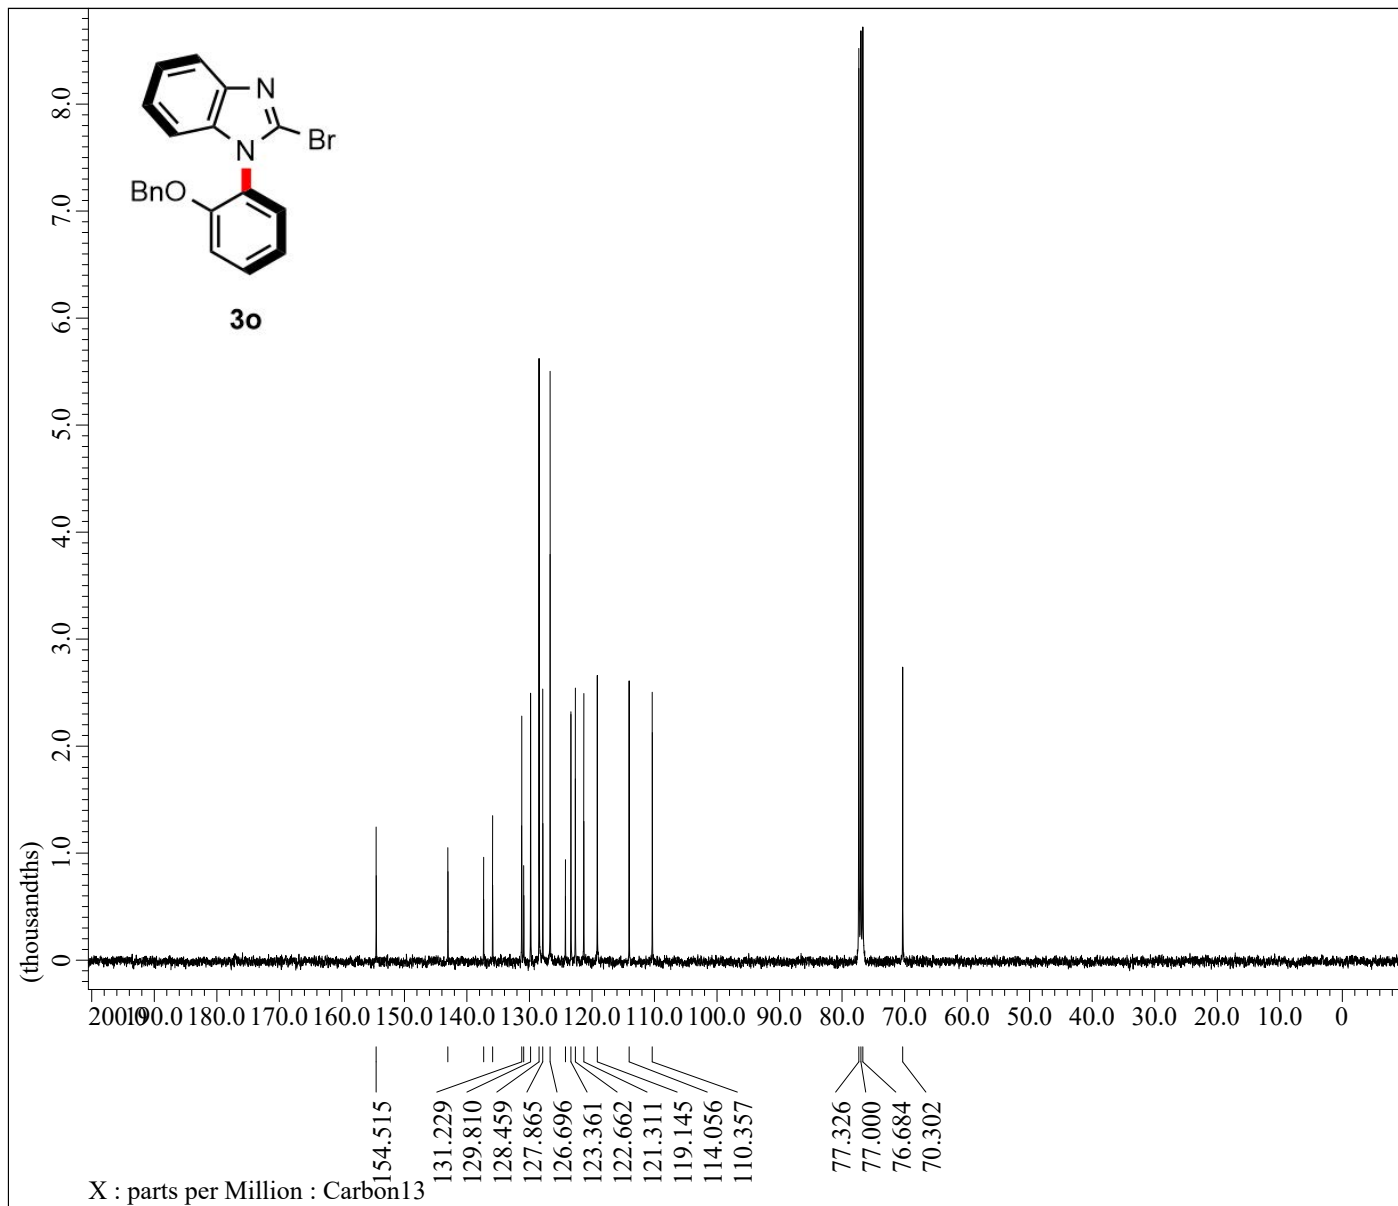

```

Filename           = MI-4-116-chiral
Author             = delta
Experiment         = carbon_auto.jpg
Sample Id          = MI-4-116-chiral
Solvent            = CHLOROFORM-D
Actual_Start_Time  = 5-SEP-2023 02:
Revision_Time      = 14-OCT-2023 04:

Comment           = MI-4-116-chiral
Data_Format       = 1D COMPLEX
Dim_Size          = 26214
Dim_Title         = Carbon13
Dim_Units         = [ppm]
Dimensions        = X
Spectrometer      = JNM-ECZ400S/L1

Field_Strength    = 9.389766[T] (40
X_Acq_Duration    = 1.03809024[s]
X_Domain          = Carbon13
X_Freq            = 100.52530333[MH
X_Offset          = 100[ppm]
X_Points          = 32768
X_Prescans        = 4
X_Resolution      = 0.96330739[Hz]
X_Sweep           = 31.56565657[kHz]
X_Sweep_Clipped  = 25.25252525[kHz]
Irr_Domain        = Proton
Irr_Freq          = 399.78219838[MH
Irr_Offset        = 5[ppm]
Blanking          = 5[us]
Clipped           = TRUE
Scans             = 1024
Total_Scans       = 1024

Relaxation_Delay  = 2[s]
Recvr_Gain        = 50
Temp_Get          = 21.8[dC]
X_90_Width        = 11.1[us]
X_Acq_Time        = 1.03809024[s]
X_Angle           = 30[deg]
X_Atn             = 8[dB]
X_Pulse           = 3.7[us]
Irr_Atn_Dec       = 29.152[dB]
Irr_Atn_Dec_Calc = 29.152[dB]
Irr_Atn_Dec_Default_Calc = 29.152[dB]
Irr_Atn_Noise    = 29.152[dB]
Irr_Dec_Bandwidth_Hz = 4.7826087[kHz]
Irr_Dec_Bandwidth_Ppm = 11.96303566[ppm]
Irr_Dec_Freq      = 399.78219838[MH
Irr_Dec_Merit_Factor = 2.2
Irr_Decoupling    = TRUE
Irr_Noise         = TRUE
Irr_Noise         = WALTZ

```

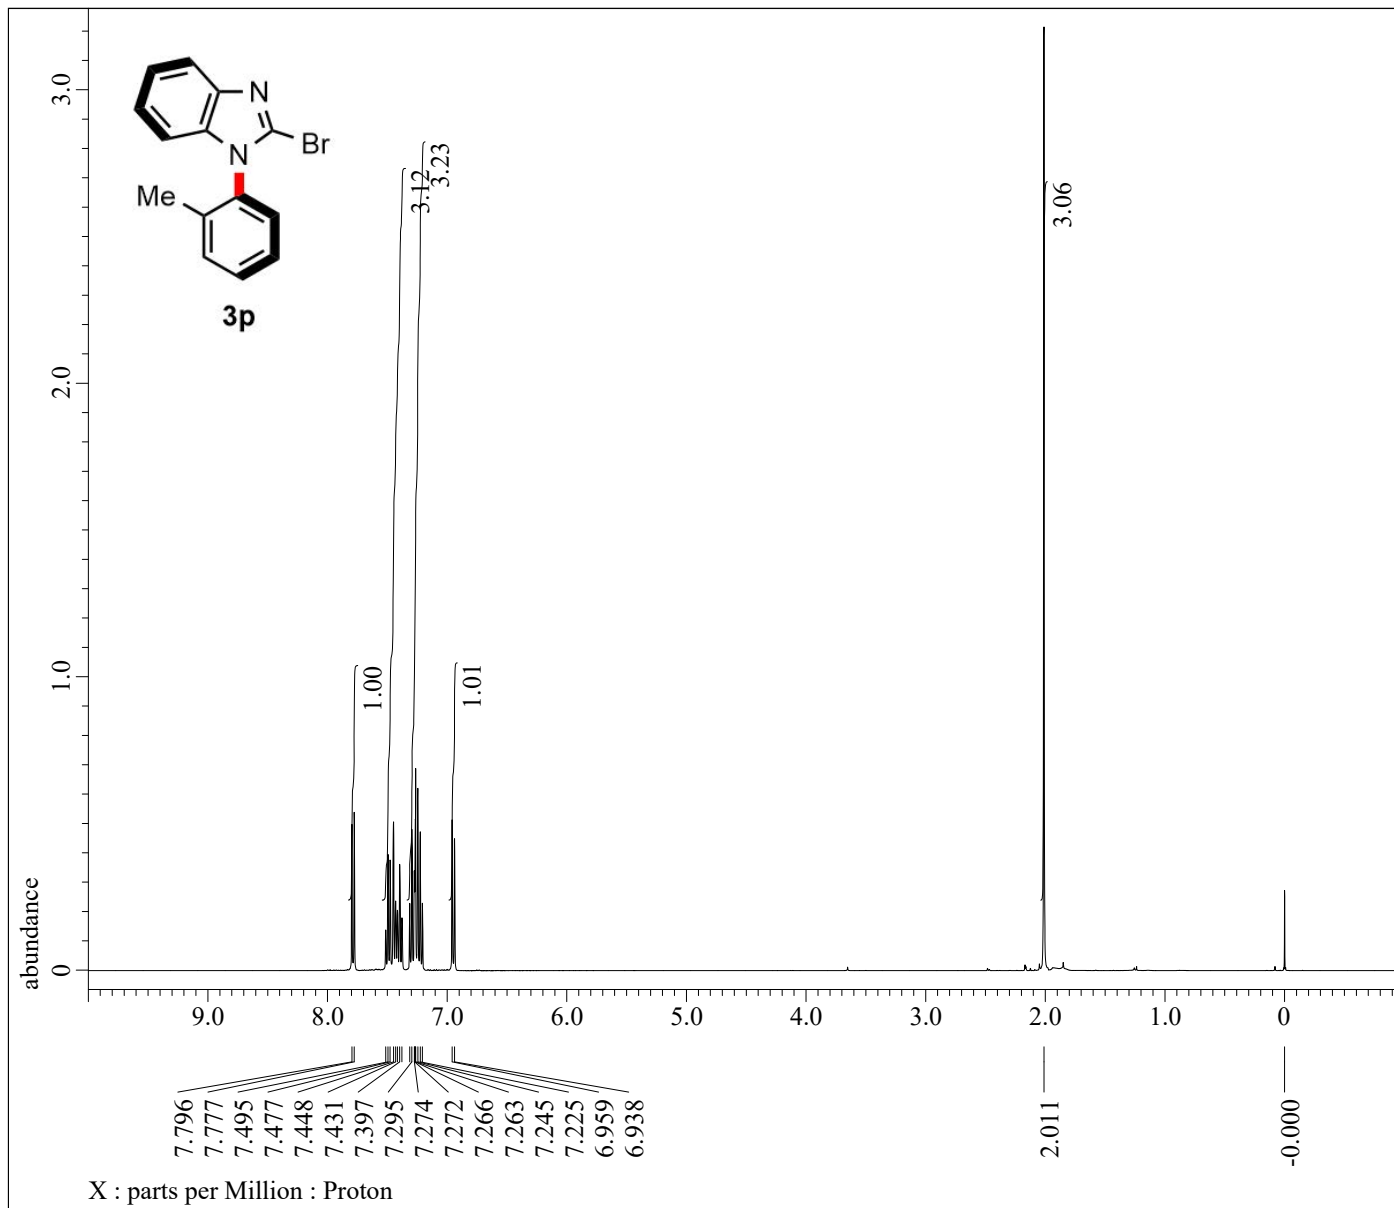

|                   |                      |
|-------------------|----------------------|
| Filename          | = YK-1-40-chiral--E  |
| Author            | = delta              |
| Experiment        | = proton_auto.jxp    |
| Sample Id         | = YK-1-40-chiral--E  |
| Solvent           | = CHLOROFORM-D       |
| Actual_Start_Time | = 24-APR-2023 16:24: |
| Revision_Time     | = 13-OCT-2023 20:56: |
| Comment           | = YK-1-40-chiral--E  |
| Data_Format       | = 1D COMPLEX         |
| Dim_Size          | = 13107              |
| Dim_Title         | = Proton             |
| Dim_Units         | = [ppm]              |
| Dimensions        | = X                  |
| Spectrometer      | = JNM-ECZ400S/L1     |
| Field_Strength    | = 9.389766[T] (400[M |
| X_Acq_Duration    | = 2.18628096[s]      |
| X_Domain          | = Proton             |
| X_Freq            | = 399.78219838[MHz]  |
| X_Offset          | = 5[ppm]             |
| X_Points          | = 16384              |
| X_Prescans        | = 1                  |
| X_Resolution      | = 0.45739775[Hz]     |
| X_Sweep           | = 7.4940048[kHz]     |
| X_Sweep_Clipped   | = 5.99520384[kHz]    |
| Irr_Domain        | = Proton             |
| Irr_Freq          | = 399.78219838[MHz]  |
| Irr_Offset        | = 5[ppm]             |
| Tri_Domain        | = Proton             |
| Tri_Freq          | = 399.78219838[MHz]  |
| Tri_Offset        | = 5[ppm]             |
| Blanking          | = 2[us]              |
| Clipped           | = FALSE              |
| Scans             | = 8                  |
| Total_Scans       | = 8                  |
| Relaxation_Delay  | = 5[s]               |
| Recvr_Gain        | = 46                 |
| Temp_Get          | = 17.2[dC]           |
| X_90_Width        | = 8[us]              |
| X_Acq_Time        | = 2.18628096[s]      |
| X_Angle           | = 45[deg]            |
| X_Atn             | = 6[dB]              |
| X_Pulse           | = 4[us]              |
| Irr_Mode          | = Off                |
| Tri_Mode          | = Off                |
| Dante_Loop        | = 500                |
| Dante_Presat      | = FALSE              |
| Decimation_Rate   | = 0                  |
| Experiment_Path   | = c:\Program Files\J |
| Initial_Wait      | = 1[s]               |
| Phase             | = {0, 90, 270, 180,  |

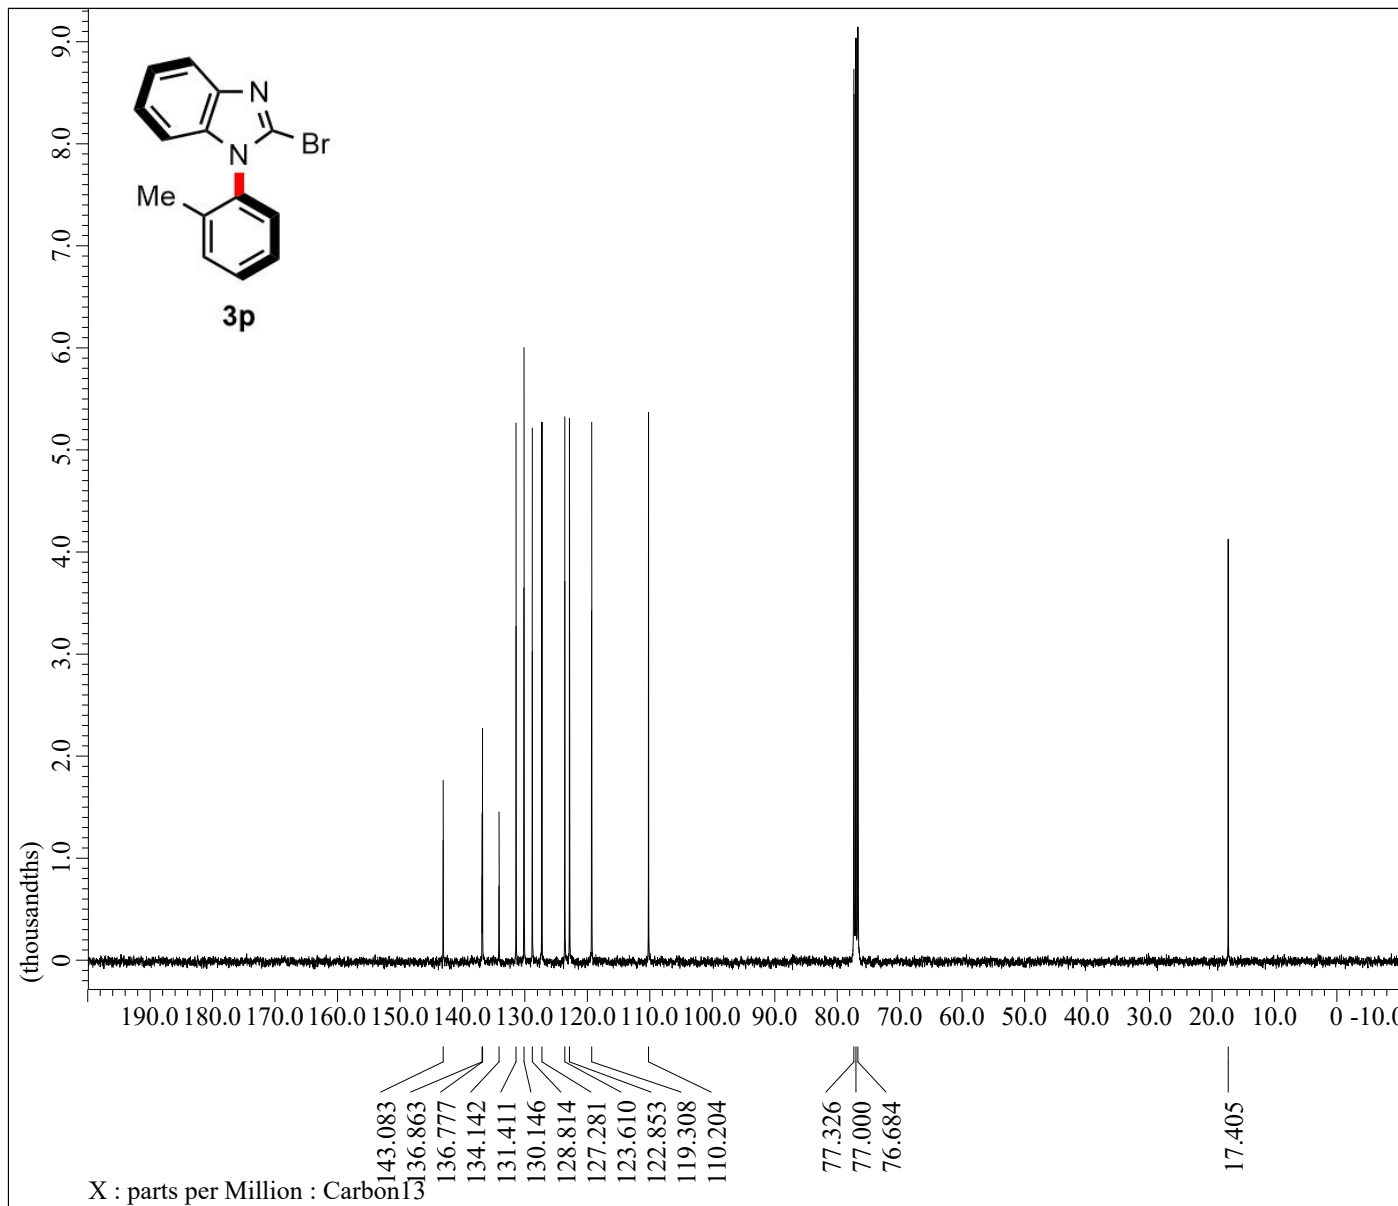

```

Filename           = YKK-1-40-chiral
Author             = delta
Experiment         = carbon_auto.jpg
Sample Id          = YKK-1-40-chiral
Solvent            = CHLOROFORM-D
Actual_Start_Time  = 4-SEP-2023 23:
Revision_Time      = 14-OCT-2023 04:

Comment           = YKK-1-40-chiral
Data_Format       = 1D COMPLEX
Dim_Size          = 26214
Dim_Title         = Carbon13
Dim_Units         = [ppm]
Dimensions        = X
Spectrometer      = JNM-ECZ400S/L1

Field_Strength    = 9.389766[T] (40
X_Acq_Duration    = 1.03809024[s]
X_Domain          = Carbon13
X_Freq            = 100.52530333[MH
X_Offset          = 100[ppm]
X_Points          = 32768
X_Prescans        = 4
X_Resolution      = 0.96330739[Hz]
X_Sweep           = 31.56565657[kHz]
X_Sweep_Clipped  = 25.25252525[kHz]
Irr_Domain        = Proton
Irr_Freq          = 399.78219838[MH
Irr_Offset        = 5[ppm]
Blanking          = 5[us]
Clipped           = TRUE
Scans             = 1024
Total_Scans       = 1024

Relaxation_Delay  = 2[s]
Recvr_Gain        = 50
Temp_Get          = 21.9[dC]
X_90_Width       = 11.1[us]
X_Acq_Time        = 1.03809024[s]
X_Angle           = 30[deg]
X_Atn             = 8[dB]
X_Pulse           = 3.7[us]
Irr_Atn_Dec       = 29.152[dB]
Irr_Atn_Dec_Calc = 29.152[dB]
Irr_Atn_Dec_Default_Calc = 29.152[dB]
Irr_Atn_Noise    = 29.152[dB]
Irr_Dec_Bandwidth_Hz = 4.7826087[kHz]
Irr_Dec_Bandwidth_Ppm = 11.96303566[ppm]
Irr_Dec_Freq      = 399.78219838[MH
Irr_Dec_Merit_Factor = 2.2
Irr_Decoupling   = TRUE
Irr_Noise        = TRUE
Irr_Noise        = WALTZ

```

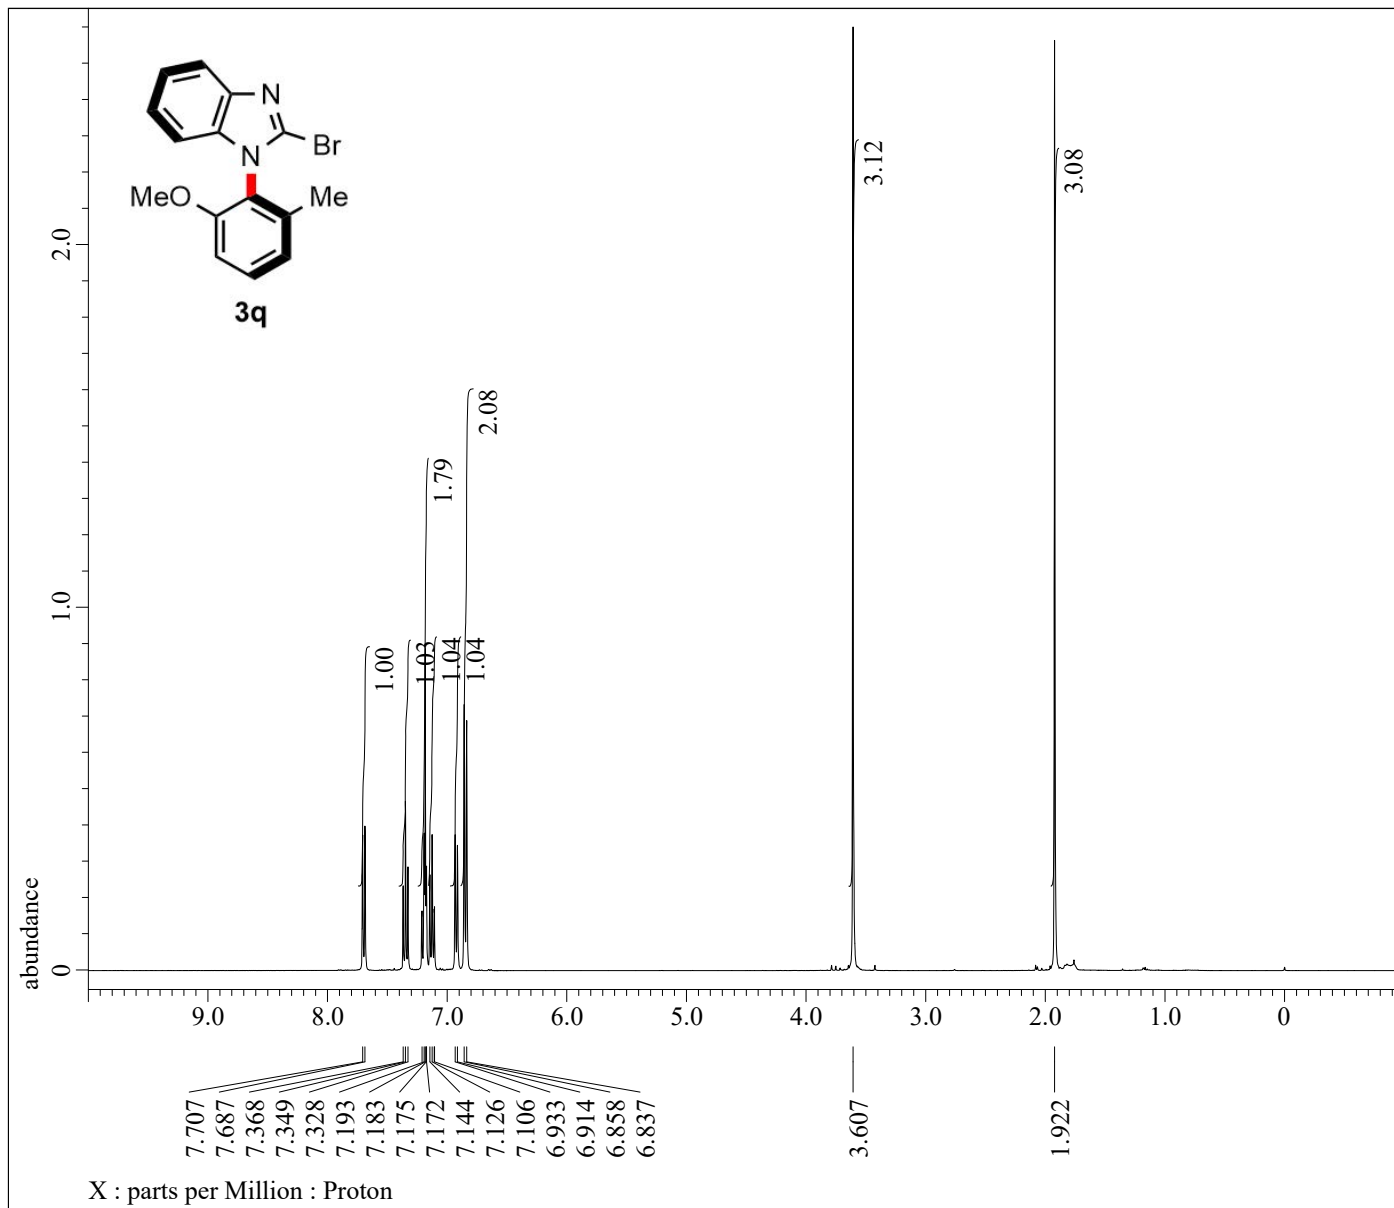

|                   |                      |
|-------------------|----------------------|
| Filename          | = MI-5-29-chiral-Ber |
| Author            | = delta              |
| Experiment        | = proton_auto.jxp    |
| Sample Id         | = MI-5-29-chiral-Ber |
| Solvent           | = CHLOROFORM-D       |
| Actual_Start_Time | = 5-SEP-2023 09:13:  |
| Revision_Time     | = 13-OCT-2023 22:07: |
| Comment           | = MI-5-29-chiral-Ber |
| Data_Format       | = 1D COMPLEX         |
| Dim_Size          | = 13107              |
| Dim_Title         | = Proton             |
| Dim_Units         | = [ppm]              |
| Dimensions        | = X                  |
| Spectrometer      | = JNM-ECZ400S/L1     |
| Field_Strength    | = 9.389766[T] (400[M |
| X_Acq_Duration    | = 2.18628096[s]      |
| X_Domain          | = Proton             |
| X_Freq            | = 399.78219838[MHz]  |
| X_Offset          | = 5[ppm]             |
| X_Points          | = 16384              |
| X_Prescans        | = 1                  |
| X_Resolution      | = 0.45739775[Hz]     |
| X_Sweep           | = 7.4940048[kHz]     |
| X_Sweep_Clipped   | = 5.99520384[kHz]    |
| Irr_Domain        | = Proton             |
| Irr_Freq          | = 399.78219838[MHz]  |
| Irr_Offset        | = 5[ppm]             |
| Tri_Domain        | = Proton             |
| Tri_Freq          | = 399.78219838[MHz]  |
| Tri_Offset        | = 5[ppm]             |
| Blanking          | = 2[us]              |
| Clipped           | = FALSE              |
| Scans             | = 8                  |
| Total_Scans       | = 8                  |
| Relaxation_Delay  | = 5[s]               |
| Recvr_Gain        | = 46                 |
| Temp_Get          | = 21.4[dC]           |
| X_90_Width        | = 8[us]              |
| X_Acq_Time        | = 2.18628096[s]      |
| X_Angle           | = 45[deg]            |
| X_Atn             | = 6[dB]              |
| X_Pulse           | = 4[us]              |
| Irr_Mode          | = Off                |
| Tri_Mode          | = Off                |
| Dante_Loop        | = 500                |
| Dante_Presat      | = FALSE              |
| Decimation_Rate   | = 0                  |
| Experiment_Path   | = c:\Program Files\J |
| Initial_Wait      | = 1[s]               |
| Phase             | = {0, 90, 270, 180,  |

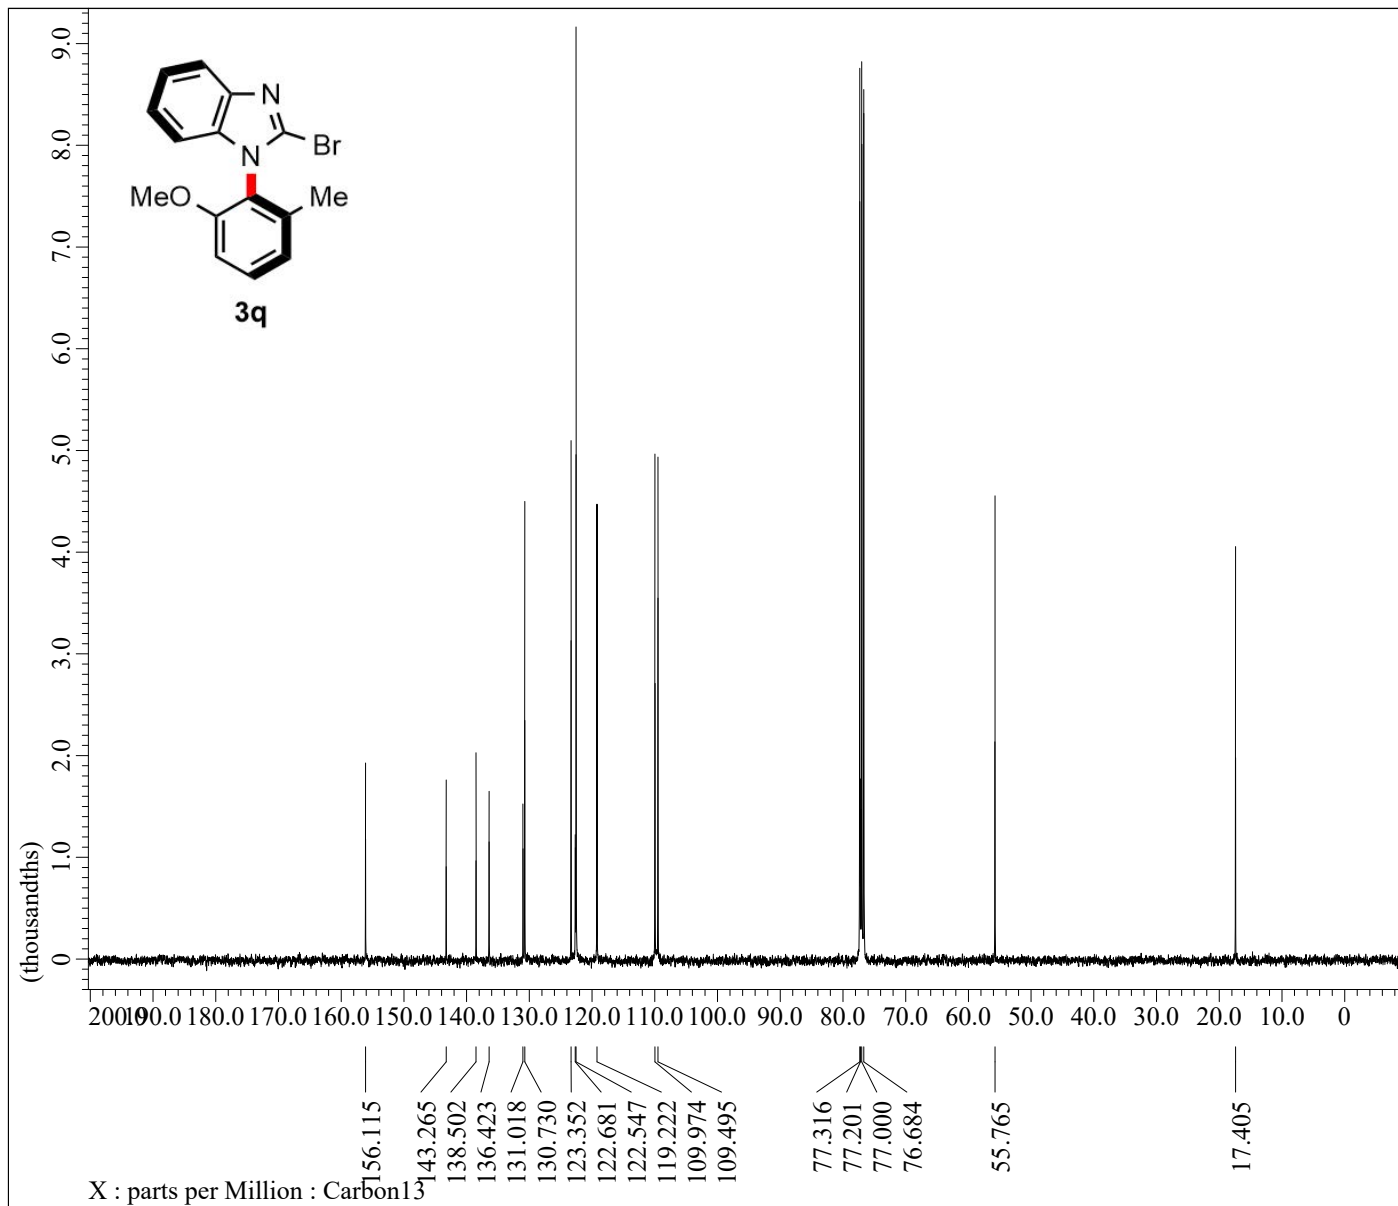

|                          |                   |
|--------------------------|-------------------|
| Filename                 | = MI-5-29-chiral- |
| Author                   | = delta           |
| Experiment               | = carbon_auto.jpg |
| Sample Id                | = MI-5-29-chiral- |
| Solvent                  | = CHLOROFORM-D    |
| Actual_Start_Time        | = 5-SEP-2023 03:  |
| Revision_Time            | = 14-OCT-2023 04: |
| Comment                  | = MI-5-29-chiral- |
| Data_Format              | = 1D COMPLEX      |
| Dim_Size                 | = 26214           |
| Dim_Title                | = Carbon13        |
| Dim_Units                | = [ppm]           |
| Dimensions               | = X               |
| Spectrometer             | = JNM-ECZ400S/L1  |
| Field_Strength           | = 9.389766[T] (40 |
| X_Acq_Duration           | = 1.03809024[s]   |
| X_Domain                 | = Carbon13        |
| X_Freq                   | = 100.52530333[MH |
| X_Offset                 | = 100[ppm]        |
| X_Points                 | = 32768           |
| X_Prescans               | = 4               |
| X_Resolution             | = 0.96330739[Hz]  |
| X_Sweep                  | = 31.56565657[kHz |
| X_Sweep_Clipped          | = 25.25252525[kHz |
| Irr_Domain               | = Proton          |
| Irr_Freq                 | = 399.78219838[MH |
| Irr_Offset               | = 5[ppm]          |
| Blanking                 | = 5[us]           |
| Clipped                  | = TRUE            |
| Scans                    | = 1024            |
| Total_Scans              | = 1024            |
| Relaxation_Delay         | = 2[s]            |
| Recvr_Gain               | = 50              |
| Temp_Get                 | = 21.6[dC]        |
| X_90_Width               | = 11.1[us]        |
| X_Acq_Time               | = 1.03809024[s]   |
| X_Angle                  | = 30[deg]         |
| X_Atn                    | = 8[dB]           |
| X_Pulse                  | = 3.7[us]         |
| Irr_Atn_Dec              | = 29.152[dB]      |
| Irr_Atn_Dec_Calc         | = 29.152[dB]      |
| Irr_Atn_Dec_Default_Calc | = 29.152[dB]      |
| Irr_Atn_No               | = 29.152[dB]      |
| Irr_Dec_Bandwidth_Hz     | = 4.7826087[kHz]  |
| Irr_Dec_Bandwidth_Ppm    | = 11.96303566[ppm |
| Irr_Dec_Freq             | = 399.78219838[MH |
| Irr_Dec_Merit_Factor     | = 2.2             |
| Irr_Decoupling           | = TRUE            |
| Irr_No                   | = TRUE            |
| Irr_Noise                | = WALTZ           |

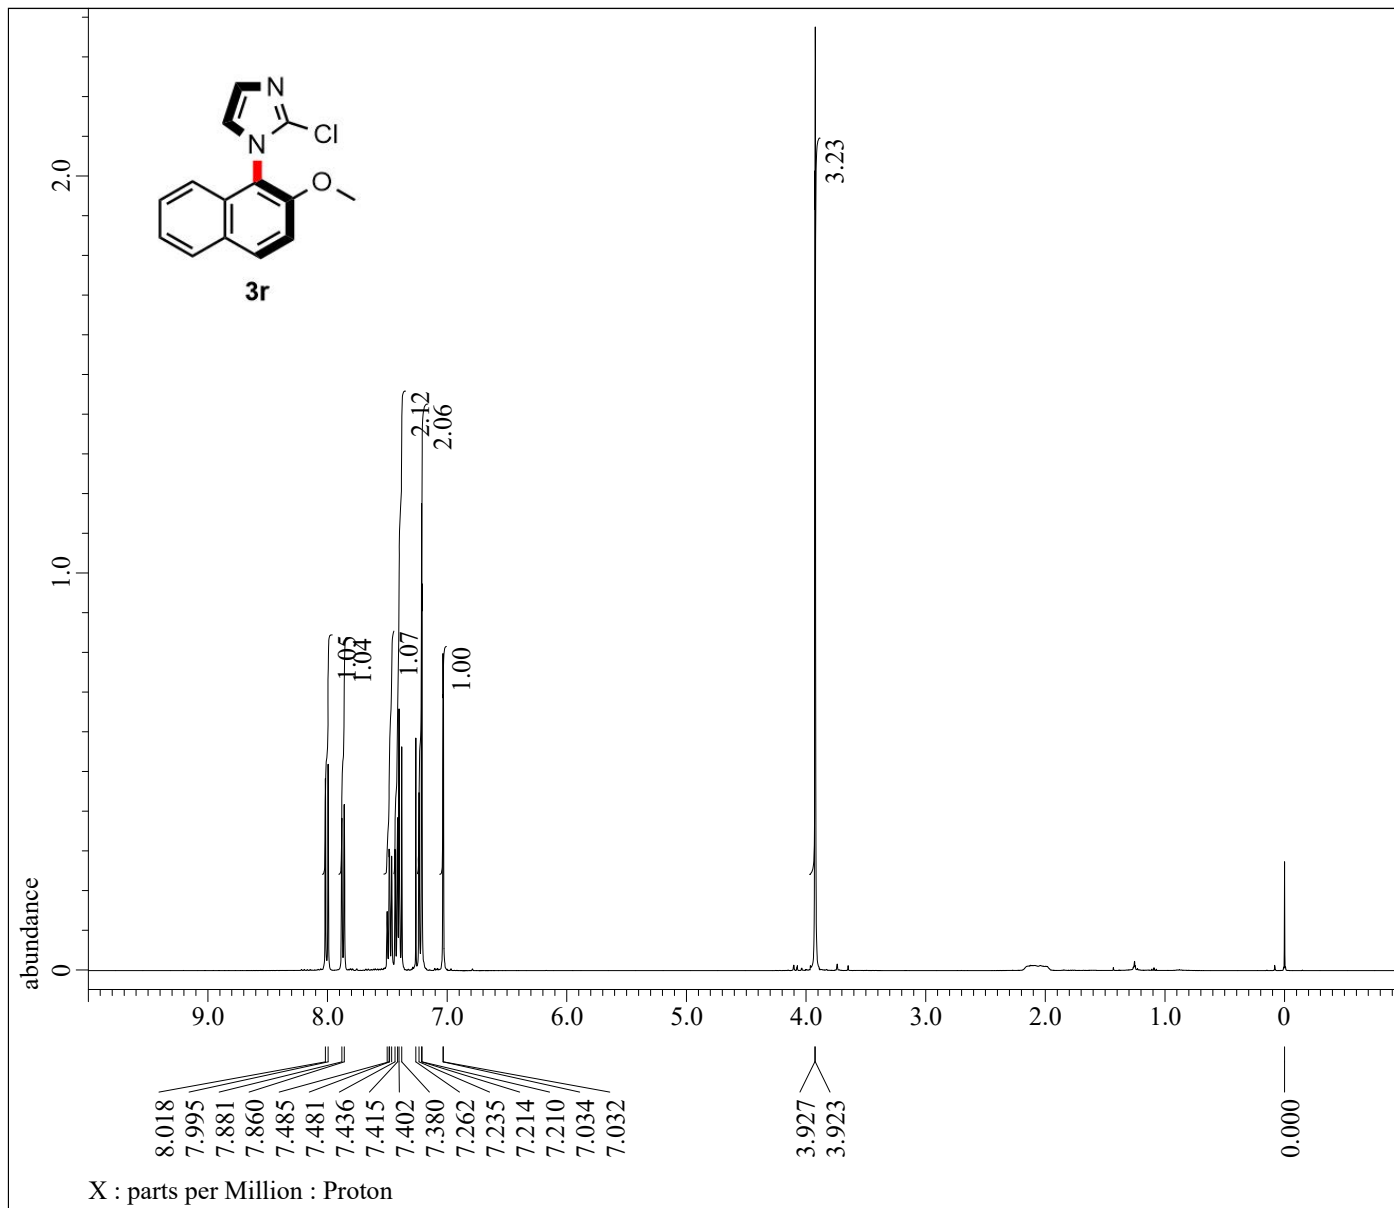

|                   |                      |
|-------------------|----------------------|
| Filename          | = MI-5-57-chiral-Imi |
| Author            | = delta              |
| Experiment        | = proton_auto.jpg    |
| Sample Id         | = MI-5-57-chiral-Imi |
| Solvent           | = CHLOROFORM-D       |
| Actual_Start_Time | = 22-SEP-2023 05:05: |
| Revision_Time     | = 13-OCT-2023 23:50: |
| Comment           | = MI-5-57-chiral-Imi |
| Data_Format       | = 1D COMPLEX         |
| Dim_Size          | = 13107              |
| Dim_Title         | = Proton             |
| Dim_Units         | = [ppm]              |
| Dimensions        | = X                  |
| Spectrometer      | = JNM-ECZ400S/L1     |
| Field_Strength    | = 9.389766[T] (400[M |
| X_Acq_Duration    | = 2.18628096[s]      |
| X_Domain          | = Proton             |
| X_Freq            | = 399.78219838[MHz]  |
| X_Offset          | = 5[ppm]             |
| X_Points          | = 16384              |
| X_Prescans        | = 1                  |
| X_Resolution      | = 0.45739775[Hz]     |
| X_Sweep           | = 7.4940048[kHz]     |
| X_Sweep_Clipped   | = 5.99520384[kHz]    |
| Irr_Domain        | = Proton             |
| Irr_Freq          | = 399.78219838[MHz]  |
| Irr_Offset        | = 5[ppm]             |
| Tri_Domain        | = Proton             |
| Tri_Freq          | = 399.78219838[MHz]  |
| Tri_Offset        | = 5[ppm]             |
| Blanking          | = 2[us]              |
| Clipped           | = FALSE              |
| Scans             | = 8                  |
| Total_Scans       | = 8                  |
| Relaxation_Delay  | = 5[s]               |
| Recvr_Gain        | = 46                 |
| Temp_Get          | = 17.8[dC]           |
| X_90_Width        | = 8[us]              |
| X_Acq_Time        | = 2.18628096[s]      |
| X_Angle           | = 45[deg]            |
| X_Atn             | = 6[dB]              |
| X_Pulse           | = 4[us]              |
| Irr_Mode          | = Off                |
| Tri_Mode          | = Off                |
| Dante_Loop        | = 500                |
| Dante_Presat      | = FALSE              |
| Decimation_Rate   | = 0                  |
| Experiment_Path   | = c:\Program Files\J |
| Initial_Wait      | = 1[s]               |
| Phase             | = {0, 90, 270, 180,  |

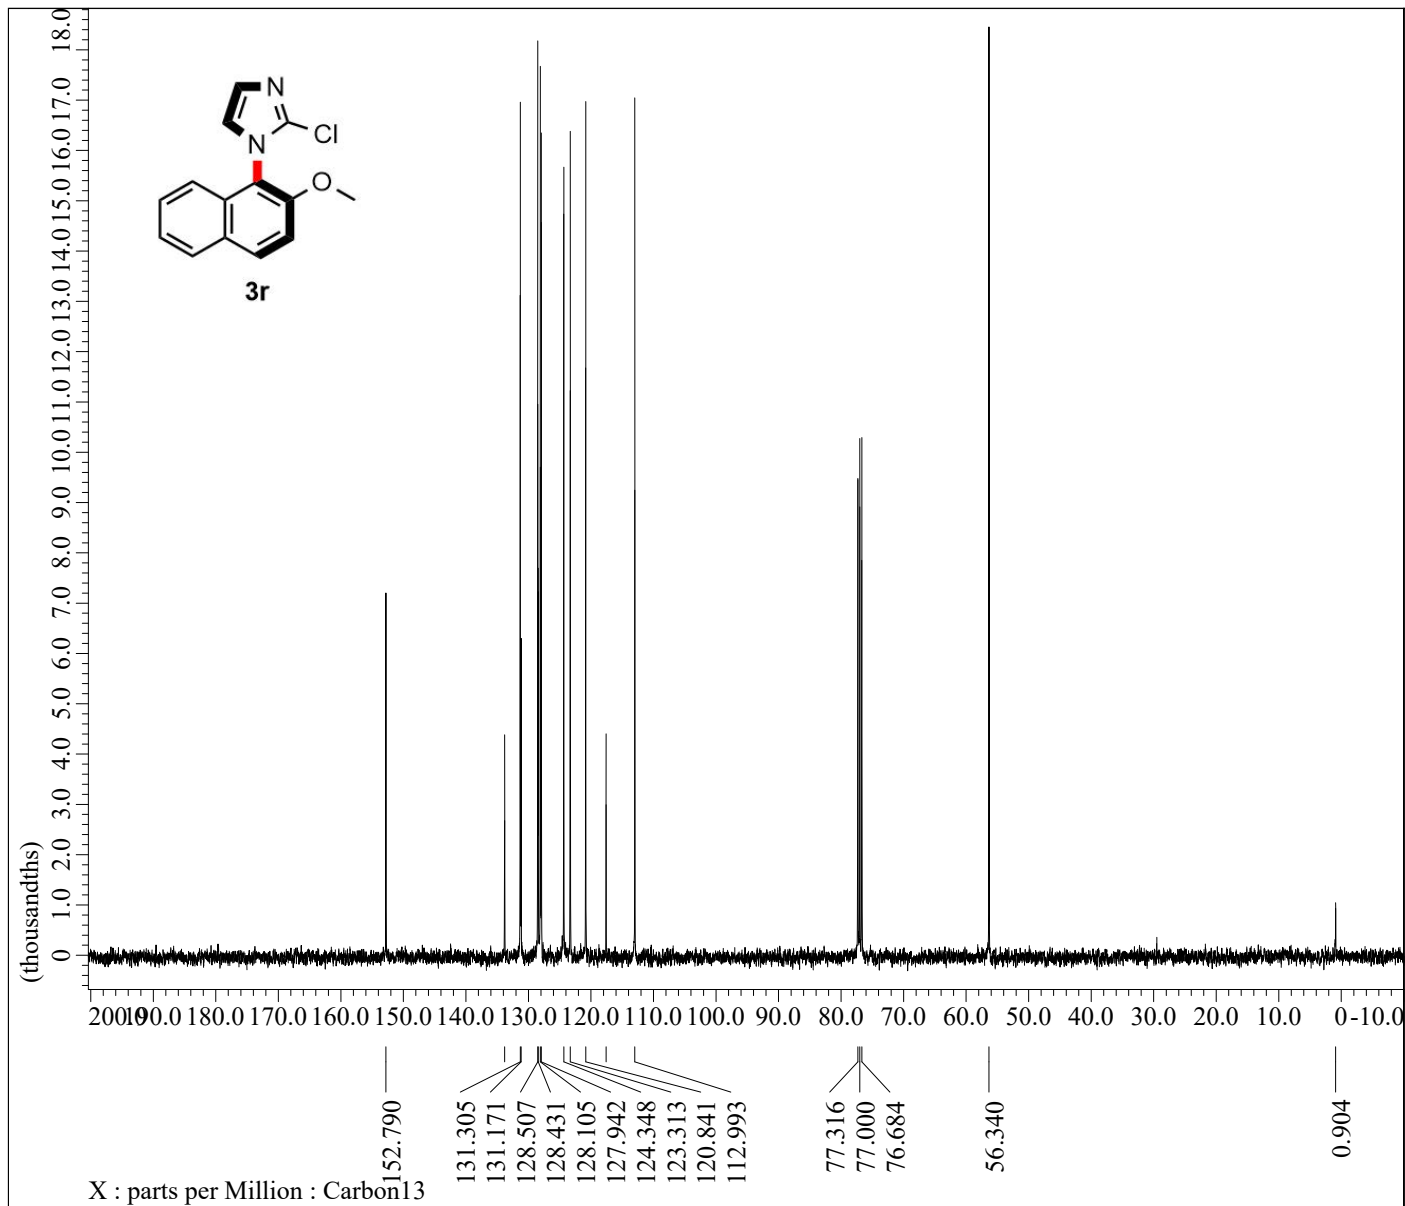

|                          |                   |
|--------------------------|-------------------|
| Filename                 | = MI-4-107--Imi-C |
| Author                   | = delta           |
| Experiment               | = carbon_auto.jpg |
| Sample Id                | = MI-4-107--Imi-C |
| Solvent                  | = CHLOROFORM-D    |
| Actual_Start_Time        | = 24-AUG-2023 12: |
| Revision_Time            | = 14-OCT-2023 04: |
| Comment                  | = MI-4-107--Imi-C |
| Data_Format              | = 1D COMPLEX      |
| Dim_Size                 | = 26214           |
| Dim_Title                | = Carbon13        |
| Dim_Units                | = [ppm]           |
| Dimensions               | = X               |
| Spectrometer             | = JNM-ECZ400S/L1  |
| Field_Strength           | = 9.389766[T] (40 |
| X_Acq_Duration           | = 1.03809024[s]   |
| X_Domain                 | = Carbon13        |
| X_Freq                   | = 100.52530333[MH |
| X_Offset                 | = 100[ppm]        |
| X_Points                 | = 32768           |
| X_Prescans               | = 4               |
| X_Resolution             | = 0.96330739[Hz]  |
| X_Sweep                  | = 31.56565657[kHz |
| X_Sweep_Clipped          | = 25.25252525[kHz |
| Irr_Domain               | = Proton          |
| Irr_Freq                 | = 399.78219838[MH |
| Irr_Offset               | = 5[ppm]          |
| Blanking                 | = 5[us]           |
| Clipped                  | = FALSE           |
| Incomplete_Copy          | = TRUE            |
| Scans                    | = 97              |
| Total_Scans              | = 97              |
| Relaxation_Delay         | = 2[s]            |
| Recvr_Gain               | = 50              |
| Temp_Get                 | = 21.8[dC]        |
| X_90_Width               | = 11.1[us]        |
| X_Acq_Time               | = 1.03809024[s]   |
| X_Angle                  | = 30[deg]         |
| X_Atn                    | = 8[dB]           |
| X_Pulse                  | = 3.7[us]         |
| Irr_Atn_Dec              | = 29.152[dB]      |
| Irr_Atn_Dec_Calc         | = 29.152[dB]      |
| Irr_Atn_Dec_Default_Calc | = 29.152[dB]      |
| Irr_Atn_No               | = 29.152[dB]      |
| Irr_Dec_Bandwidth_Hz     | = 4.7826087[kHz]  |
| Irr_Dec_Bandwidth_Ppm    | = 11.96303566[ppm |
| Irr_Dec_Freq             | = 399.78219838[MH |
| Irr_Dec_Merit_Factor     | = 2.2             |
| Irr_Decoupling           | = TRUE            |
| Irr_No                   | = TRUE            |

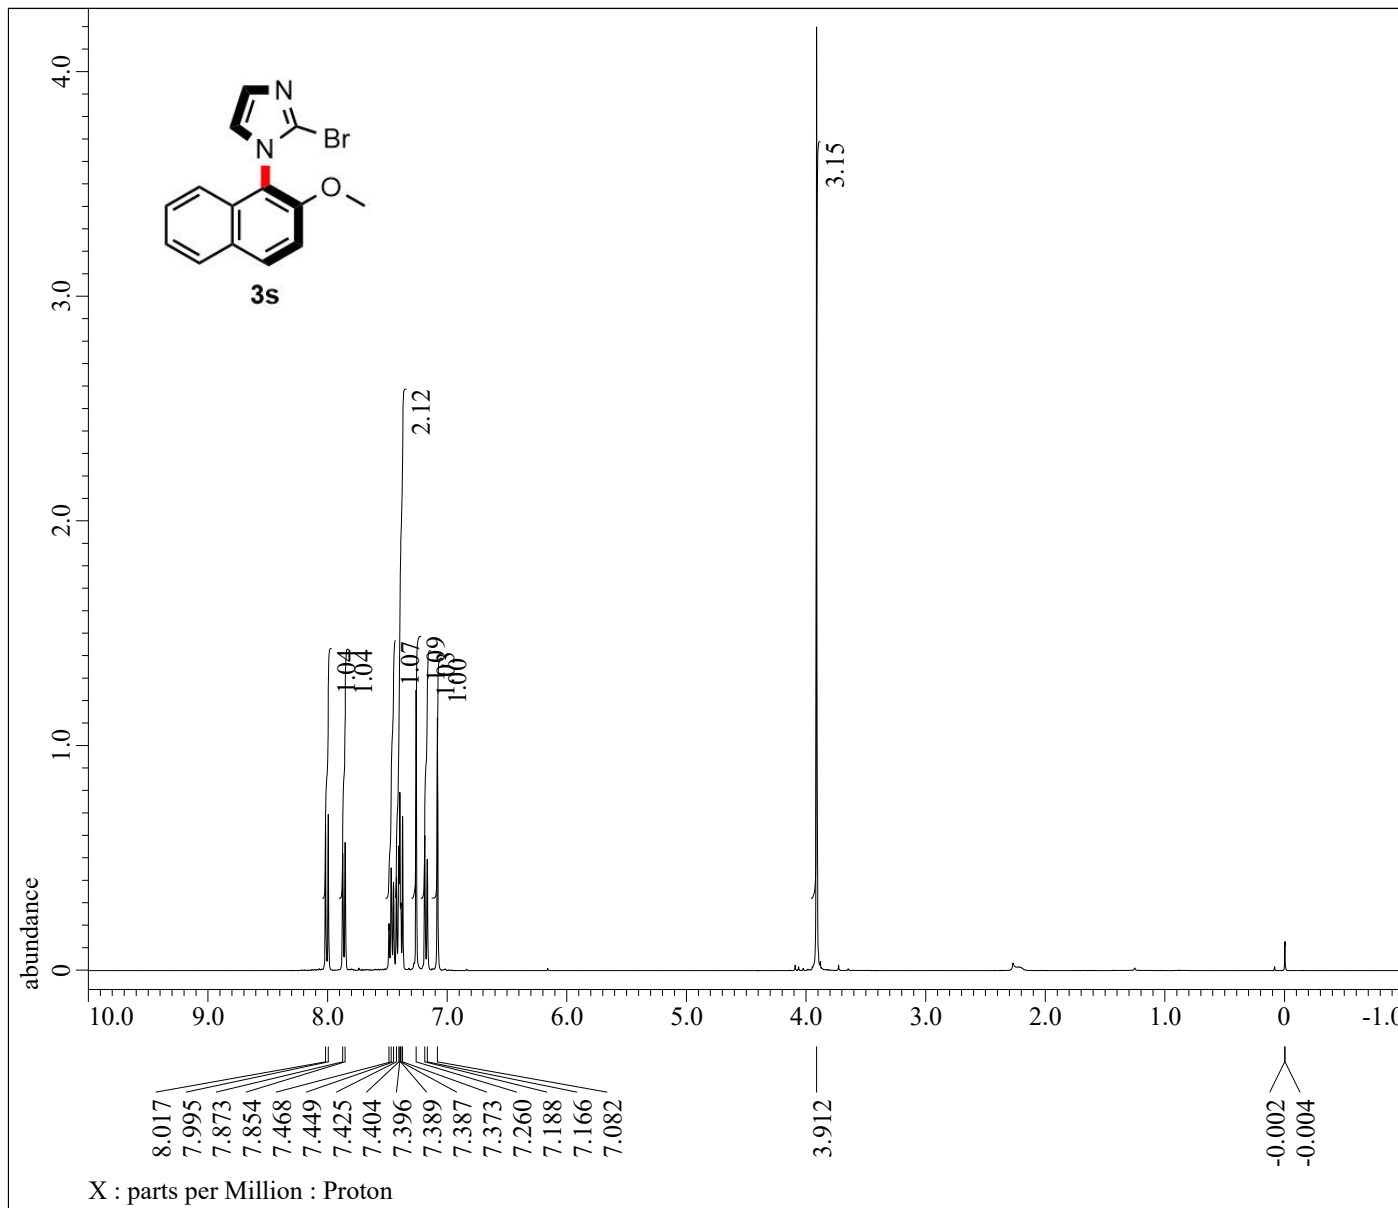

|                   |                      |
|-------------------|----------------------|
| Filename          | = MI-5-58-chiral-Imi |
| Author            | = delta              |
| Experiment        | = proton_auto.jxp    |
| Sample Id         | = MI-5-58-chiral-Imi |
| Solvent           | = CHLOROFORM-D       |
| Actual_Start_Time | = 22-SEP-2023 05:09: |
| Revision_Time     | = 13-OCT-2023 23:57: |
| Comment           | = MI-5-58-chiral-Imi |
| Data_Format       | = 1D COMPLEX         |
| Dim_Size          | = 13107              |
| Dim_Title         | = Proton             |
| Dim_Units         | = [ppm]              |
| Dimensions        | = X                  |
| Spectrometer      | = JNM-ECZ400S/L1     |
| Field_Strength    | = 9.389766[T] (400[M |
| X_Acq_Duration    | = 2.18628096[s]      |
| X_Domain          | = Proton             |
| X_Freq            | = 399.78219838[MHz]  |
| X_Offset          | = 5[ppm]             |
| X_Points          | = 16384              |
| X_Prescans        | = 1                  |
| X_Resolution      | = 0.45739775[Hz]     |
| X_Sweep           | = 7.4940048[kHz]     |
| X_Sweep_Clipped   | = 5.99520384[kHz]    |
| Irr_Domain        | = Proton             |
| Irr_Freq          | = 399.78219838[MHz]  |
| Irr_Offset        | = 5[ppm]             |
| Tri_Domain        | = Proton             |
| Tri_Freq          | = 399.78219838[MHz]  |
| Tri_Offset        | = 5[ppm]             |
| Blanking          | = 2[us]              |
| Clipped           | = FALSE              |
| Scans             | = 8                  |
| Total_Scans       | = 8                  |
| Relaxation_Delay  | = 5[s]               |
| Recvr_Gain        | = 46                 |
| Temp_Get          | = 17.9[dC]           |
| X_90_Width        | = 8[us]              |
| X_Acq_Time        | = 2.18628096[s]      |
| X_Angle           | = 45[deg]            |
| X_Atn             | = 6[dB]              |
| X_Pulse           | = 4[us]              |
| Irr_Mode          | = Off                |
| Tri_Mode          | = Off                |
| Dante_Loop        | = 500                |
| Dante_Presat      | = FALSE              |
| Decimation_Rate   | = 0                  |
| Experiment_Path   | = c:\Program Files\J |
| Initial_Wait      | = 1[s]               |
| Phase             | = {0, 90, 270, 180,  |



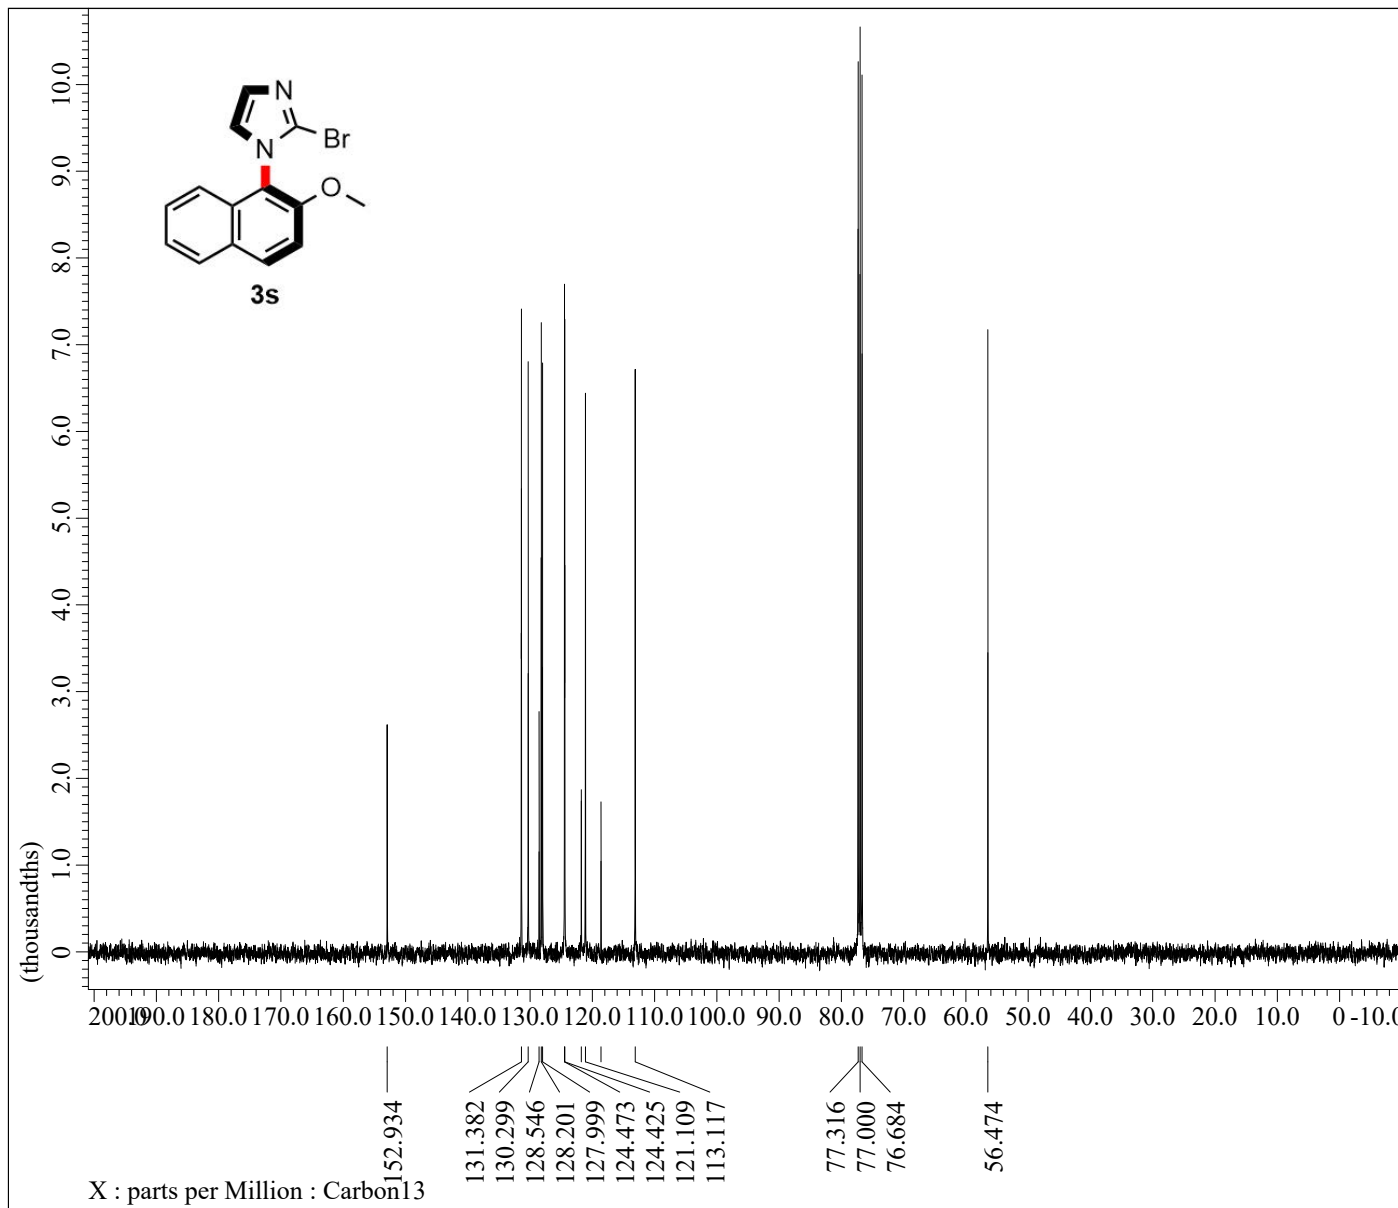

```

Filename           = MI-Imi-Br-Nap-C
Author             = delta
Experiment         = carbon_auto.jpg
Sample Id          = MI-Imi-Br-Nap-C
Solvent            = CHLOROFORM-D
Actual_Start_Time  = 24-AUG-2023 12:
Revision_Time      = 14-OCT-2023 05:

Comment           = MI-Imi-Br-Nap-C
Data_Format       = 1D COMPLEX
Dim_Size          = 26214
Dim_Title         = Carbon13
Dim_Units         = [ppm]
Dimensions        = X
Spectrometer      = JNM-ECZ400S/L1

Field_Strength    = 9.389766[T] (40
X_Acq_Duration    = 1.03809024[s]
X_Domain          = Carbon13
X_Freq            = 100.52530333[MH
X_Offset          = 100[ppm]
X_Points          = 32768
X_Prescans        = 4
X_Resolution      = 0.96330739[Hz]
X_Sweep           = 31.56565657[kHz]
X_Sweep_Clipped   = 25.25252525[kHz]
Irr_Domain        = Proton
Irr_Freq          = 399.78219838[MH
Irr_Offset        = 5[ppm]
Blanking          = 5[us]
Clipped           = FALSE
Incomplete_Copy   = TRUE
Scans             = 207.0
Total_Scans       = 207.0

Relaxation_Delay  = 2[s]
Recvr_Gain        = 50
Temp_Get          = 21.7[dC]
X_90_Width        = 11.1[us]
X_Acq_Time        = 1.03809024[s]
X_Angle           = 30[deg]
X_Atn             = 8[dB]
X_Pulse           = 3.7[us]
Irr_Atn_Dec       = 29.152[dB]
Irr_Atn_Dec_Calc  = 29.152[dB]
Irr_Atn_Dec_Default_Calc = 29.152[dB]
Irr_Atn_Noise     = 29.152[dB]
Irr_Dec_Bandwidth_Hz = 4.7826087[kHz]
Irr_Dec_Bandwidth_Ppm = 11.96303566[ppm]
Irr_Dec_Freq      = 399.78219838[MH
Irr_Dec_Merit_Factor = 2.2
Irr_Decoupling    = TRUE
Irr_Noise         = TRUE
  
```

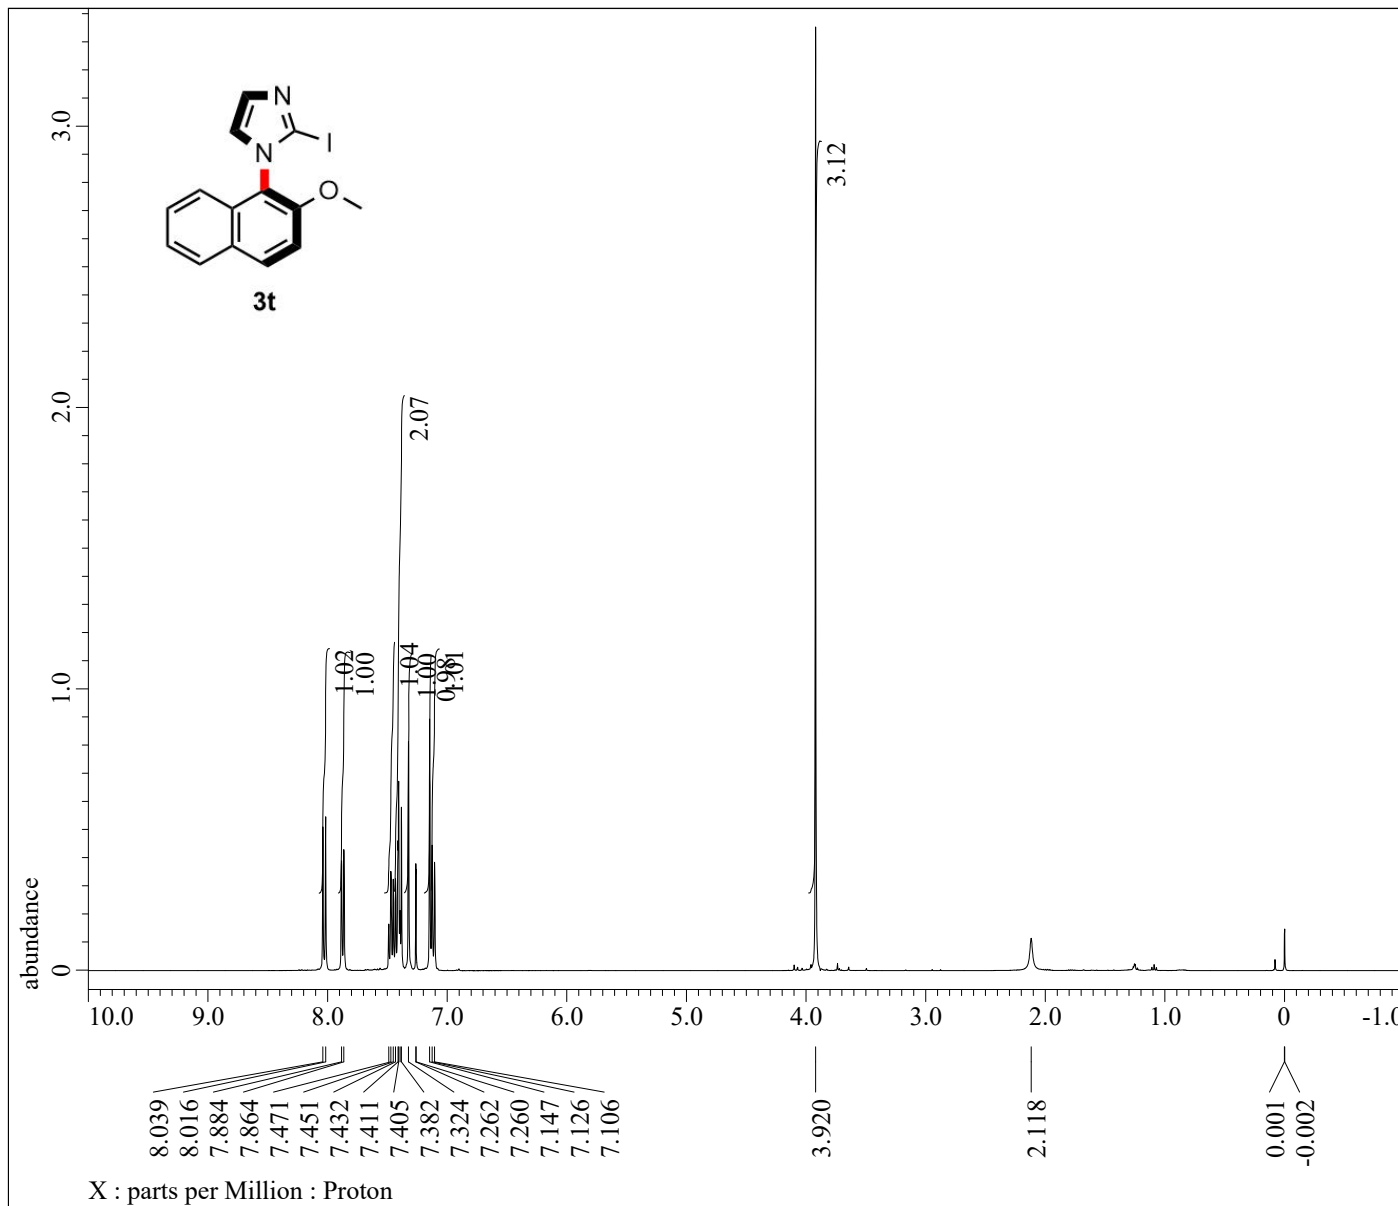

```

Filename      = MI-5-23-Imi-I-Nap-
Author       = delta
Experiment   = proton_auto.jxp
Sample Id    = MI-5-23-Imi-I-Nap-
Solvent      = CHLOROFORM-D
Actual_Start_Time = 31-AUG-2023 08:43:
Revision_Time  = 14-OCT-2023 00:08:

Comment      = MI-5-23-Imi-I-Nap-
Data_Format  = 1D COMPLEX
Dim_Size     = 13107
Dim_Title    = Proton
Dim_Units    = [ppm]
Dimensions   = X
Spectrometer = JNM-ECZ400S/L1

Field_Strength = 9.389766[T] (400[M
X_Acq_Duration = 2.18628096[s]
X_Domain       = Proton
X_Freq         = 399.78219838[MHz]
X_Offset       = 5[ppm]
X_Points       = 16384
X_Prescans     = 1
X_Resolution   = 0.45739775[Hz]
X_Sweep        = 7.4940048[kHz]
X_Sweep_Clipped = 5.99520384[kHz]
Irr_Domain     = Proton
Irr_Freq       = 399.78219838[MHz]
Irr_Offset     = 5[ppm]
Tri_Domain     = Proton
Tri_Freq       = 399.78219838[MHz]
Tri_Offset     = 5[ppm]
Blanking       = 2[us]
Clipped        = FALSE
Scans          = 8
Total_Scans    = 8

Relaxation_Delay = 5[s]
Recvr_Gain       = 46
Temp_Get         = 20.5[dC]
X_90_Width       = 8[us]
X_Acq_Time       = 2.18628096[s]
X_Angle          = 45[deg]
X_Atn            = 6[dB]
X_Pulse          = 4[us]
Irr_Mode         = Off
Tri_Mode         = Off
Dante_Loop       = 500
Dante_Presat     = FALSE
Decimation_Rate = 0
Experiment_Path  = c:\Program Files\J
Initial_Wait     = 1[s]
Phase            = {0, 90, 270, 180,

```

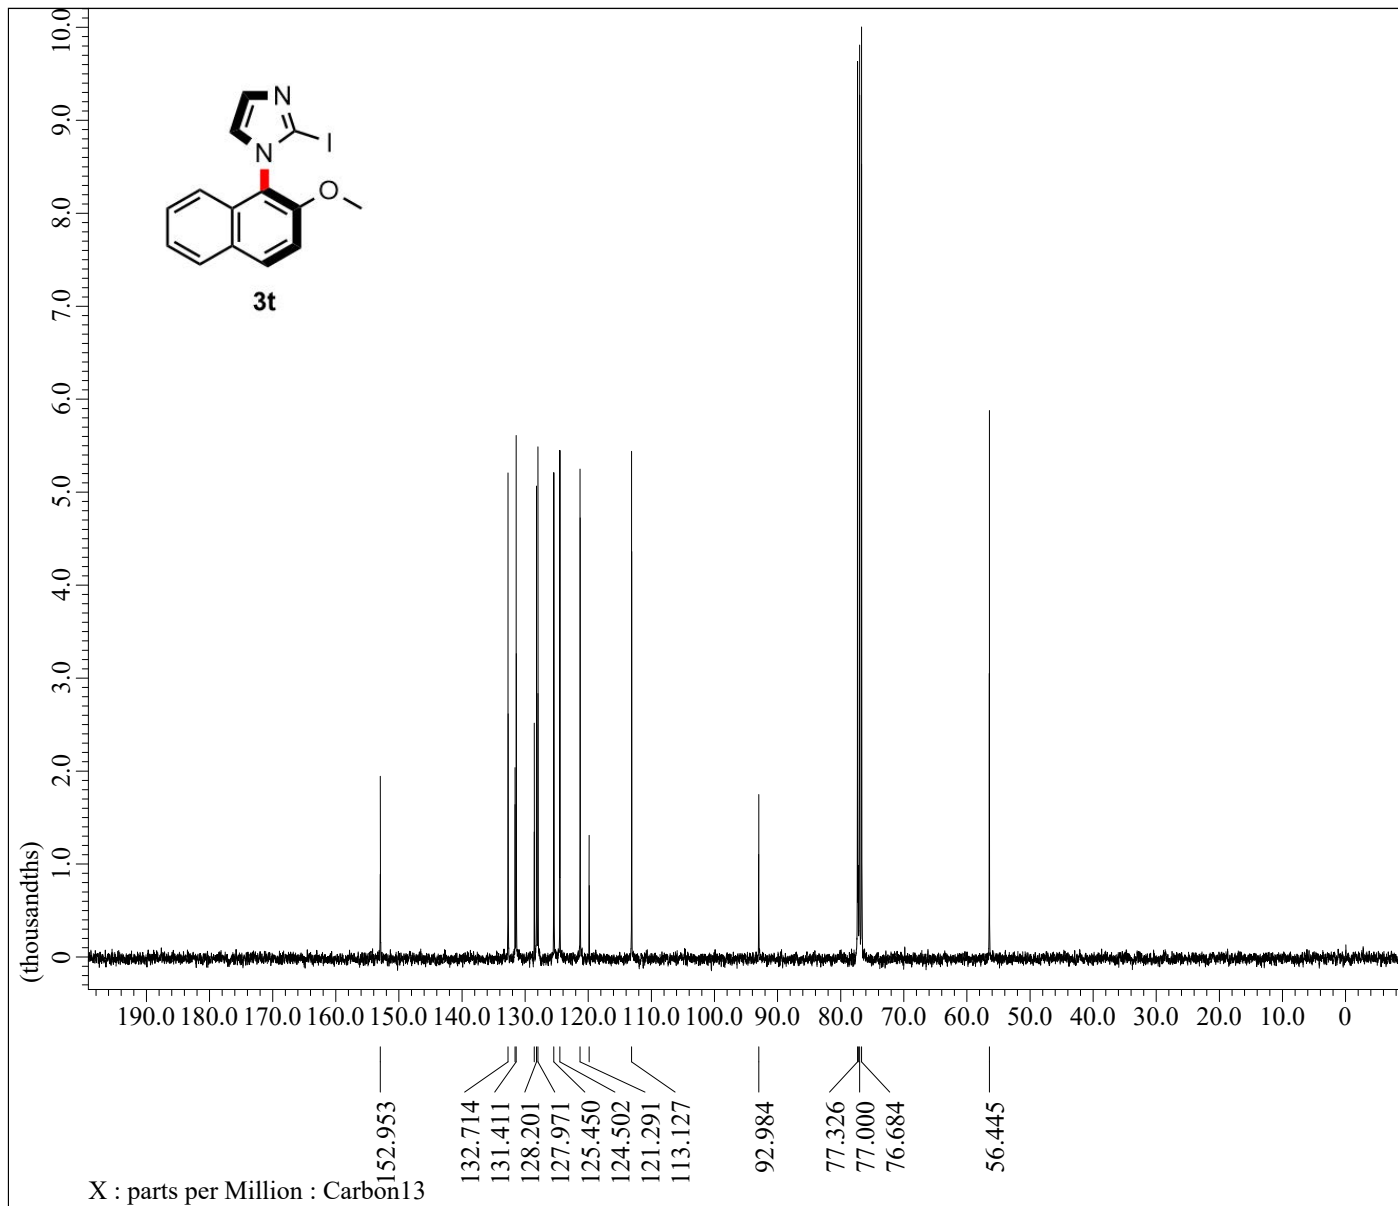

```

Filename           = MI-5-23-Imi-I-N
Author             = delta
Experiment         = carbon_auto.jpg
Sample_Id          = MI-5-23-Imi-I-N
Solvent            = CHLOROFORM-D
Actual_Start_Time  = 1-SEP-2023 17:
Revision_Time      = 14-OCT-2023 05:

Comment           = MI-5-23-Imi-I-N
Data_Format       = 1D COMPLEX
Dim_Size          = 26214
Dim_Title         = Carbon13
Dim_Units         = [ppm]
Dimensions        = X
Spectrometer      = JNM-ECZ400S/L1

Field_Strength    = 9.389766[T] (40
X_Acq_Duration    = 1.03809024[s]
X_Domain          = Carbon13
X_Freq            = 100.52530333[MH
X_Offset          = 100[ppm]
X_Points          = 32768
X_Prescans        = 4
X_Resolution      = 0.96330739[Hz]
X_Sweep           = 31.56565657[kHz]
X_Sweep_Clipped  = 25.25252525[kHz]
Irr_Domain        = Proton
Irr_Freq          = 399.78219838[MH
Irr_Offset        = 5[ppm]
Blanking          = 5[us]
Clipped           = TRUE
Scans             = 512
Total_Scans       = 512

Relaxation_Delay  = 2[s]
Recvr_Gain        = 50
Temp_Get          = 21.4[dC]
X_90_Width        = 11.1[us]
X_Acq_Time        = 1.03809024[s]
X_Angle           = 30[deg]
X_Atn             = 8[dB]
X_Pulse           = 3.7[us]
Irr_Atn_Dec       = 29.152[dB]
Irr_Atn_Dec_Calc = 29.152[dB]
Irr_Atn_Dec_Default_Calc = 29.152[dB]
Irr_Atn_Noise    = 29.152[dB]
Irr_Dec_Bandwidth_Hz = 4.7826087[kHz]
Irr_Dec_Bandwidth_Ppm = 11.96303566[ppm]
Irr_Dec_Freq      = 399.78219838[MH
Irr_Dec_Merit_Factor = 2.2
Irr_Decoupling    = TRUE
Irr_Noise         = TRUE
Irr_Noise         = WALTZ

```

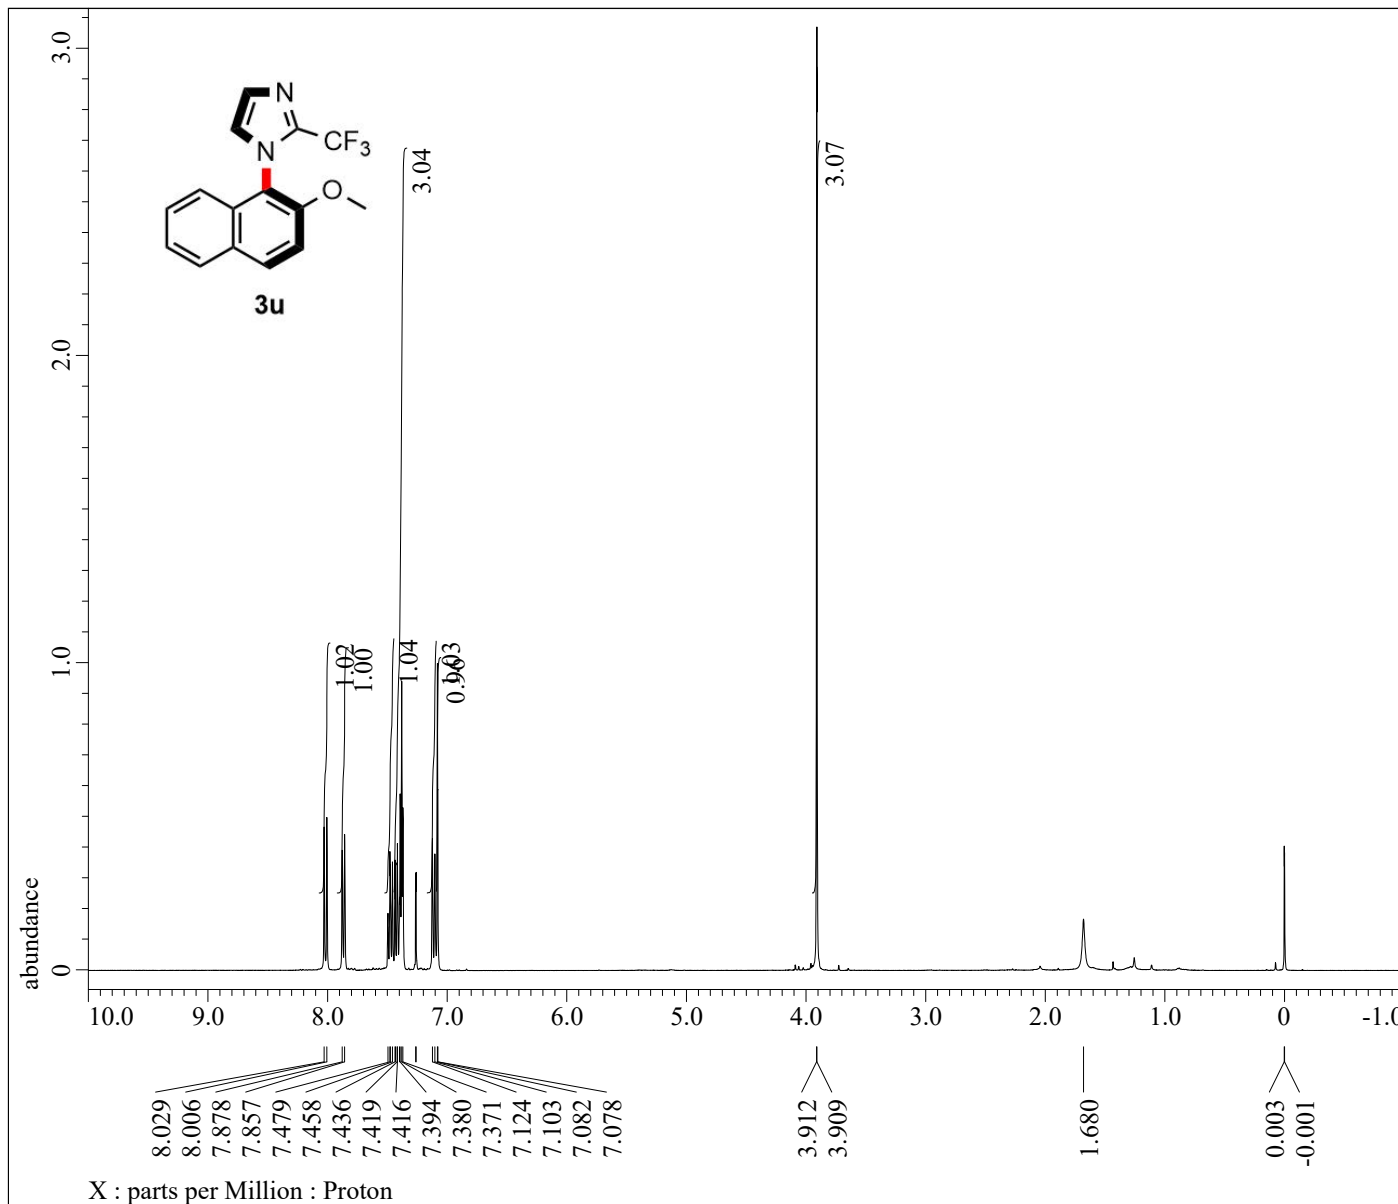

|                   |                      |
|-------------------|----------------------|
| Filename          | = MI-4-77-chilal-Imi |
| Author            | = delta              |
| Experiment        | = proton_auto.jxp    |
| Sample Id         | = MI-4-77-chilal-Imi |
| Solvent           | = CHLOROFORM-D       |
| Actual_Start_Time | = 24-AUG-2023 11:00: |
| Revision_Time     | = 14-OCT-2023 00:17: |
| Comment           | = MI-4-77-chilal-Imi |
| Data_Format       | = 1D COMPLEX         |
| Dim_Size          | = 13107              |
| Dim_Title         | = Proton             |
| Dim_Units         | = [ppm]              |
| Dimensions        | = X                  |
| Spectrometer      | = JNM-ECZ400S/L1     |
| Field_Strength    | = 9.389766[T] (400[M |
| X_Acq_Duration    | = 2.18628096[s]      |
| X_Domain          | = Proton             |
| X_Freq            | = 399.78219838[MHz]  |
| X_Offset          | = 5[ppm]             |
| X_Points          | = 16384              |
| X_Prescans        | = 1                  |
| X_Resolution      | = 0.45739775[Hz]     |
| X_Sweep           | = 7.4940048[kHz]     |
| X_Sweep_Clipped   | = 5.99520384[kHz]    |
| Irr_Domain        | = Proton             |
| Irr_Freq          | = 399.78219838[MHz]  |
| Irr_Offset        | = 5[ppm]             |
| Tri_Domain        | = Proton             |
| Tri_Freq          | = 399.78219838[MHz]  |
| Tri_Offset        | = 5[ppm]             |
| Blanking          | = 2[us]              |
| Clipped           | = FALSE              |
| Scans             | = 8                  |
| Total_Scans       | = 8                  |
| Relaxation_Delay  | = 5[s]               |
| Recvr_Gain        | = 56                 |
| Temp_Get          | = 21.8[dC]           |
| X_90_Width        | = 8[us]              |
| X_Acq_Time        | = 2.18628096[s]      |
| X_Angle           | = 45[deg]            |
| X_Atn             | = 6[dB]              |
| X_Pulse           | = 4[us]              |
| Irr_Mode          | = Off                |
| Tri_Mode          | = Off                |
| Dante_Loop        | = 500                |
| Dante_Presat      | = FALSE              |
| Decimation_Rate   | = 0                  |
| Experiment_Path   | = c:\Program Files\J |
| Initial_Wait      | = 1[s]               |
| Phase             | = {0, 90, 270, 180,  |

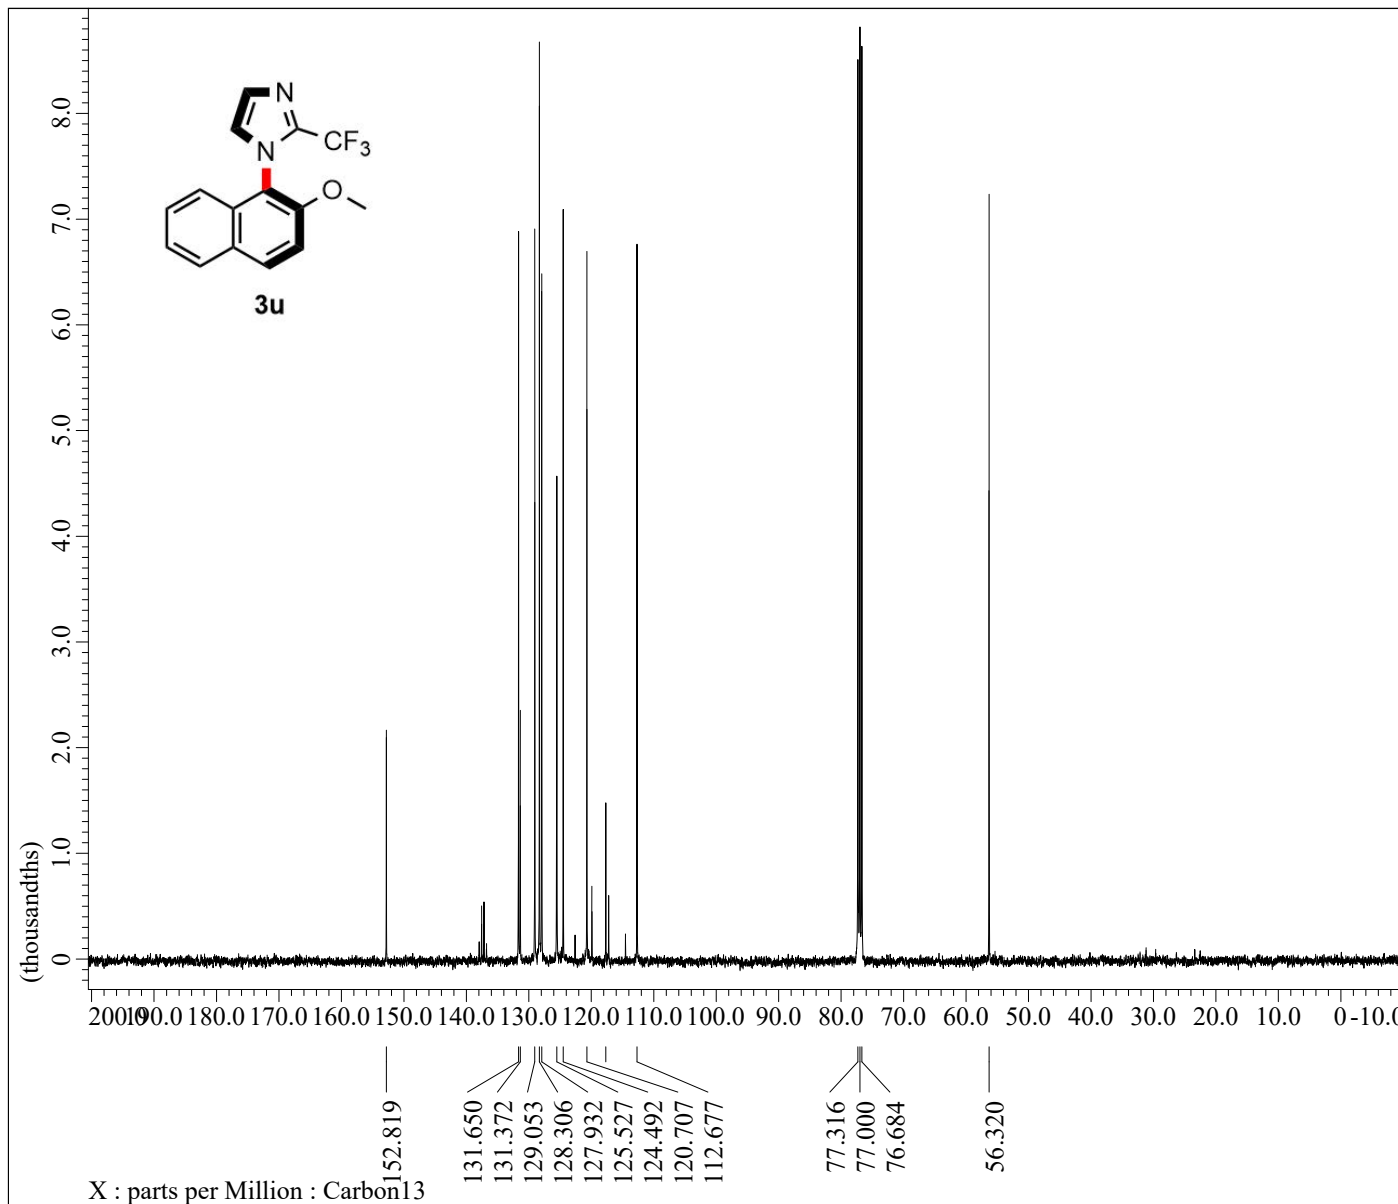

|                          |                   |
|--------------------------|-------------------|
| Filename                 | = MI-4-77-chiral- |
| Author                   | = delta           |
| Experiment               | = carbon_auto.jpg |
| Sample Id                | = MI-4-77-chiral- |
| Solvent                  | = CHLOROFORM-D    |
| Actual_Start_Time        | = 31-AUG-2023 01: |
| Revision_Time            | = 14-OCT-2023 05: |
| Comment                  | = MI-4-77-chiral- |
| Data_Format              | = 1D COMPLEX      |
| Dim_Size                 | = 26214           |
| Dim_Title                | = Carbon13        |
| Dim_Units                | = [ppm]           |
| Dimensions               | = X               |
| Spectrometer             | = JNM-ECZ400S/L1  |
| Field_Strength           | = 9.389766[T] (40 |
| X_Acq_Duration           | = 1.03809024[s]   |
| X_Domain                 | = Carbon13        |
| X_Freq                   | = 100.52530333[MH |
| X_Offset                 | = 100[ppm]        |
| X_Points                 | = 32768           |
| X_Prescans               | = 4               |
| X_Resolution             | = 0.96330739[Hz]  |
| X_Sweep                  | = 31.56565657[kHz |
| X_Sweep_Clipped          | = 25.25252525[kHz |
| Irr_Domain               | = Proton          |
| Irr_Freq                 | = 399.78219838[MH |
| Irr_Offset               | = 5[ppm]          |
| Blanking                 | = 5[us]           |
| Clipped                  | = TRUE            |
| Scans                    | = 1024            |
| Total_Scans              | = 1024            |
| Relaxation_Delay         | = 2[s]            |
| Recvr_Gain               | = 50              |
| Temp_Get                 | = 21.3[dC]        |
| X_90_Width               | = 11.1[us]        |
| X_Acq_Time               | = 1.03809024[s]   |
| X_Angle                  | = 30[deg]         |
| X_Atn                    | = 8[dB]           |
| X_Pulse                  | = 3.7[us]         |
| Irr_Atn_Dec              | = 29.152[dB]      |
| Irr_Atn_Dec_Calc         | = 29.152[dB]      |
| Irr_Atn_Dec_Default_Calc | = 29.152[dB]      |
| Irr_Atn_No               | = 29.152[dB]      |
| Irr_Dec_Bandwidth_Hz     | = 4.7826087[kHz]  |
| Irr_Dec_Bandwidth_Ppm    | = 11.96303566[ppm |
| Irr_Dec_Freq             | = 399.78219838[MH |
| Irr_Dec_Merit_Factor     | = 2.2             |
| Irr_Decoupling           | = TRUE            |
| Irr_No                   | = TRUE            |
| Irr_Noise                | = WALTZ           |

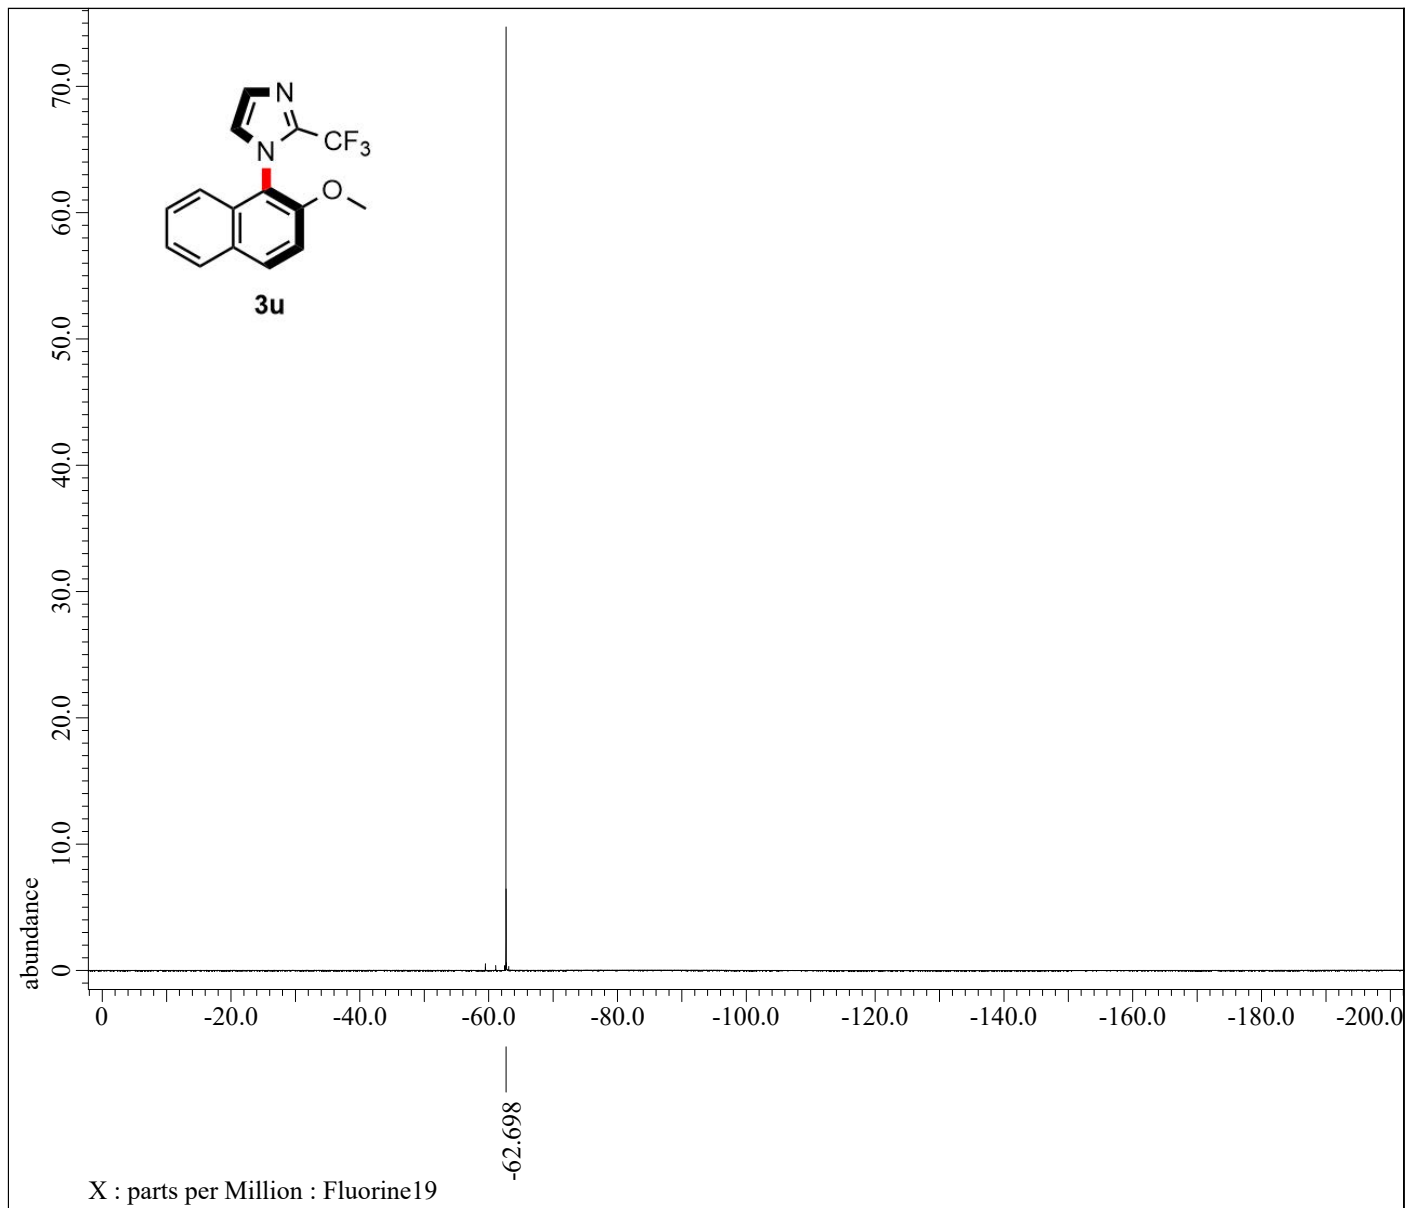

```

Filename      = MI-4-77-imi-CF3-Na
Author       = delta
Experiment   = single_pulse.jxp
Sample_Id    = MI-4-77-imi-CF3-Na
Solvent      = CHLOROFORM-D
Actual_Start_Time = 18-OCT-2023 15:38:
Revision_Time = 18-OCT-2023 22:46:

Comment      = MI-4-77-imi-CF3-Na
Data_Format  = 1D COMPLEX
Dim_Size     = 26214
Dim_Title    = Fluorine19
Dim_Units    = [ppm]
Dimensions   = X
Site         = ECA 500
Spectrometer = DELTA2_NMR

Field_Strength = 11.7473579[T] (500
X_Acq_Duration = 0.27262976[s]
X_Domain       = 19F
X_Freq         = 470.62046084[MHz]
X_Offset       = -100[ppm]
X_Points       = 32768
X_Prescans     = 1
X_Resolution   = 3.66797814[Hz]
X_Sweep        = 120.19230769[kHz]
X_Sweep_Clipped = 96.15384615[kHz]
Irr_Domain     = Fluorine19
Irr_Freq       = 470.62046084[MHz]
Irr_Offset     = 5[ppm]
Tri_Domain     = Fluorine19
Tri_Freq       = 470.62046084[MHz]
Tri_Offset     = 5[ppm]
Clipped        = FALSE
Scans          = 32
Total_Scans    = 32

Relaxation_Delay = 5[s]
Recvr_Gain       = 46
Temp_Get         = 19.5[dC]
X_90_Width      = 13.6[us]
X_Acq_Time       = 0.27262976[s]
X_Angle         = 45[deg]
X_Atn           = 2.5[dB]
X_Pulse         = 6.8[us]
Irr_Mode        = Off
Tri_Mode        = Off
Dante_Loop      = 500
Dante_Presat    = FALSE
Decimation_Rate = 0
Force_Dual_Mode = FALSE
Initial_Wait    = 1[s]
Presat_Time     = 5[s]

```

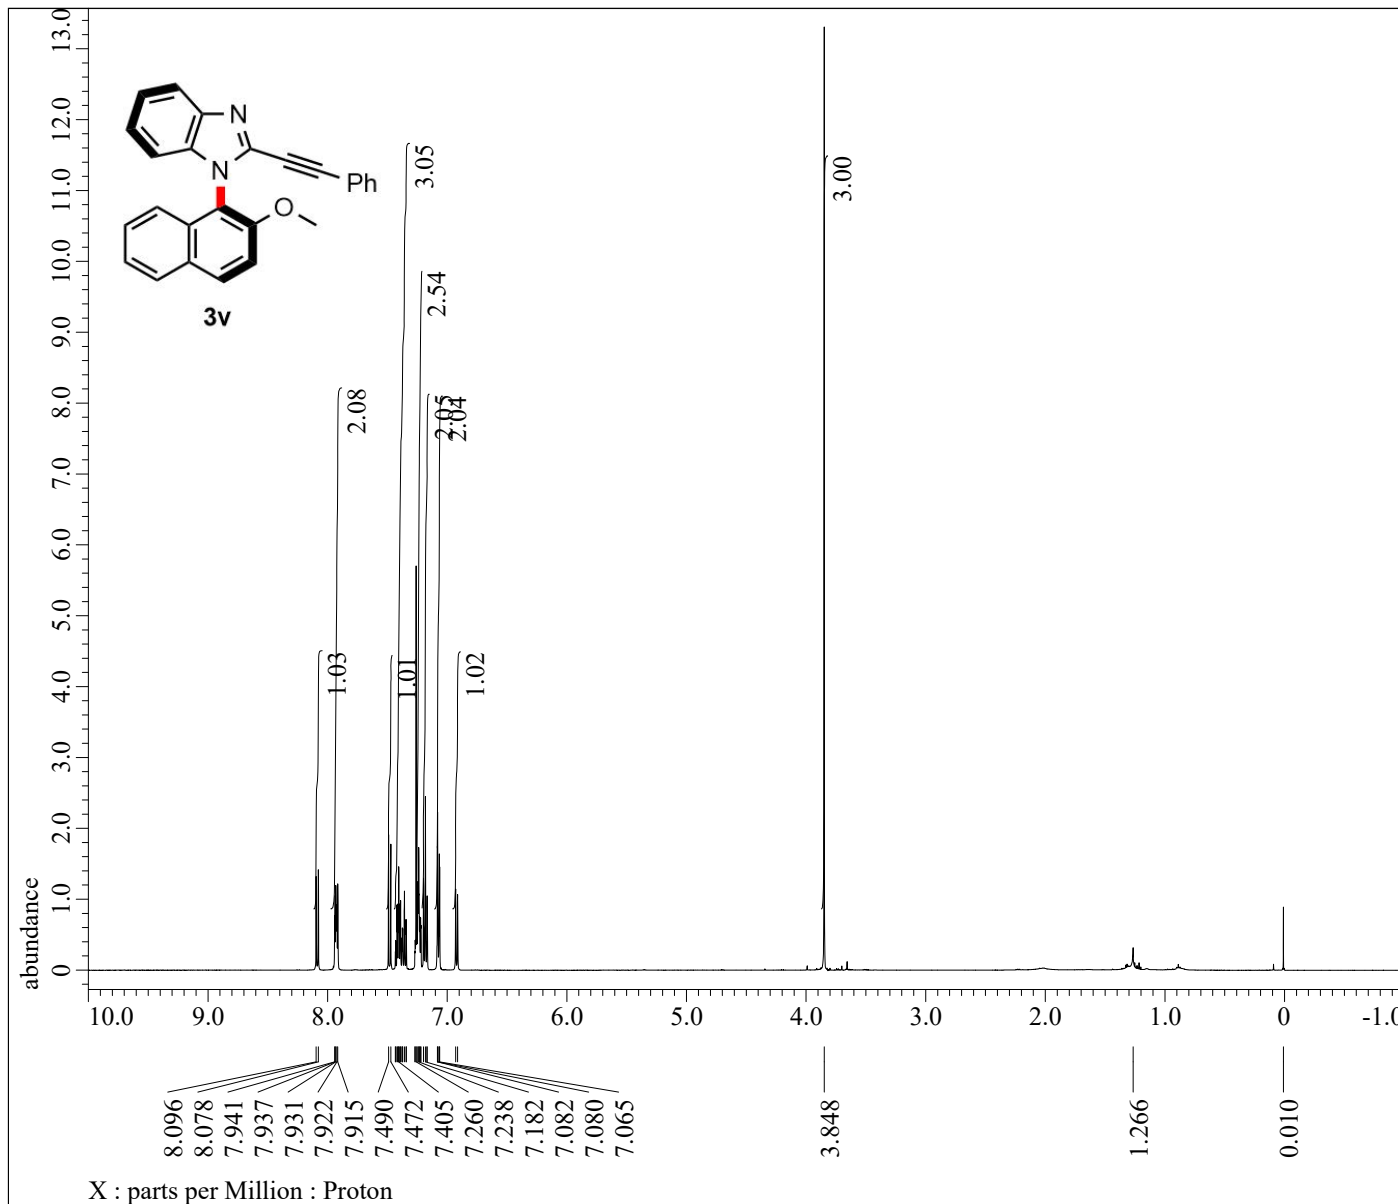

```

Filename      = YKK-2-58-after-GPC-1H-
Author        = delta
Experiment    = proton.jpg
Sample Id     = YKK-2-58-after-GPC-1H-
Solvent       = CHLOROFORM-D
Actual_Start_Time = 3-OCT-2023 19:50:26
Revision_Time = 16-OCT-2023 00:06:03

Comment      = YKK-2-58-after-GPC-1H-
Data_Format  = 1D COMPLEX
Dim_Size     = 13107
Dim_Title    = Proton
Dim_Units    = [ppm]
Dimensions   = X
Site         = ECA 500
Spectrometer = DELTA2_NMR

Field_Strength = 11.7473579 [T] (500 [MHz])
X_Acq_Duration = 1.74587904 [s]
X_Domain      = 1H
X_Freq       = 500.15991521 [MHz]
X_Offset     = 5.0 [ppm]
X_Points     = 16384
X_Prescans   = 1
X_Resolution = 0.57277737 [Hz]
X_Sweep      = 9.38438438 [kHz]
X_Sweep_Clip = 7.50750751 [kHz]
Irr_Domain   = Proton
Irr_Freq     = 500.15991521 [MHz]
Irr_Offset   = 5.0 [ppm]
Tri_Domain   = Proton
Tri_Freq     = 500.15991521 [MHz]
Tri_Offset   = 5.0 [ppm]
Clipped      = FALSE
Scans        = 8
Total_Scans  = 8

Relaxation_Delay = 5 [s]
Recvr_Gain       = 30
Temp_Get        = 19.5 [dC]
X_90_Width     = 12.7 [us]
X_Acq_Time     = 1.74587904 [s]
X_Angle        = 45 [deg]
X_Atn          = 3 [dB]
X_Pulse        = 6.35 [us]
Irr_Mode       = Off
Tri_Mode       = Off
Dante_Presat   = FALSE
Initial_Wait   = 1 [s]
Repetition_Time = 6.74587904 [s]

```

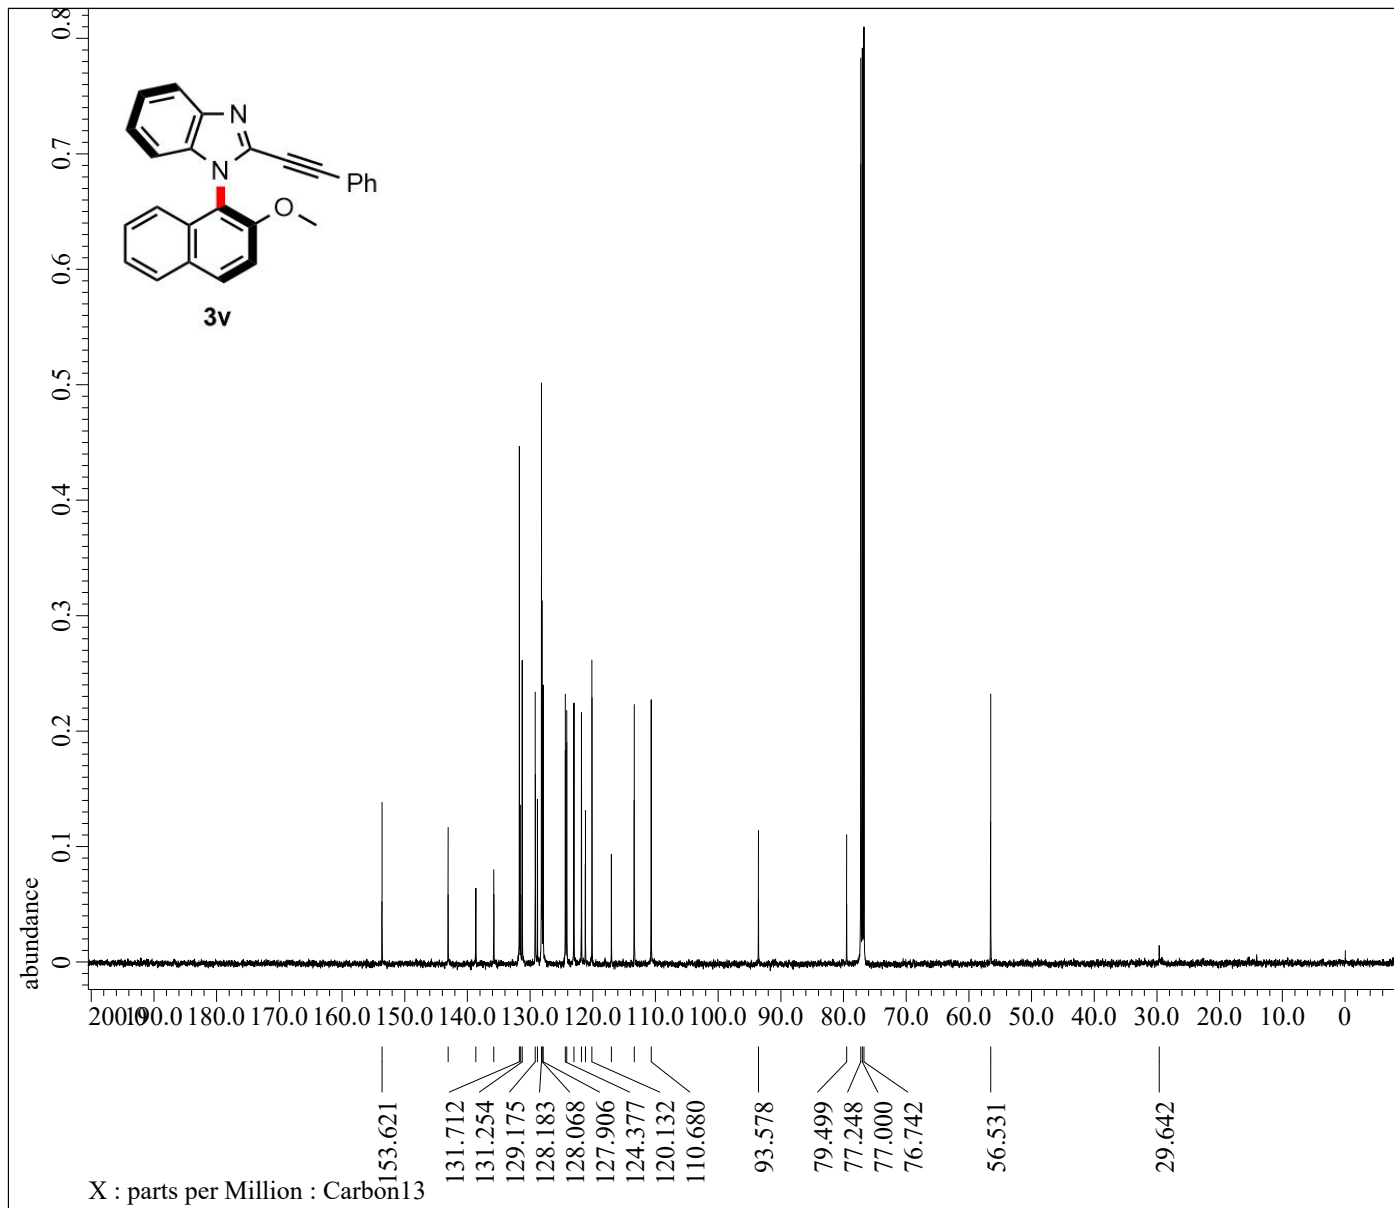

```

Filename      = YKK-2-58-after-GPC-13C
Author       = delta
Experiment   = carbon.jpg
Sample Id    = YKK-2-58-after-GPC-13C
Solvent      = CHLOROFORM-D
Actual_Start_Time = 3-OCT-2023 19:55:57
Revision_Time  = 16-OCT-2023 00:08:05

Comment      = YKK-2-58-after-GPC-13C
Data_Format  = 1D_COMPLEX
Dim_Size     = 26214
Dim_Title    = Carbon13
Dim_Units    = [ppm]
Dimensions   = X
Site         = ECA 500
Spectrometer = DELTA2_NMR

Field_Strength = 11.7473579[T] (500[MHz]
X_Acq_Duration = 0.83361792[s]
X_Domain       = 13C
X_Freq         = 125.76529768[MHz]
X_Offset       = 100[ppm]
X_Points      = 32768
X_Prescans    = 4
X_Resolution  = 1.19959034[Hz]
X_Sweep       = 39.3081761[kHz]
X_Sweep_Clipped = 31.44654088[kHz]
Irr_Domain    = Proton
Irr_Freq      = 500.15991521[MHz]
Irr_Offset    = 5.0[ppm]
Clipped       = TRUE
Scans         = 959
Total_Scans   = 959

Relaxation_Delay = 2[s]
Recvr_Gain       = 50
Temp_Get         = 20.8[dC]
X_90_Width      = 13.7[us]
X_Acq_Time      = 0.83361792[s]
X_Angle         = 30[deg]
X_Atn           = 5.5[dB]
X_Pulse         = 4.56666667[us]
Irr_Atn_Dec     = 20.2[dB]
Irr_Atn_No     = 20.2[dB]
Irr_Noise       = WALTZ
Irr_Pwidth      = 92[us]
Decoupling      = TRUE
Initial_Wait    = 1[s]
Noe             = TRUE
Noe_Time        = 2[s]
Repetition_Time = 2.83361792[s]

```



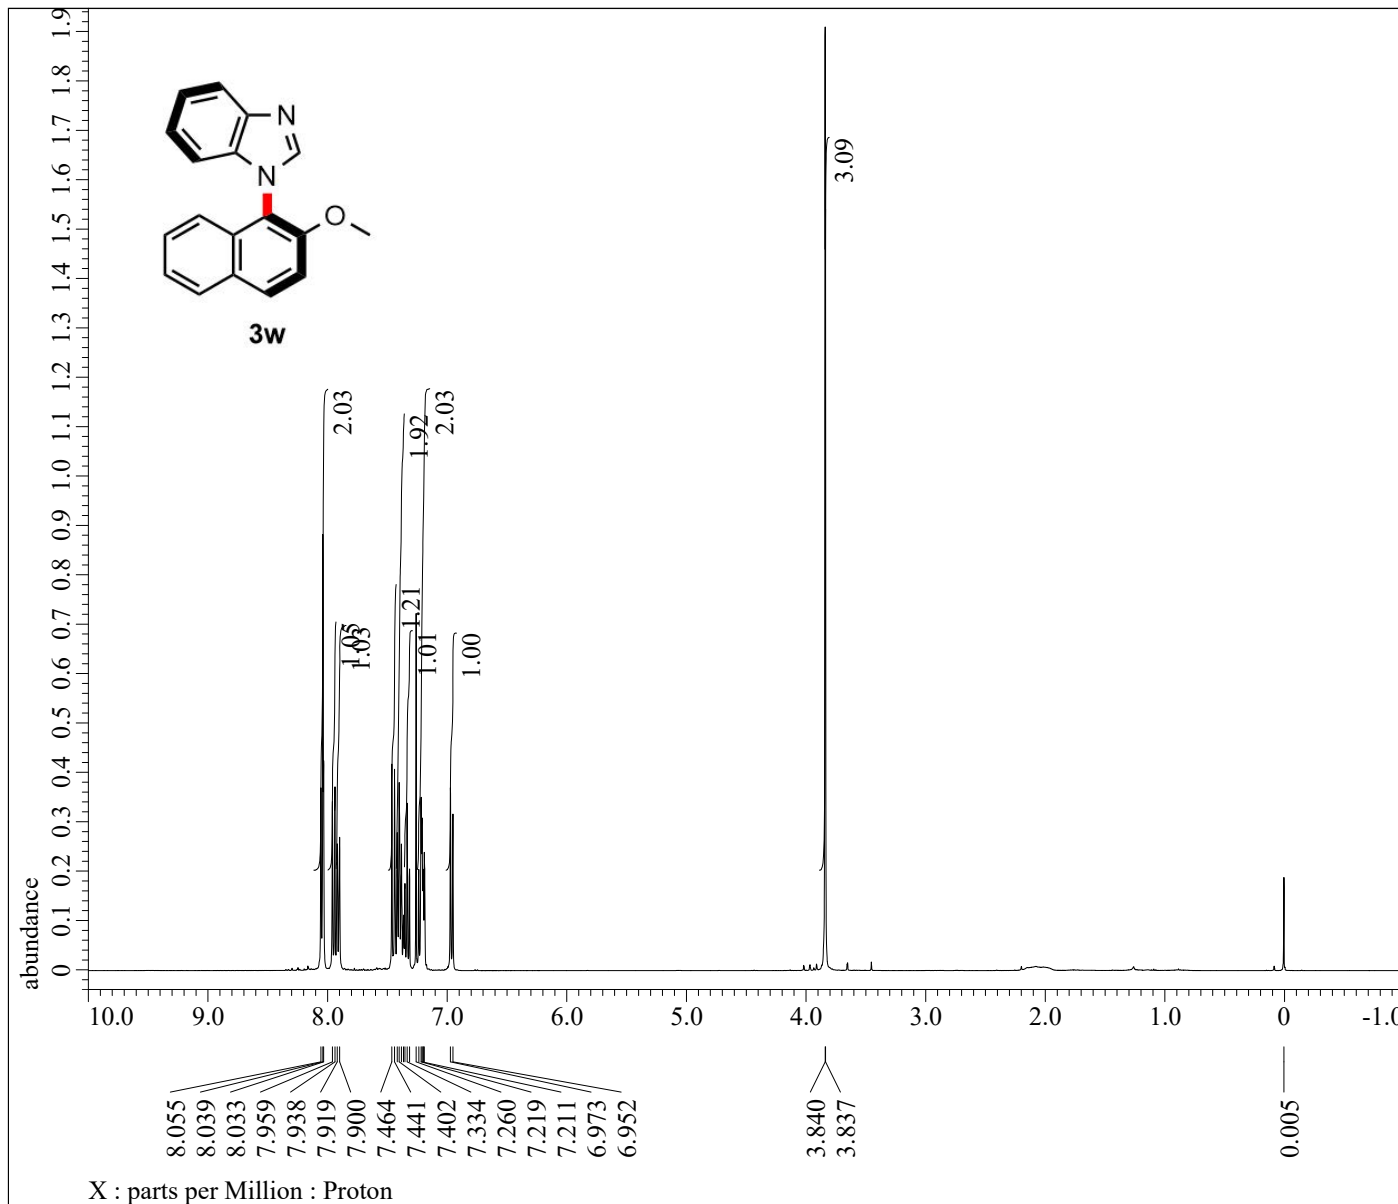

|                   |                      |
|-------------------|----------------------|
| Filename          | = MI-4-71-chiral-Ber |
| Author            | = delta              |
| Experiment        | = proton_auto.jxp    |
| Sample Id         | = MI-4-71-chiral-Ber |
| Solvent           | = CHLOROFORM-D       |
| Actual_Start_Time | = 7-SEP-2023 19:17:  |
| Revision_Time     | = 13-OCT-2023 01:15: |
| Comment           | = MI-4-71-chiral-Ber |
| Data_Format       | = 1D COMPLEX         |
| Dim_Size          | = 13107              |
| Dim_Title         | = Proton             |
| Dim_Units         | = [ppm]              |
| Dimensions        | = X                  |
| Spectrometer      | = JNM-ECZ400S/L1     |
| Field_Strength    | = 9.389766[T] (400[M |
| X_Acq_Duration    | = 2.18628096[s]      |
| X_Domain          | = Proton             |
| X_Freq            | = 399.78219838[MHz]  |
| X_Offset          | = 5[ppm]             |
| X_Points          | = 16384              |
| X_Prescans        | = 1                  |
| X_Resolution      | = 0.45739775[Hz]     |
| X_Sweep           | = 7.4940048[kHz]     |
| X_Sweep_Clipped   | = 5.99520384[kHz]    |
| Irr_Domain        | = Proton             |
| Irr_Freq          | = 399.78219838[MHz]  |
| Irr_Offset        | = 5[ppm]             |
| Tri_Domain        | = Proton             |
| Tri_Freq          | = 399.78219838[MHz]  |
| Tri_Offset        | = 5[ppm]             |
| Blanking          | = 2[us]              |
| Clipped           | = FALSE              |
| Scans             | = 8                  |
| Total_Scans       | = 8                  |
| Relaxation_Delay  | = 5[s]               |
| Recvr_Gain        | = 46                 |
| Temp_Get          | = 21.1[dC]           |
| X_90_Width        | = 8[us]              |
| X_Acq_Time        | = 2.18628096[s]      |
| X_Angle           | = 45[deg]            |
| X_Atn             | = 6[dB]              |
| X_Pulse           | = 4[us]              |
| Irr_Mode          | = Off                |
| Tri_Mode          | = Off                |
| Dante_Loop        | = 500                |
| Dante_Presat      | = FALSE              |
| Decimation_Rate   | = 0                  |
| Experiment_Path   | = c:\Program Files\J |
| Initial_Wait      | = 1[s]               |
| Phase             | = {0, 90, 270, 180,  |

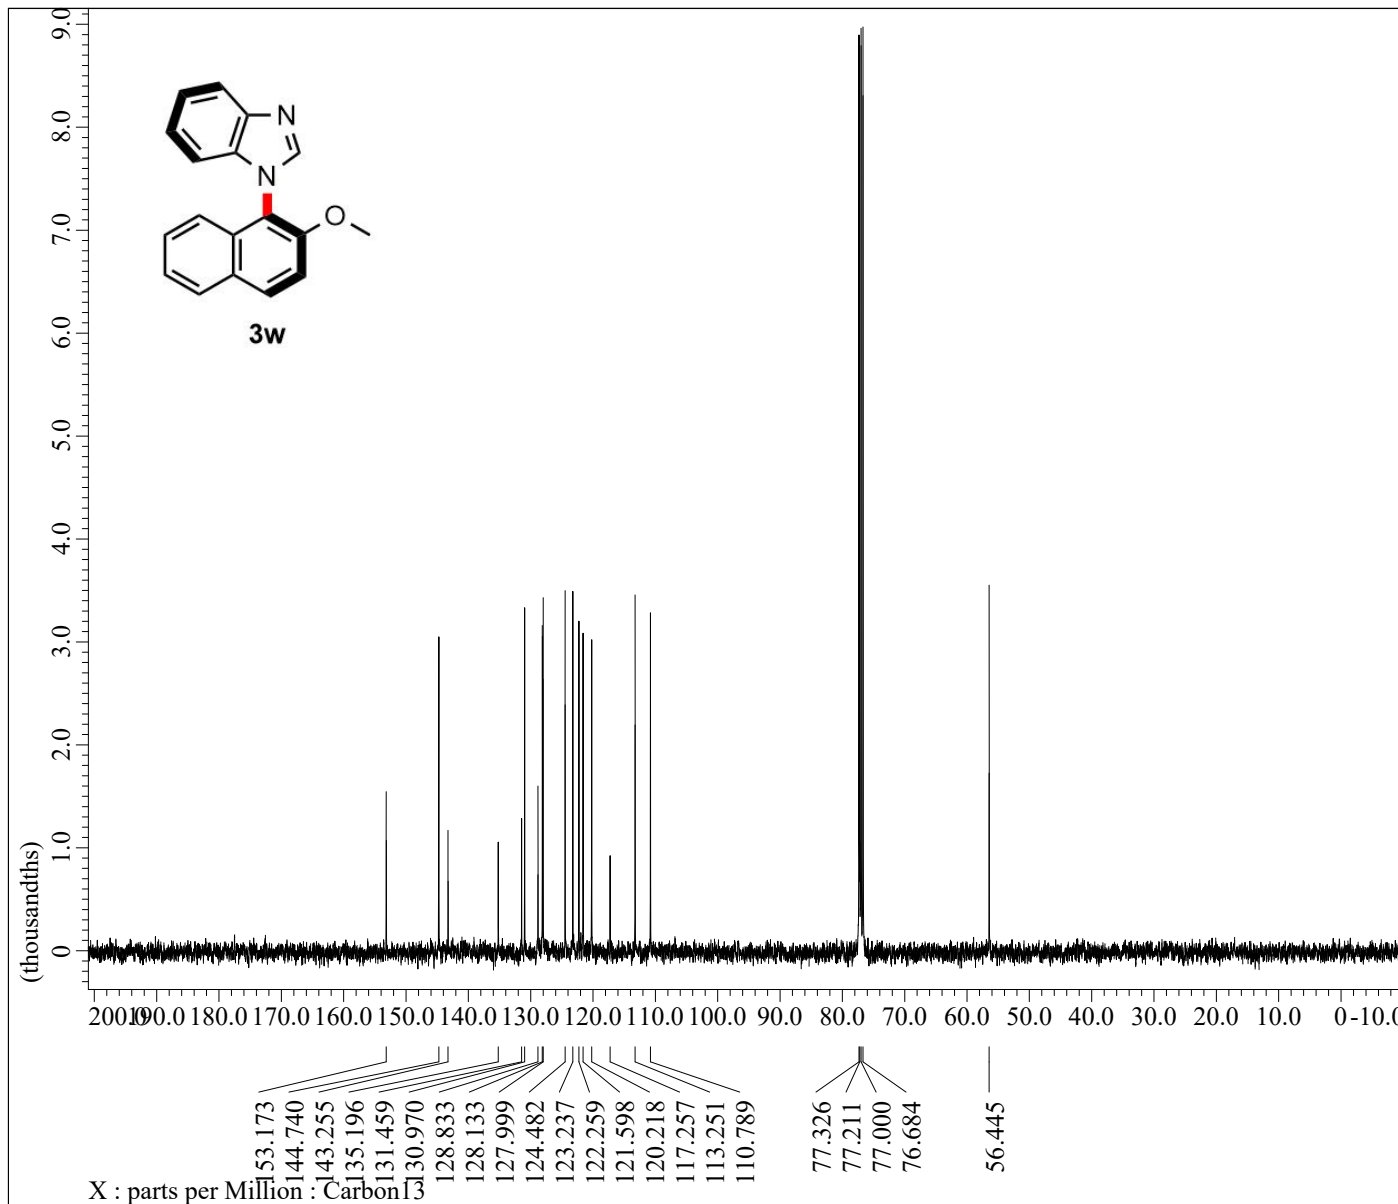

|                          |                   |
|--------------------------|-------------------|
| Filename                 | = MI-4-71-chiral- |
| Author                   | = delta           |
| Experiment               | = carbon_auto.jpg |
| Sample Id                | = MI-4-71-chiral- |
| Solvent                  | = CHLOROFORM-D    |
| Actual_Start_Time        | = 7-SEP-2023 21:  |
| Revision_Time            | = 14-OCT-2023 01: |
| Comment                  | = MI-4-71-chiral- |
| Data_Format              | = 1D COMPLEX      |
| Dim_Size                 | = 26214           |
| Dim_Title                | = Carbon13        |
| Dim_Units                | = [ppm]           |
| Dimensions               | = X               |
| Spectrometer             | = JNM-ECZ400S/L1  |
| Field_Strength           | = 9.389766[T] (40 |
| X_Acq_Duration           | = 1.03809024[s]   |
| X_Domain                 | = Carbon13        |
| X_Freq                   | = 100.52530333[MH |
| X_Offset                 | = 100[ppm]        |
| X_Points                 | = 32768           |
| X_Prescans               | = 4               |
| X_Resolution             | = 0.96330739[Hz]  |
| X_Sweep                  | = 31.56565657[kHz |
| X_Sweep_Clipped          | = 25.25252525[kHz |
| Irr_Domain               | = Proton          |
| Irr_Freq                 | = 399.78219838[MH |
| Irr_Offset               | = 5[ppm]          |
| Blanking                 | = 5[us]           |
| Clipped                  | = TRUE            |
| Scans                    | = 256             |
| Total_Scans              | = 256             |
| Relaxation_Delay         | = 2[s]            |
| Recvr_Gain               | = 50              |
| Temp_Get                 | = 20.9[dC]        |
| X_90_Width               | = 11.1[us]        |
| X_Acq_Time               | = 1.03809024[s]   |
| X_Angle                  | = 30[deg]         |
| X_Atn                    | = 8[dB]           |
| X_Pulse                  | = 3.7[us]         |
| Irr_Atn_Dec              | = 29.152[dB]      |
| Irr_Atn_Dec_Calc         | = 29.152[dB]      |
| Irr_Atn_Dec_Default_Calc | = 29.152[dB]      |
| Irr_Atn_No               | = 29.152[dB]      |
| Irr_Dec_Bandwidth_Hz     | = 4.7826087[kHz]  |
| Irr_Dec_Bandwidth_Ppm    | = 11.96303566[ppm |
| Irr_Dec_Freq             | = 399.78219838[MH |
| Irr_Dec_Merit_Factor     | = 2.2             |
| Irr_Decoupling           | = TRUE            |
| Irr_No                   | = TRUE            |
| Irr_Noise                | = WALTZ           |
